# Supplementary material for: Contrast diversity patterns and processes of microbial community assembly in a river-lake continuum across a catchment scale in northwestern China
Source: PubMed Central journal article supplement (PMC8066441; doi:10.1186/s40793-020-00356-9), 2020-04-25
Supplement: 40793_2020_356_MOESM1_ESM.pdf [file 40793_2020_356_MOESM1_ESM.pdf]

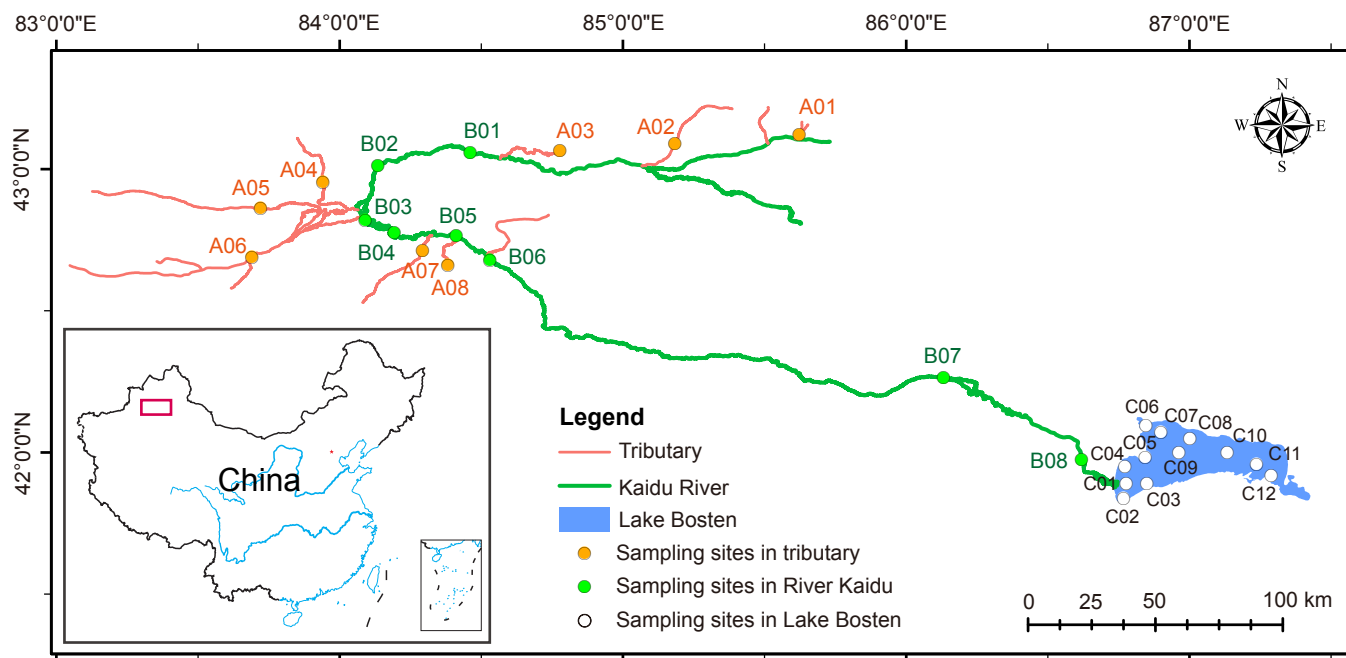

**Figure S1.** Overview map of the River Kaidu catchment showing the sampling sites in upstream tributaries (A01~A08), River Kaidu (B01~B08) and Lake Bosten (C01~C12).
