# Supplementary material for: Contrast diversity patterns and processes of microbial community assembly in a river-lake continuum across a catchment scale in northwestern China
Source: PubMed Central journal article supplement (PMC8066441; doi:10.1186/s40793-020-00356-9), 2020-04-25
Supplement: 40793_2020_356_MOESM5_ESM.pdf [file 40793_2020_356_MOESM5_ESM.pdf]

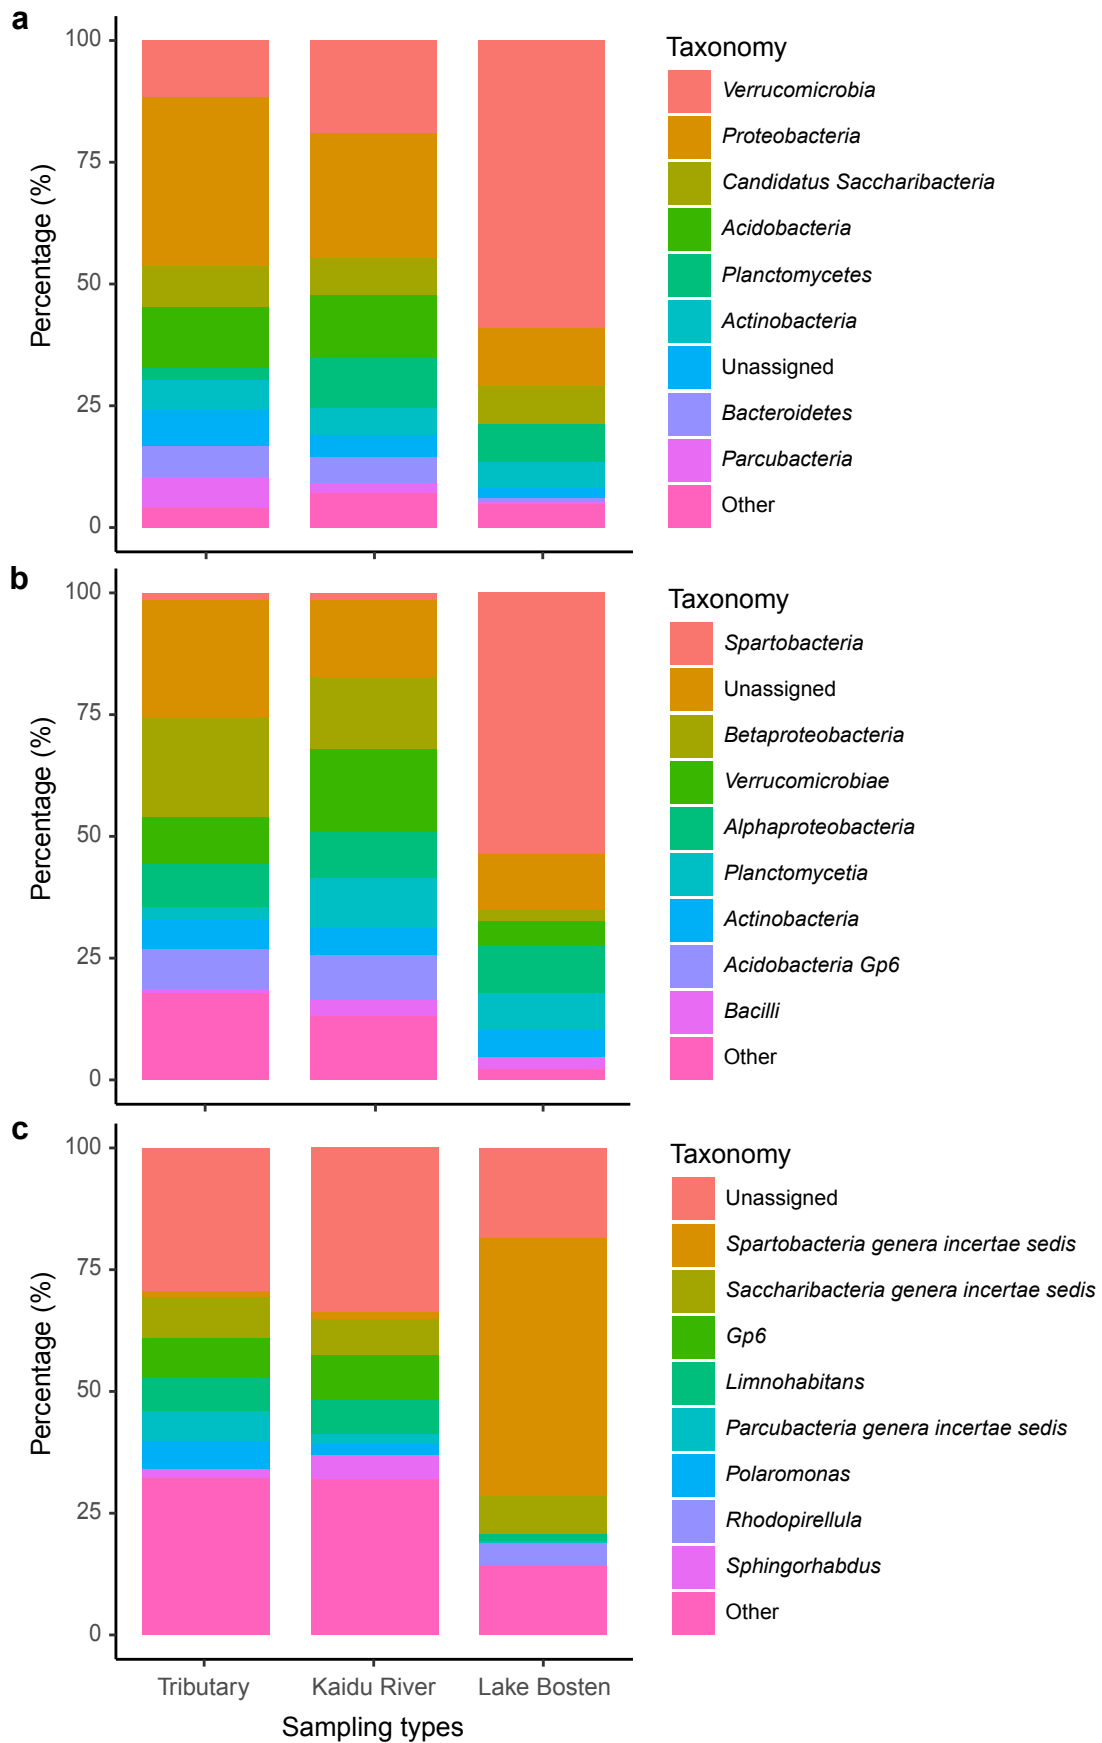

**Figure S4.** Taxonomy composition of main microbial communities in each sampling type at **a** phylum-level, **b** class-level and **c** genus-level.
