# Supplementary material for: Contrast diversity patterns and processes of microbial community assembly in a river-lake continuum across a catchment scale in northwestern China
Source: PubMed Central journal article supplement (PMC8066441; doi:10.1186/s40793-020-00356-9), 2020-04-25
Supplement: 40793_2020_356_MOESM6_ESM.pdf [file 40793_2020_356_MOESM6_ESM.pdf]

**Table S2** The top 10 ASVs in river and lake habitats and their taxonomic classification.

| Rank | ASV_ID | Mean abundance (%) |       | Taxonomy               |                            |                            |                       |
|------|--------|--------------------|-------|------------------------|----------------------------|----------------------------|-----------------------|
|      |        | River              | Lake  | Phylum                 | Class                      | Family                     | Genus                 |
| 1    | ASV_13 | 2.484              | 0.001 | <i>Verrucomicrobia</i> | <i>Verrucomicrobiae</i>    | <i>Verrucomicrobiaceae</i> | Unassigned            |
| 2    | ASV_5  | 2.269              | 0.245 | <i>Verrucomicrobia</i> | <i>Verrucomicrobiae</i>    | <i>Verrucomicrobiaceae</i> | Unassigned            |
| 3    | ASV_12 | 1.650              | 0.346 | <i>Planctomycetes</i>  | <i>Planctomycetia</i>      | <i>Planctomycetaceae</i>   | <i>Zavarzinella</i>   |
| 4    | ASV_18 | 1.610              | 0.002 | <i>Proteobacteria</i>  | <i>Alphaproteobacteria</i> | <i>Sphingomonadaceae</i>   | <i>Sphingorhabdus</i> |
| 5    | ASV_17 | 1.433              | 0.100 | <i>Planctomycetes</i>  | <i>Planctomycetia</i>      | <i>Planctomycetaceae</i>   | Unassigned            |
| 6    | ASV_22 | 1.412              | 0.111 | <i>Proteobacteria</i>  | <i>Gammaproteobacteria</i> | <i>Pseudomonadaceae</i>    | <i>Pseudomonas</i>    |
| 7    | ASV_7  | 1.282              | 0.004 | <i>Proteobacteria</i>  | <i>Betaproteobacteria</i>  | <i>Comamonadaceae</i>      | <i>Limnohabitans</i>  |
| 8    | ASV_28 | 1.151              | 0.116 | <i>Verrucomicrobia</i> | <i>Verrucomicrobiae</i>    | <i>Verrucomicrobiaceae</i> | Unassigned            |
| 9    | ASV_33 | 1.071              | 0.008 | <i>Proteobacteria</i>  | <i>Betaproteobacteria</i>  | <i>Comamonadaceae</i>      | <i>Polaromonas</i>    |
| 10   | ASV_15 | 1.010              | 0.006 | <i>Proteobacteria</i>  | <i>Betaproteobacteria</i>  | <i>Comamonadaceae</i>      | <i>Limnohabitans</i>  |

  

| Rank | ASV_ID | Lake   | River | Phylum                 | Class                      | Family     | Genus                                       |
|------|--------|--------|-------|------------------------|----------------------------|------------|---------------------------------------------|
|      |        |        |       |                        |                            |            |                                             |
| 1    | ASV_1  | 11.685 | 0.000 | <i>Verrucomicrobia</i> | <i>Spartobacteria</i>      | Unassigned | <i>Spartobacteria</i> genera incertae sedis |
| 2    | ASV_2  | 10.780 | 0.010 | <i>Verrucomicrobia</i> | <i>Spartobacteria</i>      | Unassigned | <i>Spartobacteria</i> genera incertae sedis |
| 3    | ASV_3  | 5.723  | 0.004 | <i>Verrucomicrobia</i> | <i>Spartobacteria</i>      | Unassigned | <i>Spartobacteria</i> genera incertae sedis |
| 4    | ASV_4  | 4.841  | 0.000 | <i>Proteobacteria</i>  | <i>Alphaproteobacteria</i> | SAR11      | Candidatus <i>Fonsibacter</i>               |
| 5    | ASV_6  | 3.232  | 0.042 | <i>Verrucomicrobia</i> | <i>Spartobacteria</i>      | Unassigned | <i>Spartobacteria</i> genera incertae sedis |
| 6    | ASV_9  | 3.049  | 0.002 | <i>Verrucomicrobia</i> | <i>Spartobacteria</i>      | Unassigned | <i>Spartobacteria</i> genera incertae sedis |
| 7    | ASV_8  | 2.751  | 0.000 | <i>Verrucomicrobia</i> | <i>Spartobacteria</i>      | Unassigned | <i>Spartobacteria</i> genera incertae sedis |
| 8    | ASV_14 | 2.685  | 0.002 | <i>Verrucomicrobia</i> | <i>Spartobacteria</i>      | Unassigned | <i>Spartobacteria</i> genera incertae sedis |
| 9    | ASV_11 | 2.607  | 0.000 | <i>Verrucomicrobia</i> | <i>Spartobacteria</i>      | Unassigned | <i>Spartobacteria</i> genera incertae sedis |
| 10   | ASV_10 | 2.595  | 0.000 | <i>Verrucomicrobia</i> | <i>Spartobacteria</i>      | Unassigned | <i>Spartobacteria</i> genera incertae sedis |
