# Supplementary material for: Contrast diversity patterns and processes of microbial community assembly in a river-lake continuum across a catchment scale in northwestern China
Source: PubMed Central journal article supplement (PMC8066441; doi:10.1186/s40793-020-00356-9), 2020-04-25
Supplement: 40793_2020_356_MOESM7_ESM.pdf [file 40793_2020_356_MOESM7_ESM.pdf]

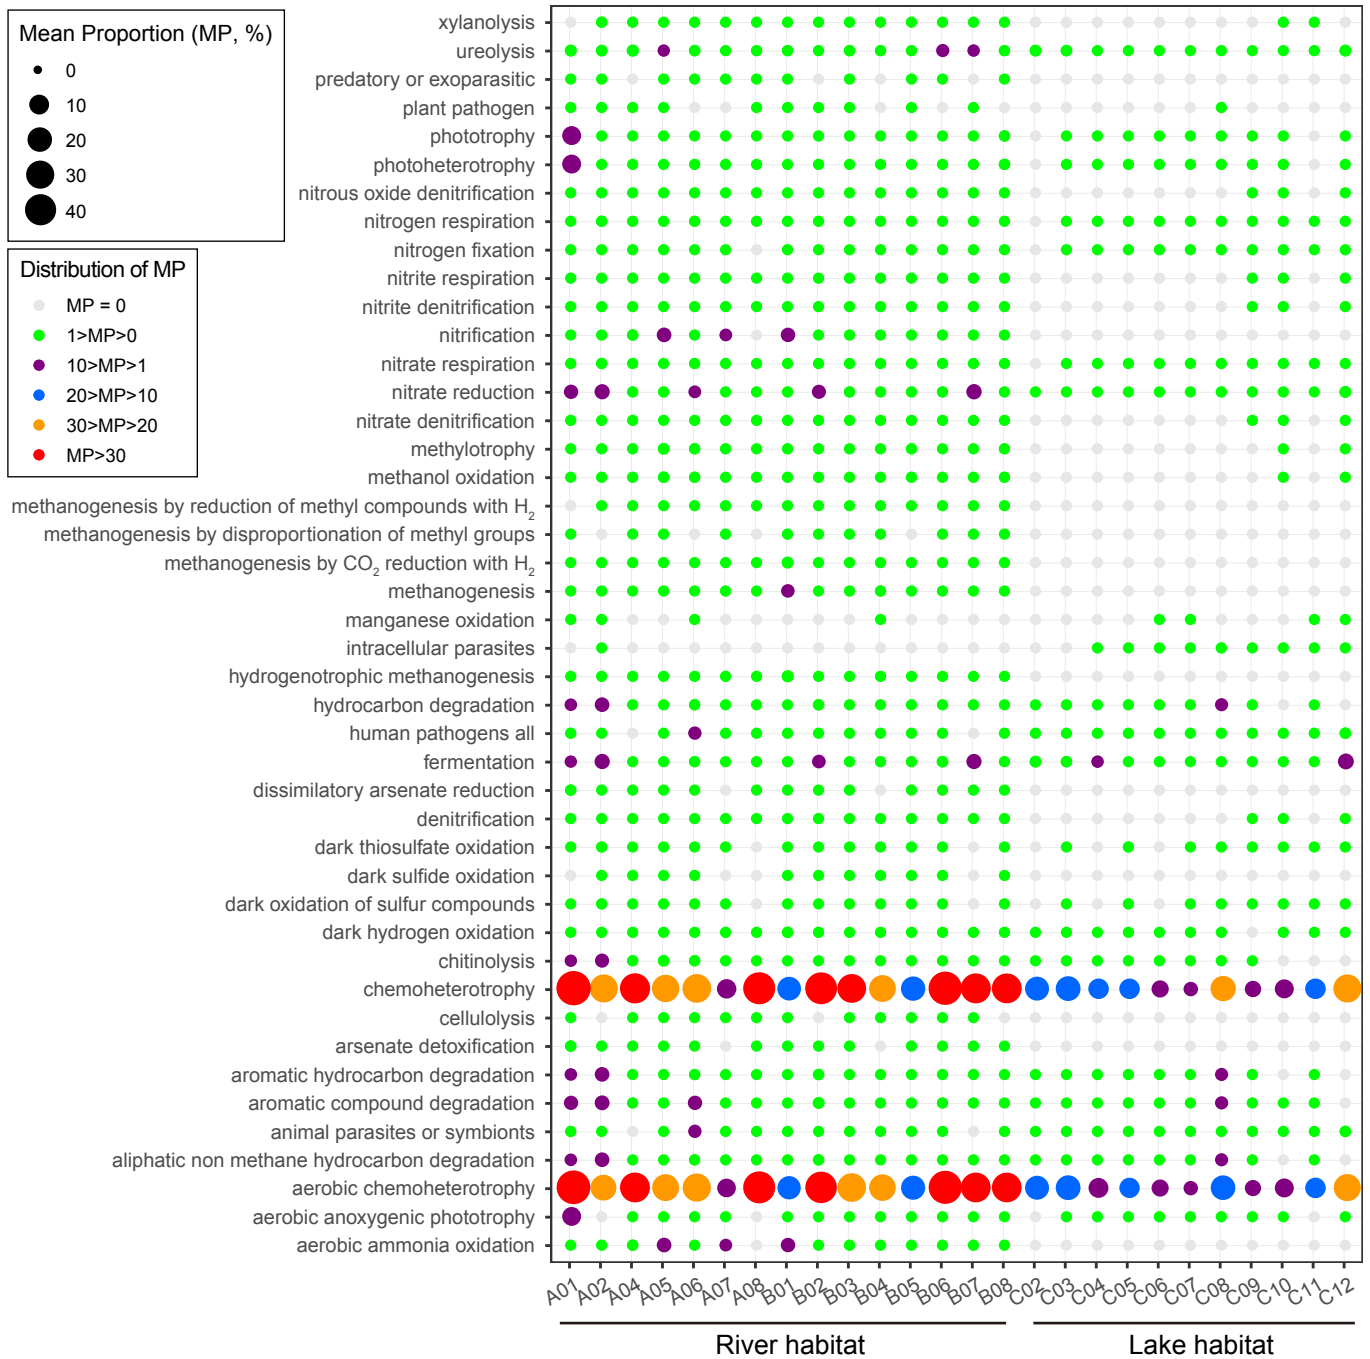

**Figure S5.** Mean proportions of predicted functional groups across samples from river habitats (upstream tributaries and mainstream of the Kaidu River,  $n = 15$ ) to lake habitats (Lake Bosten,  $n = 11$ ).
