# Supplementary material for: Contrast diversity patterns and processes of microbial community assembly in a river-lake continuum across a catchment scale in northwestern China
Source: PubMed Central journal article supplement (PMC8066441; doi:10.1186/s40793-020-00356-9), 2020-04-25
Supplement: 40793_2020_356_MOESM8_ESM.pdf [file 40793_2020_356_MOESM8_ESM.pdf]

**Table S3** Summary of CCA results using forward selection procedure on square root transformed environmental variables.

| Variables | Explains % | Contribution % | pseudo- <i>F</i> | <i>P</i> | <i>P</i> <sub>(adj)</sub> |
|-----------|------------|----------------|------------------|----------|---------------------------|
| TDS       | 28.4       | 61.9           | 9.5              | 0.001    | 0.001                     |
| TSS       | 6.2        | 13.6           | 2.2              | 0.001    | 0.001                     |
| WT        | 5.6        | 12.2           | 2.1              | 0.002    | 0.003                     |
| TN        | 5.6        | 12.3           | 2.2              | 0.024    | 0.024                     |

Note: *P* value was generated from permutation test with 999 permutations. *P*<sub>(adj)</sub> for multiple testing correction or false discovery rate (FDR).
