# Supplementary material for: Contrast diversity patterns and processes of microbial community assembly in a river-lake continuum across a catchment scale in northwestern China
Source: PubMed Central journal article supplement (PMC8066441; doi:10.1186/s40793-020-00356-9), 2020-04-25
Supplement: 40793_2020_356_MOESM10_ESM.pdf [file 40793_2020_356_MOESM10_ESM.pdf]

**Table S4** The top 2 ASVs in the river habitat with their closest 5 relatives in NCBI GenBank database showing the source of them.

| ASVs       | Query Cover | Percentage of Identity | Accession  | Source                           |
|------------|-------------|------------------------|------------|----------------------------------|
| ASV_1<br>3 | 100%        | 100%                   | MG278022.1 | Leaf, root, soil                 |
|            | 100%        | 100%                   | KF494650.1 | Permafrost soil                  |
|            | 100%        | 100%                   | JX257578.1 | Periphyton                       |
|            | 100%        | 100%                   | HF543906.1 | Biofilm of stone                 |
|            | 100%        | 100%                   | JN232912.1 | Reclaimed wastewater             |
| ASV_5      | 100%        | 100%                   | KC683173.1 | Periphyton                       |
|            | 100%        | 100%                   | KC683164.1 | Periphyton                       |
|            | 100%        | 100%                   | JN868993.1 | Lake Taihu                       |
|            | 100%        | 100%                   | FQ660363.1 | PAH-contaminated soil            |
|            | 100%        | 100%                   | HQ602857.1 | Culture inoculated with sediment |
