# Supplementary material for: Contrast diversity patterns and processes of microbial community assembly in a river-lake continuum across a catchment scale in northwestern China
Source: Environ Microbiome. 2020 Apr 25;15:10. doi: 10.1186/s40793-020-00356-9 (PMC8066441; doi:10.1186/s40793-020-00356-9)
Supplement: Supplementary file 4 — Additional file 4: Table S1. The amplicon sequence variants (ASVs) table for all sample. [file 40793_2020_356_MOESM4_ESM.xlsx]

## Sheet: Sheet1
#ASVID	A01	A02	A03	A04	A05	A06	A07	A08	B01	B02	B03	B04	B05	B06	B07	B08	C01	C02	C03	C04	C05	C06	C07	C08	C09	C10	C11	C12	Sum		Kingdom	Phylum	Class	Order	Family	Genus	Species
ASV_1	0	0	1	1	0	0	0	0	0	0	0	0	0	0	1	0	12	1585	483	15857	5992	4926	15264	518	5243	2525	6922	2555	61885		Bacteria	Verrucomicrobia	Spartobacteria	Unassigned	Unassigned	Spartobacteria_genera_incertae_sedis	Unassigned
ASV_2	0	3	0	1	0	8	0	7	16	6	2	3	4	6	1	2	744	9523	2274	4292	5699	1708	6816	2711	12203	5423	4522	1908	57882		Bacteria	Verrucomicrobia	Spartobacteria	Unassigned	Unassigned	Spartobacteria_genera_incertae_sedis	Unassigned
ASV_3	0	0	0	0	0	0	2	10	2	1	3	0	2	3	0	0	153	4135	557	2388	2595	1302	5406	1084	5309	3794	2961	770	30477		Bacteria	Verrucomicrobia	Spartobacteria	Unassigned	Unassigned	Spartobacteria_genera_incertae_sedis	Unassigned
ASV_4	1	0	0	0	0	0	0	0	0	0	0	1	0	0	0	0	988	164	10386	931	1768	103	4535	4240	1872	447	832	352	26620		Bacteria	Proteobacteria	Alphaproteobacteria	Unassigned	Unassigned	Unassigned	Unassigned
ASV_5	2	0	0	515	111	180	98	6137	259	287	1355	867	280	702	1412	1217	6085	293	1001	2	0	0	0	0	0	0	1	2	20806		Bacteria	Verrucomicrobia	Verrucomicrobiae	Verrucomicrobiales	Verrucomicrobiaceae	Unassigned	Unassigned
ASV_7	10	3	9910	17	25	11	3	2	279	1321	65	197	4573	67	2	1010	10	1	3	1	0	0	0	9	1	3	0	2	17525		Bacteria	Proteobacteria	Betaproteobacteria	Burkholderiales	Comamonadaceae	Limnohabitans	Unassigned
ASV_6	0	0	3	87	22	8	12	17	11	2	33	21	8	12	2	16	135	1807	616	1130	2052	325	1782	951	4081	1958	1774	635	17500		Bacteria	Verrucomicrobia	Spartobacteria	Unassigned	Unassigned	Spartobacteria_genera_incertae_sedis	Unassigned
ASV_9	0	0	0	0	1	1	1	0	4	0	1	0	0	0	1	0	374	2892	524	737	1506	613	1071	1627	2652	1732	1112	1677	16526		Bacteria	Verrucomicrobia	Spartobacteria	Unassigned	Unassigned	Spartobacteria_genera_incertae_sedis	Unassigned
ASV_13	24	30	5	3011	876	1032	145	1042	818	876	3106	1886	560	948	101	240	8	3	0	0	0	0	0	0	0	0	0	0	14711		Bacteria	Verrucomicrobia	Verrucomicrobiae	Verrucomicrobiales	Verrucomicrobiaceae	Unassigned	Unassigned
ASV_8	0	0	0	0	0	0	0	0	0	0	0	0	0	0	0	0	1	466	96	2334	1602	1810	2451	294	1095	720	1614	2084	14567		Bacteria	Verrucomicrobia	Spartobacteria	Unassigned	Unassigned	Spartobacteria_genera_incertae_sedis	Unassigned
ASV_14	0	1	0	0	1	1	0	1	4	0	0	2	0	0	0	1	270	2004	516	520	1133	703	1527	1746	2630	1769	724	946	14499		Bacteria	Verrucomicrobia	Spartobacteria	Unassigned	Unassigned	Spartobacteria_genera_incertae_sedis	Unassigned
ASV_11	0	0	0	0	0	0	0	0	0	0	0	0	0	0	0	0	205	3762	701	2632	1409	463	1492	334	825	527	940	717	14007		Bacteria	Verrucomicrobia	Spartobacteria	Unassigned	Unassigned	Spartobacteria_genera_incertae_sedis	Unassigned
ASV_10	0	0	0	0	0	0	0	0	0	0	0	0	0	0	0	0	4	326	106	1953	1200	1975	3563	324	1113	828	1051	1300	13743		Bacteria	Verrucomicrobia	Spartobacteria	Unassigned	Unassigned	Spartobacteria_genera_incertae_sedis	Unassigned
ASV_12	0	0	0	0	0	3	0	0	0	0	0	0	0	0	3219	6538	1650	1657	173	0	0	0	0	0	0	0	0	0	13240		Bacteria	Planctomycetes	Planctomycetia	Planctomycetales	Planctomycetaceae	Zavarzinella	Zavarzinella_formosa
ASV_15	0	4	5780	4	9	4	0	0	157	875	16	143	3394	16	1	1354	7	1	4	0	5	4	0	5	1	5	1	5	11795		Bacteria	Proteobacteria	Betaproteobacteria	Burkholderiales	Comamonadaceae	Limnohabitans	Limnohabitans_planktonicus
ASV_19	2	17	2939	76	45	79	5	0	63	188	15	45	1189	19	2	1603	12	9	75	199	415	77	230	1636	275	517	234	479	10445		Bacteria	Proteobacteria	Betaproteobacteria	Burkholderiales	Comamonadaceae	Limnohabitans	Limnohabitans_planktonicus
ASV_18	211	0	508	41	53	67	6	0	20	5724	288	88	203	1942	194	689	35	5	4	0	0	0	0	0	1	0	0	0	10079		Bacteria	Proteobacteria	Alphaproteobacteria	Sphingomonadales	Sphingomonadaceae	Sphingorhabdus	Sphingorhabdus_planktonica
ASV_20	0	0	1	0	0	0	0	0	0	0	0	0	0	0	0	0	16	180	88	39	1638	20	345	1888	1206	2901	1336	270	9928		Bacteria	Actinobacteria	Actinobacteria	Acidimicrobiales	Acidimicrobiaceae	Ilumatobacter	Unassigned
ASV_21	0	0	0	0	1	0	0	0	0	0	0	0	0	0	0	0	323	2680	1000	918	377	246	544	253	826	1217	1040	472	9897		Bacteria	Verrucomicrobia	Spartobacteria	Unassigned	Unassigned	Spartobacteria_genera_incertae_sedis	Unassigned
ASV_17	0	0	0	0	0	1	0	0	0	0	0	0	0	0	6894	1580	782	496	36	0	0	0	0	0	0	0	0	0	9789		Bacteria	Planctomycetes	Planctomycetia	Planctomycetales	Planctomycetaceae	Unassigned	Unassigned
ASV_16	0	0	0	1	0	5	2	6	4	2	4	6	2	1	0	0	9455	0	0	1	0	283	2	0	0	0	0	0	9774		Bacteria	Candidatus_Saccharibacteria	Unassigned	Unassigned	Unassigned	Saccharibacteria_genera_incertae_sedis	Unassigned
ASV_22	728	5675	19	27	38	904	9	16	17	568	58	77	47	73	75	38	48	30	23	60	59	9	35	289	82	1	0	0	9005		Bacteria	Proteobacteria	Gammaproteobacteria	Pseudomonadales	Pseudomonadaceae	Pseudomonas	Unassigned
ASV_24	0	0	0	117	104	19	43	1497	102	12	324	175	25	176	2703	293	2882	77	250	0	1	0	0	0	0	0	0	0	8800		Bacteria	Verrucomicrobia	Verrucomicrobiae	Verrucomicrobiales	Verrucomicrobiaceae	Haloferula	Haloferula_helveola
ASV_23	0	0	1	0	0	0	0	1	0	0	0	0	0	0	1	0	187	2063	730	1642	520	396	203	45	176	116	1010	1481	8572		Bacteria	Planctomycetes	Planctomycetia	Planctomycetales	Planctomycetaceae	Rhodopirellula	Rhodopirellula_rosea
ASV_28	0	0	0	3	0	5	10	93	41	321	67	96	256	1860	349	3707	1066	421	147	6	0	3	1	0	4	0	11	22	8489		Bacteria	Verrucomicrobia	Verrucomicrobiae	Verrucomicrobiales	Verrucomicrobiaceae	Unassigned	Unassigned
ASV_29	0	0	1	2	1	0	1	1	0	0	2	1	0	1	1	0	65	1181	135	329	724	428	918	596	1166	1152	686	670	8061		Bacteria	Verrucomicrobia	Spartobacteria	Unassigned	Unassigned	Spartobacteria_genera_incertae_sedis	Unassigned
ASV_26	0	0	0	0	0	0	0	0	0	0	0	0	0	0	0	0	443	53	2582	119	446	39	799	2378	413	127	208	278	7885		Bacteria	Proteobacteria	Alphaproteobacteria	Unassigned	SAR11	Candidatus_Pelagibacter	Unassigned
ASV_27	0	0	0	0	0	0	0	0	0	0	0	0	0	0	0	0	331	47	2274	106	319	47	1085	2598	409	171	145	173	7705		Bacteria	Proteobacteria	Alphaproteobacteria	Unassigned	Unassigned	Unassigned	Unassigned
ASV_25	2	0	0	15	3	9	2	8	6	6	15	17	2	2	3	1	1	29	1	8	0	7502	21	0	1	0	8	0	7662		Bacteria	Candidatus_Saccharibacteria	Unassigned	Unassigned	Unassigned	Saccharibacteria_genera_incertae_sedis	Unassigned
ASV_31	0	0	0	3	0	1	0	2	1	0	1	2	0	2	1	0	68	749	111	281	477	515	1240	655	1101	1185	467	429	7291		Bacteria	Verrucomicrobia	Spartobacteria	Unassigned	Unassigned	Spartobacteria_genera_incertae_sedis	Unassigned
ASV_30	0	0	0	0	0	0	0	0	0	0	0	0	0	0	0	0	147	1900	482	1428	394	248	135	54	156	132	806	1023	6905		Bacteria	Planctomycetes	Planctomycetia	Planctomycetales	Planctomycetaceae	Rhodopirellula	Rhodopirellula_rosea
ASV_32	3	0	1	79	57	47	39	1431	73	27	184	200	13	161	1361	210	2276	59	215	1	0	1	0	0	0	0	0	1	6439		Bacteria	Verrucomicrobia	Verrucomicrobiae	Verrucomicrobiales	Verrucomicrobiaceae	Unassigned	Unassigned
ASV_33	1330	370	35	631	710	1140	3	0	181	540	305	142	223	531	185	46	2	1	2	4	7	0	1	13	1	0	1	10	6414		Bacteria	Proteobacteria	Betaproteobacteria	Burkholderiales	Comamonadaceae	Polaromonas	Polaromonas_hydrogenivorans
ASV_34	0	0	0	0	0	1	0	0	0	0	0	0	0	0	3147	1239	592	314	29	0	0	0	0	0	0	0	0	0	5322		Bacteria	Planctomycetes	Planctomycetia	Planctomycetales	Planctomycetaceae	Zavarzinella	Zavarzinella_formosa
ASV_35	0	0	0	0	0	0	0	0	0	0	0	0	0	0	4044	441	304	91	14	0	0	0	0	0	0	0	0	0	4894		Bacteria	Planctomycetes	Planctomycetia	Planctomycetales	Planctomycetaceae	Unassigned	Unassigned
ASV_39	0	0	0	0	0	1	0	0	1	1	0	0	0	1	1	2	174	557	210	91	468	264	404	680	953	478	208	398	4892		Bacteria	Verrucomicrobia	Spartobacteria	Unassigned	Unassigned	Spartobacteria_genera_incertae_sedis	Unassigned
ASV_38	1	0	2	14	21	0	6	6	6	0	9	3	1	2	1	3	52	551	144	153	568	108	288	562	897	555	366	509	4828		Bacteria	Verrucomicrobia	Spartobacteria	Unassigned	Unassigned	Spartobacteria_genera_incertae_sedis	Unassigned
ASV_5895	3	0	0	266	91	21	30	963	122	94	399	360	87	401	273	408	552	264	189	1	0	0	0	0	0	0	1	1	4526		Bacteria	Verrucomicrobia	Verrucomicrobiae	Verrucomicrobiales	Verrucomicrobiaceae	Luteolibacter	Luteolibacter_yonseiensis
ASV_36	0	0	0	0	0	0	0	1	1	0	1	1	0	0	1	0	4432	0	0	0	0	81	1	0	0	0	0	0	4519		Bacteria	Candidatus_Saccharibacteria	Unassigned	Unassigned	Unassigned	Saccharibacteria_genera_incertae_sedis	Unassigned
ASV_37	0	0	0	0	0	0	0	0	1	0	0	0	0	0	0	0	3	82	46	454	548	749	880	123	447	196	348	498	4375		Bacteria	Verrucomicrobia	Spartobacteria	Unassigned	Unassigned	Spartobacteria_genera_incertae_sedis	Unassigned
ASV_41	0	0	2	15	9	6	2	4	6	0	5	5	0	6	0	6	39	378	142	107	404	125	394	620	869	588	266	277	4275		Bacteria	Verrucomicrobia	Spartobacteria	Unassigned	Unassigned	Spartobacteria_genera_incertae_sedis	Unassigned
ASV_45	13	2	1	752	758	163	60	268	253	35	758	417	63	216	220	59	5	1	1	0	0	0	0	0	0	0	0	1	4046		Bacteria	Verrucomicrobia	Verrucomicrobiae	Verrucomicrobiales	Verrucomicrobiaceae	Unassigned	Unassigned
ASV_46	8	2	3080	6	12	5	0	1	81	69	8	38	438	18	3	231	3	0	0	0	1	0	0	5	0	0	0	1	4010		Bacteria	Proteobacteria	Betaproteobacteria	Burkholderiales	Comamonadaceae	Unassigned	Unassigned
ASV_42	0	0	0	29	23	7	13	568	37	2	56	68	0	39	1672	75	1235	19	96	1	0	0	0	0	0	0	0	0	3940		Bacteria	Verrucomicrobia	Verrucomicrobiae	Verrucomicrobiales	Verrucomicrobiaceae	Haloferula	Unassigned
ASV_44	0	0	0	0	0	0	0	0	0	0	0	0	0	0	0	0	92	1098	160	396	362	172	251	165	166	161	233	583	3839		Bacteria	Verrucomicrobia	Spartobacteria	Unassigned	Unassigned	Spartobacteria_genera_incertae_sedis	Unassigned
ASV_40	0	0	0	1	1	0	0	0	1	1	1	1	0	0	1	0	3633	0	0	0	0	118	0	0	0	0	0	0	3758		Bacteria	Candidatus_Saccharibacteria	Unassigned	Unassigned	Unassigned	Saccharibacteria_genera_incertae_sedis	Unassigned
ASV_43	0	0	0	0	0	0	1	0	1	0	0	7	22	2	2	2802	820	44	55	0	0	0	0	0	0	0	0	0	3756		Bacteria	Armatimonadetes	Armatimonadia	Armatimonadales	Armatimonadaceae	Armatimonas/Armatimonadetes_gp1	Unassigned
ASV_50	7	4	3051	4	17	7	0	0	68	87	10	44	160	10	2	185	4	0	0	0	0	0	0	4	0	0	0	0	3664		Bacteria	Proteobacteria	Betaproteobacteria	Burkholderiales	Comamonadaceae	Limnohabitans	Unassigned
ASV_47	0	0	0	0	0	0	0	0	0	0	0	0	0	0	0	0	6	59	20	9	430	15	60	1058	269	942	332	214	3414		Bacteria	Actinobacteria	Actinobacteria	Acidimicrobiales	Acidimicrobiaceae	Ilumatobacter	Ilumatobacter_fluminis
ASV_49	1146	159	29	297	373	329	4	1	78	245	162	87	104	224	120	22	1	0	2	13	9	0	1	1	0	0	0	4	3411		Bacteria	Proteobacteria	Betaproteobacteria	Burkholderiales	Comamonadaceae	Polaromonas	Polaromonas_jejuensis
ASV_61	0	0	0	0	0	0	0	0	0	0	0	0	0	0	0	0	26	308	387	212	30	157	53	3	316	1811	77	5	3385		Unassigned	Unassigned	Unassigned	Unassigned	Unassigned	Unassigned	Unassigned
ASV_52	1	2	863	16	47	10	3	0	19	8	4	9	114	7	1	411	9	4	29	40	119	26	40	866	66	166	75	364	3319		Bacteria	Proteobacteria	Betaproteobacteria	Burkholderiales	Comamonadaceae	Limnohabitans	Limnohabitans_planktonicus
ASV_48	182	2198	3	7	13	327	8	4	5	206	30	20	15	28	30	8	20	15	4	15	19	2	11	83	30	0	0	0	3283		Bacteria	Proteobacteria	Gammaproteobacteria	Enterobacteriales	Enterobacteriaceae	Unassigned	Unassigned
ASV_51	0	0	0	0	0	0	0	0	0	0	0	0	0	0	0	0	9	40	14	2	333	9	96	1198	241	962	216	135	3255		Bacteria	Actinobacteria	Actinobacteria	Acidimicrobiales	Acidimicrobiaceae	Ilumatobacter	Ilumatobacter_fluminis
ASV_68	41	2	1423	41	198	94	6	19	116	160	21	69	770	15	0	175	3	0	0	0	0	0	0	0	0	0	0	0	3153		Bacteria	Proteobacteria	Betaproteobacteria	Burkholderiales	Comamonadaceae	Variovorax	Variovorax_boronicumulans
ASV_55	0	0	0	0	0	0	0	0	0	0	0	0	0	0	0	0	74	785	143	304	280	180	339	197	158	171	143	347	3121		Bacteria	Verrucomicrobia	Spartobacteria	Unassigned	Unassigned	Spartobacteria_genera_incertae_sedis	Unassigned
ASV_57	5	4	917	12	20	18	4	0	18	16	2	11	46	2	0	279	5	4	26	32	77	28	67	987	82	155	23	223	3063		Bacteria	Proteobacteria	Betaproteobacteria	Burkholderiales	Comamonadaceae	Limnohabitans	Limnohabitans_planktonicus
ASV_60	4	0	2	4	6	2	2	8	0	18	13	6	31	8	0	4	11	43	365	38	336	7	60	1389	236	71	168	178	3010		Bacteria	Verrucomicrobia	Verrucomicrobiae	Verrucomicrobiales	Verrucomicrobiaceae	Luteolibacter	Luteolibacter_yonseiensis
ASV_54	1	0	0	0	0	0	0	1	0	0	0	0	0	0	0	0	80	672	200	252	149	134	30	25	52	35	253	1093	2977		Bacteria	Planctomycetes	Planctomycetia	Planctomycetales	Planctomycetaceae	Rhodopirellula	Rhodopirellula_rosea
ASV_64	7	7	2	475	425	248	55	269	250	53	440	416	16	159	102	42	3	1	0	0	0	0	0	0	0	0	0	0	2970		Bacteria	Verrucomicrobia	Verrucomicrobiae	Verrucomicrobiales	Verrucomicrobiaceae	Unassigned	Unassigned
ASV_1152	0	1	0	0	0	0	0	0	0	0	0	0	0	0	0	0	40	793	129	192	162	134	161	114	286	505	295	157	2969		Bacteria	Verrucomicrobia	Spartobacteria	Unassigned	Unassigned	Spartobacteria_genera_incertae_sedis	Unassigned
ASV_53	3	0	0	3	3	4	0	3	2	0	3	4	0	1	1	2	1	4	0	1	0	2882	8	1	0	0	1	0	2927		Bacteria	Candidatus_Saccharibacteria	Unassigned	Unassigned	Unassigned	Saccharibacteria_genera_incertae_sedis	Unassigned
ASV_70	0	0	0	3	2	0	1	20	10	17	13	27	16	444	698	942	503	128	39	0	0	3	0	0	0	1	4	12	2883		Bacteria	Verrucomicrobia	Verrucomicrobiae	Verrucomicrobiales	Verrucomicrobiaceae	Unassigned	Unassigned
ASV_66	59	2	7	4	0	5	0	2	1	1990	14	17	35	35	365	48	1	1	5	11	0	2	16	17	0	13	15	214	2879		Bacteria	Firmicutes	Bacilli	Bacillales	Planococcaceae	Unassigned	Unassigned
ASV_62	33	0	2	0	0	12	0	0	0	78	0	0	0	5	58	12	0	0	2	2564	57	1	7	0	0	9	0	0	2840		Bacteria	Firmicutes	Bacilli	Bacillales	Planococcaceae	Unassigned	Unassigned
ASV_58	0	0	0	0	0	0	0	0	0	0	0	0	0	0	0	0	175	13	957	24	144	7	240	938	139	37	44	70	2788		Bacteria	Proteobacteria	Alphaproteobacteria	Unassigned	Unassigned	Unassigned	Unassigned
ASV_56	0	0	0	5	2	0	1	12	2	0	4	2	0	1	2	0	0	11	0	0	0	2737	2	0	0	0	2	0	2783		Bacteria	Candidatus_Saccharibacteria	Unassigned	Unassigned	Unassigned	Saccharibacteria_genera_incertae_sedis	Unassigned
ASV_63	0	0	0	0	0	0	0	0	0	0	0	0	0	0	0	0	160	717	215	149	84	86	81	147	150	361	265	358	2773		Bacteria	Verrucomicrobia	Spartobacteria	Unassigned	Unassigned	Spartobacteria_genera_incertae_sedis	Unassigned
ASV_71	0	0	0	10	17	9	8	6	38	89	63	97	41	53	0	44	82	408	1520	10	4	49	2	0	0	5	63	137	2755		Bacteria	Verrucomicrobia	Verrucomicrobiae	Verrucomicrobiales	Verrucomicrobiaceae	Unassigned	Unassigned
ASV_59	0	0	0	0	0	0	0	0	0	0	0	0	0	0	0	0	222	591	392	252	181	68	170	89	328	81	163	177	2714		Bacteria	Chloroflexi	Unassigned	Unassigned	Unassigned	Unassigned	Unassigned
ASV_1054	0	0	0	0	0	0	0	0	0	0	0	0	0	0	0	0	33	730	129	146	153	110	139	116	246	433	240	167	2642		Bacteria	Verrucomicrobia	Spartobacteria	Unassigned	Unassigned	Spartobacteria_genera_incertae_sedis	Unassigned
ASV_65	835	89	13	145	633	181	5	0	63	30	76	26	21	98	350	5	0	0	0	0	2	1	0	4	0	0	0	14	2591		Bacteria	Proteobacteria	Betaproteobacteria	Burkholderiales	Comamonadaceae	Polaromonas	Polaromonas_hydrogenivorans
ASV_69	3	1	1772	1	10	1	0	0	46	26	4	30	313	5	1	343	4	0	2	0	2	1	0	2	0	0	0	2	2569		Bacteria	Proteobacteria	Betaproteobacteria	Burkholderiales	Comamonadaceae	Limnohabitans	Unassigned
ASV_67	391	34	153	37	43	866	4	6	16	27	144	7	29	501	218	6	2	0	0	0	0	0	0	0	0	0	0	0	2484		Bacteria	Bacteroidetes	Flavobacteriia	Flavobacteriales	Flavobacteriaceae	Flavobacterium	Unassigned
ASV_72	0	0	0	4	3	8	0	0	0	1	2	4	0	2	0	0	0	2	0	0	0	8	0	1	1	0	2403	0	2439		Bacteria	Candidatus_Saccharibacteria	Unassigned	Unassigned	Unassigned	Saccharibacteria_genera_incertae_sedis	Unassigned
ASV_80	0	0	0	0	1	1	0	1	0	0	0	0	0	0	0	0	35	222	59	61	228	202	288	263	397	343	145	176	2422		Bacteria	Verrucomicrobia	Spartobacteria	Unassigned	Unassigned	Spartobacteria_genera_incertae_sedis	Unassigned
ASV_91	3	206	0	170	110	239	227	64	133	47	451	320	129	240	16	62	2	2	0	0	0	0	0	0	0	0	0	0	2421		Bacteria	Actinobacteria	Actinobacteria	Unassigned	Unassigned	Unassigned	Unassigned
ASV_73	449	1278	7	9	28	220	6	17	4	39	6	13	0	11	74	4	12	7	4	8	10	2	6	175	21	0	0	0	2410		Bacteria	Proteobacteria	Gammaproteobacteria	Pseudomonadales	Pseudomonadaceae	Pseudomonas	Unassigned
ASV_78	56	30	12	335	516	986	7	0	37	70	105	39	107	65	5	18	0	0	0	0	0	0	0	0	0	0	0	0	2388		Bacteria	Proteobacteria	Betaproteobacteria	Burkholderiales	Comamonadaceae	Polaromonas	Polaromonas_aquatica
ASV_77	53	11	5	207	651	640	24	0	154	177	65	49	252	46	5	21	0	0	0	0	0	0	0	0	0	0	0	0	2360		Bacteria	Proteobacteria	Betaproteobacteria	Burkholderiales	Comamonadaceae	Variovorax	Variovorax_guangxiensis
ASV_75	0	1	1793	0	5	0	0	1	50	58	3	28	101	7	4	268	3	0	1	0	1	4	0	2	0	0	0	1	2331		Bacteria	Proteobacteria	Betaproteobacteria	Burkholderiales	Comamonadaceae	Limnohabitans	Limnohabitans_planktonicus
ASV_74	0	0	0	0	0	0	0	1	0	0	0	0	0	0	0	0	69	451	186	227	120	178	64	27	40	32	155	762	2312		Bacteria	Planctomycetes	Planctomycetia	Planctomycetales	Planctomycetaceae	Rhodopirellula	Rhodopirellula_rosea
ASV_81	0	0	0	0	0	0	0	0	0	0	0	0	0	0	0	0	99	536	204	125	68	88	141	150	167	353	166	203	2300		Bacteria	Verrucomicrobia	Spartobacteria	Unassigned	Unassigned	Spartobacteria_genera_incertae_sedis	Unassigned
ASV_79	399	1238	3	5	41	126	7	9	6	19	12	14	6	18	136	5	19	10	4	11	16	4	3	137	19	0	0	2	2269		Bacteria	Proteobacteria	Gammaproteobacteria	Pseudomonadales	Pseudomonadaceae	Pseudomonas	Unassigned
ASV_76	0	0	0	0	0	0	0	0	0	0	0	0	0	0	0	0	68	555	120	187	106	104	26	31	50	43	211	750	2251		Bacteria	Planctomycetes	Planctomycetia	Planctomycetales	Planctomycetaceae	Rhodopirellula	Unassigned
ASV_82	412	21	2	271	169	744	18	0	24	101	122	22	10	217	48	8	0	0	0	0	0	0	0	0	0	0	0	0	2189		Bacteria	Proteobacteria	Alphaproteobacteria	Sphingomonadales	Sphingomonadaceae	Unassigned	Unassigned
ASV_88	1	0	0	2	4	1	1	24	9	11	7	28	10	406	386	757	389	87	38	0	2	1	0	0	1	0	3	6	2174		Bacteria	Verrucomicrobia	Verrucomicrobiae	Verrucomicrobiales	Verrucomicrobiaceae	Unassigned	Unassigned
ASV_83	850	84	11	81	359	284	3	0	50	26	31	37	5	86	211	10	0	0	0	1	0	0	0	3	1	1	0	2	2136		Bacteria	Proteobacteria	Betaproteobacteria	Burkholderiales	Comamonadaceae	Polaromonas	Polaromonas_hydrogenivorans
ASV_2016	0	1	1974	0	0	0	0	0	2	33	0	1	36	3	0	49	5	0	0	0	0	0	0	0	0	0	0	0	2104		Bacteria	Actinobacteria	Actinobacteria	Actinomycetales	Microbacteriaceae	Rhodoluna	Rhodoluna_lacicola
ASV_87	1	40	24	0	0	0	0	0	0	126	0	4	5	1	34	21	37	52	32	0	121	161	0	0	10	1	337	1088	2095		Bacteria	Firmicutes	Bacilli	Bacillales	Planococcaceae	Paenisporosarcina	Paenisporosarcina_macmurdoensis
ASV_95	149	45	7	140	44	208	43	115	20	545	173	38	370	80	3	8	1	1	21	0	0	0	2	1	0	0	1	1	2016		Bacteria	Verrucomicrobia	Verrucomicrobiae	Verrucomicrobiales	Verrucomicrobiaceae	Luteolibacter	Luteolibacter_luojiensis
ASV_84	0	0	0	0	0	0	0	0	0	0	0	2	0	0	0	0	1954	0	0	0	0	27	0	0	0	0	0	0	1983		Bacteria	Candidatus_Saccharibacteria	Unassigned	Unassigned	Unassigned	Saccharibacteria_genera_incertae_sedis	Unassigned
ASV_86	154	937	2	11	1	171	3	4	2	114	17	5	15	22	13	5	3	8	7	12	60	11	11	309	76	0	0	0	1973		Bacteria	Actinobacteria	Actinobacteria	Actinomycetales	Nocardiaceae	Rhodococcus	Unassigned
ASV_85	0	1	1309	0	0	0	0	1	8	232	1	11	282	7	0	103	2	0	0	0	0	1	0	0	0	1	0	0	1959		Bacteria	Proteobacteria	Betaproteobacteria	Burkholderiales	Burkholderiaceae	Polynucleobacter	Polynucleobacter_necessarius_subsp._asymbioticus
ASV_942	0	0	0	0	0	0	0	0	0	0	0	0	0	0	0	0	31	600	102	137	105	91	88	90	165	230	167	141	1947		Bacteria	Verrucomicrobia	Spartobacteria	Unassigned	Unassigned	Terrimicrobium	Terrimicrobium_sacchariphilum
ASV_201	319	162	0	170	25	35	10	29	2	73	156	28	7	456	409	0	0	0	0	0	0	0	0	0	0	0	0	0	1881		Bacteria	Bacteroidetes	Cytophagia	Cytophagales	Cytophagaceae	Hymenobacter	Hymenobacter_yonginensis
ASV_105	107	0	53	41	51	53	6	0	11	658	40	28	147	235	39	328	24	2	9	0	2	0	0	2	2	0	1	1	1840		Bacteria	Proteobacteria	Alphaproteobacteria	Sphingomonadales	Sphingomonadaceae	Sphingorhabdus	Sphingorhabdus_wooponensis
ASV_93	0	0	0	1	0	0	0	0	1	1	1	1	1	1	0	1	72	336	294	99	91	50	86	17	115	127	309	222	1826		Bacteria	Planctomycetes	Planctomycetia	Planctomycetales	Planctomycetaceae	Unassigned	Unassigned
ASV_90	38	8	0	378	161	813	72	0	18	54	93	6	13	127	22	0	0	0	0	0	0	0	0	0	0	0	0	0	1803		Bacteria	Bacteroidetes	Sphingobacteriia	Sphingobacteriales	Chitinophagaceae	Ferruginibacter	Unassigned
ASV_94	121	0	131	13	40	8	2	0	6	270	76	10	16	486	395	172	11	3	2	0	0	0	0	0	0	0	0	0	1762		Bacteria	Proteobacteria	Alphaproteobacteria	Sphingomonadales	Sphingomonadaceae	Sphingorhabdus	Sphingorhabdus_planktonica
ASV_89	0	0	0	0	0	0	0	0	0	0	0	0	0	0	0	0	56	389	118	175	72	111	30	38	45	44	137	533	1748		Bacteria	Planctomycetes	Planctomycetia	Planctomycetales	Planctomycetaceae	Rhodopirellula	Rhodopirellula_rosea
ASV_756	0	0	0	0	0	0	0	0	0	0	0	0	0	0	0	0	20	577	93	125	98	67	72	69	158	186	120	115	1700		Bacteria	Verrucomicrobia	Spartobacteria	Unassigned	Unassigned	Spartobacteria_genera_incertae_sedis	Unassigned
ASV_92	0	0	0	0	0	0	0	0	0	0	0	0	0	0	0	0	182	321	320	160	73	21	54	76	157	24	154	152	1694		Bacteria	Chloroflexi	Caldilineae	Caldilineales	Caldilineaceae	Unassigned	Unassigned
ASV_99	38	20	49	87	401	537	4	0	55	98	52	38	174	46	12	52	0	0	0	0	2	1	1	1	1	0	1	2	1672		Bacteria	Proteobacteria	Betaproteobacteria	Burkholderiales	Comamonadaceae	Unassigned	Unassigned
ASV_96	641	30	5	76	320	44	1	0	31	11	42	15	8	55	303	10	1	0	0	0	2	0	0	1	0	0	0	6	1602		Bacteria	Proteobacteria	Betaproteobacteria	Burkholderiales	Comamonadaceae	Polaromonas	Unassigned
ASV_101	4	2	2	4	2	4	2	15	0	1244	6	11	8	2	221	5	4	6	3	0	0	1	7	0	0	49	0	0	1602		Bacteria	Firmicutes	Bacilli	Bacillales	Bacillales_Incertae_Sedis_XII	Exiguobacterium	Exiguobacterium_artemiae
ASV_110	1	0	3	0	0	0	1	2	0	1443	4	9	6	7	97	1	1	2	1	15	3	1	3	0	0	0	0	2	1602		Bacteria	Firmicutes	Bacilli	Bacillales	Planococcaceae	Planomicrobium	Unassigned
ASV_97	2	4	635	0	3	16	2	2	68	53	2	38	575	15	1	144	0	0	0	1	2	0	0	3	0	1	0	0	1567		Bacteria	Proteobacteria	Betaproteobacteria	Burkholderiales	Comamonadaceae	Unassigned	Unassigned
ASV_100	353	5	0	211	100	412	29	0	13	86	101	12	7	194	25	5	0	0	0	0	0	0	0	0	0	0	0	0	1553		Bacteria	Proteobacteria	Alphaproteobacteria	Sphingomonadales	Sphingomonadaceae	Unassigned	Unassigned
ASV_98	143	0	144	4	32	17	3	0	7	375	49	15	12	366	174	137	13	2	1	0	0	0	0	0	0	0	0	0	1494		Bacteria	Proteobacteria	Alphaproteobacteria	Sphingomonadales	Sphingomonadaceae	Sphingorhabdus	Sphingorhabdus_planktonica
ASV_5951	0	6	0	5	12	0	2	23	27	23	34	66	43	147	11	138	110	433	241	1	5	27	2	2	1	2	36	89	1486		Bacteria	Verrucomicrobia	Verrucomicrobiae	Verrucomicrobiales	Verrucomicrobiaceae	Verrucomicrobium	Verrucomicrobium_spinosum
ASV_106	0	2	16	0	0	32	0	1	78	130	10	84	567	19	3	491	7	2	7	2	1	0	1	2	4	3	0	0	1462		Bacteria	Bacteroidetes	Cytophagia	Cytophagales	Cytophagaceae	Pseudarcicella	Pseudarcicella_hirudinis
ASV_158	2	86	0	90	101	402	93	70	118	45	133	124	69	50	4	61	0	1	0	0	0	0	0	0	0	0	0	0	1449		Bacteria	Acidobacteria	Acidobacteria_Gp6	Unassigned	Unassigned	Gp6	Unassigned
ASV_104	0	0	0	3	5	0	3	1	1	0	2	3	0	0	2	2	22	88	49	26	153	45	101	250	312	158	99	96	1421		Bacteria	Verrucomicrobia	Spartobacteria	Unassigned	Unassigned	Spartobacteria_genera_incertae_sedis	Unassigned
ASV_1353	5	4	343	3	3	3	0	0	4	677	14	20	42	18	1	246	26	0	2	0	0	0	0	2	0	0	0	0	1413		Bacteria	Proteobacteria	Alphaproteobacteria	Rhodobacterales	Rhodobacteraceae	Unassigned	Unassigned
ASV_190	0	0	5	22	1	16	6	85	335	123	172	277	133	154	3	54	16	3	3	0	0	0	0	0	0	0	0	0	1408		Bacteria	Acidobacteria	Acidobacteria_Gp6	Unassigned	Unassigned	Gp6	Unassigned
ASV_117	11	41	244	0	1	25	0	3	0	968	4	1	1	10	78	0	0	0	1	0	12	0	0	0	0	3	0	0	1403		Bacteria	Proteobacteria	Gammaproteobacteria	Pseudomonadales	Moraxellaceae	Psychrobacter	Psychrobacter_pulmonis
ASV_122	39	4	4	1	1	231	1	15	3	675	7	8	1	12	37	5	1	0	3	281	15	0	6	0	0	0	0	0	1350		Bacteria	Firmicutes	Bacilli	Bacillales	Planococcaceae	Unassigned	Unassigned
ASV_111	1151	0	0	0	8	49	0	0	0	0	0	0	0	5	0	7	11	0	0	5	5	0	17	21	21	25	0	5	1330		Bacteria	Proteobacteria	Alphaproteobacteria	Sphingomonadales	Sphingomonadaceae	Blastomonas	Blastomonas_natatoria
ASV_103	698	27	13	44	179	85	0	0	23	14	19	17	6	38	129	5	1	0	0	1	0	0	0	0	0	0	0	3	1302		Bacteria	Proteobacteria	Betaproteobacteria	Burkholderiales	Comamonadaceae	Polaromonas	Unassigned
ASV_115	0	9	0	0	0	0	0	0	5	4	4	47	227	48	11	896	23	8	5	0	0	0	0	0	0	0	0	0	1287		Bacteria	Verrucomicrobia	Verrucomicrobiae	Verrucomicrobiales	Verrucomicrobiaceae	Prosthecobacter	Prosthecobacter_algae
ASV_4837	0	0	0	0	0	0	0	1	2	3	1	1	2	22	1	15	141	537	292	4	11	48	6	1	2	4	48	130	1272		Bacteria	Verrucomicrobia	Spartobacteria	Unassigned	Unassigned	Spartobacteria_genera_incertae_sedis	Unassigned
ASV_116	5	5	0	5	6	0	0	4	1	0	5	2	7	0	1	0	6	24	85	5	92	5	8	786	37	22	39	120	1270		Bacteria	Verrucomicrobia	Verrucomicrobiae	Verrucomicrobiales	Verrucomicrobiaceae	Luteolibacter	Luteolibacter_yonseiensis
ASV_154	0	4	0	0	0	0	0	0	0	11	0	0	1	0	0	0	1	0	1	428	0	0	0	0	0	0	0	824	1270		Bacteria	Firmicutes	Bacilli	Lactobacillales	Carnobacteriaceae	Carnobacterium	Carnobacterium_pleistocenium
ASV_114	9	5	0	0	4	0	1	3	2	0	1	3	0	1	3	0	3	7	81	7	62	3	10	879	33	21	27	86	1251		Bacteria	Verrucomicrobia	Verrucomicrobiae	Verrucomicrobiales	Verrucomicrobiaceae	Luteolibacter	Luteolibacter_yonseiensis
ASV_216	2	11	0	231	83	175	40	4	109	47	187	176	59	63	7	34	1	0	0	0	0	0	0	0	0	0	0	0	1229		Bacteria	Acidobacteria	Acidobacteria_Gp6	Unassigned	Unassigned	Gp6	Unassigned
ASV_4757	3	87	0	130	118	380	88	23	56	15	176	79	18	26	10	0	0	0	0	0	0	0	0	0	0	0	0	0	1209		Bacteria	Candidatus_Saccharibacteria	Unassigned	Unassigned	Unassigned	Saccharibacteria_genera_incertae_sedis	Unassigned
ASV_1083	0	0	0	13	20	2	4	40	33	62	52	109	76	293	92	382	12	4	5	0	0	0	0	0	0	0	0	0	1199		Bacteria	Verrucomicrobia	Verrucomicrobiae	Verrucomicrobiales	Verrucomicrobiaceae	Unassigned	Unassigned
ASV_129	0	0	0	0	1	0	0	9	6	2	3	7	2	127	465	299	213	24	13	0	0	1	0	0	1	0	0	4	1177		Bacteria	Verrucomicrobia	Verrucomicrobiae	Verrucomicrobiales	Verrucomicrobiaceae	Unassigned	Unassigned
ASV_113	0	0	0	0	2	0	0	0	0	0	0	0	0	0	972	0	200	0	0	0	0	0	0	0	0	0	0	0	1174		Bacteria	Planctomycetes	Planctomycetia	Planctomycetales	Planctomycetaceae	Unassigned	Unassigned
ASV_107	0	0	0	2	1	0	2	1	0	0	1	3	0	0	0	0	0	2	0	0	0	1151	1	0	0	0	2	0	1166		Bacteria	Candidatus_Saccharibacteria	Unassigned	Unassigned	Unassigned	Saccharibacteria_genera_incertae_sedis	Unassigned
ASV_131	0	14	10	0	0	0	0	0	0	2	0	1	0	0	61	6	16	19	6	0	36	56	0	0	3	0	75	854	1159		Bacteria	Firmicutes	Bacilli	Bacillales	Planococcaceae	Paenisporosarcina	Paenisporosarcina_macmurdoensis
ASV_119	0	0	0	0	0	0	0	0	0	0	0	0	0	0	0	0	42	309	134	115	59	27	28	35	110	119	99	77	1154		Bacteria	Chloroflexi	Caldilineae	Caldilineales	Caldilineaceae	Caldilinea	Caldilinea_tarbellica
ASV_1267	0	0	819	1	0	0	1	0	5	41	0	4	201	0	0	56	0	0	0	0	1	1	0	6	3	0	0	1	1140		Bacteria	Proteobacteria	Betaproteobacteria	Burkholderiales	Comamonadaceae	Unassigned	Unassigned
ASV_123	0	0	0	0	0	0	0	0	0	0	0	0	0	0	0	0	2	7	7	1	143	6	27	477	77	273	68	44	1132		Bacteria	Actinobacteria	Actinobacteria	Acidimicrobiales	Acidimicrobiaceae	Ilumatobacter	Ilumatobacter_fluminis
ASV_2617	0	11	0	138	53	8	8	7	108	92	183	259	79	113	9	59	2	1	1	0	0	0	0	0	0	0	0	0	1131		Bacteria	Verrucomicrobia	Verrucomicrobiae	Verrucomicrobiales	Verrucomicrobiaceae	Prosthecobacter	Unassigned
ASV_118	0	0	0	2	0	2	0	0	2	0	0	4	0	1	0	1	0	1	0	1	0	1086	9	4	0	0	1	0	1114		Bacteria	Candidatus_Saccharibacteria	Unassigned	Unassigned	Unassigned	Saccharibacteria_genera_incertae_sedis	Unassigned
ASV_128	47	30	1	117	182	571	1	1	15	38	12	6	61	19	1	0	0	0	0	0	0	0	0	0	0	0	0	0	1102		Bacteria	Proteobacteria	Betaproteobacteria	Burkholderiales	Comamonadaceae	Unassigned	Unassigned
ASV_136	23	0	2	1	0	1	0	1	2	111	2	2	2	11	707	8	0	1	3	4	0	2	6	8	1	3	4	194	1099		Bacteria	Firmicutes	Bacilli	Bacillales	Planococcaceae	Planomicrobium	Planomicrobium_mcmeekinii
ASV_120	225	4	41	6	55	134	2	2	3	1	28	0	4	114	474	2	0	0	0	0	0	0	0	0	0	0	0	0	1095		Bacteria	Bacteroidetes	Flavobacteriia	Flavobacteriales	Flavobacteriaceae	Flavobacterium	Unassigned
ASV_125	0	0	0	0	0	0	0	0	0	0	0	0	0	0	0	0	32	244	65	74	140	64	98	68	73	44	34	155	1091		Bacteria	Verrucomicrobia	Spartobacteria	Unassigned	Unassigned	Spartobacteria_genera_incertae_sedis	Unassigned
ASV_132	6	1	0	143	204	35	28	98	104	4	113	152	0	56	130	9	0	0	0	0	0	0	0	0	0	0	0	0	1083		Bacteria	Verrucomicrobia	Verrucomicrobiae	Verrucomicrobiales	Verrucomicrobiaceae	Unassigned	Unassigned
ASV_156	0	0	1	0	0	0	0	0	0	0	0	0	0	0	0	0	15	109	95	40	12	61	10	1	77	618	18	6	1063		Unassigned	Unassigned	Unassigned	Unassigned	Unassigned	Unassigned	Unassigned
ASV_220	1	29	0	64	68	91	69	0	228	43	155	129	56	73	1	45	0	0	0	0	0	0	0	0	0	0	0	0	1052		Bacteria	Acidobacteria	Acidobacteria_Gp6	Unassigned	Unassigned	Gp6	Unassigned
ASV_133	291	34	2	9	18	30	6	25	12	175	122	12	10	206	81	9	1	2	1	1	2	0	0	1	1	0	0	0	1051		Bacteria	Proteobacteria	Alphaproteobacteria	Caulobacterales	Caulobacteraceae	Brevundimonas	Unassigned
ASV_126	0	0	0	0	0	0	0	0	0	0	0	4	0	0	12	661	344	12	12	0	0	0	0	0	0	0	0	0	1045		Bacteria	Armatimonadetes	Armatimonadia	Armatimonadales	Armatimonadaceae	Armatimonas/Armatimonadetes_gp1	Unassigned
ASV_127	0	1	920	0	0	0	0	0	3	19	1	12	38	1	0	6	0	1	0	0	0	0	0	0	0	0	0	0	1002		Bacteria	Bacteroidetes	Flavobacteriia	Flavobacteriales	Flavobacteriaceae	Flavobacterium	Unassigned
ASV_170	0	0	1	0	0	0	0	0	3	27	10	19	10	26	245	482	88	52	17	0	0	0	0	0	0	0	0	0	980		Bacteria	Verrucomicrobia	Verrucomicrobiae	Verrucomicrobiales	Verrucomicrobiaceae	Unassigned	Unassigned
ASV_145	30	3	1	51	656	88	9	0	54	7	19	15	20	8	12	6	0	0	0	0	0	0	0	0	0	0	0	0	979		Bacteria	Proteobacteria	Betaproteobacteria	Burkholderiales	Comamonadaceae	Variovorax	Variovorax_guangxiensis
ASV_164	34	5	2	99	520	174	9	0	16	3	36	10	12	13	22	7	0	0	0	0	0	0	0	0	0	0	0	0	962		Bacteria	Proteobacteria	Betaproteobacteria	Burkholderiales	Comamonadaceae	Polaromonas	Polaromonas_aquatica
ASV_144	3	1	261	3	8	1	1	0	9	0	1	4	3	0	2	109	2	1	11	3	33	5	11	355	21	31	8	73	960		Bacteria	Proteobacteria	Betaproteobacteria	Burkholderiales	Comamonadaceae	Limnohabitans	Limnohabitans_planktonicus
ASV_161	4	4	785	0	3	2	3	0	26	10	2	13	15	7	2	77	1	0	0	0	0	0	0	2	0	0	0	0	956		Bacteria	Proteobacteria	Betaproteobacteria	Burkholderiales	Comamonadaceae	Limnohabitans	Unassigned
ASV_266	0	35	0	16	32	138	80	9	144	75	97	117	55	54	2	77	3	4	0	0	0	0	1	0	1	2	3	0	945		Bacteria	Acidobacteria	Acidobacteria_Gp6	Unassigned	Unassigned	Gp6	Unassigned
ASV_138	14	5	0	191	256	307	5	0	15	11	39	3	40	39	2	8	0	0	0	0	0	0	0	0	0	0	0	0	935		Bacteria	Proteobacteria	Betaproteobacteria	Burkholderiales	Comamonadaceae	Unassigned	Unassigned
ASV_151	2	4	1	0	0	0	1	0	1	44	1	4	0	0	7	2	9	11	4	14	113	129	0	0	0	29	291	267	934		Bacteria	Firmicutes	Bacilli	Bacillales	Planococcaceae	Paenisporosarcina	Paenisporosarcina_antarctica
ASV_137	0	0	0	0	0	0	0	0	0	0	0	0	0	0	511	0	418	0	0	0	0	0	0	0	0	0	0	0	929		Bacteria	Planctomycetes	Planctomycetia	Planctomycetales	Planctomycetaceae	Unassigned	Unassigned
ASV_141	0	0	1	0	0	0	0	0	0	100	2	3	18	9	3	68	18	9	22	20	42	17	42	238	73	127	59	41	912		Bacteria	Proteobacteria	Betaproteobacteria	Burkholderiales	Alcaligenaceae	Unassigned	Unassigned
ASV_157	0	0	0	0	0	0	0	0	0	0	0	0	0	0	0	0	78	312	145	102	23	8	38	20	36	37	77	36	912		Bacteria	Verrucomicrobia	Spartobacteria	Unassigned	Unassigned	Spartobacteria_genera_incertae_sedis	Unassigned
ASV_140	155	461	2	1	8	52	3	2	1	5	2	1	0	5	108	5	10	4	2	2	7	2	1	60	10	0	0	0	909		Bacteria	Proteobacteria	Gammaproteobacteria	Pseudomonadales	Pseudomonadaceae	Pseudomonas	Unassigned
ASV_163	2	81	3	94	19	123	23	11	43	159	133	97	34	36	2	37	4	2	0	0	0	0	0	0	0	0	0	0	903		Bacteria	Planctomycetes	Planctomycetia	Planctomycetales	Planctomycetaceae	Unassigned	Unassigned
ASV_142	0	0	2	0	0	8	0	0	6	38	0	6	185	6	2	620	22	2	4	1	0	0	0	0	0	0	0	0	902		Bacteria	Proteobacteria	Betaproteobacteria	Burkholderiales	Comamonadaceae	Comamonas	Comamonas_guangdongensis
ASV_146	240	16	44	1	33	221	2	1	3	2	23	0	2	110	198	0	0	0	0	0	0	0	0	0	0	0	0	0	896		Bacteria	Bacteroidetes	Flavobacteriia	Flavobacteriales	Flavobacteriaceae	Flavobacterium	Unassigned
ASV_186	0	0	0	0	0	0	0	0	0	0	0	0	0	0	0	0	5	58	72	33	2	78	9	4	67	560	4	1	893		Unassigned	Unassigned	Unassigned	Unassigned	Unassigned	Unassigned	Unassigned
ASV_171	1	19	0	172	90	314	15	1	24	6	106	66	25	38	6	7	0	0	0	0	0	0	0	0	0	0	0	0	890		Bacteria	Actinobacteria	Actinobacteria	Unassigned	Unassigned	Unassigned	Unassigned
ASV_149	310	37	5	30	140	49	1	0	16	4	13	12	0	30	221	4	0	0	0	0	0	0	0	2	0	0	0	3	877		Bacteria	Proteobacteria	Betaproteobacteria	Burkholderiales	Comamonadaceae	Polaromonas	Polaromonas_hydrogenivorans
ASV_150	114	554	2	0	4	70	2	1	4	12	4	3	0	5	22	1	5	1	8	0	1	2	2	49	3	0	0	0	869		Bacteria	Proteobacteria	Gammaproteobacteria	Enterobacteriales	Enterobacteriaceae	Serratia	Serratia_liquefaciens
ASV_148	0	0	0	2	0	0	3	7	3	0	3	8	1	1	2	1	0	0	759	0	0	0	0	0	0	0	78	0	868		Bacteria	Planctomycetes	Planctomycetia	Planctomycetales	Planctomycetaceae	Unassigned	Unassigned
ASV_698	67	0	53	81	239	76	0	0	48	94	16	21	117	38	4	12	0	0	0	0	0	0	0	0	0	0	0	1	867		Bacteria	Proteobacteria	Betaproteobacteria	Burkholderiales	Comamonadaceae	Unassigned	Unassigned
ASV_143	0	0	6	1	1	0	0	787	3	7	16	23	10	5	1	0	0	2	0	0	0	0	0	0	0	0	0	0	862		Bacteria	Unassigned	Unassigned	Unassigned	Unassigned	Unassigned	Unassigned
ASV_159	0	4	222	0	0	0	0	0	1	49	0	3	20	3	0	36	12	7	25	2	17	10	9	225	77	59	43	36	860		Bacteria	Actinobacteria	Actinobacteria	Actinomycetales	Microbacteriaceae	Unassigned	Unassigned
ASV_239	45	4	34	40	446	94	3	0	34	18	25	11	32	13	30	14	0	0	0	0	1	0	0	5	0	0	0	0	849		Bacteria	Proteobacteria	Betaproteobacteria	Burkholderiales	Comamonadaceae	Unassigned	Unassigned
ASV_155	87	520	0	1	15	50	3	1	5	8	4	6	1	10	59	3	2	3	3	2	7	1	0	46	6	0	0	0	843		Bacteria	Proteobacteria	Gammaproteobacteria	Enterobacteriales	Enterobacteriaceae	Serratia	Serratia_liquefaciens
ASV_153	0	0	0	0	0	0	0	0	1	0	0	1	0	2	3	507	305	6	11	0	0	0	0	0	0	0	0	0	836		Bacteria	Armatimonadetes	Armatimonadia	Armatimonadales	Armatimonadaceae	Armatimonas/Armatimonadetes_gp1	Unassigned
ASV_152	0	0	0	0	0	0	0	0	0	0	0	0	0	0	0	0	0	51	67	35	7	33	22	2	107	489	20	0	833		Unassigned	Unassigned	Unassigned	Unassigned	Unassigned	Unassigned	Unassigned
ASV_172	1	7	10	0	0	0	0	0	0	6	1	0	0	0	29	1	7	20	6	0	25	62	0	0	3	0	62	576	816		Bacteria	Firmicutes	Bacilli	Bacillales	Planococcaceae	Paenisporosarcina	Paenisporosarcina_macmurdoensis
ASV_283	1	18	1	66	36	40	13	17	106	45	101	107	68	46	2	135	2	5	0	0	0	0	0	0	0	0	0	0	809		Bacteria	Acidobacteria	Acidobacteria_Gp6	Unassigned	Unassigned	Gp6	Unassigned
ASV_160	0	0	0	0	0	0	0	792	0	0	8	4	0	0	0	0	0	1	0	0	0	0	0	0	0	0	0	0	805		Bacteria	Unassigned	Unassigned	Unassigned	Unassigned	Unassigned	Unassigned
ASV_180	751	0	0	0	1	12	1	0	0	0	0	0	0	1	0	1	6	0	0	0	0	0	3	16	6	5	0	0	803		Bacteria	Proteobacteria	Alphaproteobacteria	Sphingomonadales	Sphingomonadaceae	Blastomonas	Blastomonas_natatoria
ASV_763	1	146	1	77	30	176	52	38	36	28	73	95	19	22	3	3	0	0	0	0	0	0	0	0	0	0	0	0	800		Bacteria	Candidatus_Saccharibacteria	Unassigned	Unassigned	Unassigned	Saccharibacteria_genera_incertae_sedis	Unassigned
ASV_181	29	17	0	275	214	101	4	0	9	25	70	2	11	30	3	1	0	0	0	0	0	0	0	0	0	0	0	0	791		Bacteria	Bacteroidetes	Sphingobacteriia	Sphingobacteriales	Chitinophagaceae	Ferruginibacter	Unassigned
ASV_187	0	0	1	12	2	15	2	167	49	67	134	117	60	115	6	32	12	0	0	0	0	0	0	0	0	0	0	0	791		Bacteria	Actinobacteria	Actinobacteria	Unassigned	Unassigned	Unassigned	Unassigned
ASV_167	0	0	0	0	0	0	0	0	0	0	0	0	0	0	0	0	56	155	79	27	36	53	27	62	65	101	53	75	789		Bacteria	Verrucomicrobia	Spartobacteria	Unassigned	Unassigned	Spartobacteria_genera_incertae_sedis	Unassigned
ASV_179	0	11	0	86	61	122	127	0	91	16	122	71	27	44	4	2	0	0	0	0	0	0	0	0	0	0	0	0	784		Bacteria	Acidobacteria	Acidobacteria_Gp4	Unassigned	Unassigned	Gp4	Unassigned
ASV_162	0	0	0	0	0	0	0	0	0	0	0	0	0	0	0	0	30	119	83	47	40	57	9	11	15	8	60	297	776		Bacteria	Planctomycetes	Planctomycetia	Planctomycetales	Planctomycetaceae	Rhodopirellula	Unassigned
ASV_169	0	0	1	0	0	0	0	0	0	1	0	2	8	3	0	73	4	3	34	43	89	38	112	40	56	77	120	69	773		Bacteria	Bacteroidetes	Cytophagia	Cytophagales	Cyclobacteriaceae	Algoriphagus	Algoriphagus_aquatilis
ASV_292	1	13	0	114	54	46	49	1	97	32	107	84	33	94	4	43	1	0	0	0	0	0	0	0	0	0	0	0	773		Bacteria	Acidobacteria	Acidobacteria_Gp6	Unassigned	Unassigned	Gp6	Unassigned
ASV_379	0	17	0	37	44	119	84	0	137	34	94	88	44	46	1	27	0	1	0	0	0	0	0	0	0	0	0	0	773		Bacteria	Acidobacteria	Acidobacteria_Gp6	Unassigned	Unassigned	Gp6	Unassigned
ASV_2639	55	2	0	46	56	314	11	1	9	37	27	11	5	134	57	3	0	0	0	0	1	2	0	0	0	0	0	0	771		Bacteria	Proteobacteria	Alphaproteobacteria	Sphingomonadales	Sphingomonadaceae	Novosphingobium	Novosphingobium_soli
ASV_183	0	0	11	20	25	118	9	73	22	131	154	112	27	36	1	5	2	7	4	2	0	1	0	0	0	0	0	0	760		Bacteria	Candidatus_Saccharibacteria	Unassigned	Unassigned	Unassigned	Saccharibacteria_genera_incertae_sedis	Unassigned
ASV_189	0	0	0	1	14	0	4	4	12	3	14	22	2	13	2	8	27	114	376	1	1	22	2	0	0	1	15	98	756		Bacteria	Verrucomicrobia	Verrucomicrobiae	Verrucomicrobiales	Verrucomicrobiaceae	Unassigned	Unassigned
ASV_165	1	0	0	0	0	0	0	0	0	0	0	0	0	0	0	0	28	13	35	16	24	30	27	421	54	12	35	59	755		Bacteria	Actinobacteria	Actinobacteria	Actinomycetales	Microbacteriaceae	Unassigned	Unassigned
ASV_168	0	0	0	0	0	0	0	0	0	0	0	0	0	0	0	0	101	143	93	43	37	17	28	39	71	29	41	109	751		Bacteria	Chloroflexi	Unassigned	Unassigned	Unassigned	Unassigned	Unassigned
ASV_166	0	0	0	0	0	0	0	0	0	0	0	0	0	0	0	0	5	35	233	34	65	3	50	82	101	12	82	46	748		Bacteria	Unassigned	Unassigned	Unassigned	Unassigned	Unassigned	Unassigned
ASV_178	1	42	0	123	33	97	17	0	69	114	100	70	24	32	6	15	0	1	0	0	0	0	0	0	0	0	0	0	744		Bacteria	Planctomycetes	Planctomycetia	Planctomycetales	Planctomycetaceae	Blastopirellula	Unassigned
ASV_288	0	33	0	77	52	115	62	11	79	28	108	77	25	57	5	15	0	0	0	0	0	0	0	0	0	0	0	0	744		Bacteria	Acidobacteria	Acidobacteria_Gp6	Unassigned	Unassigned	Gp6	Unassigned
ASV_1879	99	0	0	22	35	424	1	0	2	37	31	4	3	64	16	2	0	0	0	0	0	0	0	0	0	0	0	0	740		Bacteria	Proteobacteria	Alphaproteobacteria	Sphingomonadales	Sphingomonadaceae	Unassigned	Unassigned
ASV_182	228	9	0	44	143	117	6	0	5	5	34	4	1	49	85	3	0	0	0	0	0	0	0	0	0	0	0	0	733		Bacteria	Proteobacteria	Alphaproteobacteria	Sphingomonadales	Sphingomonadaceae	Sphingorhabdus	Sphingorhabdus_planktonica
ASV_191	0	0	0	36	44	63	8	108	37	78	146	122	46	34	0	6	0	0	1	0	0	0	0	0	0	0	0	0	729		Bacteria	Verrucomicrobia	Verrucomicrobiae	Verrucomicrobiales	Verrucomicrobiaceae	Unassigned	Unassigned
ASV_227	4	0	0	15	14	53	7	10	75	44	158	132	54	111	3	15	23	0	1	0	0	0	0	0	0	0	0	0	719		Bacteria	Actinobacteria	Actinobacteria	Coriobacteriales	Coriobacteriaceae	Unassigned	Unassigned
ASV_177	0	0	0	0	0	0	0	0	0	0	0	0	0	0	0	0	86	122	85	36	37	24	42	43	73	39	29	100	716		Bacteria	Chloroflexi	Unassigned	Unassigned	Unassigned	Unassigned	Unassigned
ASV_174	0	0	0	1	0	0	1	0	0	0	3	0	0	0	1	0	0	82	3	19	199	2	22	31	14	75	24	238	715		Bacteria	Planctomycetes	Planctomycetia	Planctomycetales	Planctomycetaceae	Blastopirellula	Unassigned
ASV_173	1	712	0	0	0	0	0	0	1	0	0	0	0	0	0	0	0	0	0	0	0	0	0	0	1	0	0	0	715		Bacteria	Proteobacteria	Gammaproteobacteria	Xanthomonadales	Sinobacteraceae	Nevskia	Nevskia_ramosa
ASV_213	0	0	0	0	3	1	0	0	0	0	0	0	0	0	0	0	0	0	0	0	0	5	0	2	0	0	698	0	709		Bacteria	Candidatus_Saccharibacteria	Unassigned	Unassigned	Unassigned	Saccharibacteria_genera_incertae_sedis	Unassigned
ASV_192	646	0	0	0	6	6	0	0	0	0	0	0	0	1	1	5	4	0	0	1	0	0	3	11	6	9	1	4	704		Bacteria	Proteobacteria	Alphaproteobacteria	Sphingomonadales	Sphingomonadaceae	Blastomonas	Blastomonas_natatoria
ASV_210	0	0	1	0	0	0	0	0	0	4	0	0	1	0	0	0	27	34	14	28	53	33	62	275	78	39	19	30	698		Bacteria	Actinobacteria	Actinobacteria	Actinomycetales	Microbacteriaceae	Pontimonas	Pontimonas_salivibrio
ASV_319	1	0	457	1	0	0	1	2	0	4	1	0	0	0	1	0	0	0	207	0	0	0	0	0	0	0	18	0	693		Bacteria	Candidatus_Saccharibacteria	Unassigned	Unassigned	Unassigned	Saccharibacteria_genera_incertae_sedis	Unassigned
ASV_257	7	20	427	2	26	9	3	2	30	28	3	13	94	6	0	20	0	0	0	0	0	0	0	0	0	0	0	0	690		Bacteria	Proteobacteria	Betaproteobacteria	Burkholderiales	Comamonadaceae	Variovorax	Variovorax_guangxiensis
ASV_206	41	12	3	54	260	243	2	0	18	4	9	12	1	7	10	4	0	0	0	0	0	0	0	0	0	0	0	0	680		Bacteria	Proteobacteria	Betaproteobacteria	Burkholderiales	Comamonadaceae	Polaromonas	Polaromonas_aquatica
ASV_243	0	0	0	71	58	56	192	0	64	3	75	58	24	68	2	8	1	0	0	0	0	0	0	0	0	0	0	0	680		Bacteria	Acidobacteria	Acidobacteria_Gp4	Unassigned	Unassigned	Gp4	Unassigned
ASV_381	3	78	0	46	48	150	30	4	87	5	81	62	26	46	2	11	0	1	0	0	0	0	0	0	0	0	0	0	680		Bacteria	Acidobacteria	Acidobacteria_Gp6	Unassigned	Unassigned	Gp6	Unassigned
ASV_176	0	0	0	0	0	0	0	0	0	0	0	0	0	0	0	0	37	4	278	50	56	4	82	91	35	11	24	7	679		Bacteria	Proteobacteria	Alphaproteobacteria	Unassigned	Unassigned	Unassigned	Unassigned
ASV_219	0	0	0	0	0	0	0	0	1	4	7	2	0	7	502	108	31	10	6	0	0	0	0	0	0	0	0	0	678		Bacteria	Verrucomicrobia	Verrucomicrobiae	Verrucomicrobiales	Verrucomicrobiaceae	Unassigned	Unassigned
ASV_184	0	0	0	0	0	0	0	0	0	0	0	0	0	0	0	0	38	30	15	131	125	45	22	41	22	14	14	179	676		Bacteria	Chloroflexi	Unassigned	Unassigned	Unassigned	Unassigned	Unassigned
ASV_196	228	9	0	42	90	183	3	0	5	7	17	5	0	48	33	4	0	0	0	0	0	0	0	0	0	0	0	0	674		Bacteria	Proteobacteria	Alphaproteobacteria	Sphingomonadales	Sphingomonadaceae	Sphingorhabdus	Sphingorhabdus_planktonica
ASV_205	29	4	10	130	138	120	2	3	14	22	26	10	65	18	3	73	0	0	0	0	0	0	1	0	0	0	0	0	668		Bacteria	Proteobacteria	Betaproteobacteria	Burkholderiales	Comamonadaceae	Variovorax	Unassigned
ASV_203	427	51	1	4	2	17	2	19	8	46	24	8	3	49	4	0	0	0	0	0	0	0	0	0	0	0	0	0	665		Bacteria	Proteobacteria	Alphaproteobacteria	Sphingomonadales	Sphingomonadaceae	Sphingomonas	Sphingomonas_faeni
ASV_198	39	6	1	28	320	151	9	0	41	18	16	12	6	8	0	5	0	0	0	0	0	0	0	0	0	0	0	0	660		Bacteria	Proteobacteria	Betaproteobacteria	Burkholderiales	Comamonadaceae	Variovorax	Variovorax_guangxiensis
ASV_238	33	0	0	0	0	2	0	0	0	3	0	0	0	2	136	1	0	1	0	454	15	0	2	0	0	9	0	0	658		Bacteria	Firmicutes	Bacilli	Bacillales	Planococcaceae	Planococcus	Unassigned
ASV_241	28	2	376	6	81	22	0	1	43	17	1	19	28	2	0	32	0	0	0	0	0	0	0	0	0	0	0	0	658		Bacteria	Proteobacteria	Betaproteobacteria	Burkholderiales	Comamonadaceae	Variovorax	Variovorax_boronicumulans
ASV_199	0	0	0	0	0	0	0	0	0	0	0	0	0	0	0	0	6	12	12	21	55	8	48	221	101	72	41	60	657		Bacteria	Actinobacteria	Actinobacteria	Unassigned	Unassigned	Unassigned	Unassigned
ASV_209	1	4	1	39	37	117	122	7	71	16	84	55	42	41	1	17	0	0	0	0	0	0	0	0	0	0	0	0	655		Bacteria	Acidobacteria	Acidobacteria_Gp6	Unassigned	Unassigned	Gp6	Unassigned
ASV_212	0	0	1	2	6	1	1	6	6	4	9	24	2	11	1	11	37	76	365	0	1	10	0	2	0	1	10	66	653		Bacteria	Verrucomicrobia	Verrucomicrobiae	Verrucomicrobiales	Verrucomicrobiaceae	Unassigned	Unassigned
ASV_217	1	0	0	13	2	3	3	6	6	13	28	17	4	7	121	384	28	14	1	0	0	0	0	0	0	0	0	0	651		Bacteria	Planctomycetes	Planctomycetia	Planctomycetales	Planctomycetaceae	Unassigned	Unassigned
ASV_413	169	42	2	23	4	7	2	6	0	3	21	4	0	82	283	0	0	0	0	0	0	0	0	0	0	0	0	0	648		Bacteria	Bacteroidetes	Cytophagia	Cytophagales	Cytophagaceae	Hymenobacter	Unassigned
ASV_202	0	0	0	0	0	0	0	0	0	0	0	0	0	0	563	0	83	0	0	0	0	0	0	0	0	0	0	0	646		Bacteria	Planctomycetes	Planctomycetia	Planctomycetales	Planctomycetaceae	Unassigned	Unassigned
ASV_188	0	0	0	1	0	0	0	0	0	3	2	1	0	0	0	0	637	0	0	0	0	0	0	0	0	0	0	0	644		Bacteria	Candidatus_Saccharibacteria	Unassigned	Unassigned	Unassigned	Saccharibacteria_genera_incertae_sedis	Unassigned
ASV_195	97	0	4	65	55	37	5	5	9	139	43	4	10	141	22	7	0	0	0	0	0	0	0	0	0	0	0	0	643		Bacteria	Proteobacteria	Alphaproteobacteria	Sphingomonadales	Sphingomonadaceae	Sphingorhabdus	Sphingorhabdus_planktonica
ASV_5128	51	1	0	76	352	67	1	0	19	11	14	4	11	28	5	2	0	0	0	0	0	0	0	0	0	0	0	0	642		Bacteria	Proteobacteria	Betaproteobacteria	Burkholderiales	Comamonadaceae	Unassigned	Unassigned
ASV_197	0	1	476	0	1	0	0	0	18	5	0	12	15	2	2	105	1	0	0	0	1	2	0	0	0	0	0	0	641		Bacteria	Proteobacteria	Betaproteobacteria	Burkholderiales	Comamonadaceae	Limnohabitans	Unassigned
ASV_204	93	211	2	1	4	34	1	1	1	9	1	1	0	8	22	1	6	0	3	1	10	3	0	205	22	0	0	0	640		Bacteria	Actinobacteria	Actinobacteria	Actinomycetales	Nocardiaceae	Rhodococcus	Unassigned
ASV_208	82	248	1	0	7	15	0	0	1	7	3	4	0	4	28	1	4	0	0	2	12	6	3	191	16	0	0	0	635		Bacteria	Actinobacteria	Actinobacteria	Actinomycetales	Nocardiaceae	Rhodococcus	Unassigned
ASV_452	0	20	0	146	20	9	61	2	85	28	82	40	11	28	55	18	11	14	1	0	0	0	1	0	0	0	0	0	632		Bacteria	Unassigned	Unassigned	Unassigned	Unassigned	Unassigned	Unassigned
ASV_193	0	0	0	0	0	0	0	0	0	0	0	0	0	0	0	0	18	4	46	3	6	11	3	521	1	2	4	9	628		Bacteria	Bacteroidetes	Cytophagia	Cytophagales	Unassigned	Unassigned	Unassigned
ASV_214	0	0	0	0	0	0	0	0	0	0	0	0	0	1	0	0	28	113	59	19	24	21	13	13	29	38	82	184	624		Bacteria	Planctomycetes	Planctomycetia	Planctomycetales	Planctomycetaceae	Unassigned	Unassigned
ASV_211	0	12	0	135	32	51	21	4	70	46	92	61	19	32	3	43	1	1	0	0	0	0	0	0	0	0	0	0	623		Bacteria	Acidobacteria	Acidobacteria_Gp4	Unassigned	Unassigned	Aridibacter	Aridibacter_famidurans
ASV_425	4	34	0	30	15	50	236	0	72	7	35	63	35	28	1	12	0	0	0	0	0	0	0	0	0	0	0	0	622		Bacteria	Acidobacteria	Acidobacteria_Gp6	Unassigned	Unassigned	Gp6	Unassigned
ASV_221	32	124	0	45	6	145	45	0	20	31	75	44	26	25	3	0	0	0	0	0	0	0	0	0	0	0	0	0	621		Bacteria	Parcubacteria	Unassigned	Unassigned	Unassigned	Parcubacteria_genera_incertae_sedis	Unassigned
ASV_200	0	0	0	0	1	0	0	0	1	0	0	0	0	0	451	0	166	0	0	0	0	0	0	0	0	0	0	0	619		Bacteria	Planctomycetes	Planctomycetia	Planctomycetales	Planctomycetaceae	Unassigned	Unassigned
ASV_235	31	0	3	0	0	5	1	0	1	147	1	2	1	11	281	7	0	0	1	3	0	1	6	5	0	5	5	97	614		Bacteria	Firmicutes	Bacilli	Bacillales	Planococcaceae	Planomicrobium	Planomicrobium_mcmeekinii
ASV_231	186	63	0	52	2	46	2	2	1	26	45	6	2	99	78	0	0	0	0	0	0	0	0	0	0	0	0	0	610		Bacteria	Bacteroidetes	Cytophagia	Cytophagales	Cytophagaceae	Hymenobacter	Hymenobacter_glaciei
ASV_226	0	0	0	3	0	0	1	0	4	1	4	2	1	0	0	0	17	135	53	84	30	3	54	2	48	28	87	46	603		Bacteria	Chloroflexi	Caldilineae	Caldilineales	Caldilineaceae	Litorilinea	Litorilinea_aerophila
ASV_350	82	0	26	44	171	26	0	0	37	55	10	22	60	29	7	19	0	0	0	3	2	0	0	0	0	0	0	4	597		Bacteria	Proteobacteria	Betaproteobacteria	Burkholderiales	Comamonadaceae	Polaromonas	Unassigned
ASV_260	1	62	0	42	73	31	52	18	41	1	93	64	15	56	20	18	2	0	0	0	0	0	0	0	0	0	0	0	589		Bacteria	Actinobacteria	Actinobacteria	Unassigned	Unassigned	Unassigned	Unassigned
ASV_215	0	0	0	0	0	0	0	0	0	0	0	0	0	0	0	0	35	109	48	52	27	38	10	13	15	17	36	182	582		Bacteria	Planctomycetes	Planctomycetia	Planctomycetales	Planctomycetaceae	Rhodopirellula	Rhodopirellula_rosea
ASV_246	0	0	0	0	0	0	0	0	0	6	0	0	13	3	0	0	2	0	168	0	0	0	0	7	1	0	103	278	581		Bacteria	Verrucomicrobia	Verrucomicrobiae	Verrucomicrobiales	Verrucomicrobiaceae	Luteolibacter	Unassigned
ASV_247	0	5	0	1	0	2	523	0	5	2	13	15	7	3	0	3	1	1	0	0	0	0	0	0	0	0	0	0	581		Bacteria	Unassigned	Unassigned	Unassigned	Unassigned	Unassigned	Unassigned
ASV_222	0	1	471	0	1	0	0	0	6	20	0	4	72	0	0	5	0	0	0	0	0	0	0	0	0	0	0	0	580		Bacteria	Proteobacteria	Betaproteobacteria	Burkholderiales	Comamonadaceae	Unassigned	Unassigned
ASV_232	24	0	0	80	186	134	30	0	8	3	26	4	1	39	44	0	0	0	0	0	0	0	0	0	0	0	0	0	579		Bacteria	Bacteroidetes	Sphingobacteriia	Sphingobacteriales	Chitinophagaceae	Ferruginibacter	Unassigned
ASV_370	0	18	0	61	41	67	53	10	55	14	75	49	20	47	2	58	2	2	0	0	0	4	0	0	0	0	1	0	579		Bacteria	Acidobacteria	Acidobacteria_Gp6	Unassigned	Unassigned	Gp6	Unassigned
ASV_218	245	14	0	13	70	12	0	0	8	1	9	6	1	13	178	4	0	0	0	0	0	0	0	0	0	0	0	2	576		Bacteria	Proteobacteria	Betaproteobacteria	Burkholderiales	Comamonadaceae	Polaromonas	Polaromonas_jejuensis
ASV_445	141	0	2	43	35	57	5	0	4	67	36	3	9	144	18	7	0	0	0	0	0	0	0	0	0	0	0	0	571		Bacteria	Proteobacteria	Alphaproteobacteria	Sphingomonadales	Sphingomonadaceae	Sphingorhabdus	Sphingorhabdus_wooponensis
ASV_233	1	4	0	71	30	73	89	39	62	5	62	56	22	26	0	29	0	0	0	0	0	0	0	0	0	0	0	0	569		Bacteria	Acidobacteria	Acidobacteria_Gp6	Unassigned	Unassigned	Gp6	Unassigned
ASV_252	0	1	502	0	0	0	0	0	3	10	0	1	27	0	1	21	1	0	1	0	0	1	0	0	0	0	0	0	569		Bacteria	Proteobacteria	Betaproteobacteria	Burkholderiales	Burkholderiaceae	Polynucleobacter	Polynucleobacter_necessarius_subsp._asymbioticus
ASV_792	0	0	2	0	1	1	0	1	2	0	0	2	0	1	0	0	10	97	111	35	29	14	41	10	44	77	59	26	563		Bacteria	Verrucomicrobia	Spartobacteria	Unassigned	Unassigned	Unassigned	Unassigned
ASV_258	0	11	0	2	3	22	475	0	4	0	12	13	10	9	1	0	0	0	0	0	0	0	0	0	0	0	0	0	562		Bacteria	Unassigned	Unassigned	Unassigned	Unassigned	Unassigned	Unassigned
ASV_259	17	1	1	0	0	0	0	0	0	12	1	2	0	4	455	7	0	0	3	1	0	0	0	3	0	0	2	49	558		Bacteria	Firmicutes	Bacilli	Bacillales	Planococcaceae	Planomicrobium	Planomicrobium_mcmeekinii
ASV_229	48	0	38	2	8	4	1	0	1	30	14	8	2	135	224	34	8	0	0	0	0	0	0	0	0	0	0	0	557		Bacteria	Proteobacteria	Alphaproteobacteria	Sphingomonadales	Sphingomonadaceae	Sphingorhabdus	Sphingorhabdus_planktonica
ASV_237	167	65	0	48	2	20	1	13	0	20	48	2	2	122	46	1	0	0	0	0	0	0	0	0	0	0	0	0	557		Bacteria	Bacteroidetes	Cytophagia	Cytophagales	Cytophagaceae	Hymenobacter	Unassigned
ASV_304	2	46	1	23	53	59	61	12	52	4	56	81	4	58	23	16	2	2	0	0	0	0	0	0	0	0	0	0	555		Bacteria	Actinobacteria	Actinobacteria	Unassigned	Unassigned	Unassigned	Unassigned
ASV_250	5	4	0	0	0	3	0	3	0	64	3	5	1	2	433	2	2	2	1	0	0	0	0	0	0	21	0	0	551		Bacteria	Firmicutes	Bacilli	Bacillales	Bacillales_Incertae_Sedis_XII	Exiguobacterium	Exiguobacterium_artemiae
ASV_261	2	51	0	51	27	88	54	0	40	10	59	75	33	55	3	2	0	0	0	0	0	0	0	0	0	0	0	0	550		Bacteria	Unassigned	Unassigned	Unassigned	Unassigned	Unassigned	Unassigned
ASV_254	212	0	0	47	80	54	8	0	3	6	23	7	1	60	48	0	0	0	0	0	0	0	0	0	0	0	0	0	549		Bacteria	Proteobacteria	Alphaproteobacteria	Sphingomonadales	Unassigned	Unassigned	Unassigned
ASV_297	16	7	0	47	166	177	3	0	13	18	36	16	17	24	1	5	0	0	0	0	0	0	0	0	0	0	0	0	546		Bacteria	Proteobacteria	Betaproteobacteria	Burkholderiales	Comamonadaceae	Polaromonas	Polaromonas_aquatica
ASV_230	0	0	0	0	0	0	0	0	0	0	0	0	0	0	0	0	86	78	77	26	21	8	16	42	33	10	39	109	545		Bacteria	Chloroflexi	Unassigned	Unassigned	Unassigned	Unassigned	Unassigned
ASV_268	1	31	1	36	11	48	19	87	41	23	55	61	10	6	4	2	3	0	104	0	0	0	0	0	0	0	0	0	543		Bacteria	Unassigned	Unassigned	Unassigned	Unassigned	Unassigned	Unassigned
ASV_242	0	0	0	0	0	0	0	0	0	0	0	0	1	1	0	0	0	0	0	0	279	1	25	23	194	0	18	0	542		Bacteria	Proteobacteria	Alphaproteobacteria	Caulobacterales	Caulobacteraceae	Brevundimonas	Unassigned
ASV_483	2	20	0	35	24	52	211	0	55	7	49	41	15	20	1	9	0	0	0	0	0	0	0	0	0	0	0	0	541		Bacteria	Acidobacteria	Acidobacteria_Gp6	Unassigned	Unassigned	Gp6	Unassigned
ASV_300	1	0	0	81	59	23	16	2	29	38	84	74	33	46	8	39	1	2	0	0	0	0	0	0	0	0	0	0	536		Bacteria	Verrucomicrobia	Verrucomicrobiae	Verrucomicrobiales	Verrucomicrobiaceae	Luteolibacter	Luteolibacter_yonseiensis
ASV_244	0	0	160	0	0	1	0	0	2	85	1	8	72	2	0	100	7	6	9	19	12	3	7	19	10	2	3	3	531		Bacteria	Proteobacteria	Betaproteobacteria	Burkholderiales	Burkholderiaceae	Polynucleobacter	Polynucleobacter_difficilis
ASV_245	1	435	0	1	1	5	1	0	3	9	12	21	2	5	0	2	0	0	0	0	0	31	0	0	0	0	1	0	530		Bacteria	Candidatus_Saccharibacteria	Unassigned	Unassigned	Unassigned	Saccharibacteria_genera_incertae_sedis	Unassigned
ASV_269	250	2	0	24	53	98	6	0	4	6	14	1	1	45	25	1	0	0	0	0	0	0	0	0	0	0	0	0	530		Bacteria	Proteobacteria	Alphaproteobacteria	Sphingomonadales	Unassigned	Unassigned	Unassigned
ASV_577	13	1	1	14	2	1	0	12	0	65	27	9	1	107	263	0	0	0	0	2	0	0	0	0	0	4	0	0	522		Bacteria	Bacteroidetes	Cytophagia	Cytophagales	Cytophagaceae	Hymenobacter	Hymenobacter_rigui
ASV_249	0	0	0	2	0	0	0	4	0	2	0	3	5	0	0	0	0	2	0	2	1	483	3	0	0	0	0	0	507		Bacteria	Unassigned	Unassigned	Unassigned	Unassigned	Unassigned	Unassigned
ASV_263	0	0	0	0	1	6	0	0	3	10	1	5	47	6	0	409	4	1	8	3	0	0	0	0	0	1	1	0	506		Bacteria	Bacteroidetes	Cytophagia	Cytophagales	Cyclobacteriaceae	Algoriphagus	Algoriphagus_mannitolivorans
ASV_236	103	4	9	4	12	46	2	1	1	0	4	0	0	34	278	0	1	0	0	0	0	0	0	0	0	0	0	0	499		Bacteria	Bacteroidetes	Flavobacteriia	Flavobacteriales	Flavobacteriaceae	Flavobacterium	Unassigned
ASV_275	91	5	0	187	22	117	3	0	1	6	16	5	2	37	4	1	0	0	0	0	0	0	0	0	0	0	0	0	497		Bacteria	Proteobacteria	Alphaproteobacteria	Sphingomonadales	Sphingomonadaceae	Unassigned	Unassigned
ASV_270	0	0	0	0	0	0	1	0	0	0	1	0	0	0	2	1	34	74	68	6	11	21	25	22	28	34	61	107	496		Bacteria	Planctomycetes	Planctomycetia	Planctomycetales	Planctomycetaceae	Unassigned	Unassigned
ASV_1151	3	0	3	67	195	81	3	0	20	24	4	1	68	9	1	15	0	0	0	0	0	0	0	0	0	0	0	0	494		Bacteria	Proteobacteria	Betaproteobacteria	Burkholderiales	Comamonadaceae	Variovorax	Variovorax_boronicumulans
ASV_486	0	0	0	0	0	0	0	0	0	0	1	7	27	23	3	415	8	2	1	0	0	0	0	0	0	0	0	0	487		Bacteria	Verrucomicrobia	Verrucomicrobiae	Verrucomicrobiales	Verrucomicrobiaceae	Prosthecobacter	Unassigned
ASV_256	2	0	0	0	1	1	0	0	0	0	2	1	0	0	2	0	3	4	35	0	29	0	5	331	21	0	7	38	482		Bacteria	Verrucomicrobia	Verrucomicrobiae	Verrucomicrobiales	Verrucomicrobiaceae	Luteolibacter	Unassigned
ASV_267	173	5	3	6	21	3	4	6	2	13	41	0	1	54	138	2	0	0	0	0	0	0	0	1	0	0	0	0	473		Bacteria	Proteobacteria	Alphaproteobacteria	Caulobacterales	Caulobacteraceae	Brevundimonas	Unassigned
ASV_287	0	0	0	0	0	0	0	12	0	334	2	4	3	1	57	2	0	1	1	0	0	0	0	0	0	55	0	0	472		Bacteria	Firmicutes	Bacilli	Bacillales	Bacillales_Incertae_Sedis_XII	Exiguobacterium	Unassigned
ASV_265	0	0	5	0	0	0	1	0	0	0	0	0	0	0	2	0	19	0	360	1	0	0	0	0	0	0	82	0	470		Bacteria	Proteobacteria	Alphaproteobacteria	Caulobacterales	Caulobacteraceae	Brevundimonas	Unassigned
ASV_251	0	0	0	0	0	0	0	0	0	0	0	0	0	0	0	0	60	79	67	19	18	13	14	47	40	10	34	67	468		Bacteria	Chloroflexi	Caldilineae	Caldilineales	Caldilineaceae	Unassigned	Unassigned
ASV_491	19	1	0	97	115	55	21	1	36	25	37	7	4	35	9	1	0	0	0	0	0	0	0	0	0	0	0	0	463		Bacteria	Bacteroidetes	Sphingobacteriia	Sphingobacteriales	Chitinophagaceae	Ferruginibacter	Ferruginibacter_yonginensis
ASV_276	0	47	0	1	3	0	1	0	19	7	3	28	79	2	1	245	19	3	1	0	0	0	0	0	0	0	0	0	459		Bacteria	Verrucomicrobia	Verrucomicrobiae	Verrucomicrobiales	Verrucomicrobiaceae	Prosthecobacter	Prosthecobacter_vanneervenii
ASV_281	1	0	1	0	0	0	0	0	0	4	1	0	0	1	9	0	1	3	2	2	29	52	0	0	0	11	93	249	459		Bacteria	Firmicutes	Bacilli	Bacillales	Planococcaceae	Paenisporosarcina	Paenisporosarcina_antarctica
ASV_264	0	6	0	1	2	435	6	0	0	3	0	1	1	0	0	0	0	0	0	0	0	0	0	0	0	0	0	0	455		Bacteria	Proteobacteria	Gammaproteobacteria	Pseudomonadales	Moraxellaceae	Acinetobacter	Unassigned
ASV_284	32	0	0	63	92	174	16	0	2	1	16	5	0	29	25	0	0	0	0	0	0	0	0	0	0	0	0	0	455		Bacteria	Bacteroidetes	Sphingobacteriia	Sphingobacteriales	Chitinophagaceae	Ferruginibacter	Unassigned
ASV_291	33	6	15	9	187	131	1	0	22	6	6	7	0	8	11	7	0	0	0	0	0	0	0	1	0	0	0	0	450		Bacteria	Proteobacteria	Betaproteobacteria	Burkholderiales	Comamonadaceae	Unassigned	Unassigned
ASV_296	34	6	1	10	10	39	9	0	3	75	63	8	2	118	36	17	6	1	0	0	0	3	0	5	0	0	0	1	447		Bacteria	Proteobacteria	Alphaproteobacteria	Caulobacterales	Caulobacteraceae	Brevundimonas	Unassigned
ASV_1288	3	6	2	3	1	31	32	24	25	37	118	96	16	42	7	1	0	0	0	0	0	0	0	0	0	0	0	0	444		Bacteria	Parcubacteria	Unassigned	Unassigned	Unassigned	Parcubacteria_genera_incertae_sedis	Unassigned
ASV_306	235	57	0	9	2	17	0	20	6	47	11	7	2	23	4	3	0	0	0	0	0	0	0	0	0	0	0	0	443		Bacteria	Proteobacteria	Alphaproteobacteria	Sphingomonadales	Sphingomonadaceae	Sphingomonas	Unassigned
ASV_303	0	0	2	0	0	0	0	0	4	14	0	1	139	3	0	274	3	0	0	0	0	0	0	0	0	0	0	0	440		Bacteria	Proteobacteria	Betaproteobacteria	Burkholderiales	Comamonadaceae	Unassigned	Unassigned
ASV_278	0	0	0	0	0	0	0	0	0	0	0	0	0	0	0	0	0	0	0	0	0	0	0	0	0	0	435	0	435		Bacteria	Parcubacteria	Unassigned	Unassigned	Unassigned	Parcubacteria_genera_incertae_sedis	Unassigned
ASV_282	3	277	0	1	0	114	1	1	8	1	7	11	5	1	0	5	0	0	0	0	0	0	0	0	0	0	0	0	435		Bacteria	Parcubacteria	Unassigned	Unassigned	Unassigned	Parcubacteria_genera_incertae_sedis	Unassigned
ASV_386	2	50	0	7	1	8	2	273	2	13	44	21	9	0	0	2	0	0	0	0	0	0	0	0	0	0	0	0	434		Bacteria	Candidatus_Saccharibacteria	Unassigned	Unassigned	Unassigned	Saccharibacteria_genera_incertae_sedis	Unassigned
ASV_404	1	27	0	70	30	19	11	8	23	21	70	76	37	22	2	17	0	0	0	0	0	0	0	0	0	0	0	0	434		Bacteria	Verrucomicrobia	Verrucomicrobiae	Verrucomicrobiales	Verrucomicrobiaceae	Unassigned	Unassigned
ASV_337	67	15	5	33	57	39	17	24	9	32	58	4	30	20	9	4	3	0	5	0	0	0	0	1	0	0	0	0	432		Bacteria	Verrucomicrobia	Verrucomicrobiae	Verrucomicrobiales	Verrucomicrobiaceae	Luteolibacter	Luteolibacter_luojiensis
ASV_335	0	44	0	22	9	39	11	18	32	24	61	46	37	37	1	14	32	1	2	0	0	0	0	0	0	0	0	0	430		Bacteria	Actinobacteria	Actinobacteria	Unassigned	Unassigned	Unassigned	Unassigned
ASV_1009	0	0	0	0	0	0	1	1	0	0	0	0	0	0	0	0	0	32	2	5	67	1	0	32	7	36	11	230	425		Bacteria	Planctomycetes	Planctomycetia	Planctomycetales	Planctomycetaceae	Blastopirellula	Unassigned
ASV_2500	10	45	1	31	12	51	12	41	18	42	63	55	13	22	6	2	0	0	0	0	0	0	0	0	0	0	0	0	424		Bacteria	Candidatus_Saccharibacteria	Unassigned	Unassigned	Unassigned	Saccharibacteria_genera_incertae_sedis	Unassigned
ASV_272	0	0	0	0	0	0	0	2	0	0	1	1	0	0	0	0	10	93	77	47	27	60	13	4	8	2	49	27	421		Bacteria	Planctomycetes	Planctomycetia	Planctomycetales	Planctomycetaceae	Planctopirus	Planctopirus_limnophila
ASV_271	0	0	372	0	0	0	0	0	1	12	1	6	9	1	0	14	3	0	1	0	0	0	0	0	0	0	0	0	420		Bacteria	Proteobacteria	Betaproteobacteria	Burkholderiales	Burkholderiaceae	Polynucleobacter	Polynucleobacter_necessarius_subsp._asymbioticus
ASV_389	2	1	263	1	3	3	1	1	29	4	0	11	56	4	2	34	0	0	0	0	0	0	0	3	0	0	1	1	420		Bacteria	Proteobacteria	Betaproteobacteria	Burkholderiales	Comamonadaceae	Unassigned	Unassigned
ASV_494	2	30	0	36	22	44	107	7	38	3	41	43	15	21	1	10	0	0	0	0	0	0	0	0	0	0	0	0	420		Bacteria	Acidobacteria	Acidobacteria_Gp6	Unassigned	Unassigned	Gp6	Unassigned
ASV_308	118	2	0	12	3	12	0	0	0	148	5	3	17	71	21	3	1	2	0	0	0	0	0	0	0	0	0	0	418		Bacteria	Actinobacteria	Actinobacteria	Actinomycetales	Micrococcaceae	Arthrobacter	Unassigned
ASV_409	1	1	0	5	4	4	6	114	22	34	43	53	21	68	2	22	11	0	3	3	0	0	0	0	0	0	0	0	417		Bacteria	Unassigned	Unassigned	Unassigned	Unassigned	Unassigned	Unassigned
ASV_323	0	17	0	27	16	67	54	4	27	3	88	65	18	26	1	3	0	0	0	0	0	0	0	0	0	0	0	0	416		Bacteria	Unassigned	Unassigned	Unassigned	Unassigned	Unassigned	Unassigned
ASV_285	17	0	0	0	0	5	0	0	1	6	0	0	0	1	59	3	0	1	0	306	10	0	1	0	0	3	0	0	413		Bacteria	Firmicutes	Bacilli	Bacillales	Planococcaceae	Unassigned	Unassigned
ASV_307	46	0	16	3	9	6	0	6	3	142	39	7	6	117	9	1	0	0	0	0	0	0	0	0	0	0	1	0	411		Bacteria	Proteobacteria	Alphaproteobacteria	Caulobacterales	Caulobacteraceae	Brevundimonas	Brevundimonas_variabilis
ASV_318	0	0	2	0	1	0	0	0	1	5	4	4	1	6	240	101	32	9	2	0	0	0	0	0	0	0	0	0	408		Bacteria	Verrucomicrobia	Verrucomicrobiae	Verrucomicrobiales	Verrucomicrobiaceae	Unassigned	Unassigned
ASV_5026	15	2	0	124	44	88	6	0	13	46	29	13	3	8	14	3	0	0	0	0	0	0	0	0	0	0	0	0	408		Bacteria	Proteobacteria	Alphaproteobacteria	Rhodobacterales	Rhodobacteraceae	Unassigned	Unassigned
ASV_341	100	9	3	27	25	59	10	32	10	43	34	17	9	20	6	1	0	0	2	0	0	0	0	0	0	0	0	0	407		Bacteria	Verrucomicrobia	Verrucomicrobiae	Verrucomicrobiales	Verrucomicrobiaceae	Luteolibacter	Luteolibacter_luojiensis
ASV_694	0	0	0	6	0	0	3	24	134	10	50	70	10	42	11	22	24	0	0	0	0	0	0	0	0	0	0	1	407		Bacteria	Acidobacteria	Acidobacteria_Gp6	Unassigned	Unassigned	Gp6	Unassigned
ASV_280	0	0	0	1	1	1	0	0	1	1	0	1	0	0	0	0	0	0	0	0	0	399	0	1	0	0	0	0	406		Bacteria	Candidatus_Saccharibacteria	Unassigned	Unassigned	Unassigned	Saccharibacteria_genera_incertae_sedis	Unassigned
ASV_314	0	0	53	0	0	9	0	3	3	255	10	6	19	29	1	11	2	1	0	0	0	2	0	1	0	0	0	0	405		Bacteria	Actinobacteria	Actinobacteria	Actinomycetales	Microbacteriaceae	Unassigned	Unassigned
ASV_333	2	0	1	0	0	0	0	0	1	329	1	0	2	5	59	0	0	0	0	0	0	0	0	0	0	0	1	2	403		Bacteria	Firmicutes	Bacilli	Bacillales	Planococcaceae	Planomicrobium	Planomicrobium_mcmeekinii
ASV_286	0	0	0	0	3	3	0	0	0	1	1	1	0	0	1	0	0	0	0	0	0	0	0	0	0	0	391	0	401		Bacteria	Candidatus_Saccharibacteria	Unassigned	Unassigned	Unassigned	Saccharibacteria_genera_incertae_sedis	Unassigned
ASV_299	0	2	5	1	0	2	0	0	0	141	6	3	18	24	0	124	25	7	4	0	3	4	3	16	2	4	3	3	400		Bacteria	Proteobacteria	Betaproteobacteria	Burkholderiales	Alcaligenaceae	Unassigned	Unassigned
ASV_4654	5	75	1	3	0	29	24	2	19	31	98	62	11	26	6	0	2	0	4	1	0	0	0	0	0	0	0	0	399		Bacteria	Parcubacteria	Unassigned	Unassigned	Unassigned	Parcubacteria_genera_incertae_sedis	Unassigned
ASV_302	1	1	1	103	79	67	11	0	8	7	35	1	6	56	8	5	1	0	0	1	0	0	3	3	0	1	0	0	398		Bacteria	Proteobacteria	Gammaproteobacteria	Xanthomonadales	Xanthomonadaceae	Unassigned	Unassigned
ASV_377	0	0	0	0	0	0	0	0	0	2	0	6	37	3	3	305	25	14	1	0	1	0	0	0	0	0	1	0	398		Bacteria	Verrucomicrobia	Verrucomicrobiae	Verrucomicrobiales	Verrucomicrobiaceae	Unassigned	Unassigned
ASV_301	0	0	0	0	0	0	0	0	0	1	0	0	0	1	21	187	68	30	65	1	3	1	0	2	3	1	11	2	397		Bacteria	Planctomycetes	Planctomycetia	Planctomycetales	Planctomycetaceae	Unassigned	Unassigned
ASV_398	1	0	1	7	1	0	9	175	11	44	80	41	12	8	5	0	1	1	0	0	0	0	0	0	0	0	0	0	397		Bacteria	Candidatus_Saccharibacteria	Unassigned	Unassigned	Unassigned	Saccharibacteria_genera_incertae_sedis	Unassigned
ASV_356	0	1	0	0	0	0	0	0	0	1	0	0	0	0	2	0	0	0	0	65	0	2	0	0	0	0	0	321	392		Bacteria	Firmicutes	Bacilli	Lactobacillales	Carnobacteriaceae	Carnobacterium	Carnobacterium_pleistocenium
ASV_279	0	0	0	0	1	0	1	0	2	0	0	1	0	0	0	0	0	0	0	0	0	384	0	2	0	0	0	0	391		Bacteria	Candidatus_Saccharibacteria	Unassigned	Unassigned	Unassigned	Saccharibacteria_genera_incertae_sedis	Unassigned
ASV_325	0	0	0	0	0	0	0	1	0	0	0	0	0	0	0	0	29	88	87	20	16	20	9	4	16	16	53	31	390		Bacteria	Planctomycetes	Planctomycetia	Planctomycetales	Planctomycetaceae	Pirellula	Pirellula_staleyi
ASV_347	0	0	140	0	0	0	0	0	7	41	0	13	85	2	0	100	0	0	0	0	0	1	0	0	0	1	0	0	390		Bacteria	Proteobacteria	Betaproteobacteria	Burkholderiales	Burkholderiaceae	Polynucleobacter	Polynucleobacter_cosmopolitanus
ASV_456	1	26	0	24	87	55	33	14	50	1	37	30	5	10	4	12	0	0	0	0	0	0	0	0	0	0	0	0	389		Bacteria	Acidobacteria	Acidobacteria_Gp6	Unassigned	Unassigned	Gp6	Unassigned
ASV_566	7	31	0	26	23	79	17	31	20	6	79	41	11	14	2	2	0	0	0	0	0	0	0	0	0	0	0	0	389		Bacteria	Candidatus_Saccharibacteria	Unassigned	Unassigned	Unassigned	Saccharibacteria_genera_incertae_sedis	Unassigned
ASV_2986	0	346	0	1	0	20	1	0	3	0	1	10	6	1	0	0	0	0	0	0	0	0	0	0	0	0	0	0	389		Bacteria	Unassigned	Unassigned	Unassigned	Unassigned	Unassigned	Unassigned
ASV_348	0	6	0	0	15	70	3	0	7	124	57	63	15	22	5	0	0	1	0	0	0	0	0	0	0	0	0	0	388		Bacteria	Candidatus_Saccharibacteria	Unassigned	Unassigned	Unassigned	Saccharibacteria_genera_incertae_sedis	Unassigned
ASV_295	0	0	0	0	0	0	0	0	0	0	0	0	0	0	0	0	14	3	7	2	5	8	2	251	10	10	11	59	382		Bacteria	Actinobacteria	Actinobacteria	Actinomycetales	Microbacteriaceae	Unassigned	Unassigned
ASV_357	0	0	0	41	20	94	11	19	32	9	73	45	5	13	10	5	3	0	0	0	0	0	0	0	0	0	0	0	380		Bacteria	Verrucomicrobia	Unassigned	Unassigned	Unassigned	Unassigned	Unassigned
ASV_710	3	76	0	23	4	38	4	146	1	11	27	27	12	6	1	0	1	0	0	0	0	0	0	0	0	0	0	0	380		Bacteria	Candidatus_Saccharibacteria	Unassigned	Unassigned	Unassigned	Saccharibacteria_genera_incertae_sedis	Unassigned
ASV_353	0	0	39	0	0	0	0	0	0	72	0	2	18	5	0	8	17	5	21	0	7	3	10	105	10	22	12	21	377		Bacteria	Actinobacteria	Actinobacteria	Actinomycetales	Microbacteriaceae	Rhodoluna	Rhodoluna_lacicola
ASV_434	65	0	13	5	13	8	2	0	3	27	8	5	8	49	85	69	10	0	2	0	0	0	0	2	0	1	0	1	376		Bacteria	Proteobacteria	Alphaproteobacteria	Sphingomonadales	Sphingomonadaceae	Sphingorhabdus	Sphingorhabdus_wooponensis
ASV_322	1	33	1	24	15	106	13	9	7	31	51	51	18	10	2	0	1	0	0	0	0	1	0	0	0	0	0	0	374		Bacteria	Candidatus_Saccharibacteria	Unassigned	Unassigned	Unassigned	Saccharibacteria_genera_incertae_sedis	Unassigned
ASV_3031	0	0	0	26	9	18	4	142	12	16	56	32	10	6	39	2	0	2	0	0	0	0	0	0	0	0	0	0	374		Bacteria	Candidatus_Saccharibacteria	Unassigned	Unassigned	Unassigned	Saccharibacteria_genera_incertae_sedis	Unassigned
ASV_334	94	1	0	10	0	3	0	4	1	162	4	2	12	54	23	1	1	0	0	0	0	0	1	0	0	0	0	0	373		Bacteria	Actinobacteria	Actinobacteria	Actinomycetales	Micrococcaceae	Arthrobacter	Unassigned
ASV_317	46	5	0	31	30	163	3	0	6	15	19	2	2	41	9	0	0	0	0	0	0	0	0	0	0	0	0	0	372		Bacteria	Proteobacteria	Alphaproteobacteria	Sphingomonadales	Sphingomonadaceae	Sphingorhabdus	Unassigned
ASV_621	0	5	0	19	79	14	33	0	92	0	47	33	9	20	4	16	1	0	0	0	0	0	0	0	0	0	0	0	372		Bacteria	Acidobacteria	Acidobacteria_Gp6	Unassigned	Unassigned	Gp6	Unassigned
ASV_420	3	114	0	19	4	6	3	87	11	11	44	48	10	9	0	0	0	0	0	0	0	0	0	0	0	0	0	0	369		Bacteria	Candidatus_Saccharibacteria	Unassigned	Unassigned	Unassigned	Saccharibacteria_genera_incertae_sedis	Unassigned
ASV_351	0	0	0	0	0	2	2	10	0	0	2	2	0	1	0	1	13	91	66	21	16	12	16	0	13	6	68	21	363		Bacteria	Planctomycetes	Planctomycetia	Planctomycetales	Planctomycetaceae	Blastopirellula	Blastopirellula_cremea
ASV_438	2	50	0	60	14	53	1	57	9	9	68	11	7	10	11	0	0	0	0	0	0	0	0	0	0	0	0	0	362		Bacteria	Candidatus_Saccharibacteria	Unassigned	Unassigned	Unassigned	Saccharibacteria_genera_incertae_sedis	Unassigned
ASV_538	0	20	0	7	48	114	32	18	34	4	19	32	1	18	0	14	1	0	0	0	0	0	0	0	0	0	0	0	362		Bacteria	Acidobacteria	Acidobacteria_Gp6	Unassigned	Unassigned	Gp6	Unassigned
ASV_328	0	2	3	0	0	0	0	0	0	0	0	0	0	0	35	1	7	3	4	0	7	31	0	0	0	0	14	254	361		Bacteria	Firmicutes	Bacilli	Bacillales	Planococcaceae	Paenisporosarcina	Paenisporosarcina_macmurdoensis
ASV_311	175	10	0	0	6	11	2	5	2	8	12	1	0	46	79	1	0	0	0	0	0	0	0	2	0	0	0	0	360		Bacteria	Proteobacteria	Alphaproteobacteria	Caulobacterales	Caulobacteraceae	Brevundimonas	Unassigned
ASV_476	79	0	14	12	19	11	1	0	4	40	7	11	2	39	40	66	9	1	2	0	0	0	1	0	0	0	0	1	359		Bacteria	Proteobacteria	Alphaproteobacteria	Sphingomonadales	Sphingomonadaceae	Sphingorhabdus	Sphingorhabdus_wooponensis
ASV_878	4	0	0	39	14	45	6	157	7	13	30	22	5	15	0	1	0	0	0	0	0	0	0	0	0	0	0	0	358		Bacteria	Candidatus_Saccharibacteria	Unassigned	Unassigned	Unassigned	Saccharibacteria_genera_incertae_sedis	Unassigned
ASV_382	0	8	0	72	21	19	15	11	21	8	61	43	14	32	10	18	1	1	0	0	0	0	0	0	0	0	0	0	355		Bacteria	Actinobacteria	Actinobacteria	Unassigned	Unassigned	Unassigned	Unassigned
ASV_436	0	21	0	50	9	30	8	41	19	14	46	46	17	30	4	15	1	1	2	0	0	0	1	0	0	0	0	0	355		Bacteria	Actinobacteria	Actinobacteria	Unassigned	Unassigned	Unassigned	Unassigned
ASV_320	0	12	0	1	0	2	0	0	0	5	2	2	0	2	1	0	2	2	7	7	23	3	2	163	26	45	28	18	353		Bacteria	Actinobacteria	Actinobacteria	Actinomycetales	Mycobacteriaceae	Mycobacterium	Unassigned
ASV_332	26	0	0	10	8	21	5	3	3	76	46	5	3	102	21	0	3	0	11	2	2	0	0	3	1	0	2	0	353		Bacteria	Proteobacteria	Alphaproteobacteria	Caulobacterales	Caulobacteraceae	Brevundimonas	Brevundimonas_basaltis
ASV_316	0	0	5	0	0	1	0	0	1	13	0	8	36	5	3	64	2	0	11	13	51	1	39	24	33	11	12	19	352		Bacteria	Bacteroidetes	Sphingobacteriia	Sphingobacteriales	Chitinophagaceae	Terrimonas	Unassigned
ASV_358	3	67	0	62	55	69	3	0	18	6	17	6	22	15	1	8	0	0	0	0	0	0	0	0	0	0	0	0	352		Bacteria	Proteobacteria	Betaproteobacteria	Methylophilales	Methylophilaceae	Methylotenera	Unassigned
ASV_1034	0	11	0	33	12	3	6	17	25	34	64	53	24	35	0	20	8	3	2	0	0	0	0	0	0	0	1	1	352		Bacteria	Verrucomicrobia	Spartobacteria	Unassigned	Unassigned	Spartobacteria_genera_incertae_sedis	Unassigned
ASV_327	138	0	0	2	0	80	3	2	0	15	7	1	0	92	10	0	0	0	0	0	0	0	0	0	0	0	1	0	351		Bacteria	Bacteroidetes	Flavobacteriia	Flavobacteriales	Flavobacteriaceae	Chryseobacterium	Unassigned
ASV_1004	8	0	2	27	14	112	15	34	14	5	49	53	11	7	0	0	0	0	0	0	0	0	0	0	0	0	0	0	351		Bacteria	Candidatus_Saccharibacteria	Unassigned	Unassigned	Unassigned	Saccharibacteria_genera_incertae_sedis	Unassigned
ASV_363	1	0	0	23	1	1	0	0	2	275	4	11	3	18	10	1	0	0	0	0	0	0	0	0	0	0	0	0	350		Bacteria	Deinococcus-Thermus	Deinococci	Deinococcales	Deinococcaceae	Deinococcus	Deinococcus_aquaticus
ASV_329	1	0	0	0	2	4	0	0	1	20	1	0	2	5	34	207	66	3	3	0	0	0	0	0	0	0	0	0	349		Bacteria	Proteobacteria	Alphaproteobacteria	Rhizobiales	Unassigned	Unassigned	Unassigned
ASV_342	5	0	1	67	15	36	4	22	12	31	70	48	15	15	4	1	0	3	0	0	0	0	0	0	0	0	0	0	349		Bacteria	Candidatus_Saccharibacteria	Unassigned	Unassigned	Unassigned	Saccharibacteria_genera_incertae_sedis	Unassigned
ASV_387	0	0	0	0	0	0	0	0	1	0	1	1	0	0	301	25	14	3	3	0	0	0	0	0	0	0	0	0	349		Bacteria	Verrucomicrobia	Verrucomicrobiae	Verrucomicrobiales	Verrucomicrobiaceae	Unassigned	Unassigned
ASV_405	23	4	3	5	4	10	7	4	3	62	40	2	6	59	25	17	3	2	9	0	4	7	0	42	2	0	5	1	349		Bacteria	Proteobacteria	Alphaproteobacteria	Caulobacterales	Caulobacteraceae	Brevundimonas	Brevundimonas_denitrificans
ASV_309	12	0	0	0	0	0	1	4	0	5	6	0	1	19	298	0	0	0	0	2	0	0	0	0	0	0	0	0	348		Bacteria	Bacteroidetes	Cytophagia	Cytophagales	Cytophagaceae	Hymenobacter	Hymenobacter_rigui
ASV_524	0	13	0	20	6	56	48	2	22	0	51	55	15	44	1	13	1	0	0	0	0	0	0	0	0	0	0	0	347		Bacteria	Actinobacteria	Actinobacteria	Unassigned	Unassigned	Unassigned	Unassigned
ASV_305	0	0	0	0	0	0	0	0	0	0	0	0	0	0	0	0	7	2	6	3	1	9	3	270	10	7	6	21	345		Bacteria	Actinobacteria	Actinobacteria	Actinomycetales	Microbacteriaceae	Unassigned	Unassigned
ASV_1468	0	0	0	36	18	12	117	6	47	4	30	35	14	20	0	6	0	0	0	0	0	0	0	0	0	0	0	0	345		Bacteria	Acidobacteria	Acidobacteria_Gp6	Unassigned	Unassigned	Gp6	Unassigned
ASV_423	0	0	0	33	47	32	42	0	38	5	59	43	11	21	5	8	0	0	0	0	0	0	0	0	0	0	0	0	344		Bacteria	Acidobacteria	Acidobacteria_Gp6	Unassigned	Unassigned	Gp6	Unassigned
ASV_315	0	0	0	0	0	0	0	0	0	0	0	0	0	0	0	0	2	1	16	0	2	3	1	310	0	0	1	7	343		Bacteria	Bacteroidetes	Cytophagia	Cytophagales	Unassigned	Unassigned	Unassigned
ASV_355	0	28	0	20	9	57	8	17	29	31	34	53	16	35	1	4	0	1	0	0	0	0	0	0	0	0	0	0	343		Bacteria	Acidobacteria	Acidobacteria_Gp6	Unassigned	Unassigned	Gp6	Unassigned
ASV_4177	0	0	306	0	0	0	0	0	1	4	0	0	15	0	0	13	0	0	0	0	1	0	0	2	0	0	0	1	343		Bacteria	Proteobacteria	Betaproteobacteria	Burkholderiales	Unassigned	Unassigned	Unassigned
ASV_422	32	4	0	67	182	11	2	0	3	3	18	0	0	5	15	0	0	0	0	0	0	0	0	0	0	0	0	0	342		Bacteria	Bacteroidetes	Sphingobacteriia	Sphingobacteriales	Chitinophagaceae	Ferruginibacter	Ferruginibacter_yonginensis
ASV_402	122	19	0	13	6	4	0	1	0	2	11	1	0	17	145	0	0	0	0	0	0	0	0	0	0	0	0	0	341		Bacteria	Bacteroidetes	Cytophagia	Cytophagales	Cytophagaceae	Hymenobacter	Hymenobacter_glaciei
ASV_973	1	0	0	5	1	1	1	252	4	4	33	25	7	4	2	1	0	0	0	0	0	0	0	0	0	0	0	0	341		Bacteria	Candidatus_Saccharibacteria	Unassigned	Unassigned	Unassigned	Saccharibacteria_genera_incertae_sedis	Unassigned
ASV_1499	0	0	0	0	0	0	0	0	0	0	0	0	0	0	0	0	3	3	19	49	26	10	26	118	26	14	15	29	338		Bacteria	Proteobacteria	Betaproteobacteria	Burkholderiales	Unassigned	Unassigned	Unassigned
ASV_392	0	0	0	16	3	2	2	43	17	25	52	54	20	64	3	25	11	0	0	0	0	0	0	0	0	0	0	0	337		Bacteria	Actinobacteria	Unassigned	Unassigned	Unassigned	Unassigned	Unassigned
ASV_605	0	5	0	53	65	27	10	2	39	3	47	41	7	18	11	9	0	0	0	0	0	0	0	0	0	0	0	0	337		Bacteria	Acidobacteria	Acidobacteria_Gp6	Unassigned	Unassigned	Gp6	Unassigned
ASV_324	0	13	197	0	0	0	0	1	2	39	3	6	55	2	0	8	1	1	0	0	0	8	0	0	0	0	0	0	336		Bacteria	Proteobacteria	Betaproteobacteria	Burkholderiales	Burkholderiaceae	Polynucleobacter	Polynucleobacter_necessarius_subsp._asymbioticus
ASV_5183	0	0	325	0	0	0	0	0	0	1	0	0	1	0	0	6	1	0	0	0	0	0	0	0	0	0	0	0	334		Bacteria	Actinobacteria	Actinobacteria	Actinomycetales	Microbacteriaceae	Rhodoluna	Rhodoluna_lacicola
ASV_385	0	31	0	32	12	86	32	3	11	3	40	31	18	27	1	5	0	0	0	0	0	0	0	0	0	0	0	0	332		Bacteria	Actinobacteria	Actinobacteria	Unassigned	Unassigned	Unassigned	Unassigned
ASV_339	0	0	0	0	2	14	0	0	1	10	0	1	9	1	0	184	76	23	9	0	0	0	0	0	0	0	0	0	330		Bacteria	Proteobacteria	Betaproteobacteria	Burkholderiales	Alcaligenaceae	Unassigned	Unassigned
ASV_352	0	0	0	0	0	0	0	0	0	0	0	0	0	0	0	0	24	70	79	30	16	23	19	1	15	13	23	17	330		Bacteria	Planctomycetes	Planctomycetia	Planctomycetales	Planctomycetaceae	Unassigned	Unassigned
ASV_660	0	13	0	33	13	34	62	3	41	6	34	35	21	22	2	10	0	0	0	0	0	0	0	0	0	0	0	0	329		Bacteria	Acidobacteria	Acidobacteria_Gp6	Unassigned	Unassigned	Gp6	Unassigned
ASV_326	0	2	9	0	0	0	0	0	0	0	1	0	0	1	0	0	1	0	0	0	0	0	0	0	0	0	313	0	327		Bacteria	Candidatus_Saccharibacteria	Unassigned	Unassigned	Unassigned	Saccharibacteria_genera_incertae_sedis	Unassigned
ASV_344	0	0	0	0	0	0	0	2	0	0	1	0	0	0	0	0	1	0	0	0	0	0	0	0	1	0	321	0	326		Bacteria	Candidatus_Saccharibacteria	Unassigned	Unassigned	Unassigned	Saccharibacteria_genera_incertae_sedis	Unassigned
ASV_371	0	0	67	0	0	0	0	0	1	4	0	0	2	0	1	12	6	3	4	2	3	6	8	139	14	18	6	30	326		Bacteria	Actinobacteria	Actinobacteria	Actinomycetales	Microbacteriaceae	Unassigned	Unassigned
ASV_1388	39	73	0	74	0	18	0	0	1	9	24	0	0	70	18	0	0	0	0	0	0	0	0	0	0	0	0	0	326		Bacteria	Bacteroidetes	Cytophagia	Cytophagales	Cytophagaceae	Hymenobacter	Unassigned
ASV_345	10	1	0	43	192	35	0	0	6	0	7	5	7	9	6	4	0	0	0	0	0	0	0	0	0	0	0	0	325		Bacteria	Proteobacteria	Betaproteobacteria	Burkholderiales	Comamonadaceae	Unassigned	Unassigned
ASV_349	0	0	0	0	0	0	0	0	0	0	0	0	0	0	0	0	14	82	28	12	13	7	3	14	36	28	28	60	325		Bacteria	Chloroflexi	Caldilineae	Caldilineales	Caldilineaceae	Unassigned	Unassigned
ASV_368	279	14	0	2	0	5	1	4	0	4	2	2	0	8	3	0	0	0	0	0	0	0	0	0	0	0	0	0	324		Bacteria	Proteobacteria	Alphaproteobacteria	Sphingomonadales	Sphingomonadaceae	Sphingomonas	Sphingomonas_faeni
ASV_367	259	11	0	5	5	1	2	7	2	1	3	4	0	14	9	0	0	0	0	0	0	0	0	0	0	0	0	0	323		Bacteria	Proteobacteria	Alphaproteobacteria	Sphingomonadales	Sphingomonadaceae	Sphingomonas	Unassigned
ASV_346	0	0	2	0	1	0	0	0	0	5	0	0	0	2	3	20	4	1	4	5	17	10	9	139	14	46	15	25	322		Bacteria	Proteobacteria	Betaproteobacteria	Burkholderiales	Alcaligenaceae	Unassigned	Unassigned
ASV_383	1	0	0	0	0	0	0	0	0	3	0	0	0	0	9	0	1	1	3	2	24	65	0	0	0	8	44	161	322		Bacteria	Firmicutes	Bacilli	Bacillales	Planococcaceae	Paenisporosarcina	Paenisporosarcina_antarctica
ASV_399	0	0	0	0	0	0	0	0	0	1	0	0	0	2	0	0	12	5	0	4	8	16	14	188	27	14	6	25	322		Bacteria	Actinobacteria	Actinobacteria	Actinomycetales	Microbacteriaceae	Pontimonas	Pontimonas_salivibrio
ASV_362	1	0	139	4	0	2	7	14	18	12	66	49	1	4	3	1	0	0	0	0	0	0	0	0	0	0	0	0	321		Bacteria	Parcubacteria	Unassigned	Unassigned	Unassigned	Parcubacteria_genera_incertae_sedis	Unassigned
ASV_732	0	0	2	0	0	0	0	0	0	33	0	0	0	2	13	2	0	0	1	0	10	32	0	0	0	0	45	181	321		Bacteria	Firmicutes	Bacilli	Bacillales	Planococcaceae	Unassigned	Unassigned
ASV_343	0	0	308	0	0	0	0	0	2	0	0	4	2	2	0	1	0	0	0	0	0	0	0	0	0	0	0	0	319		Bacteria	Bacteroidetes	Flavobacteriia	Flavobacteriales	Flavobacteriaceae	Flavobacterium	Unassigned
ASV_1533	0	0	0	0	0	0	0	0	0	0	0	0	0	0	0	0	250	0	0	0	0	69	0	0	0	0	0	0	319		Bacteria	Candidatus_Saccharibacteria	Unassigned	Unassigned	Unassigned	Saccharibacteria_genera_incertae_sedis	Unassigned
ASV_2112	33	0	0	68	110	15	6	0	14	10	26	3	3	24	2	3	1	0	0	0	0	0	0	0	0	0	0	0	318		Bacteria	Bacteroidetes	Sphingobacteriia	Sphingobacteriales	Chitinophagaceae	Unassigned	Unassigned
ASV_364	0	0	0	0	0	0	0	0	0	2	0	0	0	1	0	1	10	18	20	24	33	19	6	29	8	7	31	108	317		Bacteria	Proteobacteria	Alphaproteobacteria	Rhodospirillales	Acetobacteraceae	Roseomonas	Unassigned
ASV_391	0	0	0	2	3	1	1	5	2	1	9	2	0	2	199	81	8	1	0	0	0	0	0	0	0	0	0	0	317		Bacteria	Planctomycetes	Planctomycetia	Planctomycetales	Planctomycetaceae	Unassigned	Unassigned
ASV_366	0	0	0	0	0	0	0	0	0	0	0	0	0	0	4	184	119	3	6	0	0	0	0	0	0	0	0	0	316		Bacteria	Armatimonadetes	Armatimonadia	Armatimonadales	Armatimonadaceae	Armatimonas/Armatimonadetes_gp1	Unassigned
ASV_393	0	0	0	0	0	0	0	0	0	0	0	0	0	0	0	0	4	4	4	6	22	0	11	173	17	24	12	39	316		Bacteria	Actinobacteria	Actinobacteria	Unassigned	Unassigned	Unassigned	Unassigned
ASV_444	5	0	0	47	13	88	7	20	8	5	62	31	14	11	1	0	0	0	0	0	0	0	0	0	0	0	0	0	312		Bacteria	Candidatus_Saccharibacteria	Unassigned	Unassigned	Unassigned	Saccharibacteria_genera_incertae_sedis	Unassigned
ASV_1882	0	0	0	0	2	0	0	11	10	4	1	8	12	9	0	103	33	64	42	0	0	2	0	0	0	0	1	10	312		Bacteria	Verrucomicrobia	Verrucomicrobiae	Verrucomicrobiales	Verrucomicrobiaceae	Prosthecobacter	Prosthecobacter_vanneervenii
ASV_5960	216	30	1	0	0	16	2	1	3	5	2	5	24	1	3	2	0	0	0	0	0	0	0	0	0	0	0	0	311		Bacteria	Parcubacteria	Unassigned	Unassigned	Unassigned	Parcubacteria_genera_incertae_sedis	Unassigned
ASV_331	34	206	0	0	2	10	3	0	0	0	0	1	0	1	29	1	1	1	0	1	4	1	1	13	0	0	0	0	309		Bacteria	Proteobacteria	Gammaproteobacteria	Enterobacteriales	Enterobacteriaceae	Serratia	Serratia_liquefaciens
ASV_417	3	0	0	0	0	1	1	2	0	81	4	2	3	0	191	2	1	1	0	0	0	0	2	0	0	15	0	0	309		Bacteria	Firmicutes	Bacilli	Bacillales	Bacillales_Incertae_Sedis_XII	Exiguobacterium	Exiguobacterium_artemiae
ASV_365	0	0	0	0	0	0	0	0	0	0	0	0	0	0	0	0	27	64	25	20	9	6	10	15	26	43	19	44	308		Bacteria	Chloroflexi	Caldilineae	Caldilineales	Caldilineaceae	Unassigned	Unassigned
ASV_376	15	4	0	34	162	78	0	0	3	1	1	1	1	3	5	0	0	0	0	0	0	0	0	0	0	0	0	0	308		Bacteria	Proteobacteria	Betaproteobacteria	Burkholderiales	Comamonadaceae	Polaromonas	Polaromonas_aquatica
ASV_400	0	22	0	53	20	35	4	34	11	3	54	17	6	15	0	21	3	0	5	1	0	0	0	0	1	0	0	3	308		Bacteria	Verrucomicrobia	Spartobacteria	Unassigned	Unassigned	Spartobacteria_genera_incertae_sedis	Unassigned
ASV_384	0	19	0	49	30	68	4	10	21	14	44	23	8	8	1	7	0	1	0	0	0	0	0	0	0	0	0	0	307		Bacteria	Acidobacteria	Acidobacteria_Gp4	Unassigned	Unassigned	Aridibacter	Aridibacter_famidurans
ASV_414	0	0	70	0	0	0	0	0	0	6	0	0	2	0	0	10	8	2	5	1	4	7	5	131	16	14	5	21	307		Bacteria	Actinobacteria	Actinobacteria	Actinomycetales	Microbacteriaceae	Unassigned	Unassigned
ASV_474	0	0	0	0	0	0	0	0	86	145	49	25	2	0	0	0	0	0	0	0	0	0	0	0	0	0	0	0	307		Bacteria	Candidatus_Saccharibacteria	Unassigned	Unassigned	Unassigned	Saccharibacteria_genera_incertae_sedis	Unassigned
ASV_354	1	268	0	0	0	2	0	1	1	27	0	0	0	0	2	0	1	3	0	0	0	0	0	0	0	0	0	0	306		Bacteria	Firmicutes	Bacilli	Lactobacillales	Carnobacteriaceae	Carnobacterium	Unassigned
ASV_426	71	126	0	9	2	4	2	3	0	5	16	2	2	37	27	0	0	0	0	0	0	0	0	0	0	0	0	0	306		Bacteria	Bacteroidetes	Cytophagia	Cytophagales	Cytophagaceae	Hymenobacter	Hymenobacter_elongatus
ASV_3141	0	0	0	0	0	0	0	0	0	0	0	0	0	0	0	0	3	98	16	19	14	13	19	9	30	42	24	18	305		Bacteria	Verrucomicrobia	Spartobacteria	Unassigned	Unassigned	Spartobacteria_genera_incertae_sedis	Unassigned
ASV_437	3	123	0	0	1	120	2	0	4	0	8	21	10	2	2	7	0	1	0	0	0	0	0	0	0	0	0	0	304		Bacteria	Parcubacteria	Unassigned	Unassigned	Unassigned	Parcubacteria_genera_incertae_sedis	Unassigned
ASV_455	14	1	16	29	140	24	1	0	13	3	6	3	12	4	7	27	0	0	0	0	0	0	0	1	0	0	2	0	303		Bacteria	Proteobacteria	Betaproteobacteria	Burkholderiales	Comamonadaceae	Variovorax	Unassigned
ASV_424	0	0	1	0	0	0	0	0	0	0	1	0	0	0	0	0	1	0	43	0	1	0	0	2	0	0	22	229	300		Bacteria	Verrucomicrobia	Verrucomicrobiae	Verrucomicrobiales	Verrucomicrobiaceae	Luteolibacter	Unassigned
ASV_550	0	9	0	66	21	13	62	0	22	3	33	27	8	33	1	2	0	0	0	0	0	0	0	0	0	0	0	0	300		Bacteria	Acidobacteria	Acidobacteria_Gp4	Unassigned	Unassigned	Gp4	Unassigned
ASV_1674	22	0	1	45	10	5	7	52	5	45	35	11	49	7	4	2	0	0	0	0	0	0	0	0	0	0	0	0	300		Bacteria	Verrucomicrobia	Verrucomicrobiae	Verrucomicrobiales	Verrucomicrobiaceae	Luteolibacter	Unassigned
ASV_485	0	178	1	0	1	69	3	0	5	1	10	15	4	3	1	8	0	0	0	0	0	0	0	0	0	0	0	0	299		Bacteria	Parcubacteria	Unassigned	Unassigned	Unassigned	Parcubacteria_genera_incertae_sedis	Unassigned
ASV_408	26	3	0	1	12	37	1	0	5	40	32	1	3	87	22	2	0	10	0	0	0	2	3	7	3	0	1	0	298		Bacteria	Proteobacteria	Alphaproteobacteria	Caulobacterales	Caulobacteraceae	Brevundimonas	Unassigned
ASV_3442	13	0	0	0	3	0	0	0	0	4	3	2	4	4	21	4	1	7	1	1	8	19	5	188	8	0	2	0	298		Bacteria	Proteobacteria	Alphaproteobacteria	Caulobacterales	Caulobacteraceae	Brevundimonas	Unassigned
ASV_369	0	0	1	0	0	0	0	0	0	2	1	0	0	1	4	13	8	4	4	3	17	5	5	110	15	48	20	36	297		Bacteria	Proteobacteria	Betaproteobacteria	Burkholderiales	Alcaligenaceae	Unassigned	Unassigned
ASV_375	0	0	0	0	0	0	0	0	0	0	0	0	0	0	0	0	41	99	37	9	3	4	11	7	8	21	17	38	295		Bacteria	Verrucomicrobia	Spartobacteria	Unassigned	Unassigned	Unassigned	Unassigned
ASV_415	15	8	0	18	97	138	1	0	3	1	4	3	1	3	2	1	0	0	0	0	0	0	0	0	0	0	0	0	295		Bacteria	Proteobacteria	Betaproteobacteria	Burkholderiales	Comamonadaceae	Polaromonas	Polaromonas_aquatica
ASV_497	0	0	3	16	2	31	7	17	16	60	62	41	14	22	3	0	0	0	0	0	0	1	0	0	0	0	0	0	295		Bacteria	Candidatus_Saccharibacteria	Unassigned	Unassigned	Unassigned	Saccharibacteria_genera_incertae_sedis	Unassigned
ASV_599	0	0	0	3	1	0	2	16	9	43	16	16	5	13	1	2	0	32	24	22	13	13	10	1	7	3	26	17	295		Bacteria	Planctomycetes	Planctomycetia	Planctomycetales	Planctomycetaceae	Rhodopirellula	Rhodopirellula_rosea
ASV_359	0	0	283	0	0	0	0	0	1	2	1	2	4	0	0	1	0	0	0	0	0	0	0	0	0	0	0	0	294		Bacteria	Bacteroidetes	Flavobacteriia	Flavobacteriales	Flavobacteriaceae	Flavobacterium	Unassigned
ASV_507	0	7	0	13	7	41	41	0	42	0	56	47	19	18	1	2	0	0	0	0	0	0	0	0	0	0	0	0	294		Bacteria	Unassigned	Unassigned	Unassigned	Unassigned	Unassigned	Unassigned
ASV_517	0	21	0	9	28	100	21	0	29	2	38	19	14	8	0	5	0	0	0	0	0	0	0	0	0	0	0	0	294		Bacteria	Acidobacteria	Acidobacteria_Gp6	Unassigned	Unassigned	Gp6	Unassigned
ASV_746	0	0	0	0	0	0	0	0	0	0	0	0	0	0	0	0	23	130	35	17	6	7	3	3	12	16	25	17	294		Bacteria	Verrucomicrobia	Spartobacteria	Unassigned	Unassigned	Unassigned	Unassigned
ASV_766	0	0	1	4	0	3	0	18	88	9	24	68	4	38	4	18	15	0	0	0	0	0	0	0	0	0	0	0	294		Bacteria	Acidobacteria	Acidobacteria_Gp6	Unassigned	Unassigned	Gp6	Unassigned
ASV_781	0	0	0	11	10	5	13	4	64	26	34	65	31	12	0	19	0	0	0	0	0	0	0	0	0	0	0	0	294		Bacteria	Acidobacteria	Acidobacteria_Gp6	Unassigned	Unassigned	Gp6	Unassigned
ASV_411	0	0	0	0	0	0	0	0	0	0	0	0	0	0	0	0	11	7	4	2	17	19	7	169	13	12	6	26	293		Bacteria	Actinobacteria	Actinobacteria	Actinomycetales	Microbacteriaceae	Pontimonas	Pontimonas_salivibrio
ASV_1372	0	0	0	0	0	0	0	0	0	14	0	0	0	0	1	0	0	0	0	74	0	0	0	0	0	0	0	203	292		Bacteria	Firmicutes	Bacilli	Unassigned	Unassigned	Unassigned	Unassigned
ASV_695	0	0	1	41	11	10	8	32	26	9	41	28	16	25	0	38	1	0	0	0	1	0	3	0	0	0	0	0	291		Bacteria	Acidobacteria	Acidobacteria_Gp6	Unassigned	Unassigned	Gp6	Unassigned
ASV_390	0	0	1	6	0	0	2	232	10	9	11	12	3	4	0	0	0	0	0	0	0	0	0	0	0	0	0	0	290		Bacteria	Candidatus_Saccharibacteria	Unassigned	Unassigned	Unassigned	Saccharibacteria_genera_incertae_sedis	Unassigned
ASV_512	2	39	0	11	27	47	25	0	31	4	35	22	12	28	3	4	0	0	0	0	0	0	0	0	0	0	0	0	290		Bacteria	Acidobacteria	Acidobacteria_Gp4	Unassigned	Unassigned	Gp4	Unassigned
ASV_508	0	0	0	51	16	22	23	1	29	11	44	25	14	29	1	23	0	0	0	0	0	0	0	0	0	0	0	0	289		Bacteria	Acidobacteria	Acidobacteria_Gp4	Unassigned	Unassigned	Aridibacter	Aridibacter_famidurans
ASV_361	0	0	0	0	0	0	0	0	0	0	0	0	0	0	0	0	288	0	0	0	0	0	0	0	0	0	0	0	288		Bacteria	Candidatus_Saccharibacteria	Unassigned	Unassigned	Unassigned	Saccharibacteria_genera_incertae_sedis	Unassigned
ASV_403	0	3	0	19	89	17	54	0	47	0	28	10	1	13	4	3	0	0	0	0	0	0	0	0	0	0	0	0	288		Bacteria	Acidobacteria	Acidobacteria_Gp4	Unassigned	Unassigned	Gp4	Unassigned
ASV_500	5	0	0	42	13	17	13	39	18	15	44	32	16	18	3	13	0	0	0	0	0	0	0	0	0	0	0	0	288		Bacteria	Verrucomicrobia	Spartobacteria	Unassigned	Unassigned	Spartobacteria_genera_incertae_sedis	Unassigned
ASV_842	0	2	0	32	47	43	16	3	38	3	21	51	4	12	8	8	0	0	0	0	0	0	0	0	0	0	0	0	288		Bacteria	Acidobacteria	Acidobacteria_Gp6	Unassigned	Unassigned	Gp6	Unassigned
ASV_435	0	32	0	27	4	62	9	2	13	41	34	34	17	10	2	0	0	0	0	0	0	0	0	0	0	0	0	0	287		Bacteria	Candidatus_Saccharibacteria	Unassigned	Unassigned	Unassigned	Saccharibacteria_genera_incertae_sedis	Unassigned
ASV_440	0	0	0	0	0	0	0	0	6	1	2	8	15	14	15	215	9	0	0	0	0	0	0	0	0	0	0	0	285		Bacteria	Verrucomicrobia	Verrucomicrobiae	Verrucomicrobiales	Verrucomicrobiaceae	Prosthecobacter	Prosthecobacter_algae
ASV_470	1	0	0	0	1	98	0	0	0	180	1	1	1	0	1	0	0	0	0	0	0	0	0	0	0	0	0	0	284		Bacteria	Firmicutes	Bacilli	Bacillales	Planococcaceae	Unassigned	Unassigned
ASV_439	1	1	0	0	0	0	1	1	0	8	1	0	0	1	263	0	2	0	0	0	0	0	0	0	0	4	0	0	283		Bacteria	Firmicutes	Bacilli	Bacillales	Bacillales_Incertae_Sedis_XII	Exiguobacterium	Exiguobacterium_artemiae
ASV_5868	6	1	125	2	1	0	0	1	1	39	2	3	4	9	1	76	10	0	2	0	0	0	0	0	0	0	0	0	283		Bacteria	Proteobacteria	Alphaproteobacteria	Rhodobacterales	Rhodobacteraceae	Unassigned	Unassigned
ASV_388	0	0	0	0	0	0	0	0	0	0	0	0	0	0	0	0	8	1	8	1	2	3	2	241	1	0	0	15	282		Bacteria	Bacteroidetes	Cytophagia	Cytophagales	Unassigned	Unassigned	Unassigned
ASV_604	0	0	0	25	43	11	105	1	22	0	23	10	0	23	12	4	0	1	0	0	0	0	0	0	0	0	0	0	280		Bacteria	Acidobacteria	Acidobacteria_Gp4	Unassigned	Unassigned	Gp4	Unassigned
ASV_534	0	0	54	0	0	0	0	1	0	60	0	3	16	1	0	58	15	2	10	1	4	1	1	16	9	15	4	7	278		Bacteria	Proteobacteria	Alphaproteobacteria	Rhodobacterales	Rhodobacteraceae	Tabrizicola	Tabrizicola_aquatica
ASV_1163	5	0	3	10	6	24	10	80	19	15	51	30	7	16	1	1	0	0	0	0	0	0	0	0	0	0	0	0	278		Bacteria	Candidatus_Saccharibacteria	Unassigned	Unassigned	Unassigned	Saccharibacteria_genera_incertae_sedis	Unassigned
ASV_462	1	0	0	18	13	13	48	0	40	5	39	38	30	23	3	5	0	1	0	0	0	0	0	0	0	0	0	0	277		Bacteria	Acidobacteria	Acidobacteria_Gp7	Unassigned	Unassigned	Gp7	Unassigned
ASV_488	0	0	0	0	0	0	0	0	0	0	0	0	0	0	0	0	3	15	30	8	1	31	3	0	27	156	3	0	277		Unassigned	Unassigned	Unassigned	Unassigned	Unassigned	Unassigned	Unassigned
ASV_1132	0	4	0	40	10	0	34	0	43	3	28	11	1	9	86	4	2	2	0	0	0	0	0	0	0	0	0	0	277		Bacteria	Unassigned	Unassigned	Unassigned	Unassigned	Unassigned	Unassigned
ASV_427	0	0	1	2	2	2	0	1	0	44	1	0	0	3	65	4	1	1	1	116	0	8	0	1	0	5	17	1	276		Bacteria	Deinococcus-Thermus	Deinococci	Deinococcales	Deinococcaceae	Deinococcus	Deinococcus_depolymerans
ASV_509	15	5	0	88	24	61	8	0	9	14	15	1	9	19	8	0	0	0	0	0	0	0	0	0	0	0	0	0	276		Bacteria	Proteobacteria	Alphaproteobacteria	Sphingomonadales	Sphingomonadaceae	Sphingomonas	Unassigned
ASV_591	0	0	0	1	0	0	2	0	28	135	46	43	7	4	6	0	0	0	0	0	0	0	0	0	0	0	4	0	276		Bacteria	Candidatus_Saccharibacteria	Unassigned	Unassigned	Unassigned	Saccharibacteria_genera_incertae_sedis	Unassigned
ASV_2902	3	162	2	0	0	2	4	5	9	26	2	8	6	0	0	0	1	0	0	2	0	42	1	1	0	0	0	0	276		Bacteria	Candidatus_Saccharibacteria	Unassigned	Unassigned	Unassigned	Saccharibacteria_genera_incertae_sedis	Unassigned
ASV_378	0	0	0	0	0	0	0	0	0	0	0	0	0	0	0	0	274	0	0	0	0	0	0	0	0	1	0	0	275		Bacteria	Candidatus_Saccharibacteria	Unassigned	Unassigned	Unassigned	Saccharibacteria_genera_incertae_sedis	Unassigned
ASV_421	98	17	0	7	4	2	2	3	0	0	8	1	0	35	98	0	0	0	0	0	0	0	0	0	0	0	0	0	275		Bacteria	Bacteroidetes	Cytophagia	Cytophagales	Cytophagaceae	Hymenobacter	Unassigned
ASV_521	0	0	0	5	0	0	1	1	1	4	3	2	1	6	24	172	29	10	3	2	2	1	0	0	2	0	5	1	275		Bacteria	Planctomycetes	Planctomycetia	Planctomycetales	Planctomycetaceae	Pirellula	Pirellula_staleyi
ASV_548	1	8	0	48	57	51	13	1	18	2	35	11	8	9	2	8	0	0	1	0	0	0	1	0	0	0	0	0	274		Bacteria	Verrucomicrobia	Spartobacteria	Unassigned	Unassigned	Spartobacteria_genera_incertae_sedis	Unassigned
ASV_466	15	1	24	16	39	15	0	14	14	15	3	8	70	3	0	28	1	0	0	0	0	0	0	5	0	0	2	0	273		Bacteria	Proteobacteria	Betaproteobacteria	Burkholderiales	Comamonadaceae	Variovorax	Variovorax_guangxiensis
ASV_498	1	0	0	11	1	0	0	213	3	2	19	15	4	4	0	0	0	0	0	0	0	0	0	0	0	0	0	0	273		Bacteria	Candidatus_Saccharibacteria	Unassigned	Unassigned	Unassigned	Saccharibacteria_genera_incertae_sedis	Unassigned
ASV_515	17	0	2	16	134	70	2	0	4	1	7	4	0	3	11	2	0	0	0	0	0	0	0	0	0	0	0	0	273		Bacteria	Proteobacteria	Betaproteobacteria	Burkholderiales	Comamonadaceae	Polaromonas	Polaromonas_aquatica
ASV_479	27	3	0	46	127	38	1	0	2	1	11	2	0	7	6	0	0	0	0	0	0	0	0	0	0	0	0	0	271		Bacteria	Bacteroidetes	Sphingobacteriia	Sphingobacteriales	Chitinophagaceae	Ferruginibacter	Ferruginibacter_yonginensis
ASV_2870	0	245	0	0	0	9	0	0	2	0	1	9	3	0	0	2	0	0	0	0	0	0	0	0	0	0	0	0	271		Bacteria	Unassigned	Unassigned	Unassigned	Unassigned	Unassigned	Unassigned
ASV_396	0	0	3	1	0	0	0	1	0	0	0	0	1	0	0	0	34	0	18	0	0	0	0	0	1	0	211	0	270		Bacteria	Actinobacteria	Actinobacteria	Unassigned	Unassigned	Unassigned	Unassigned
ASV_412	38	94	0	0	2	10	0	1	0	0	0	1	0	1	20	0	1	0	0	0	8	1	0	88	5	0	0	0	270		Bacteria	Actinobacteria	Actinobacteria	Actinomycetales	Nocardiaceae	Rhodococcus	Unassigned
ASV_564	13	0	0	71	60	21	2	0	17	15	22	5	4	35	2	0	1	0	0	0	0	0	0	0	0	0	0	1	269		Bacteria	Bacteroidetes	Sphingobacteriia	Sphingobacteriales	Chitinophagaceae	Ferruginibacter	Ferruginibacter_yonginensis
ASV_443	0	2	0	1	9	27	58	0	9	3	39	52	29	34	3	2	0	0	0	0	0	0	0	0	0	0	0	0	268		Bacteria	Unassigned	Unassigned	Unassigned	Unassigned	Unassigned	Unassigned
ASV_970	0	22	1	28	21	33	16	0	60	7	19	27	10	17	0	7	0	0	0	0	0	0	0	0	0	0	0	0	268		Bacteria	Acidobacteria	Acidobacteria_Gp6	Unassigned	Unassigned	Gp6	Unassigned
ASV_1172	0	0	2	5	0	9	0	4	90	28	33	49	18	16	0	10	3	1	0	0	0	0	0	0	0	0	0	0	268		Bacteria	Acidobacteria	Acidobacteria_Gp6	Unassigned	Unassigned	Gp6	Unassigned
ASV_469	0	0	0	19	8	52	13	1	19	5	58	26	15	37	7	6	1	0	0	0	0	0	0	0	0	0	0	0	267		Bacteria	Unassigned	Unassigned	Unassigned	Unassigned	Unassigned	Unassigned
ASV_503	0	0	3	0	0	2	0	0	28	6	6	28	43	4	1	134	4	0	2	0	0	0	0	1	2	0	0	1	265		Bacteria	Bacteroidetes	Cytophagia	Cytophagales	Cytophagaceae	Pseudarcicella	Pseudarcicella_hirudinis
ASV_598	1	0	0	1	2	23	2	0	0	2	106	87	17	22	2	0	0	0	0	0	0	0	0	0	0	0	0	0	265		Bacteria	Candidatus_Saccharibacteria	Unassigned	Unassigned	Unassigned	Saccharibacteria_genera_incertae_sedis	Unassigned
ASV_401	0	0	3	0	0	0	0	240	3	1	8	3	3	2	1	0	0	0	0	0	0	0	0	0	0	0	0	0	264		Bacteria	Unassigned	Unassigned	Unassigned	Unassigned	Unassigned	Unassigned
ASV_441	0	0	5	1	1	2	0	8	0	144	3	3	11	19	1	54	10	0	0	0	1	0	0	0	0	0	0	0	263		Bacteria	Proteobacteria	Alphaproteobacteria	Rhodobacterales	Rhodobacteraceae	Unassigned	Unassigned
ASV_813	0	6	0	14	42	9	15	2	34	4	33	32	3	14	5	43	5	2	0	0	0	0	0	0	0	0	0	0	263		Bacteria	Acidobacteria	Acidobacteria_Gp6	Unassigned	Unassigned	Gp6	Unassigned
ASV_544	0	0	1	0	0	1	0	0	0	1	0	1	27	2	9	208	10	2	0	0	0	0	0	0	0	0	0	0	262		Bacteria	Proteobacteria	Betaproteobacteria	Burkholderiales	Comamonadaceae	Comamonas	Comamonas_guangdongensis
ASV_3993	0	0	236	0	0	0	0	0	2	2	0	1	6	0	0	9	0	0	0	1	0	0	1	4	0	0	0	0	262		Bacteria	Proteobacteria	Betaproteobacteria	Burkholderiales	Unassigned	Unassigned	Unassigned
ASV_482	3	1	177	0	2	4	0	1	15	3	1	2	20	3	0	26	0	0	0	0	0	0	1	2	0	0	0	0	261		Bacteria	Proteobacteria	Betaproteobacteria	Burkholderiales	Comamonadaceae	Unassigned	Unassigned
ASV_519	0	0	0	4	8	0	1	0	36	28	35	27	9	23	5	79	4	2	0	0	0	0	0	0	0	0	0	0	261		Bacteria	Acidobacteria	Acidobacteria_Gp4	Unassigned	Unassigned	Aridibacter	Aridibacter_famidurans
ASV_809	0	26	0	24	13	19	89	0	25	2	16	25	3	14	0	5	0	0	0	0	0	0	0	0	0	0	0	0	261		Bacteria	Acidobacteria	Acidobacteria_Gp6	Unassigned	Unassigned	Gp6	Unassigned
ASV_533	0	0	0	1	1	0	0	0	1	0	6	0	0	0	1	0	1	0	181	0	0	0	0	0	0	0	68	0	260		Bacteria	Planctomycetes	Planctomycetia	Planctomycetales	Planctomycetaceae	Unassigned	Unassigned
ASV_433	239	0	0	0	0	4	0	0	0	0	0	0	0	0	0	2	2	0	0	0	0	0	0	6	3	1	0	2	259		Bacteria	Proteobacteria	Alphaproteobacteria	Sphingomonadales	Sphingomonadaceae	Blastomonas	Blastomonas_natatoria
ASV_499	4	0	0	0	0	0	0	0	0	0	1	0	0	24	0	0	0	219	0	6	0	0	0	2	2	0	0	0	258		Bacteria	Proteobacteria	Alphaproteobacteria	Caulobacterales	Caulobacteraceae	Brevundimonas	Brevundimonas_bacteroides
ASV_395	0	0	0	0	0	0	0	0	0	0	0	0	0	0	0	0	6	4	246	0	0	0	0	0	0	0	0	1	257		Bacteria	Unassigned	Unassigned	Unassigned	Unassigned	Unassigned	Unassigned
ASV_487	5	9	40	4	5	138	0	14	0	2	12	0	6	18	4	0	0	0	0	0	0	0	0	0	0	0	0	0	257		Bacteria	Bacteroidetes	Flavobacteriia	Flavobacteriales	Flavobacteriaceae	Flavobacterium	Unassigned
ASV_1387	3	17	0	19	14	42	15	39	10	13	26	35	12	7	0	4	0	0	0	0	0	0	0	0	0	0	0	0	256		Bacteria	Candidatus_Saccharibacteria	Unassigned	Unassigned	Unassigned	Saccharibacteria_genera_incertae_sedis	Unassigned
ASV_523	2	0	0	9	59	17	28	0	96	5	11	10	3	8	4	1	2	0	0	0	0	0	0	0	0	0	0	0	255		Archaea	Thaumarchaeota	Unassigned	Nitrososphaerales	Nitrososphaeraceae	Nitrososphaera	Unassigned
ASV_736	0	2	0	6	21	51	23	0	53	7	36	19	12	11	0	13	0	0	0	0	0	0	0	0	0	0	0	0	254		Bacteria	Acidobacteria	Acidobacteria_Gp6	Unassigned	Unassigned	Gp6	Unassigned
ASV_795	0	52	0	25	6	18	15	19	12	13	21	34	8	16	1	9	1	0	0	0	0	0	0	0	0	1	2	0	253		Bacteria	Planctomycetes	Planctomycetia	Planctomycetales	Planctomycetaceae	Unassigned	Unassigned
ASV_410	8	2	0	27	116	67	0	0	5	1	5	4	2	7	6	2	0	0	0	0	0	0	0	0	0	0	0	0	252		Bacteria	Proteobacteria	Betaproteobacteria	Burkholderiales	Comamonadaceae	Unassigned	Unassigned
ASV_583	10	0	0	19	20	151	3	0	1	4	7	0	3	30	4	0	0	0	0	0	0	0	0	0	0	0	0	0	252		Bacteria	Proteobacteria	Alphaproteobacteria	Sphingomonadales	Sphingomonadaceae	Unassigned	Unassigned
ASV_818	1	0	0	0	1	0	3	2	6	17	113	80	9	18	1	1	0	0	0	0	0	0	0	0	0	0	0	0	252		Bacteria	Candidatus_Saccharibacteria	Unassigned	Unassigned	Unassigned	Saccharibacteria_genera_incertae_sedis	Unassigned
ASV_416	27	2	0	41	24	57	0	0	1	30	16	3	7	32	8	3	0	0	0	0	0	0	0	0	0	0	0	0	251		Bacteria	Proteobacteria	Alphaproteobacteria	Sphingomonadales	Sphingomonadaceae	Sphingorhabdus	Sphingorhabdus_planktonica
ASV_520	0	0	1	1	1	0	4	0	2	0	3	9	1	7	0	4	16	26	138	0	0	7	0	0	0	0	3	28	251		Bacteria	Verrucomicrobia	Verrucomicrobiae	Verrucomicrobiales	Verrucomicrobiaceae	Unassigned	Unassigned
ASV_653	2	0	1	0	0	1	0	0	0	79	1	4	1	2	149	1	1	2	0	1	1	1	2	0	0	0	0	2	251		Bacteria	Firmicutes	Bacilli	Bacillales	Planococcaceae	Unassigned	Unassigned
ASV_490	0	0	102	0	0	0	0	0	2	75	0	1	34	4	2	20	4	0	0	0	0	0	1	5	0	0	0	0	250		Bacteria	Actinobacteria	Actinobacteria	Actinomycetales	Microbacteriaceae	Rhodoluna	Rhodoluna_lacicola
ASV_537	0	29	0	23	20	25	13	0	61	5	19	25	8	11	0	11	0	0	0	0	0	0	0	0	0	0	0	0	250		Bacteria	Acidobacteria	Acidobacteria_Gp6	Unassigned	Unassigned	Gp6	Unassigned
ASV_596	0	4	0	7	34	28	22	1	77	1	19	27	0	19	3	8	0	0	0	0	0	0	0	0	0	0	0	0	250		Bacteria	Acidobacteria	Acidobacteria_Gp6	Unassigned	Unassigned	Gp6	Unassigned
ASV_459	0	6	65	0	1	0	0	1	6	30	3	15	92	8	0	21	1	0	0	0	0	0	0	0	0	0	0	0	249		Bacteria	Bacteroidetes	Flavobacteriia	Flavobacteriales	Flavobacteriaceae	Flavobacterium	Unassigned
ASV_2769	0	0	1	0	0	0	0	0	0	2	0	0	0	0	0	0	2	100	19	14	7	4	12	14	20	27	20	7	249		Bacteria	Verrucomicrobia	Spartobacteria	Unassigned	Unassigned	Spartobacteria_genera_incertae_sedis	Unassigned
ASV_449	94	2	0	10	37	44	5	0	0	0	5	0	0	10	41	0	0	0	0	0	0	0	0	0	0	0	0	0	248		Bacteria	Proteobacteria	Alphaproteobacteria	Sphingomonadales	Sphingomonadaceae	Sphingorhabdus	Sphingorhabdus_planktonica
ASV_549	3	172	0	2	1	29	4	2	4	0	11	16	1	1	1	1	0	0	0	0	0	0	0	0	0	0	0	0	248		Bacteria	Parcubacteria	Unassigned	Unassigned	Unassigned	Parcubacteria_genera_incertae_sedis	Unassigned
ASV_450	0	0	0	0	0	0	0	0	0	0	0	0	0	0	0	0	1	21	13	4	2	7	3	3	37	153	2	1	247		Unassigned	Unassigned	Unassigned	Unassigned	Unassigned	Unassigned	Unassigned
ASV_493	0	0	0	21	10	29	1	1	28	20	46	25	9	18	6	32	1	0	0	0	0	0	0	0	0	0	0	0	247		Bacteria	Acidobacteria	Acidobacteria_Gp4	Unassigned	Unassigned	Aridibacter	Aridibacter_famidurans
ASV_484	1	17	0	51	16	27	17	0	9	8	48	20	10	18	0	3	0	0	0	0	0	0	0	0	0	0	0	0	245		Bacteria	Actinobacteria	Actinobacteria	Unassigned	Unassigned	Unassigned	Unassigned
ASV_463	1	4	2	0	0	95	0	0	1	73	0	4	3	3	30	0	1	1	3	5	3	0	1	0	2	0	0	12	244		Bacteria	Firmicutes	Bacilli	Bacillales	Planococcaceae	Planococcus	Planococcus_maitriensis
ASV_477	1	16	2	47	6	37	3	22	16	22	35	14	7	11	0	1	1	2	1	0	0	0	0	0	0	0	0	0	244		Bacteria	Candidatus_Saccharibacteria	Unassigned	Unassigned	Unassigned	Saccharibacteria_genera_incertae_sedis	Unassigned
ASV_475	15	29	0	27	23	35	1	0	4	2	10	3	5	46	41	3	0	0	0	0	0	0	0	0	0	0	0	0	244		Bacteria	Proteobacteria	Betaproteobacteria	Burkholderiales	Oxalobacteraceae	Massilia	Massilia_plicata
ASV_744	0	84	0	13	7	16	74	0	15	1	9	9	9	3	0	4	0	0	0	0	0	0	0	0	0	0	0	0	244		Bacteria	Acidobacteria	Acidobacteria_Gp6	Unassigned	Unassigned	Gp6	Unassigned
ASV_1181	5	32	0	42	17	70	9	0	10	0	18	15	7	13	6	0	0	0	0	0	0	0	0	0	0	0	0	0	244		Bacteria	Candidatus_Saccharibacteria	Unassigned	Unassigned	Unassigned	Saccharibacteria_genera_incertae_sedis	Unassigned
ASV_2803	0	0	0	1	11	0	6	26	32	38	29	58	20	20	0	3	0	0	0	0	0	0	0	0	0	0	0	0	244		Bacteria	Verrucomicrobia	Verrucomicrobiae	Verrucomicrobiales	Verrucomicrobiaceae	Prosthecobacter	Unassigned
ASV_419	0	0	0	0	0	0	0	0	0	0	0	0	0	0	0	0	1	7	15	2	1	20	3	0	31	159	3	1	243		Unassigned	Unassigned	Unassigned	Unassigned	Unassigned	Unassigned	Unassigned
ASV_446	0	0	0	0	0	0	2	0	0	0	1	0	0	0	0	0	0	7	1	1	41	0	5	24	8	30	5	118	243		Bacteria	Planctomycetes	Planctomycetia	Planctomycetales	Planctomycetaceae	Blastopirellula	Unassigned
ASV_447	0	0	0	123	15	13	7	0	13	0	37	20	1	3	1	10	0	0	0	0	0	0	0	0	0	0	0	0	243		Bacteria	Acidobacteria	Acidobacteria_Gp4	Unassigned	Unassigned	Aridibacter	Aridibacter_famidurans
ASV_539	115	12	0	12	0	12	1	1	0	1	8	1	0	16	62	0	0	0	0	0	0	0	0	0	0	0	0	0	241		Bacteria	Bacteroidetes	Cytophagia	Cytophagales	Cytophagaceae	Hymenobacter	Unassigned
ASV_432	0	0	0	0	0	0	0	0	0	0	0	1	2	0	1	17	2	0	5	5	19	15	19	21	22	18	27	66	240		Bacteria	Bacteroidetes	Cytophagia	Cytophagales	Cyclobacteriaceae	Algoriphagus	Unassigned
ASV_467	0	0	196	0	0	0	1	7	0	8	16	11	0	1	0	0	0	0	0	0	0	0	0	0	0	0	0	0	240		Bacteria	Parcubacteria	Unassigned	Unassigned	Unassigned	Parcubacteria_genera_incertae_sedis	Unassigned
ASV_542	0	0	0	0	0	4	4	6	0	0	6	4	4	2	0	0	0	0	1	0	0	0	0	0	0	0	209	0	240		Bacteria	Planctomycetes	Planctomycetia	Planctomycetales	Planctomycetaceae	Unassigned	Unassigned
ASV_794	0	8	0	18	22	17	7	32	18	14	36	28	12	7	0	20	1	0	0	0	0	0	0	0	0	0	0	0	240		Bacteria	Acidobacteria	Acidobacteria_Gp6	Unassigned	Unassigned	Gp6	Unassigned
ASV_458	0	0	0	0	0	0	0	0	0	0	0	0	0	0	0	0	7	9	1	19	38	18	0	13	8	7	3	116	239		Bacteria	Chloroflexi	Unassigned	Unassigned	Unassigned	Unassigned	Unassigned
ASV_511	0	5	0	42	80	38	2	0	8	0	24	13	4	8	15	0	0	0	0	0	0	0	0	0	0	0	0	0	239		Bacteria	Actinobacteria	Actinobacteria	Unassigned	Unassigned	Unassigned	Unassigned
ASV_453	0	159	0	0	1	61	0	0	1	0	2	4	6	1	1	2	0	0	0	0	0	0	0	0	0	0	0	0	238		Bacteria	Parcubacteria	Unassigned	Unassigned	Unassigned	Parcubacteria_genera_incertae_sedis	Unassigned
ASV_464	0	0	0	3	0	0	0	1	0	1	1	0	0	0	0	1	8	3	22	7	35	6	19	87	28	9	4	3	238		Bacteria	Bacteroidetes	Sphingobacteriia	Sphingobacteriales	Chitinophagaceae	Unassigned	Unassigned
ASV_481	0	0	0	0	0	201	1	0	0	32	1	0	0	0	0	0	0	0	1	1	0	0	0	0	0	0	0	0	237		Bacteria	Firmicutes	Bacilli	Bacillales	Planococcaceae	Unassigned	Unassigned
ASV_1437	1	0	0	27	17	10	25	7	31	4	25	23	18	17	3	26	3	0	0	0	0	0	0	0	0	0	0	0	237		Bacteria	Acidobacteria	Acidobacteria_Gp6	Unassigned	Unassigned	Gp6	Unassigned
ASV_489	0	0	0	0	0	0	0	0	0	0	0	0	1	0	0	0	6	1	14	21	33	5	36	66	22	4	11	15	235		Bacteria	Actinobacteria	Actinobacteria	Actinomycetales	Unassigned	Unassigned	Unassigned
ASV_4961	0	3	88	3	2	3	0	2	1	41	2	8	0	7	1	58	14	0	1	0	0	0	0	0	0	1	0	0	235		Bacteria	Proteobacteria	Alphaproteobacteria	Rhodobacterales	Rhodobacteraceae	Rhodobacter	Unassigned
ASV_5351	8	39	0	50	68	13	7	0	13	4	10	2	2	10	2	2	0	0	1	0	0	0	0	0	0	0	3	1	235		Bacteria	Bacteroidetes	Sphingobacteriia	Sphingobacteriales	Chitinophagaceae	Unassigned	Unassigned
ASV_461	43	0	0	24	2	7	0	0	0	90	2	5	11	30	18	2	0	0	0	0	0	0	0	0	0	0	0	0	234		Bacteria	Actinobacteria	Actinobacteria	Actinomycetales	Micrococcaceae	Arthrobacter	Unassigned
ASV_992	0	0	166	0	1	0	0	0	0	1	0	0	0	0	0	0	0	0	66	0	0	0	0	0	0	0	0	0	234		Bacteria	Candidatus_Saccharibacteria	Unassigned	Unassigned	Unassigned	Saccharibacteria_genera_incertae_sedis	Unassigned
ASV_448	7	0	0	70	55	27	6	0	2	12	21	4	2	23	3	1	0	0	0	0	0	0	0	0	0	0	0	0	233		Bacteria	Proteobacteria	Gammaproteobacteria	Xanthomonadales	Xanthomonadaceae	Lysobacter	Lysobacter_ginsengisoli
ASV_557	0	20	1	24	34	15	12	2	13	4	43	22	3	9	19	9	0	0	1	0	1	0	0	0	0	0	1	0	233		Bacteria	Planctomycetes	Planctomycetia	Planctomycetales	Planctomycetaceae	Unassigned	Unassigned
ASV_556	0	2	0	0	1	0	219	0	0	0	4	4	0	0	2	1	0	0	0	0	0	0	0	0	0	0	0	0	233		Bacteria	Firmicutes	Unassigned	Unassigned	Unassigned	Unassigned	Unassigned
ASV_916	0	6	0	15	39	19	27	0	35	6	23	26	4	11	5	12	0	0	0	0	0	4	0	0	0	0	1	0	233		Bacteria	Acidobacteria	Acidobacteria_Gp6	Unassigned	Unassigned	Gp6	Unassigned
ASV_480	0	0	0	0	0	0	0	198	3	10	7	10	1	2	0	1	0	0	0	0	0	0	0	0	0	0	0	0	232		Bacteria	Unassigned	Unassigned	Unassigned	Unassigned	Unassigned	Unassigned
ASV_1977	11	52	3	12	43	37	1	1	9	4	6	4	9	3	2	14	8	0	4	0	1	0	0	4	0	1	0	3	232		Bacteria	Proteobacteria	Betaproteobacteria	Burkholderiales	Unassigned	Unassigned	Unassigned
ASV_454	0	0	0	0	1	0	0	203	0	5	8	10	1	2	0	1	0	0	0	0	0	0	0	0	0	0	0	0	231		Bacteria	Unassigned	Unassigned	Unassigned	Unassigned	Unassigned	Unassigned
ASV_472	0	0	0	0	0	0	0	0	0	0	0	0	0	0	0	0	38	28	31	9	12	8	12	18	25	11	6	33	231		Bacteria	Chloroflexi	Unassigned	Unassigned	Unassigned	Unassigned	Unassigned
ASV_496	0	2	0	0	0	0	0	0	1	0	0	9	11	7	12	181	5	2	0	1	0	0	0	0	0	0	0	0	231		Bacteria	Verrucomicrobia	Verrucomicrobiae	Verrucomicrobiales	Verrucomicrobiaceae	Prosthecobacter	Prosthecobacter_algae
ASV_465	0	0	0	0	0	0	0	0	0	0	0	0	0	0	0	0	10	15	0	9	17	13	15	87	28	15	4	17	230		Bacteria	Actinobacteria	Actinobacteria	Actinomycetales	Microbacteriaceae	Pontimonas	Pontimonas_salivibrio
ASV_558	0	0	1	4	2	17	7	22	42	57	27	33	11	6	1	0	0	0	0	0	0	0	0	0	0	0	0	0	230		Bacteria	Candidatus_Saccharibacteria	Unassigned	Unassigned	Unassigned	Saccharibacteria_genera_incertae_sedis	Unassigned
ASV_619	0	0	2	6	0	6	3	1	57	16	19	42	30	16	1	13	17	1	0	0	0	0	0	0	0	0	0	0	230		Bacteria	Proteobacteria	Deltaproteobacteria	Unassigned	Unassigned	Unassigned	Unassigned
ASV_697	16	1	12	7	114	28	2	0	16	0	5	6	0	4	15	4	0	0	0	0	0	0	0	0	0	0	0	0	230		Bacteria	Proteobacteria	Betaproteobacteria	Burkholderiales	Comamonadaceae	Unassigned	Unassigned
ASV_1018	0	27	0	32	8	25	26	9	18	0	24	25	13	7	2	6	5	0	2	0	0	0	0	0	0	0	0	1	230		Bacteria	Acidobacteria	Acidobacteria_Gp6	Unassigned	Unassigned	Gp6	Unassigned
ASV_703	33	0	1	0	2	9	1	26	7	76	12	4	38	4	8	2	1	0	5	0	0	0	0	0	0	0	0	0	229		Bacteria	Parcubacteria	Unassigned	Unassigned	Unassigned	Parcubacteria_genera_incertae_sedis	Unassigned
ASV_800	0	0	0	13	10	30	89	0	14	4	28	20	6	10	3	1	0	1	0	0	0	0	0	0	0	0	0	0	229		Bacteria	Acidobacteria	Acidobacteria_Gp6	Unassigned	Unassigned	Gp6	Unassigned
ASV_629	0	0	0	11	15	20	35	2	32	7	14	29	19	20	0	20	2	2	0	0	0	0	0	0	0	0	0	0	228		Bacteria	Actinobacteria	Actinobacteria	Unassigned	Unassigned	Unassigned	Unassigned
ASV_428	0	199	1	0	0	10	3	0	4	0	0	3	4	2	0	1	0	0	0	0	0	0	0	0	0	0	0	0	227		Bacteria	Parcubacteria	Unassigned	Unassigned	Unassigned	Parcubacteria_genera_incertae_sedis	Unassigned
ASV_478	0	0	0	0	0	0	0	0	0	0	0	0	0	0	0	0	5	4	3	2	7	3	10	115	19	25	11	23	227		Bacteria	Actinobacteria	Actinobacteria	Actinomycetales	Unassigned	Unassigned	Unassigned
ASV_839	11	0	0	0	1	0	0	1	0	0	1	0	0	3	166	3	10	1	0	1	2	0	0	22	0	0	5	0	227		Bacteria	Proteobacteria	Alphaproteobacteria	Sphingomonadales	Sphingomonadaceae	Sphingomonas	Unassigned
ASV_451	0	0	0	0	0	0	0	1	0	0	0	2	0	0	1	1	0	0	0	0	0	221	0	0	0	0	0	0	226		Bacteria	Unassigned	Unassigned	Unassigned	Unassigned	Unassigned	Unassigned
ASV_471	0	0	0	0	0	0	1	223	0	0	1	0	0	0	1	0	0	0	0	0	0	0	0	0	0	0	0	0	226		Bacteria	Unassigned	Unassigned	Unassigned	Unassigned	Unassigned	Unassigned
ASV_495	0	0	0	0	0	0	0	0	0	3	0	0	0	0	0	1	11	0	6	10	37	11	11	23	4	5	7	97	226		Bacteria	Proteobacteria	Alphaproteobacteria	Caulobacterales	Hyphomonadaceae	Hyphomonas	Hyphomonas_polymorpha
ASV_594	0	0	0	0	0	0	0	0	0	1	0	0	0	0	0	0	5	6	4	5	22	9	13	82	29	21	12	17	226		Bacteria	Actinobacteria	Actinobacteria	Actinomycetales	Microbacteriaceae	Pontimonas	Pontimonas_salivibrio
ASV_1201	0	0	0	9	8	8	11	12	49	11	17	40	19	12	0	25	4	0	1	0	0	0	0	0	0	0	0	0	226		Bacteria	Acidobacteria	Acidobacteria_Gp6	Unassigned	Unassigned	Gp6	Unassigned
ASV_2919	0	0	0	16	12	37	25	13	48	3	16	23	9	13	0	11	0	0	0	0	0	0	0	0	0	0	0	0	226		Bacteria	Acidobacteria	Acidobacteria_Gp6	Unassigned	Unassigned	Gp6	Unassigned
ASV_501	8	12	0	32	122	11	0	0	0	6	13	2	10	3	1	5	0	0	0	0	0	0	0	0	0	0	0	0	225		Bacteria	Proteobacteria	Betaproteobacteria	Burkholderiales	Comamonadaceae	Unassigned	Unassigned
ASV_3711	30	22	1	4	4	22	2	43	0	76	2	1	8	5	2	2	0	0	0	0	0	0	0	0	1	0	0	0	225		Bacteria	Proteobacteria	Gammaproteobacteria	Pseudomonadales	Pseudomonadaceae	Pseudomonas	Pseudomonas_abietaniphila
ASV_779	0	0	3	0	1	4	0	3	5	6	0	5	2	3	0	2	5	77	26	27	2	5	12	0	5	8	12	11	224		Bacteria	Verrucomicrobia	Spartobacteria	Unassigned	Unassigned	Spartobacteria_genera_incertae_sedis	Unassigned
ASV_4182	35	0	13	9	18	7	0	0	12	35	1	7	67	2	0	18	0	0	0	0	0	0	0	0	0	0	0	0	224		Bacteria	Proteobacteria	Betaproteobacteria	Burkholderiales	Comamonadaceae	Unassigned	Unassigned
ASV_768	0	0	0	45	16	6	5	6	29	17	29	27	10	15	0	18	0	0	0	0	0	0	0	0	0	0	0	0	223		Bacteria	Acidobacteria	Acidobacteria_Gp6	Unassigned	Unassigned	Gp6	Unassigned
ASV_506	0	0	0	0	0	0	2	177	7	11	5	14	2	1	1	1	0	0	0	0	0	1	0	0	0	0	0	0	222		Bacteria	Unassigned	Unassigned	Unassigned	Unassigned	Unassigned	Unassigned
ASV_518	12	2	0	6	136	26	2	0	17	2	4	4	1	3	5	1	0	0	0	0	0	0	0	0	0	0	0	0	221		Bacteria	Proteobacteria	Betaproteobacteria	Burkholderiales	Comamonadaceae	Variovorax	Variovorax_guangxiensis
ASV_555	0	0	0	3	2	0	0	2	6	2	3	6	1	1	114	76	4	0	1	0	0	0	0	0	0	0	0	0	221		Bacteria	Planctomycetes	Planctomycetia	Planctomycetales	Planctomycetaceae	Unassigned	Unassigned
ASV_532	0	0	0	0	0	0	0	0	0	0	0	0	0	0	0	0	6	43	49	34	13	23	9	0	4	0	20	19	220		Bacteria	Planctomycetes	Planctomycetia	Planctomycetales	Planctomycetaceae	Planctopirus	Planctopirus_limnophila
ASV_573	119	10	0	19	2	15	0	3	0	4	10	0	0	29	9	0	0	0	0	0	0	0	0	0	0	0	0	0	220		Bacteria	Bacteroidetes	Cytophagia	Cytophagales	Cytophagaceae	Hymenobacter	Hymenobacter_glaciei
ASV_925	0	3	0	22	58	8	14	1	22	1	28	16	4	23	7	12	1	0	0	0	0	0	0	0	0	0	0	0	220		Bacteria	Acidobacteria	Acidobacteria_Gp6	Unassigned	Unassigned	Gp6	Unassigned
ASV_1052	2	10	0	3	21	6	113	0	32	0	7	14	1	6	0	5	0	0	0	0	0	0	0	0	0	0	0	0	220		Bacteria	Acidobacteria	Acidobacteria_Gp6	Unassigned	Unassigned	Gp6	Unassigned
ASV_606	1	0	0	13	47	8	2	33	14	4	38	35	5	10	6	3	0	0	0	0	0	0	0	0	0	0	0	0	219		Bacteria	Verrucomicrobia	Verrucomicrobiae	Verrucomicrobiales	Verrucomicrobiaceae	Unassigned	Unassigned
ASV_3392	0	14	0	17	9	1	10	2	22	26	50	37	13	12	1	4	1	0	0	0	0	0	0	0	0	0	0	0	219		Bacteria	Verrucomicrobia	Spartobacteria	Unassigned	Unassigned	Spartobacteria_genera_incertae_sedis	Unassigned
ASV_529	0	0	0	0	0	0	0	0	17	88	48	44	16	5	0	0	0	0	0	0	0	0	0	0	0	0	0	0	218		Bacteria	Candidatus_Saccharibacteria	Unassigned	Unassigned	Unassigned	Saccharibacteria_genera_incertae_sedis	Unassigned
ASV_684	0	25	0	6	6	7	1	4	10	45	34	46	10	11	5	4	2	0	1	0	0	0	0	0	0	0	0	0	217		Bacteria	Planctomycetes	Planctomycetia	Planctomycetales	Planctomycetaceae	Pirellula	Pirellula_staleyi
ASV_785	0	0	2	11	3	4	11	60	13	27	28	30	9	13	3	0	0	3	0	0	0	0	0	0	0	0	0	0	217		Bacteria	Candidatus_Saccharibacteria	Unassigned	Unassigned	Unassigned	Saccharibacteria_genera_incertae_sedis	Unassigned
ASV_540	0	0	0	0	0	0	0	0	0	0	0	0	0	0	0	0	30	69	33	7	3	8	9	7	9	9	13	19	216		Bacteria	Verrucomicrobia	Unassigned	Unassigned	Unassigned	Unassigned	Unassigned
ASV_602	2	12	4	18	20	42	5	5	14	9	28	22	4	13	7	5	1	2	2	0	0	0	0	0	0	0	1	0	216		Bacteria	Planctomycetes	Planctomycetia	Planctomycetales	Planctomycetaceae	Unassigned	Unassigned
ASV_617	0	7	0	22	46	76	3	0	8	2	15	22	0	9	3	3	0	0	0	0	0	0	0	0	0	0	0	0	216		Bacteria	Actinobacteria	Actinobacteria	Unassigned	Unassigned	Unassigned	Unassigned
ASV_628	1	19	0	3	2	21	25	0	14	0	38	44	20	20	1	8	0	0	0	0	0	0	0	0	0	0	0	0	216		Bacteria	Actinobacteria	Actinobacteria	Unassigned	Unassigned	Unassigned	Unassigned
ASV_457	0	0	0	0	0	0	0	0	0	0	0	0	0	0	0	0	1	5	75	1	11	0	7	43	20	7	15	30	215		Bacteria	Unassigned	Unassigned	Unassigned	Unassigned	Unassigned	Unassigned
ASV_669	25	1	0	12	1	12	0	8	1	113	1	3	11	21	3	0	0	1	0	0	0	0	0	0	1	0	1	0	215		Bacteria	Actinobacteria	Actinobacteria	Actinomycetales	Nocardiaceae	Rhodococcus	Rhodococcus_cerastii
ASV_1138	0	4	0	11	10	23	33	0	41	6	22	22	13	18	0	10	0	2	0	0	0	0	0	0	0	0	0	0	215		Bacteria	Acidobacteria	Acidobacteria_Gp6	Unassigned	Unassigned	Gp6	Unassigned
ASV_1438	0	0	186	0	0	0	0	0	0	4	0	0	3	1	0	1	0	0	0	0	0	2	0	15	2	1	0	0	215		Bacteria	Actinobacteria	Actinobacteria	Actinomycetales	Microbacteriaceae	Rhodoluna	Rhodoluna_lacicola
ASV_543	58	0	2	17	30	9	4	1	2	5	16	2	1	21	43	3	0	0	0	0	0	0	0	0	0	0	0	0	214		Bacteria	Proteobacteria	Alphaproteobacteria	Sphingomonadales	Sphingomonadaceae	Sphingorhabdus	Sphingorhabdus_planktonica
ASV_572	0	0	0	18	11	18	56	0	25	0	34	22	10	17	1	2	0	0	0	0	0	0	0	0	0	0	0	0	214		Bacteria	Acidobacteria	Acidobacteria_Gp4	Unassigned	Unassigned	Gp4	Unassigned
ASV_584	98	1	0	6	19	24	6	0	0	0	4	0	0	15	41	0	0	0	0	0	0	0	0	0	0	0	0	0	214		Bacteria	Proteobacteria	Alphaproteobacteria	Sphingomonadales	Sphingomonadaceae	Unassigned	Unassigned
ASV_603	1	0	0	88	24	30	4	1	20	5	6	14	2	14	2	0	0	0	0	0	0	2	0	0	0	0	1	0	214		Bacteria	Candidatus_Saccharibacteria	Unassigned	Unassigned	Unassigned	Saccharibacteria_genera_incertae_sedis	Unassigned
ASV_771	1	0	0	35	22	14	7	0	23	1	54	33	17	5	0	2	0	0	0	0	0	0	0	0	0	0	0	0	214		Bacteria	Verrucomicrobia	Spartobacteria	Unassigned	Unassigned	Spartobacteria_genera_incertae_sedis	Unassigned
ASV_1332	0	3	0	22	8	15	83	6	18	1	20	15	5	6	0	12	0	0	0	0	0	0	0	0	0	0	0	0	214		Bacteria	Acidobacteria	Acidobacteria_Gp6	Unassigned	Unassigned	Gp6	Unassigned
ASV_601	1	0	2	0	0	0	0	0	0	1	0	0	13	0	32	0	41	2	61	1	0	2	0	3	1	0	53	0	213		Bacteria	Proteobacteria	Alphaproteobacteria	Caulobacterales	Caulobacteraceae	Brevundimonas	Unassigned
ASV_704	2	0	0	37	5	4	10	76	5	6	33	18	8	7	1	1	0	0	0	0	0	0	0	0	0	0	0	0	213		Bacteria	Planctomycetes	Planctomycetia	Planctomycetales	Planctomycetaceae	Unassigned	Unassigned
ASV_525	0	7	0	6	18	10	11	0	38	8	36	45	11	14	0	8	0	0	0	0	0	0	0	0	0	0	0	0	212		Bacteria	Acidobacteria	Acidobacteria_Gp6	Unassigned	Unassigned	Gp6	Unassigned
ASV_571	3	1	0	2	0	2	0	0	0	1	0	0	3	1	0	0	73	1	12	7	26	16	6	15	4	1	16	22	212		Bacteria	Proteobacteria	Alphaproteobacteria	Caulobacterales	Caulobacteraceae	Phenylobacterium	Unassigned
ASV_578	0	0	0	0	0	0	0	0	0	0	0	0	0	0	0	0	0	0	39	0	1	0	0	0	1	0	18	153	212		Bacteria	Verrucomicrobia	Verrucomicrobiae	Verrucomicrobiales	Verrucomicrobiaceae	Luteolibacter	Unassigned
ASV_526	0	0	0	1	1	0	0	0	1	1	1	4	0	0	0	2	0	0	183	0	0	0	0	0	0	0	17	0	211		Bacteria	Planctomycetes	Planctomycetia	Planctomycetales	Planctomycetaceae	Unassigned	Unassigned
ASV_576	72	15	0	2	2	7	0	5	0	70	5	1	8	9	10	5	0	0	0	0	0	0	0	0	0	0	0	0	211		Bacteria	Actinobacteria	Actinobacteria	Actinomycetales	Micrococcaceae	Arthrobacter	Arthrobacter_agilis
ASV_705	1	0	1	19	6	35	5	16	4	12	23	32	12	23	1	20	0	0	0	0	0	1	0	0	0	0	0	0	211		Bacteria	Verrucomicrobia	Unassigned	Unassigned	Unassigned	Unassigned	Unassigned
ASV_883	0	39	0	11	9	30	38	8	10	1	23	20	5	13	1	3	0	0	0	0	0	0	0	0	0	0	0	0	211		Bacteria	Actinobacteria	Actinobacteria	Unassigned	Unassigned	Unassigned	Unassigned
ASV_514	50	18	0	19	7	10	0	0	1	3	33	3	1	45	20	0	0	0	0	0	0	0	0	0	0	0	0	0	210		Bacteria	Bacteroidetes	Cytophagia	Cytophagales	Cytophagaceae	Hymenobacter	Unassigned
ASV_535	3	5	0	37	63	25	1	1	18	11	11	6	14	9	1	2	3	0	0	0	0	0	0	0	0	0	0	0	210		Bacteria	Proteobacteria	Gammaproteobacteria	Xanthomonadales	Xanthomonadaceae	Arenimonas	Unassigned
ASV_894	3	1	28	10	7	11	1	0	5	66	5	4	20	5	2	37	1	0	1	0	1	1	0	1	0	0	0	0	210		Bacteria	Proteobacteria	Alphaproteobacteria	Rhodobacterales	Rhodobacteraceae	Unassigned	Unassigned
ASV_531	0	0	0	0	0	0	0	0	1	1	0	3	5	2	0	196	1	0	0	0	0	0	0	0	0	0	0	0	209		Bacteria	Bacteroidetes	Unassigned	Unassigned	Unassigned	Unassigned	Unassigned
ASV_674	0	0	5	3	42	19	5	17	6	3	44	36	1	11	12	1	2	1	0	0	0	1	0	0	0	0	0	0	209		Bacteria	Candidatus_Saccharibacteria	Unassigned	Unassigned	Unassigned	Saccharibacteria_genera_incertae_sedis	Unassigned
ASV_690	19	2	0	0	2	35	0	6	0	34	1	1	0	1	59	0	0	0	0	44	4	1	0	0	0	0	0	0	209		Bacteria	Firmicutes	Bacilli	Bacillales	Unassigned	Unassigned	Unassigned
ASV_825	0	7	0	12	49	16	17	3	33	1	30	12	5	9	4	11	0	0	0	0	0	0	0	0	0	0	0	0	209		Bacteria	Acidobacteria	Acidobacteria_Gp6	Unassigned	Unassigned	Gp6	Unassigned
ASV_502	0	0	0	0	0	0	0	0	0	0	0	0	0	0	0	0	3	3	57	3	10	1	12	63	15	6	18	16	207		Bacteria	Unassigned	Unassigned	Unassigned	Unassigned	Unassigned	Unassigned
ASV_3161	8	2	0	22	47	16	9	0	18	19	20	4	5	14	2	21	0	0	0	0	0	0	0	0	0	0	0	0	207		Bacteria	Bacteroidetes	Sphingobacteriia	Sphingobacteriales	Chitinophagaceae	Terrimonas	Terrimonas_aquatica
ASV_3359	1	0	0	41	8	11	25	4	22	3	34	30	2	13	9	3	0	0	1	0	0	0	0	0	0	0	0	0	207		Bacteria	Planctomycetes	Planctomycetia	Planctomycetales	Planctomycetaceae	Singulisphaera	Singulisphaera_rosea
ASV_5728	0	0	0	15	24	13	28	8	38	3	38	20	3	5	8	3	0	0	0	0	0	0	0	0	1	0	0	0	207		Bacteria	Verrucomicrobia	Spartobacteria	Unassigned	Unassigned	Spartobacteria_genera_incertae_sedis	Unassigned
ASV_546	1	3	0	17	35	36	26	0	36	0	13	19	4	11	5	0	0	0	0	0	0	0	0	0	0	0	0	0	206		Bacteria	Acidobacteria	Acidobacteria_Gp4	Unassigned	Unassigned	Gp4	Unassigned
ASV_642	175	14	0	2	1	1	2	4	1	2	0	1	0	1	2	0	0	0	0	0	0	0	0	0	0	0	0	0	206		Bacteria	Proteobacteria	Alphaproteobacteria	Sphingomonadales	Sphingomonadaceae	Sphingomonas	Unassigned
ASV_2411	0	0	0	26	51	2	4	0	21	1	28	13	3	14	32	11	0	0	0	0	0	0	0	0	0	0	0	0	206		Bacteria	Verrucomicrobia	Verrucomicrobiae	Verrucomicrobiales	Verrucomicrobiaceae	Luteolibacter	Luteolibacter_yonseiensis
ASV_504	0	0	0	0	0	0	0	0	0	0	0	0	0	0	0	0	16	5	8	16	26	16	6	12	5	11	4	80	205		Bacteria	Unassigned	Unassigned	Unassigned	Unassigned	Unassigned	Unassigned
ASV_527	0	15	0	84	19	7	4	0	8	3	31	13	5	6	3	7	0	0	0	0	0	0	0	0	0	0	0	0	205		Bacteria	Acidobacteria	Acidobacteria_Gp4	Unassigned	Unassigned	Aridibacter	Aridibacter_famidurans
ASV_600	0	0	0	2	0	0	2	110	5	2	12	8	2	10	0	1	36	3	4	3	1	0	3	0	0	0	0	1	205		Bacteria	Actinobacteria	Actinobacteria	Unassigned	Unassigned	Unassigned	Unassigned
ASV_1403	0	1	0	8	33	20	27	0	47	1	22	23	3	14	2	4	0	0	0	0	0	0	0	0	0	0	0	0	205		Bacteria	Acidobacteria	Acidobacteria_Gp6	Unassigned	Unassigned	Gp6	Unassigned
ASV_554	1	9	1	2	3	0	5	23	2	36	21	0	37	13	4	10	3	0	31	0	0	0	0	2	0	1	0	0	204		Bacteria	Verrucomicrobia	Verrucomicrobiae	Verrucomicrobiales	Verrucomicrobiaceae	Luteolibacter	Luteolibacter_cuticulihirudinis
ASV_838	1	0	0	7	12	10	1	3	31	3	38	33	7	32	8	4	13	0	1	0	0	0	0	0	0	0	0	0	204		Bacteria	Actinobacteria	Actinobacteria	Unassigned	Unassigned	Unassigned	Unassigned
ASV_3038	0	0	16	7	1	3	0	63	35	13	20	24	7	5	4	5	0	0	0	1	0	0	0	0	0	0	0	0	204		Bacteria	Firmicutes	Unassigned	Unassigned	Unassigned	Unassigned	Unassigned
ASV_4064	0	0	0	18	4	1	1	27	13	0	24	11	1	7	4	3	52	23	14	1	0	0	0	0	0	0	0	0	204		Bacteria	Verrucomicrobia	Verrucomicrobiae	Verrucomicrobiales	Verrucomicrobiaceae	Unassigned	Unassigned
ASV_551	16	42	0	13	13	43	1	0	2	7	15	0	2	27	21	1	0	0	0	0	0	0	0	0	0	0	0	0	203		Bacteria	Proteobacteria	Betaproteobacteria	Burkholderiales	Oxalobacteraceae	Massilia	Unassigned
ASV_641	0	28	0	7	0	2	1	96	9	2	19	18	3	14	1	3	0	0	0	0	0	0	0	0	0	0	0	0	203		Bacteria	Actinobacteria	Actinobacteria	Unassigned	Unassigned	Unassigned	Unassigned
ASV_4243	35	0	0	63	74	6	1	0	0	0	12	1	4	5	2	0	0	0	0	0	0	0	0	0	0	0	0	0	203		Bacteria	Bacteroidetes	Sphingobacteriia	Sphingobacteriales	Chitinophagaceae	Ferruginibacter	Ferruginibacter_yonginensis
ASV_569	8	50	0	14	7	34	2	7	3	10	33	25	3	4	1	0	0	1	0	0	0	0	0	0	0	0	0	0	202		Bacteria	Candidatus_Saccharibacteria	Unassigned	Unassigned	Unassigned	Saccharibacteria_genera_incertae_sedis	Unassigned
ASV_622	0	0	0	5	71	76	4	0	3	5	2	2	25	1	0	4	0	0	0	0	0	2	0	2	0	0	0	0	202		Bacteria	Proteobacteria	Betaproteobacteria	Burkholderiales	Comamonadaceae	Unassigned	Unassigned
ASV_1092	0	6	0	5	17	29	23	2	44	7	16	23	4	10	1	13	1	0	0	0	0	0	0	0	0	1	0	0	202		Bacteria	Acidobacteria	Acidobacteria_Gp6	Unassigned	Unassigned	Gp6	Unassigned
ASV_1260	1	1	0	16	2	23	59	0	16	1	30	25	8	16	1	3	0	0	0	0	0	0	0	0	0	0	0	0	202		Bacteria	Actinobacteria	Actinobacteria	Unassigned	Unassigned	Unassigned	Unassigned
ASV_568	1	0	0	1	0	0	0	12	10	1	8	12	7	13	0	2	106	2	16	6	0	0	1	1	0	0	0	2	201		Bacteria	Actinobacteria	Actinobacteria	Unassigned	Unassigned	Unassigned	Unassigned
ASV_581	0	0	0	6	3	2	0	1	18	50	36	37	12	14	4	12	2	1	1	0	1	1	0	0	0	0	0	0	201		Bacteria	Planctomycetes	Planctomycetia	Planctomycetales	Planctomycetaceae	Unassigned	Unassigned
ASV_615	0	0	0	103	21	45	3	0	3	0	14	9	0	2	0	1	0	0	0	0	0	0	0	0	0	0	0	0	201		Bacteria	Acidobacteria	Acidobacteria_Gp4	Unassigned	Unassigned	Aridibacter	Aridibacter_famidurans
ASV_851	70	87	2	0	0	8	1	1	1	6	3	4	15	1	1	1	0	0	0	0	0	0	0	0	0	0	0	0	201		Bacteria	Parcubacteria	Unassigned	Unassigned	Unassigned	Parcubacteria_genera_incertae_sedis	Unassigned
ASV_782	2	15	0	21	33	14	32	0	18	0	20	17	4	17	6	1	0	0	0	0	0	0	0	0	0	0	0	0	200		Bacteria	Unassigned	Unassigned	Unassigned	Unassigned	Unassigned	Unassigned
ASV_826	0	0	0	15	5	11	6	9	13	32	46	21	9	19	2	10	1	1	0	0	0	0	0	0	0	0	0	0	200		Bacteria	Planctomycetes	Planctomycetia	Planctomycetales	Planctomycetaceae	Pirellula	Pirellula_staleyi
ASV_565	0	0	0	0	0	2	0	18	3	1	5	12	1	8	0	0	140	0	9	0	0	0	0	0	0	0	0	0	199		Bacteria	Chloroflexi	Unassigned	Unassigned	Unassigned	Unassigned	Unassigned
ASV_2191	0	0	0	1	1	0	0	1	1	0	0	0	0	0	0	0	3	39	31	3	7	5	5	9	16	31	15	31	199		Bacteria	Verrucomicrobia	Spartobacteria	Unassigned	Unassigned	Unassigned	Unassigned
ASV_5435	0	4	0	51	20	40	10	0	11	1	17	10	4	10	7	4	0	1	6	0	0	0	1	0	0	0	2	0	199		Bacteria	Acidobacteria	Acidobacteria_Gp4	Unassigned	Unassigned	Aridibacter	Aridibacter_famidurans
ASV_560	9	2	19	24	8	18	0	0	3	4	5	1	9	59	35	2	0	0	0	0	0	0	0	0	0	0	0	0	198		Bacteria	Bacteroidetes	Flavobacteriia	Flavobacteriales	Flavobacteriaceae	Flavobacterium	Unassigned
ASV_730	27	1	0	65	16	52	2	0	2	4	12	4	3	9	1	0	0	0	0	0	0	0	0	0	0	0	0	0	198		Bacteria	Proteobacteria	Alphaproteobacteria	Sphingomonadales	Sphingomonadaceae	Parablastomonas	Parablastomonas_arctica
ASV_755	0	33	0	15	7	10	35	0	22	3	30	17	8	5	7	3	2	1	0	0	0	0	0	0	0	0	0	0	198		Bacteria	Unassigned	Unassigned	Unassigned	Unassigned	Unassigned	Unassigned
ASV_932	0	0	0	27	10	2	9	0	25	7	28	30	17	23	1	18	0	1	0	0	0	0	0	0	0	0	0	0	198		Bacteria	Acidobacteria	Acidobacteria_Gp6	Unassigned	Unassigned	Gp6	Unassigned
ASV_516	0	0	1	0	0	0	0	181	0	2	3	5	0	3	0	0	0	1	0	0	0	0	0	0	0	0	0	0	196		Bacteria	Unassigned	Unassigned	Unassigned	Unassigned	Unassigned	Unassigned
ASV_553	2	134	2	0	2	12	0	0	0	2	0	0	3	0	0	8	2	0	1	0	10	0	1	1	2	1	1	12	196		Bacteria	Proteobacteria	Betaproteobacteria	Burkholderiales	Burkholderiaceae	Limnobacter	Limnobacter_thiooxidans
ASV_595	0	0	0	5	3	3	3	37	18	3	36	34	8	27	9	6	4	0	0	0	0	0	0	0	0	0	0	0	196		Bacteria	Actinobacteria	Actinobacteria	Unassigned	Unassigned	Unassigned	Unassigned
ASV_702	1	30	0	25	32	32	1	0	11	13	9	1	11	4	0	12	6	1	2	1	0	0	0	2	0	0	1	1	196		Bacteria	Proteobacteria	Betaproteobacteria	Burkholderiales	Burkholderiales_incertae_sedis	Aquabacterium	Unassigned
ASV_912	0	0	138	0	0	0	0	0	0	0	0	3	0	0	0	0	0	0	54	0	0	0	0	0	0	0	1	0	196		Bacteria	Candidatus_Saccharibacteria	Unassigned	Unassigned	Unassigned	Saccharibacteria_genera_incertae_sedis	Unassigned
ASV_3549	48	0	0	5	19	68	3	0	0	1	4	0	1	16	29	1	0	0	0	0	0	0	0	0	0	1	0	0	196		Bacteria	Proteobacteria	Alphaproteobacteria	Sphingomonadales	Sphingomonadaceae	Unassigned	Unassigned
ASV_561	24	0	4	4	1	4	0	5	0	102	3	0	8	21	16	2	0	1	0	0	0	0	0	0	0	0	0	0	195		Bacteria	Actinobacteria	Actinobacteria	Actinomycetales	Micrococcaceae	Arthrobacter	Unassigned
ASV_652	142	13	0	0	1	0	0	6	2	5	0	3	0	8	14	0	0	0	0	0	0	0	0	1	0	0	0	0	195		Bacteria	Proteobacteria	Alphaproteobacteria	Sphingomonadales	Sphingomonadaceae	Sphingomonas	Unassigned
ASV_1002	0	4	0	6	10	19	62	0	22	4	16	17	9	15	1	10	0	0	0	0	0	0	0	0	0	0	0	0	195		Bacteria	Latescibacteria	Unassigned	Unassigned	Unassigned	Latescibacteria_genera_incertae_sedis	Unassigned
ASV_639	0	0	5	0	0	0	0	0	3	8	0	4	27	3	0	122	11	0	4	1	1	0	1	1	0	1	0	2	194		Bacteria	Bacteroidetes	Sphingobacteriia	Sphingobacteriales	Chitinophagaceae	Unassigned	Unassigned
ASV_1413	0	15	0	13	43	14	6	1	33	1	18	20	5	16	4	5	0	0	0	0	0	0	0	0	0	0	0	0	194		Bacteria	Acidobacteria	Acidobacteria_Gp6	Unassigned	Unassigned	Gp6	Unassigned
ASV_3350	0	30	1	7	1	8	1	94	4	8	18	15	3	2	0	0	0	2	0	0	0	0	0	0	0	0	0	0	194		Bacteria	Candidatus_Saccharibacteria	Unassigned	Unassigned	Unassigned	Saccharibacteria_genera_incertae_sedis	Unassigned
ASV_3990	0	0	152	0	0	0	0	0	3	4	0	0	29	0	0	6	0	0	0	0	0	0	0	0	0	0	0	0	194		Bacteria	Proteobacteria	Betaproteobacteria	Burkholderiales	Comamonadaceae	Limnohabitans	Unassigned
ASV_545	0	0	0	0	0	0	0	0	0	0	0	0	0	0	0	14	0	1	7	2	15	17	21	28	13	23	15	37	193		Bacteria	Bacteroidetes	Cytophagia	Cytophagales	Cyclobacteriaceae	Algoriphagus	Algoriphagus_aquatilis
ASV_613	4	1	2	4	0	4	0	0	0	15	5	1	1	43	8	1	0	0	0	4	5	4	4	1	39	23	24	0	193		Bacteria	Proteobacteria	Alphaproteobacteria	Caulobacterales	Caulobacteraceae	Brevundimonas	Unassigned
ASV_631	0	27	0	28	8	12	11	13	13	9	18	28	4	11	5	2	1	1	2	0	0	0	0	0	0	0	0	0	193		Bacteria	Unassigned	Unassigned	Unassigned	Unassigned	Unassigned	Unassigned
ASV_715	57	5	2	17	2	2	2	4	0	44	2	0	5	26	23	2	0	0	0	0	0	0	0	0	0	0	0	0	193		Bacteria	Actinobacteria	Actinobacteria	Actinomycetales	Micrococcaceae	Arthrobacter	Arthrobacter_siccitolerans
ASV_1706	0	9	0	18	28	45	9	2	9	2	27	25	3	3	9	4	0	0	0	0	0	0	0	0	0	0	0	0	193		Bacteria	Unassigned	Unassigned	Unassigned	Unassigned	Unassigned	Unassigned
ASV_2150	0	0	0	40	12	8	24	6	19	7	26	25	4	9	7	5	1	0	0	0	0	0	0	0	0	0	0	0	193		Bacteria	candidate_division_WPS-1	Unassigned	Unassigned	Unassigned	WPS-1_genera_incertae_sedis	Unassigned
ASV_611	58	23	0	4	2	5	1	36	2	19	14	6	2	18	2	0	0	0	0	0	0	0	0	0	0	0	0	0	192		Bacteria	Proteobacteria	Alphaproteobacteria	Sphingomonadales	Sphingomonadaceae	Sphingomonas	Sphingomonas_fennica
ASV_708	18	2	0	7	0	1	0	0	2	104	4	2	9	16	19	7	0	0	1	0	0	0	0	0	0	0	0	0	192		Bacteria	Actinobacteria	Actinobacteria	Actinomycetales	Microbacteriaceae	Unassigned	Unassigned
ASV_791	46	1	2	47	18	49	0	0	2	3	8	2	1	9	4	0	0	0	0	0	0	0	0	0	0	0	0	0	192		Bacteria	Proteobacteria	Alphaproteobacteria	Sphingomonadales	Sphingomonadaceae	Sphingomonas	Sphingomonas_kyeonggiensis
ASV_1441	2	0	1	4	4	31	2	66	10	7	25	29	5	6	0	0	0	0	0	0	0	0	0	0	0	0	0	0	192		Bacteria	Candidatus_Saccharibacteria	Unassigned	Unassigned	Unassigned	Saccharibacteria_genera_incertae_sedis	Unassigned
ASV_1557	2	0	0	12	0	6	5	103	4	8	30	14	2	6	0	0	0	0	0	0	0	0	0	0	0	0	0	0	192		Bacteria	Candidatus_Saccharibacteria	Unassigned	Unassigned	Unassigned	Saccharibacteria_genera_incertae_sedis	Unassigned
ASV_552	0	0	0	0	0	0	0	182	0	1	2	1	0	0	4	0	0	1	0	0	0	0	0	0	0	0	0	0	191		Bacteria	Unassigned	Unassigned	Unassigned	Unassigned	Unassigned	Unassigned
ASV_644	0	0	0	2	1	0	0	3	26	46	38	41	20	11	0	0	0	2	1	0	0	0	0	0	0	0	0	0	191		Bacteria	Candidatus_Saccharibacteria	Unassigned	Unassigned	Unassigned	Saccharibacteria_genera_incertae_sedis	Unassigned
ASV_1012	0	3	59	1	1	1	1	0	3	12	0	1	19	0	0	80	0	0	0	0	1	0	0	6	0	0	3	0	191		Bacteria	Proteobacteria	Betaproteobacteria	Burkholderiales	Comamonadaceae	Unassigned	Unassigned
ASV_1100	57	36	40	5	1	3	0	9	3	10	4	2	3	15	2	0	1	0	0	0	0	0	0	0	0	0	0	0	191		Bacteria	Proteobacteria	Alphaproteobacteria	Sphingomonadales	Sphingomonadaceae	Sphingomonas	Sphingomonas_abaci
ASV_2711	0	15	0	15	19	16	45	2	21	0	22	10	8	4	1	13	0	0	0	0	0	0	0	0	0	0	0	0	191		Bacteria	Acidobacteria	Acidobacteria_Gp6	Unassigned	Unassigned	Gp6	Unassigned
ASV_562	0	0	0	0	0	0	0	0	0	0	3	0	0	3	184	0	0	0	0	0	0	0	0	0	0	0	0	0	190		Bacteria	Bacteroidetes	Cytophagia	Cytophagales	Cytophagaceae	Hymenobacter	Hymenobacter_rigui
ASV_638	0	0	0	0	0	1	0	0	0	132	20	28	3	3	2	1	0	0	0	0	0	0	0	0	0	0	0	0	190		Bacteria	Candidatus_Saccharibacteria	Unassigned	Unassigned	Unassigned	Saccharibacteria_genera_incertae_sedis	Unassigned
ASV_627	0	0	0	0	0	0	0	0	1	11	0	1	0	0	20	2	0	0	2	137	11	0	1	0	0	0	4	0	190		Bacteria	Firmicutes	Bacilli	Bacillales	Planococcaceae	Unassigned	Unassigned
ASV_743	0	0	0	6	0	2	3	0	15	9	34	44	26	48	0	1	2	0	0	0	0	0	0	0	0	0	0	0	190		Bacteria	Actinobacteria	Actinobacteria	Unassigned	Unassigned	Unassigned	Unassigned
ASV_1241	0	1	0	23	24	11	11	0	30	0	14	29	3	25	5	12	2	0	0	0	0	0	0	0	0	0	0	0	190		Bacteria	Acidobacteria	Acidobacteria_Gp6	Unassigned	Unassigned	Gp6	Unassigned
ASV_608	0	82	0	5	4	6	4	18	13	1	12	21	8	8	0	6	0	1	0	0	0	0	0	0	0	0	0	0	189		Bacteria	Verrucomicrobia	Subdivision3	Unassigned	Unassigned	Subdivision3_genera_incertae_sedis	Unassigned
ASV_1082	2	0	0	10	10	31	6	17	4	11	32	15	7	6	2	1	4	0	0	0	0	31	0	0	0	0	0	0	189		Bacteria	Candidatus_Saccharibacteria	Unassigned	Unassigned	Unassigned	Saccharibacteria_genera_incertae_sedis	Unassigned
ASV_1145	0	0	0	0	0	0	3	10	51	19	22	32	20	17	2	8	5	0	0	0	0	0	0	0	0	0	0	0	189		Bacteria	Acidobacteria	Acidobacteria_Gp6	Unassigned	Unassigned	Gp6	Unassigned
ASV_1869	0	0	0	23	17	8	53	1	28	1	11	21	5	8	0	13	0	0	0	0	0	0	0	0	0	0	0	0	189		Bacteria	Acidobacteria	Acidobacteria_Gp6	Unassigned	Unassigned	Gp6	Unassigned
ASV_1958	0	0	0	23	16	3	18	9	14	13	35	23	4	17	6	7	1	0	0	0	0	0	0	0	0	0	0	0	189		Bacteria	Verrucomicrobia	Verrucomicrobiae	Verrucomicrobiales	Verrucomicrobiaceae	Unassigned	Unassigned
ASV_2392	0	0	0	7	1	0	6	47	13	6	11	30	3	12	1	7	25	1	4	4	0	0	0	0	0	0	11	0	189		Bacteria	Acidobacteria	Acidobacteria_Gp6	Unassigned	Unassigned	Gp6	Unassigned
ASV_609	0	0	0	0	0	98	0	0	0	41	0	4	0	0	17	0	0	0	0	1	0	0	1	0	4	1	0	21	188		Bacteria	Firmicutes	Bacilli	Bacillales	Planococcaceae	Planococcus	Planococcus_maitriensis
ASV_659	78	1	0	3	0	1	1	0	0	7	1	0	1	19	73	2	0	0	1	0	0	0	0	0	0	0	0	0	188		Bacteria	Actinobacteria	Actinobacteria	Actinomycetales	Micrococcaceae	Arthrobacter	Unassigned
ASV_727	0	2	0	35	36	15	7	1	18	3	17	21	1	8	13	11	0	0	0	0	0	0	0	0	0	0	0	0	188		Bacteria	Acidobacteria	Acidobacteria_Gp4	Unassigned	Unassigned	Aridibacter	Aridibacter_famidurans
ASV_636	0	0	0	13	101	3	36	0	21	0	5	2	0	5	0	1	0	0	0	0	0	0	0	0	0	0	0	0	187		Archaea	Thaumarchaeota	Unassigned	Nitrososphaerales	Nitrososphaeraceae	Nitrososphaera	Unassigned
ASV_671	0	2	170	0	1	0	0	0	3	0	1	3	7	0	0	0	0	0	0	0	0	0	0	0	0	0	0	0	187		Bacteria	Proteobacteria	Betaproteobacteria	Burkholderiales	Comamonadaceae	Acidovorax	Acidovorax_soli
ASV_1334	3	9	0	1	8	10	85	3	31	1	7	19	0	6	0	4	0	0	0	0	0	0	0	0	0	0	0	0	187		Bacteria	Acidobacteria	Acidobacteria_Gp6	Unassigned	Unassigned	Gp6	Unassigned
ASV_2485	10	8	0	21	54	16	5	0	16	15	10	4	4	5	2	16	1	0	0	0	0	0	0	0	0	0	0	0	187		Bacteria	Bacteroidetes	Sphingobacteriia	Sphingobacteriales	Chitinophagaceae	Unassigned	Unassigned
ASV_5776	19	0	2	5	5	9	16	1	10	18	40	40	5	11	3	3	0	0	0	0	0	0	0	0	0	0	0	0	187		Bacteria	Unassigned	Unassigned	Unassigned	Unassigned	Unassigned	Unassigned
ASV_696	5	12	0	5	8	16	37	0	22	4	27	21	16	9	1	3	0	0	0	0	0	0	0	0	0	0	0	0	186		Bacteria	Unassigned	Unassigned	Unassigned	Unassigned	Unassigned	Unassigned
ASV_1369	1	3	0	14	9	1	31	0	24	2	12	13	0	6	50	10	5	4	0	1	0	0	0	0	0	0	0	0	186		Bacteria	Unassigned	Unassigned	Unassigned	Unassigned	Unassigned	Unassigned
ASV_1732	1	0	0	19	27	2	7	15	30	5	21	25	11	12	2	9	0	0	0	0	0	0	0	0	0	0	0	0	186		Bacteria	Acidobacteria	Acidobacteria_Gp6	Unassigned	Unassigned	Gp6	Unassigned
ASV_2442	60	3	0	21	2	2	0	3	0	5	15	0	1	46	28	0	0	0	0	0	0	0	0	0	0	0	0	0	186		Bacteria	Bacteroidetes	Cytophagia	Cytophagales	Cytophagaceae	Hymenobacter	Unassigned
ASV_3659	0	1	0	8	12	12	21	26	14	4	24	15	7	23	12	4	2	1	0	0	0	0	0	0	0	0	0	0	186		Bacteria	Actinobacteria	Actinobacteria	Unassigned	Unassigned	Unassigned	Unassigned
ASV_567	0	0	0	0	0	0	0	0	0	0	0	0	0	0	0	0	17	3	62	6	15	2	22	36	4	3	8	7	185		Bacteria	Proteobacteria	Alphaproteobacteria	Unassigned	Unassigned	Unassigned	Unassigned
ASV_623	0	0	0	1	0	1	0	1	1	0	3	1	0	0	135	32	7	2	1	0	0	0	0	0	0	0	0	0	185		Bacteria	Planctomycetes	Planctomycetia	Planctomycetales	Planctomycetaceae	Unassigned	Unassigned
ASV_4462	0	0	0	26	3	21	16	31	24	8	21	18	2	10	5	0	0	0	0	0	0	0	0	0	0	0	0	0	185		Bacteria	Chloroflexi	Thermomicrobia	Unassigned	Unassigned	Unassigned	Unassigned
ASV_563	2	4	2	4	5	10	5	0	1	61	18	1	3	29	16	18	2	1	0	0	0	0	0	2	0	0	0	0	184		Bacteria	Proteobacteria	Alphaproteobacteria	Caulobacterales	Caulobacteraceae	Brevundimonas	Brevundimonas_basaltis
ASV_645	0	0	1	0	0	0	0	0	1	16	0	2	22	12	2	100	9	2	4	0	0	0	6	3	3	1	0	0	184		Bacteria	Actinobacteria	Actinobacteria	Actinomycetales	Unassigned	Unassigned	Unassigned
ASV_737	0	6	0	5	13	9	104	0	6	0	19	9	5	7	0	1	0	0	0	0	0	0	0	0	0	0	0	0	184		Bacteria	Unassigned	Unassigned	Unassigned	Unassigned	Unassigned	Unassigned
ASV_1164	0	21	0	32	19	27	3	1	9	6	30	10	11	4	1	6	2	0	1	0	0	0	0	0	0	0	0	1	184		Bacteria	Verrucomicrobia	Spartobacteria	Unassigned	Unassigned	Spartobacteria_genera_incertae_sedis	Unassigned
ASV_714	0	0	0	10	6	11	5	2	13	5	51	25	11	21	1	18	2	1	0	0	0	0	0	0	0	0	0	1	183		Bacteria	Actinobacteria	Actinobacteria	Unassigned	Unassigned	Unassigned	Unassigned
ASV_651	0	9	0	26	31	17	14	0	19	4	25	11	2	10	12	2	0	0	0	0	0	0	0	0	0	0	0	0	182		Bacteria	Planctomycetes	Planctomycetia	Planctomycetales	Planctomycetaceae	Blastopirellula	Unassigned
ASV_780	0	90	3	0	0	48	0	0	4	1	11	11	6	2	0	5	0	1	0	0	0	0	0	0	0	0	0	0	182		Bacteria	Parcubacteria	Unassigned	Unassigned	Unassigned	Parcubacteria_genera_incertae_sedis	Unassigned
ASV_2974	14	0	0	46	64	17	8	0	2	2	7	2	3	16	1	0	0	0	0	0	0	0	0	0	0	0	0	0	182		Bacteria	Bacteroidetes	Sphingobacteriia	Sphingobacteriales	Chitinophagaceae	Ferruginibacter	Ferruginibacter_yonginensis
ASV_3415	2	0	0	3	8	2	130	0	9	0	4	13	6	3	0	2	0	0	0	0	0	0	0	0	0	0	0	0	182		Bacteria	Acidobacteria	Acidobacteria_Gp6	Unassigned	Unassigned	Gp6	Unassigned
ASV_5889	1	44	0	12	7	9	31	2	7	2	25	17	3	10	5	7	0	0	0	0	0	0	0	0	0	0	0	0	182		Bacteria	Acidobacteria	Acidobacteria_Gp6	Unassigned	Unassigned	Gp6	Unassigned
ASV_673	55	25	0	39	3	15	0	0	0	1	19	1	0	18	5	0	0	0	0	0	0	0	0	0	0	0	0	0	181		Bacteria	Bacteroidetes	Cytophagia	Cytophagales	Cytophagaceae	Hymenobacter	Hymenobacter_antarcticus
ASV_953	4	6	120	4	4	6	0	1	0	4	5	1	5	18	0	1	0	0	0	0	0	1	0	0	0	0	0	0	180		Bacteria	Bacteroidetes	Flavobacteriia	Flavobacteriales	Flavobacteriaceae	Flavobacterium	Flavobacterium_swingsii
ASV_1832	2	2	0	9	20	6	88	1	24	0	7	11	0	6	2	2	0	0	0	0	0	0	0	0	0	0	0	0	180		Bacteria	Acidobacteria	Acidobacteria_Gp6	Unassigned	Unassigned	Gp6	Unassigned
ASV_706	0	33	0	12	3	29	5	2	10	8	18	11	5	12	1	7	16	3	1	3	0	0	0	0	0	0	0	0	179		Bacteria	Unassigned	Unassigned	Unassigned	Unassigned	Unassigned	Unassigned
ASV_1130	0	28	0	3	7	34	68	0	9	0	5	11	10	4	0	0	0	0	0	0	0	0	0	0	0	0	0	0	179		Bacteria	Acidobacteria	Acidobacteria_Gp6	Unassigned	Unassigned	Gp6	Unassigned
ASV_1812	0	2	0	9	19	18	23	0	47	2	16	26	1	5	2	8	0	1	0	0	0	0	0	0	0	0	0	0	179		Bacteria	Acidobacteria	Acidobacteria_Gp6	Unassigned	Unassigned	Gp6	Unassigned
ASV_2644	35	0	3	18	15	11	2	1	0	28	4	0	2	51	4	5	0	0	0	0	0	0	0	0	0	0	0	0	179		Bacteria	Proteobacteria	Alphaproteobacteria	Sphingomonadales	Sphingomonadaceae	Sphingorhabdus	Unassigned
ASV_3158	8	9	1	5	7	4	1	2	0	9	15	3	30	3	1	2	0	1	4	0	1	0	1	62	0	0	0	10	179		Bacteria	Verrucomicrobia	Verrucomicrobiae	Verrucomicrobiales	Verrucomicrobiaceae	Luteolibacter	Luteolibacter_yonseiensis
ASV_4214	17	44	44	0	0	7	0	9	2	5	5	4	35	1	1	3	0	0	0	0	0	0	1	0	0	0	0	1	179		Bacteria	Parcubacteria	Unassigned	Unassigned	Unassigned	Parcubacteria_genera_incertae_sedis	Unassigned
ASV_582	0	0	0	0	0	1	1	0	0	0	0	0	0	0	0	1	0	0	0	0	0	175	0	0	0	0	0	0	178		Bacteria	Unassigned	Unassigned	Unassigned	Unassigned	Unassigned	Unassigned
ASV_666	2	37	0	30	8	75	3	5	2	2	5	7	1	1	0	0	0	0	0	0	0	0	0	0	0	0	0	0	178		Bacteria	Candidatus_Saccharibacteria	Unassigned	Unassigned	Unassigned	Saccharibacteria_genera_incertae_sedis	Unassigned
ASV_683	0	0	4	1	2	4	0	0	101	8	11	23	3	16	1	1	3	0	0	0	0	0	0	0	0	0	0	0	178		Archaea	Euryarchaeota	Methanomicrobia	Methanosarcinales	Methanotrichaceae	Methanothrix	Methanothrix_soehngenii
ASV_886	0	0	1	95	16	30	1	0	4	1	10	6	1	7	3	3	0	0	0	0	0	0	0	0	0	0	0	0	178		Bacteria	Verrucomicrobia	Verrucomicrobiae	Verrucomicrobiales	Verrucomicrobiaceae	Luteolibacter	Unassigned
ASV_1131	1	0	0	30	12	12	19	0	19	4	21	28	12	18	0	2	0	0	0	0	0	0	0	0	0	0	0	0	178		Bacteria	Acidobacteria	Acidobacteria_Gp6	Unassigned	Unassigned	Gp6	Unassigned
ASV_2003	1	0	1	2	3	16	2	46	9	21	26	24	0	13	10	1	2	1	0	0	0	0	0	0	0	0	0	0	178		Bacteria	Unassigned	Unassigned	Unassigned	Unassigned	Unassigned	Unassigned
ASV_640	0	53	0	12	3	13	23	0	11	4	17	15	13	10	0	3	0	0	0	0	0	0	0	0	0	0	0	0	177		Bacteria	Actinobacteria	Actinobacteria	Unassigned	Unassigned	Unassigned	Unassigned
ASV_796	0	0	0	33	26	10	3	1	10	9	37	29	8	4	0	7	0	0	0	0	0	0	0	0	0	0	0	0	177		Bacteria	Acidobacteria	Acidobacteria_Gp4	Unassigned	Unassigned	Aridibacter	Aridibacter_famidurans
ASV_797	0	0	0	27	4	16	3	4	10	7	37	26	12	14	3	11	1	0	2	0	0	0	0	0	0	0	0	0	177		Bacteria	Acidobacteria	Acidobacteria_Gp4	Unassigned	Unassigned	Aridibacter	Aridibacter_famidurans
ASV_882	0	0	0	3	1	0	6	0	9	40	42	10	6	48	0	12	0	0	0	0	0	0	0	0	0	0	0	0	177		Bacteria	Verrucomicrobia	Unassigned	Unassigned	Unassigned	Unassigned	Unassigned
ASV_1015	0	10	0	13	23	29	26	2	33	1	14	13	0	4	1	8	0	0	0	0	0	0	0	0	0	0	0	0	177		Bacteria	Acidobacteria	Acidobacteria_Gp6	Unassigned	Unassigned	Gp6	Unassigned
ASV_1755	4	58	6	0	2	52	5	2	7	0	8	16	6	6	1	1	3	0	0	0	0	0	0	0	0	0	0	0	177		Bacteria	Parcubacteria	Unassigned	Unassigned	Unassigned	Parcubacteria_genera_incertae_sedis	Unassigned
ASV_3883	4	5	28	15	9	12	1	9	32	21	6	20	1	9	4	1	0	0	0	0	0	0	0	0	0	0	0	0	177		Bacteria	Candidatus_Saccharibacteria	Unassigned	Unassigned	Unassigned	Saccharibacteria_genera_incertae_sedis	Unassigned
ASV_580	0	0	0	0	0	0	0	0	0	0	0	0	0	0	0	0	33	27	33	4	7	4	2	23	14	2	5	22	176		Bacteria	Chloroflexi	Caldilineae	Caldilineales	Caldilineaceae	Unassigned	Unassigned
ASV_624	0	0	0	0	0	0	0	0	0	0	0	0	0	0	0	0	2	0	0	2	0	167	1	0	0	1	3	0	176		Bacteria	Verrucomicrobia	Verrucomicrobiae	Verrucomicrobiales	Verrucomicrobiaceae	Unassigned	Unassigned
ASV_607	87	14	0	3	3	5	0	2	0	0	9	1	0	12	39	0	0	0	0	0	0	0	0	0	0	0	0	0	175		Bacteria	Bacteroidetes	Cytophagia	Cytophagales	Cytophagaceae	Hymenobacter	Hymenobacter_ruber
ASV_618	16	2	0	3	8	0	4	0	2	4	20	1	1	39	67	6	1	0	0	0	0	0	0	0	0	0	1	0	175		Bacteria	Proteobacteria	Alphaproteobacteria	Caulobacterales	Caulobacteraceae	Brevundimonas	Unassigned
ASV_647	11	0	0	0	1	3	2	1	4	12	6	0	0	31	4	0	2	5	13	7	13	4	5	27	5	0	4	15	175		Bacteria	Proteobacteria	Alphaproteobacteria	Caulobacterales	Caulobacteraceae	Brevundimonas	Unassigned
ASV_677	17	55	0	16	1	5	0	0	0	5	11	1	1	41	22	0	0	0	0	0	0	0	0	0	0	0	0	0	175		Bacteria	Bacteroidetes	Cytophagia	Cytophagales	Cytophagaceae	Hymenobacter	Hymenobacter_elongatus
ASV_774	1	20	0	10	21	11	32	5	11	0	19	17	0	6	17	4	1	0	0	0	0	0	0	0	0	0	0	0	175		Bacteria	Actinobacteria	Actinobacteria	Unassigned	Unassigned	Unassigned	Unassigned
ASV_987	0	0	0	17	7	27	31	3	18	8	21	20	6	12	0	5	0	0	0	0	0	0	0	0	0	0	0	0	175		Bacteria	Acidobacteria	Acidobacteria_Gp6	Unassigned	Unassigned	Gp6	Unassigned
ASV_1473	0	0	1	10	7	0	3	8	18	27	29	20	34	13	1	4	0	0	0	0	0	0	0	0	0	0	0	0	175		Bacteria	Verrucomicrobia	Verrucomicrobiae	Verrucomicrobiales	Verrucomicrobiaceae	Unassigned	Unassigned
ASV_1799	1	23	0	7	1	10	2	0	2	21	39	55	8	6	0	0	0	0	0	0	0	0	0	0	0	0	0	0	175		Bacteria	Candidatus_Saccharibacteria	Unassigned	Unassigned	Unassigned	Saccharibacteria_genera_incertae_sedis	Unassigned
ASV_1915	0	0	0	42	19	37	3	0	26	1	16	7	8	2	4	10	0	0	0	0	0	0	0	0	0	0	0	0	175		Bacteria	Verrucomicrobia	Subdivision3	Unassigned	Unassigned	Subdivision3_genera_incertae_sedis	Unassigned
ASV_2905	0	31	0	8	10	20	36	0	9	1	19	18	12	5	0	5	1	0	0	0	0	0	0	0	0	0	0	0	175		Bacteria	Acidobacteria	Acidobacteria_Gp17	Unassigned	Unassigned	Gp17	Unassigned
ASV_575	0	0	0	0	1	0	0	0	1	0	0	1	0	0	0	0	0	0	0	0	0	171	0	0	0	0	0	0	174		Bacteria	Candidatus_Saccharibacteria	Unassigned	Unassigned	Unassigned	Saccharibacteria_genera_incertae_sedis	Unassigned
ASV_656	0	0	0	0	1	0	3	0	4	0	1	0	0	0	0	0	4	34	11	19	11	1	11	5	18	4	19	28	174		Bacteria	Chloroflexi	Caldilineae	Caldilineales	Caldilineaceae	Litorilinea	Litorilinea_aerophila
ASV_733	0	0	0	1	0	24	4	1	22	5	29	33	18	20	0	5	12	0	0	0	0	0	0	0	0	0	0	0	174		Bacteria	Actinobacteria	Actinobacteria	Unassigned	Unassigned	Unassigned	Unassigned
ASV_1734	1	0	0	12	14	12	40	0	17	2	22	24	11	14	1	4	0	0	0	0	0	0	0	0	0	0	0	0	174		Bacteria	Acidobacteria	Acidobacteria_Gp7	Unassigned	Unassigned	Gp7	Unassigned
ASV_2827	0	13	0	18	9	12	55	3	13	0	13	15	10	10	1	2	0	0	0	0	0	0	0	0	0	0	0	0	174		Bacteria	Acidobacteria	Acidobacteria_Gp6	Unassigned	Unassigned	Gp6	Unassigned
ASV_650	0	0	1	0	4	7	1	46	21	3	21	32	3	25	3	5	1	0	0	0	0	0	0	0	0	0	0	0	173		Bacteria	Actinobacteria	Actinobacteria	Unassigned	Unassigned	Unassigned	Unassigned
ASV_665	0	1	0	25	27	9	36	7	13	2	20	11	1	11	2	8	0	0	0	0	0	0	0	0	0	0	0	0	173		Bacteria	Acidobacteria	Acidobacteria_Gp6	Unassigned	Unassigned	Gp6	Unassigned
ASV_1156	0	3	0	13	36	15	25	3	25	0	12	11	1	7	4	11	4	0	0	0	0	3	0	0	0	0	0	0	173		Bacteria	Acidobacteria	Acidobacteria_Gp6	Unassigned	Unassigned	Gp6	Unassigned
ASV_2702	0	0	0	15	13	1	19	18	25	9	18	27	10	14	1	3	0	0	0	0	0	0	0	0	0	0	0	0	173		Bacteria	Acidobacteria	Acidobacteria_Gp6	Unassigned	Unassigned	Gp6	Unassigned
ASV_3321	0	0	0	5	15	9	40	13	24	0	12	17	8	10	0	20	0	0	0	0	0	0	0	0	0	0	0	0	173		Bacteria	Acidobacteria	Acidobacteria_Gp6	Unassigned	Unassigned	Gp6	Unassigned
ASV_975	9	0	0	28	9	4	5	2	0	15	28	5	0	56	11	0	0	0	0	0	0	0	0	0	0	0	0	0	172		Bacteria	Bacteroidetes	Cytophagia	Cytophagales	Cytophagaceae	Hymenobacter	Unassigned
ASV_2021	6	9	3	15	7	15	5	5	3	21	2	2	22	4	0	44	0	0	0	0	0	0	0	8	0	0	1	0	172		Bacteria	Proteobacteria	Betaproteobacteria	Burkholderiales	Comamonadaceae	Acidovorax	Acidovorax_soli
ASV_592	0	0	0	0	0	0	0	0	0	0	0	0	0	0	0	0	11	2	55	3	10	1	17	50	5	5	8	4	171		Bacteria	Proteobacteria	Alphaproteobacteria	Unassigned	Unassigned	Unassigned	Unassigned
ASV_597	0	164	0	2	0	0	0	0	1	0	1	2	1	0	0	0	0	0	0	0	0	0	0	0	0	0	0	0	171		Bacteria	Chloroflexi	Chloroflexia	Herpetosiphonales	Herpetosiphonaceae	Herpetosiphon	Unassigned
ASV_764	51	36	0	5	5	2	0	0	0	1	3	0	0	7	61	0	0	0	0	0	0	0	0	0	0	0	0	0	171		Bacteria	Bacteroidetes	Cytophagia	Cytophagales	Cytophagaceae	Hymenobacter	Hymenobacter_elongatus
ASV_773	1	0	0	35	18	19	9	3	11	5	29	20	7	4	5	5	0	0	0	0	0	0	0	0	0	0	0	0	171		Bacteria	Planctomycetes	Planctomycetia	Planctomycetales	Planctomycetaceae	Schlesneria	Schlesneria_paludicola
ASV_1365	6	0	0	32	7	85	2	0	1	5	4	1	0	20	7	1	0	0	0	0	0	0	0	0	0	0	0	0	171		Bacteria	Proteobacteria	Alphaproteobacteria	Sphingomonadales	Sphingomonadaceae	Novosphingobium	Unassigned
ASV_2846	0	21	0	15	15	2	15	5	20	1	30	14	2	10	13	7	0	0	0	1	0	0	0	0	0	0	0	0	171		Bacteria	candidate_division_WPS-1	Unassigned	Unassigned	Unassigned	WPS-1_genera_incertae_sedis	Unassigned
ASV_3329	0	21	0	6	10	14	26	4	26	2	26	10	14	9	2	1	0	0	0	0	0	0	0	0	0	0	0	0	171		Bacteria	Acidobacteria	Acidobacteria_Gp6	Unassigned	Unassigned	Gp6	Unassigned
ASV_686	0	0	0	0	0	0	0	0	0	0	0	0	0	0	0	0	7	25	20	4	6	8	8	1	10	16	20	45	170		Bacteria	Planctomycetes	Planctomycetia	Planctomycetales	Planctomycetaceae	Unassigned	Unassigned
ASV_610	21	34	0	9	3	42	23	0	7	0	11	14	0	5	0	0	0	0	0	0	0	0	0	0	0	0	0	0	169		Bacteria	Parcubacteria	Unassigned	Unassigned	Unassigned	Parcubacteria_genera_incertae_sedis	Unassigned
ASV_675	16	30	0	18	7	26	27	0	6	3	22	6	1	4	2	0	0	1	0	0	0	0	0	0	0	0	0	0	169		Bacteria	Parcubacteria	Unassigned	Unassigned	Unassigned	Parcubacteria_genera_incertae_sedis	Unassigned
ASV_1519	27	3	0	28	1	1	2	5	0	8	14	1	0	65	14	0	0	0	0	0	0	0	0	0	0	0	0	0	169		Bacteria	Bacteroidetes	Cytophagia	Cytophagales	Cytophagaceae	Hymenobacter	Unassigned
ASV_2797	5	0	0	13	8	14	20	16	8	9	20	24	9	10	11	1	0	1	0	0	0	0	0	0	0	0	0	0	169		Bacteria	Candidatus_Saccharibacteria	Unassigned	Unassigned	Unassigned	Saccharibacteria_genera_incertae_sedis	Unassigned
ASV_4819	12	0	0	48	5	25	4	22	9	1	22	6	1	3	11	0	0	0	0	0	0	0	0	0	0	0	0	0	169		Bacteria	Candidatus_Saccharibacteria	Unassigned	Unassigned	Unassigned	Saccharibacteria_genera_incertae_sedis	Unassigned
ASV_670	20	0	0	19	14	4	4	3	5	41	15	5	2	28	4	3	0	0	0	1	0	0	0	0	0	0	0	0	168		Bacteria	Proteobacteria	Alphaproteobacteria	Sphingomonadales	Sphingomonadaceae	Sphingorhabdus	Unassigned
ASV_4464	11	0	1	14	29	1	6	3	6	31	18	3	3	18	2	8	5	0	0	0	0	0	0	0	0	0	0	9	168		Bacteria	Bacteroidetes	Sphingobacteriia	Sphingobacteriales	Chitinophagaceae	Unassigned	Unassigned
ASV_586	1	2	0	0	0	1	0	0	0	1	0	0	0	0	0	0	3	1	1	1	6	0	2	110	3	19	2	14	167		Bacteria	Actinobacteria	Actinobacteria	Actinomycetales	Mycobacteriaceae	Mycobacterium	Unassigned
ASV_625	55	0	0	9	31	5	1	2	6	10	6	1	0	19	19	3	0	0	0	0	0	0	0	0	0	0	0	0	167		Bacteria	Proteobacteria	Alphaproteobacteria	Sphingomonadales	Sphingomonadaceae	Sphingorhabdus	Sphingorhabdus_planktonica
ASV_858	47	1	0	38	3	12	0	0	0	12	5	0	11	28	9	1	0	0	0	0	0	0	0	0	0	0	0	0	167		Bacteria	Actinobacteria	Actinobacteria	Actinomycetales	Micrococcaceae	Arthrobacter	Unassigned
ASV_1659	2	107	7	0	0	13	2	1	15	1	2	10	2	1	0	4	0	0	0	0	0	0	0	0	0	0	0	0	167		Bacteria	Parcubacteria	Unassigned	Unassigned	Unassigned	Parcubacteria_genera_incertae_sedis	Unassigned
ASV_1782	0	0	0	0	0	7	0	39	0	14	1	8	4	13	0	3	1	0	0	0	0	0	0	0	0	0	77	0	167		Bacteria	Verrucomicrobia	Verrucomicrobiae	Verrucomicrobiales	Verrucomicrobiaceae	Unassigned	Unassigned
ASV_2920	2	0	0	71	15	34	7	0	5	1	15	13	0	3	1	0	0	0	0	0	0	0	0	0	0	0	0	0	167		Bacteria	Acidobacteria	Acidobacteria_Gp4	Unassigned	Unassigned	Aridibacter	Unassigned
ASV_722	1	0	0	60	21	14	4	2	13	8	21	11	1	5	2	3	0	0	0	0	0	0	0	0	0	0	0	0	166		Bacteria	Acidobacteria	Acidobacteria_Gp4	Unassigned	Unassigned	Aridibacter	Aridibacter_famidurans
ASV_718	0	0	0	0	0	0	0	0	0	0	0	0	0	0	0	0	0	2	2	11	23	30	15	28	5	2	11	37	166		Bacteria	Proteobacteria	Alphaproteobacteria	Unassigned	Unassigned	Unassigned	Unassigned
ASV_811	0	0	16	0	0	0	0	0	0	1	0	1	1	1	0	2	6	2	9	0	5	0	1	86	4	5	2	24	166		Bacteria	Actinobacteria	Actinobacteria	Actinomycetales	Microbacteriaceae	Rhodoluna	Rhodoluna_lacicola
ASV_1630	0	0	0	23	9	17	21	27	11	6	13	13	3	6	9	5	2	1	0	0	0	0	0	0	0	0	0	0	166		Bacteria	Unassigned	Unassigned	Unassigned	Unassigned	Unassigned	Unassigned
ASV_2723	1	0	0	5	12	6	44	1	15	3	18	21	14	14	3	9	0	0	0	0	0	0	0	0	0	0	0	0	166		Bacteria	Acidobacteria	Acidobacteria_Gp6	Unassigned	Unassigned	Gp6	Unassigned
ASV_3773	9	0	0	19	79	6	14	0	9	0	6	0	0	12	11	1	0	0	0	0	0	0	0	0	0	0	0	0	166		Bacteria	Bacteroidetes	Sphingobacteriia	Sphingobacteriales	Chitinophagaceae	Ferruginibacter	Ferruginibacter_yonginensis
ASV_4651	2	0	0	37	11	24	20	1	14	0	18	15	8	12	1	1	0	1	0	0	0	0	0	0	1	0	0	0	166		Bacteria	Verrucomicrobia	Spartobacteria	Unassigned	Unassigned	Spartobacteria_genera_incertae_sedis	Unassigned
ASV_676	0	0	0	0	1	0	0	0	12	85	30	29	4	2	2	0	0	0	0	0	0	0	0	0	0	0	0	0	165		Bacteria	Candidatus_Saccharibacteria	Unassigned	Unassigned	Unassigned	Saccharibacteria_genera_incertae_sedis	Unassigned
ASV_691	0	0	0	11	26	14	40	3	25	0	19	8	3	7	4	5	0	0	0	0	0	0	0	0	0	0	0	0	165		Bacteria	Acidobacteria	Acidobacteria_Gp6	Unassigned	Unassigned	Gp6	Unassigned
ASV_655	0	17	0	5	6	29	33	0	24	1	19	8	6	14	1	1	0	0	0	0	0	0	0	0	0	0	0	0	164		Bacteria	Acidobacteria	Acidobacteria_Gp4	Unassigned	Unassigned	Gp4	Unassigned
ASV_720	0	0	0	11	15	14	22	0	32	12	23	9	11	11	0	3	0	1	0	0	0	0	0	0	0	0	0	0	164		Bacteria	Acidobacteria	Acidobacteria_Gp4	Unassigned	Unassigned	Gp4	Unassigned
ASV_775	8	2	3	7	131	1	1	0	2	1	2	1	1	0	4	0	0	0	0	0	0	0	0	0	0	0	0	0	164		Bacteria	Proteobacteria	Betaproteobacteria	Burkholderiales	Comamonadaceae	Variovorax	Variovorax_guangxiensis
ASV_3166	3	67	0	7	6	17	5	0	17	13	5	15	3	1	3	2	0	0	0	0	0	0	0	0	0	0	0	0	164		Bacteria	Candidatus_Saccharibacteria	Unassigned	Unassigned	Unassigned	Saccharibacteria_genera_incertae_sedis	Unassigned
ASV_5110	0	0	117	0	0	0	0	0	1	4	0	0	27	0	0	11	0	0	0	0	2	0	0	1	0	1	0	0	164		Bacteria	Proteobacteria	Betaproteobacteria	Burkholderiales	Comamonadaceae	Limnohabitans	Unassigned
ASV_699	0	2	0	0	2	1	150	0	0	0	4	2	0	0	2	0	0	0	0	0	0	0	0	0	0	0	0	0	163		Bacteria	Unassigned	Unassigned	Unassigned	Unassigned	Unassigned	Unassigned
ASV_635	0	7	0	17	4	3	2	9	8	21	27	32	16	11	3	1	0	0	1	0	0	0	0	0	0	0	0	0	162		Bacteria	Planctomycetes	Planctomycetia	Planctomycetales	Planctomycetaceae	Pirellula	Pirellula_staleyi
ASV_701	0	0	1	3	2	0	1	0	3	9	4	2	10	1	0	0	0	1	8	4	15	6	0	89	0	0	2	1	162		Bacteria	Verrucomicrobia	Verrucomicrobiae	Verrucomicrobiales	Verrucomicrobiaceae	Luteolibacter	Unassigned
ASV_711	0	112	0	16	6	11	1	0	1	0	6	0	1	3	3	2	0	0	0	0	0	0	0	0	0	0	0	0	162		Bacteria	Chloroflexi	Chloroflexia	Herpetosiphonales	Herpetosiphonaceae	Herpetosiphon	Unassigned
ASV_843	0	33	0	12	21	15	13	9	7	3	17	17	0	9	6	0	0	0	0	0	0	0	0	0	0	0	0	0	162		Bacteria	Candidatus_Saccharibacteria	Unassigned	Unassigned	Unassigned	Saccharibacteria_genera_incertae_sedis	Unassigned
ASV_905	14	0	0	1	1	6	0	3	0	4	0	1	3	13	62	0	28	0	0	0	0	1	0	23	0	0	2	0	162		Bacteria	Proteobacteria	Alphaproteobacteria	Sphingomonadales	Sphingomonadaceae	Sphingomonas	Unassigned
ASV_1445	0	0	0	42	19	19	23	0	9	1	21	11	5	3	7	1	1	0	0	0	0	0	0	0	0	0	0	0	162		Bacteria	Acidobacteria	Acidobacteria_Gp4	Unassigned	Unassigned	Aridibacter	Aridibacter_kavangonensis
ASV_1589	0	0	0	0	4	0	3	0	15	6	5	34	31	4	1	59	0	0	0	0	0	0	0	0	0	0	0	0	162		Bacteria	Verrucomicrobia	Verrucomicrobiae	Verrucomicrobiales	Verrucomicrobiaceae	Prosthecobacter	Unassigned
ASV_2414	0	0	0	10	11	26	26	1	22	1	21	16	4	10	1	13	0	0	0	0	0	0	0	0	0	0	0	0	162		Bacteria	Acidobacteria	Acidobacteria_Gp6	Unassigned	Unassigned	Gp6	Unassigned
ASV_620	0	160	0	0	0	0	0	0	0	0	0	0	0	0	0	0	0	0	0	0	0	0	0	1	0	0	0	0	161		Bacteria	Proteobacteria	Gammaproteobacteria	Xanthomonadales	Sinobacteraceae	Nevskia	Nevskia_ramosa
ASV_664	2	10	0	40	38	24	6	1	18	3	8	6	1	4	0	0	0	0	0	0	0	0	0	0	0	0	0	0	161		Bacteria	Candidatus_Saccharibacteria	Unassigned	Unassigned	Unassigned	Saccharibacteria_genera_incertae_sedis	Unassigned
ASV_836	0	0	0	5	0	0	1	0	8	66	28	28	8	3	0	12	0	2	0	0	0	0	0	0	0	0	0	0	161		Bacteria	Candidatus_Saccharibacteria	Unassigned	Unassigned	Unassigned	Saccharibacteria_genera_incertae_sedis	Unassigned
ASV_5745	65	2	0	10	15	12	1	0	3	15	6	1	3	18	5	4	0	0	0	0	0	0	0	1	0	0	0	0	161		Bacteria	Proteobacteria	Alphaproteobacteria	Sphingomonadales	Sphingomonadaceae	Sphingobium	Sphingobium_lactosutens
ASV_643	1	118	0	0	0	27	3	0	1	0	1	4	4	0	0	1	0	0	0	0	0	0	0	0	0	0	0	0	160		Bacteria	Parcubacteria	Unassigned	Unassigned	Unassigned	Parcubacteria_genera_incertae_sedis	Unassigned
ASV_668	0	0	0	0	0	0	0	0	0	17	0	0	1	0	127	0	1	0	0	0	0	1	0	0	0	13	0	0	160		Bacteria	Firmicutes	Bacilli	Bacillales	Bacillales_Incertae_Sedis_XII	Exiguobacterium	Unassigned
ASV_815	1	0	0	33	8	4	5	0	10	8	37	26	10	11	2	5	0	0	0	0	0	0	0	0	0	0	0	0	160		Bacteria	Verrucomicrobia	Verrucomicrobiae	Verrucomicrobiales	Verrucomicrobiaceae	Unassigned	Unassigned
ASV_1436	2	5	0	10	17	12	3	4	31	3	13	13	2	9	7	27	1	1	0	0	0	0	0	0	0	0	0	0	160		Bacteria	Acidobacteria	Acidobacteria_Gp6	Unassigned	Unassigned	Gp6	Unassigned
ASV_634	0	0	0	1	0	1	0	0	0	1	0	0	0	1	132	1	2	0	1	8	0	3	0	0	0	1	6	1	159		Bacteria	Deinococcus-Thermus	Deinococci	Deinococcales	Deinococcaceae	Deinococcus	Deinococcus_depolymerans
ASV_649	0	0	0	0	0	0	0	0	0	1	0	0	1	0	0	0	0	6	1	10	18	5	7	65	10	2	5	28	159		Bacteria	Proteobacteria	Alphaproteobacteria	Unassigned	Unassigned	Unassigned	Unassigned
ASV_772	74	0	1	13	15	10	0	1	4	11	5	5	9	5	1	4	0	0	0	0	1	0	0	0	0	0	0	0	159		Bacteria	Proteobacteria	Betaproteobacteria	Burkholderiales	Comamonadaceae	Unassigned	Unassigned
ASV_802	16	0	2	0	4	0	2	0	2	6	4	1	0	17	54	0	3	0	1	0	0	2	0	37	0	1	5	2	159		Bacteria	Proteobacteria	Alphaproteobacteria	Caulobacterales	Caulobacteraceae	Brevundimonas	Brevundimonas_denitrificans
ASV_924	0	16	0	14	6	19	19	14	19	13	17	7	6	3	3	3	0	0	0	0	0	0	0	0	0	0	0	0	159		Bacteria	Unassigned	Unassigned	Unassigned	Unassigned	Unassigned	Unassigned
ASV_657	0	0	0	0	0	5	0	0	0	1	0	6	5	2	1	131	6	1	0	0	0	0	0	0	0	0	0	0	158		Bacteria	Proteobacteria	Betaproteobacteria	Burkholderiales	Comamonadaceae	Unassigned	Unassigned
ASV_658	0	0	0	0	0	0	0	0	0	0	0	0	0	1	0	1	9	0	16	3	22	11	3	13	2	3	10	64	158		Bacteria	Proteobacteria	Alphaproteobacteria	Caulobacterales	Hyphomonadaceae	Hyphomonas	Unassigned
ASV_765	0	2	0	0	2	5	140	0	1	0	0	3	0	5	0	0	0	0	0	0	0	0	0	0	0	0	0	0	158		Bacteria	Unassigned	Unassigned	Unassigned	Unassigned	Unassigned	Unassigned
ASV_770	52	0	0	47	13	19	0	0	1	1	5	0	0	11	9	0	0	0	0	0	0	0	0	0	0	0	0	0	158		Bacteria	Proteobacteria	Alphaproteobacteria	Sphingomonadales	Sphingomonadaceae	Unassigned	Unassigned
ASV_2115	0	37	0	9	8	12	10	8	11	6	19	8	8	4	10	7	0	0	0	0	0	0	0	0	0	0	1	0	158		Bacteria	Planctomycetes	Planctomycetia	Planctomycetales	Planctomycetaceae	Pirellula	Pirellula_staleyi
ASV_637	0	0	0	0	0	0	2	93	17	13	7	18	4	2	0	0	1	0	0	0	0	0	0	0	0	0	0	0	157		Bacteria	Proteobacteria	Unassigned	Unassigned	Unassigned	Unassigned	Unassigned
ASV_678	97	0	0	0	0	23	3	2	0	0	0	0	0	27	5	0	0	0	0	0	0	0	0	0	0	0	0	0	157		Bacteria	Bacteroidetes	Flavobacteriia	Flavobacteriales	Flavobacteriaceae	Chryseobacterium	Unassigned
ASV_875	0	0	0	18	15	32	17	0	19	0	21	16	7	7	2	1	2	0	0	0	0	0	0	0	0	0	0	0	157		Bacteria	Acidobacteria	Acidobacteria_Gp4	Unassigned	Unassigned	Aridibacter	Aridibacter_famidurans
ASV_663	0	0	0	0	0	0	0	0	0	0	0	0	0	0	0	0	3	2	2	1	7	9	2	18	2	1	8	101	156		Bacteria	Proteobacteria	Alphaproteobacteria	Rhodospirillales	Acetobacteraceae	Roseomonas	Unassigned
ASV_685	64	3	0	0	4	1	1	2	1	1	3	2	0	9	64	0	0	0	0	0	0	0	0	1	0	0	0	0	156		Bacteria	Proteobacteria	Alphaproteobacteria	Caulobacterales	Caulobacteraceae	Brevundimonas	Unassigned
ASV_728	0	4	43	0	0	1	0	0	7	21	3	9	55	1	0	12	0	0	0	0	0	0	0	0	0	0	0	0	156		Bacteria	Bacteroidetes	Flavobacteriia	Flavobacteriales	Flavobacteriaceae	Flavobacterium	Unassigned
ASV_738	9	14	0	5	25	7	1	0	3	0	1	0	1	15	75	0	0	0	0	0	0	0	0	0	0	0	0	0	156		Bacteria	Proteobacteria	Betaproteobacteria	Burkholderiales	Oxalobacteraceae	Massilia	Unassigned
ASV_742	0	0	0	0	0	0	0	0	0	1	0	0	0	1	19	117	18	0	0	0	0	0	0	0	0	0	0	0	156		Bacteria	Proteobacteria	Alphaproteobacteria	Rhizobiales	Bradyrhizobiaceae	Rhodoblastus	Unassigned
ASV_816	0	0	0	30	13	19	16	0	27	0	17	16	3	12	0	3	0	0	0	0	0	0	0	0	0	0	0	0	156		Bacteria	Acidobacteria	Acidobacteria_Gp4	Unassigned	Unassigned	Gp4	Unassigned
ASV_1063	21	18	0	6	2	0	0	1	0	0	4	1	0	18	85	0	0	0	0	0	0	0	0	0	0	0	0	0	156		Bacteria	Bacteroidetes	Cytophagia	Cytophagales	Cytophagaceae	Hymenobacter	Unassigned
ASV_1244	0	20	0	22	14	4	1	1	7	7	28	18	6	9	0	11	0	2	0	0	1	1	0	1	3	0	0	0	156		Bacteria	Verrucomicrobia	Spartobacteria	Unassigned	Unassigned	Spartobacteria_genera_incertae_sedis	Unassigned
ASV_2600	0	0	0	10	8	9	29	10	9	4	23	24	6	11	7	6	0	0	0	0	0	0	0	0	0	0	0	0	156		Bacteria	Planctomycetes	Planctomycetia	Planctomycetales	Planctomycetaceae	Unassigned	Unassigned
ASV_4251	0	36	0	23	8	3	14	12	13	2	14	13	6	3	8	1	0	0	0	0	0	0	0	0	0	0	0	0	156		Bacteria	Planctomycetes	Planctomycetia	Planctomycetales	Planctomycetaceae	Singulisphaera	Unassigned
ASV_667	0	0	0	0	0	0	0	0	0	1	1	0	2	0	0	0	3	0	3	3	17	0	4	60	10	24	14	13	155		Bacteria	Actinobacteria	Actinobacteria	Actinomycetales	Mycobacteriaceae	Mycobacterium	Unassigned
ASV_749	0	0	147	0	0	0	0	0	2	0	0	1	3	0	0	2	0	0	0	0	0	0	0	0	0	0	0	0	155		Bacteria	Proteobacteria	Betaproteobacteria	Burkholderiales	Comamonadaceae	Unassigned	Unassigned
ASV_1358	2	11	0	5	19	28	17	1	41	0	5	14	0	9	2	1	0	0	0	0	0	0	0	0	0	0	0	0	155		Bacteria	Acidobacteria	Acidobacteria_Gp6	Unassigned	Unassigned	Gp6	Unassigned
ASV_692	74	4	0	28	1	6	2	0	1	2	13	1	0	17	5	0	0	0	0	0	0	0	0	0	0	0	0	0	154		Bacteria	Bacteroidetes	Cytophagia	Cytophagales	Cytophagaceae	Hymenobacter	Hymenobacter_antarcticus
ASV_713	0	0	0	0	0	0	0	0	1	0	1	0	0	1	0	0	6	20	12	9	8	1	15	5	22	4	17	32	154		Bacteria	Chloroflexi	Caldilineae	Caldilineales	Caldilineaceae	Litorilinea	Litorilinea_aerophila
ASV_745	0	135	0	6	2	0	0	0	1	0	8	0	1	0	0	1	0	0	0	0	0	0	0	0	0	0	0	0	154		Bacteria	Chloroflexi	Chloroflexia	Herpetosiphonales	Herpetosiphonaceae	Herpetosiphon	Unassigned
ASV_1414	1	21	0	5	35	13	6	12	6	0	22	15	0	4	12	2	0	0	0	0	0	0	0	0	0	0	0	0	154		Bacteria	Candidatus_Saccharibacteria	Unassigned	Unassigned	Unassigned	Saccharibacteria_genera_incertae_sedis	Unassigned
ASV_1450	13	0	0	18	85	5	2	0	3	0	9	0	0	12	6	1	0	0	0	0	0	0	0	0	0	0	0	0	154		Bacteria	Bacteroidetes	Sphingobacteriia	Sphingobacteriales	Chitinophagaceae	Unassigned	Unassigned
ASV_2882	0	0	0	0	0	0	0	0	0	0	0	0	0	0	0	0	0	0	2	5	3	5	6	100	9	3	0	21	154		Bacteria	Proteobacteria	Betaproteobacteria	Burkholderiales	Unassigned	Unassigned	Unassigned
ASV_4208	2	0	0	23	24	2	23	6	16	0	21	18	5	9	2	3	0	0	0	0	0	0	0	0	0	0	0	0	154		Bacteria	candidate_division_WPS-1	Unassigned	Unassigned	Unassigned	WPS-1_genera_incertae_sedis	Unassigned
ASV_739	8	38	0	15	7	42	0	0	3	5	6	5	4	14	6	0	0	0	0	0	0	0	0	0	0	0	0	0	153		Bacteria	Proteobacteria	Betaproteobacteria	Burkholderiales	Oxalobacteraceae	Massilia	Massilia_aerilata
ASV_832	0	118	0	0	0	2	3	0	0	0	8	4	1	0	0	1	2	0	0	0	0	14	0	0	0	0	0	0	153		Bacteria	Candidatus_Saccharibacteria	Unassigned	Unassigned	Unassigned	Saccharibacteria_genera_incertae_sedis	Unassigned
ASV_834	0	0	0	1	1	0	0	102	1	7	13	22	3	3	0	0	0	0	0	0	0	0	0	0	0	0	0	0	153		Bacteria	Candidatus_Saccharibacteria	Unassigned	Unassigned	Unassigned	Saccharibacteria_genera_incertae_sedis	Unassigned
ASV_921	0	0	0	0	3	15	86	0	5	0	21	12	6	4	0	1	0	0	0	0	0	0	0	0	0	0	0	0	153		Bacteria	Unassigned	Unassigned	Unassigned	Unassigned	Unassigned	Unassigned
ASV_1581	44	12	0	5	7	24	0	5	2	27	3	3	6	3	10	0	0	0	0	1	0	0	0	0	0	0	1	0	153		Bacteria	Actinobacteria	Actinobacteria	Actinomycetales	Microbacteriaceae	Cryobacterium	Cryobacterium_luteum
ASV_3813	0	0	0	0	0	0	0	0	0	0	0	0	0	0	0	0	1	3	5	5	11	6	4	78	5	5	1	29	153		Bacteria	Proteobacteria	Betaproteobacteria	Burkholderiales	Unassigned	Unassigned	Unassigned
ASV_831	0	0	139	0	0	0	0	0	0	3	1	0	9	0	0	0	0	0	0	0	0	0	0	0	0	0	0	0	152		Bacteria	Bacteroidetes	Flavobacteriia	Flavobacteriales	Flavobacteriaceae	Flavobacterium	Unassigned
ASV_2777	0	0	0	0	0	0	0	2	1	0	0	0	0	0	0	0	7	23	25	7	3	4	6	9	13	21	10	21	152		Bacteria	Verrucomicrobia	Spartobacteria	Unassigned	Unassigned	Spartobacteria_genera_incertae_sedis	Unassigned
ASV_680	2	2	0	0	0	0	0	0	0	0	0	1	0	1	2	0	4	5	3	1	8	0	1	79	10	7	6	19	151		Bacteria	Actinobacteria	Actinobacteria	Actinomycetales	Mycobacteriaceae	Mycobacterium	Unassigned
ASV_693	0	0	0	0	0	0	0	0	0	0	0	0	0	0	0	0	1	1	4	3	9	1	9	91	12	3	5	12	151		Bacteria	Proteobacteria	Alphaproteobacteria	Rickettsiales	Rickettsiaceae	Rickettsia	Unassigned
ASV_767	0	43	0	21	8	28	3	0	12	3	9	4	14	5	1	0	0	0	0	0	0	0	0	0	0	0	0	0	151		Bacteria	Actinobacteria	Actinobacteria	Unassigned	Unassigned	Unassigned	Unassigned
ASV_2703	1	18	0	20	31	19	3	1	9	1	27	12	1	5	0	3	0	0	0	0	0	0	0	0	0	0	0	0	151		Bacteria	Chloroflexi	Unassigned	Unassigned	Unassigned	Unassigned	Unassigned
ASV_3864	7	3	3	5	6	25	1	2	24	20	12	28	3	6	4	0	0	0	0	0	0	0	0	0	0	0	2	0	151		Bacteria	Candidatus_Saccharibacteria	Unassigned	Unassigned	Unassigned	Saccharibacteria_genera_incertae_sedis	Unassigned
ASV_4595	0	0	0	32	26	0	29	2	16	1	14	6	2	6	7	7	2	1	0	0	0	0	0	0	0	0	0	0	151		Bacteria	Verrucomicrobia	Spartobacteria	Unassigned	Unassigned	Spartobacteria_genera_incertae_sedis	Unassigned
ASV_4608	0	0	0	8	7	25	22	0	49	2	8	16	4	9	0	1	0	0	0	0	0	0	0	0	0	0	0	0	151		Bacteria	Acidobacteria	Acidobacteria_Gp6	Unassigned	Unassigned	Gp6	Unassigned
ASV_662	0	0	0	0	0	0	0	0	0	0	0	0	0	0	55	43	26	8	11	1	0	0	0	0	1	1	4	0	150		Bacteria	Planctomycetes	Planctomycetia	Planctomycetales	Planctomycetaceae	Unassigned	Unassigned
ASV_661	0	0	40	16	0	1	3	10	5	6	35	20	4	7	2	1	0	0	0	0	0	0	0	0	0	0	0	0	150		Bacteria	Parcubacteria	Unassigned	Unassigned	Unassigned	Parcubacteria_genera_incertae_sedis	Unassigned
ASV_688	0	0	0	0	0	0	0	0	0	0	0	0	0	0	0	0	7	26	12	81	2	0	18	0	0	0	2	2	150		Bacteria	Parcubacteria	Unassigned	Unassigned	Unassigned	Parcubacteria_genera_incertae_sedis	Unassigned
ASV_761	0	0	0	111	3	33	0	0	0	0	2	1	0	0	0	0	0	0	0	0	0	0	0	0	0	0	0	0	150		Bacteria	Deinococcus-Thermus	Deinococci	Deinococcales	Deinococcaceae	Deinococcus	Unassigned
ASV_807	0	0	0	4	1	2	1	4	7	20	58	27	6	17	2	1	0	0	0	0	0	0	0	0	0	0	0	0	150		Bacteria	Candidatus_Saccharibacteria	Unassigned	Unassigned	Unassigned	Saccharibacteria_genera_incertae_sedis	Unassigned
ASV_1021	4	0	0	4	2	0	9	94	2	2	10	12	4	6	1	0	0	0	0	0	0	0	0	0	0	0	0	0	150		Bacteria	Candidatus_Saccharibacteria	Unassigned	Unassigned	Unassigned	Saccharibacteria_genera_incertae_sedis	Unassigned
ASV_2109	9	3	1	13	28	14	3	0	13	18	11	4	2	13	0	10	4	0	1	0	1	0	0	1	0	0	1	0	150		Bacteria	Bacteroidetes	Sphingobacteriia	Sphingobacteriales	Chitinophagaceae	Unassigned	Unassigned
ASV_721	11	1	2	18	61	25	3	0	1	2	3	2	4	2	0	14	0	0	0	0	0	0	0	0	0	0	0	0	149		Bacteria	Proteobacteria	Betaproteobacteria	Burkholderiales	Comamonadaceae	Variovorax	Unassigned
ASV_726	3	0	0	0	0	1	0	1	0	0	0	0	0	0	0	1	53	0	4	0	0	0	0	2	0	0	84	0	149		Bacteria	Actinobacteria	Actinobacteria	Solirubrobacterales	Unassigned	Unassigned	Unassigned
ASV_1108	0	0	0	14	3	0	17	13	7	0	65	20	2	6	0	2	0	0	0	0	0	0	0	0	0	0	0	0	149		Bacteria	Planctomycetes	Planctomycetia	Planctomycetales	Planctomycetaceae	Unassigned	Unassigned
ASV_1967	0	0	0	13	13	2	19	1	8	1	16	24	4	21	1	24	2	0	0	0	0	0	0	0	0	0	0	0	149		Bacteria	Acidobacteria	Acidobacteria_Gp6	Unassigned	Unassigned	Gp6	Unassigned
ASV_646	0	0	0	0	0	0	0	0	0	0	0	0	0	0	0	0	4	6	4	9	10	3	6	43	9	1	12	41	148		Bacteria	Proteobacteria	Alphaproteobacteria	Caulobacterales	Hyphomonadaceae	Unassigned	Unassigned
ASV_716	61	0	0	22	11	34	0	0	0	0	5	1	0	10	4	0	0	0	0	0	0	0	0	0	0	0	0	0	148		Bacteria	Proteobacteria	Alphaproteobacteria	Sphingomonadales	Sphingomonadaceae	Unassigned	Unassigned
ASV_824	0	12	0	34	11	19	1	2	9	0	19	21	11	8	1	0	0	0	0	0	0	0	0	0	0	0	0	0	148		Bacteria	Unassigned	Unassigned	Unassigned	Unassigned	Unassigned	Unassigned
ASV_827	0	0	0	11	7	15	4	0	14	8	25	24	22	10	2	6	0	0	0	0	0	0	0	0	0	0	0	0	148		Bacteria	Verrucomicrobia	Verrucomicrobiae	Verrucomicrobiales	Verrucomicrobiaceae	Unassigned	Unassigned
ASV_835	0	87	0	0	0	36	7	0	0	0	0	8	3	5	0	2	0	0	0	0	0	0	0	0	0	0	0	0	148		Bacteria	Parcubacteria	Unassigned	Unassigned	Unassigned	Parcubacteria_genera_incertae_sedis	Unassigned
ASV_841	0	0	0	0	0	0	0	0	31	26	46	26	12	3	0	4	0	0	0	0	0	0	0	0	0	0	0	0	148		Bacteria	Candidatus_Saccharibacteria	Unassigned	Unassigned	Unassigned	Saccharibacteria_genera_incertae_sedis	Unassigned
ASV_918	0	0	0	10	21	9	43	0	16	1	9	15	1	14	5	4	0	0	0	0	0	0	0	0	0	0	0	0	148		Bacteria	Acidobacteria	Acidobacteria_Gp4	Unassigned	Unassigned	Gp4	Unassigned
ASV_760	32	34	0	4	3	1	0	2	3	51	1	0	5	7	2	2	0	0	0	0	0	0	0	0	0	0	0	0	147		Bacteria	Actinobacteria	Actinobacteria	Actinomycetales	Microbacteriaceae	Cryobacterium	Cryobacterium_arcticum
ASV_806	17	14	0	18	5	34	0	0	3	21	4	2	6	17	1	0	1	0	0	2	1	1	0	0	0	0	0	0	147		Bacteria	Actinobacteria	Actinobacteria	Actinomycetales	Nocardioidaceae	Nocardioides	Unassigned
ASV_962	8	2	0	38	21	41	1	0	4	6	3	0	3	18	1	1	0	0	0	0	0	0	0	0	0	0	0	0	147		Bacteria	Proteobacteria	Alphaproteobacteria	Sphingomonadales	Sphingomonadaceae	Unassigned	Unassigned
ASV_978	0	0	0	7	8	26	27	0	21	4	19	14	6	10	1	3	0	1	0	0	0	0	0	0	0	0	0	0	147		Bacteria	Acidobacteria	Acidobacteria_Gp6	Unassigned	Unassigned	Gp6	Unassigned
ASV_990	0	20	0	5	2	8	5	50	9	5	16	18	3	3	1	2	0	0	0	0	0	0	0	0	0	0	0	0	147		Bacteria	Candidatus_Saccharibacteria	Unassigned	Unassigned	Unassigned	Saccharibacteria_genera_incertae_sedis	Unassigned
ASV_1687	4	0	0	3	0	17	7	23	4	7	51	22	2	3	0	2	1	1	0	0	0	0	0	0	0	0	0	0	147		Bacteria	Candidatus_Saccharibacteria	Unassigned	Unassigned	Unassigned	Saccharibacteria_genera_incertae_sedis	Unassigned
ASV_752	1	96	1	0	0	33	2	0	2	1	4	1	3	0	0	0	1	1	0	0	0	0	0	0	0	0	0	0	146		Bacteria	Parcubacteria	Unassigned	Unassigned	Unassigned	Parcubacteria_genera_incertae_sedis	Unassigned
ASV_1141	8	0	0	1	0	2	0	1	0	1	5	0	10	12	18	1	2	0	10	0	24	4	0	8	5	0	34	0	146		Bacteria	Proteobacteria	Alphaproteobacteria	Caulobacterales	Caulobacteraceae	Brevundimonas	Unassigned
ASV_1373	0	0	0	14	3	2	3	0	15	19	14	25	12	13	0	20	2	1	3	0	0	0	0	0	0	0	0	0	146		Bacteria	Verrucomicrobia	Spartobacteria	Unassigned	Unassigned	Spartobacteria_genera_incertae_sedis	Unassigned
ASV_2423	0	0	0	3	10	18	9	22	14	4	32	17	5	9	1	2	0	0	0	0	0	0	0	0	0	0	0	0	146		Bacteria	Planctomycetes	Planctomycetia	Planctomycetales	Planctomycetaceae	Unassigned	Unassigned
ASV_4467	1	20	0	5	2	26	31	0	19	1	6	16	11	5	0	3	0	0	0	0	0	0	0	0	0	0	0	0	146		Bacteria	Acidobacteria	Acidobacteria_Gp6	Unassigned	Unassigned	Gp6	Unassigned
ASV_789	0	0	2	2	26	14	2	31	8	4	23	21	2	8	0	2	0	0	0	0	0	0	0	0	0	0	0	0	145		Bacteria	Verrucomicrobia	Verrucomicrobiae	Verrucomicrobiales	Verrucomicrobiaceae	Unassigned	Unassigned
ASV_859	35	1	0	2	0	1	0	0	0	0	2	0	0	6	98	0	0	0	0	0	0	0	0	0	0	0	0	0	145		Bacteria	Bacteroidetes	Cytophagia	Cytophagales	Cytophagaceae	Hymenobacter	Hymenobacter_glaciei
ASV_2086	1	15	0	5	5	11	3	45	6	4	11	8	7	17	7	0	0	0	0	0	0	0	0	0	0	0	0	0	145		Bacteria	Candidatus_Saccharibacteria	Unassigned	Unassigned	Unassigned	Saccharibacteria_genera_incertae_sedis	Unassigned
ASV_2426	2	16	0	15	7	17	13	3	7	3	31	19	2	7	1	0	1	0	0	0	0	1	0	0	0	0	0	0	145		Bacteria	Candidatus_Saccharibacteria	Unassigned	Unassigned	Unassigned	Saccharibacteria_genera_incertae_sedis	Unassigned
ASV_2441	0	0	0	12	5	0	1	32	6	7	10	5	15	8	0	3	3	3	20	0	2	1	0	6	3	0	0	3	145		Bacteria	Verrucomicrobia	Verrucomicrobiae	Verrucomicrobiales	Verrucomicrobiaceae	Luteolibacter	Unassigned
ASV_3222	0	0	0	6	3	0	7	28	13	2	19	26	2	0	7	7	0	0	0	0	0	0	0	0	0	0	25	0	145		Bacteria	Planctomycetes	Planctomycetia	Planctomycetales	Planctomycetaceae	Unassigned	Unassigned
ASV_682	0	0	0	0	0	0	0	0	0	0	0	0	0	0	0	0	0	0	0	3	0	0	0	0	0	0	141	0	144		Bacteria	Parcubacteria	Unassigned	Unassigned	Unassigned	Parcubacteria_genera_incertae_sedis	Unassigned
ASV_724	0	0	0	0	0	0	0	0	0	0	0	0	0	0	0	0	3	2	1	0	0	3	1	111	6	0	4	13	144		Bacteria	Actinobacteria	Actinobacteria	Actinomycetales	Microbacteriaceae	Unassigned	Unassigned
ASV_881	0	0	3	0	3	4	1	0	15	40	4	4	9	7	0	47	1	0	0	0	0	1	0	0	0	2	0	3	144		Bacteria	Proteobacteria	Betaproteobacteria	Burkholderiales	Comamonadaceae	Hydrogenophaga	Hydrogenophaga_intermedia
ASV_929	2	0	0	20	68	14	1	1	1	0	5	2	0	17	7	2	1	0	0	0	0	0	0	0	0	0	3	0	144		Bacteria	Proteobacteria	Gammaproteobacteria	Xanthomonadales	Xanthomonadaceae	Unassigned	Unassigned
ASV_1366	0	124	0	0	0	14	1	0	1	0	0	1	0	0	0	3	0	0	0	0	0	0	0	0	0	0	0	0	144		Bacteria	Unassigned	Unassigned	Unassigned	Unassigned	Unassigned	Unassigned
ASV_2049	6	32	0	18	7	9	12	0	5	1	16	16	2	18	1	1	0	0	0	0	0	0	0	0	0	0	0	0	144		Bacteria	Acidobacteria	Acidobacteria_Gp6	Unassigned	Unassigned	Gp6	Unassigned
ASV_2494	0	0	0	12	15	56	21	1	13	0	12	7	0	2	3	2	0	0	0	0	0	0	0	0	0	0	0	0	144		Bacteria	Acidobacteria	Acidobacteria_Gp4	Unassigned	Unassigned	Aridibacter	Unassigned
ASV_4453	0	0	2	15	1	7	5	65	7	5	13	6	5	12	1	0	0	0	0	0	0	0	0	0	0	0	0	0	144		Bacteria	Candidatus_Saccharibacteria	Unassigned	Unassigned	Unassigned	Saccharibacteria_genera_incertae_sedis	Unassigned
ASV_5902	0	0	0	8	8	13	9	0	18	3	12	16	14	9	2	26	5	0	1	0	0	0	0	0	0	0	0	0	144		Bacteria	Latescibacteria	Unassigned	Unassigned	Unassigned	Latescibacteria_genera_incertae_sedis	Unassigned
ASV_798	5	0	0	16	18	31	3	0	7	14	10	4	4	22	2	6	0	0	0	0	0	0	0	0	0	0	1	0	143		Bacteria	Proteobacteria	Alphaproteobacteria	Sphingomonadales	Sphingomonadaceae	Parablastomonas	Parablastomonas_arctica
ASV_810	71	0	1	2	0	0	0	0	0	12	1	1	0	14	41	0	0	0	0	0	0	0	0	0	0	0	0	0	143		Bacteria	Actinobacteria	Actinobacteria	Actinomycetales	Micrococcaceae	Arthrobacter	Unassigned
ASV_833	1	1	1	10	13	21	31	14	13	0	9	13	2	6	2	6	0	0	0	0	0	0	0	0	0	0	0	0	143		Bacteria	Acidobacteria	Acidobacteria_Gp6	Unassigned	Unassigned	Gp6	Unassigned
ASV_963	9	6	0	38	40	24	1	0	0	9	8	5	1	2	0	0	0	0	0	0	0	0	0	0	0	0	0	0	143		Bacteria	Bacteroidetes	Sphingobacteriia	Sphingobacteriales	Chitinophagaceae	Ferruginibacter	Ferruginibacter_yonginensis
ASV_1488	0	44	3	0	1	66	3	3	1	0	2	5	5	1	0	7	1	0	0	0	0	1	0	0	0	0	0	0	143		Bacteria	Parcubacteria	Unassigned	Unassigned	Unassigned	Parcubacteria_genera_incertae_sedis	Unassigned
ASV_1570	10	0	0	1	0	2	0	2	0	2	1	0	0	1	91	0	10	0	0	0	0	0	0	19	1	0	3	0	143		Bacteria	Proteobacteria	Alphaproteobacteria	Caulobacterales	Caulobacteraceae	Asticcacaulis	Unassigned
ASV_2417	0	41	0	8	1	8	35	1	13	0	6	10	3	8	0	9	0	0	0	0	0	0	0	0	0	0	0	0	143		Bacteria	Acidobacteria	Acidobacteria_Gp6	Unassigned	Unassigned	Gp6	Unassigned
ASV_786	0	0	0	0	0	0	0	0	0	2	0	0	0	0	0	0	9	4	9	5	11	3	9	39	13	17	6	15	142		Bacteria	Proteobacteria	Alphaproteobacteria	Rhodobacterales	Rhodobacteraceae	Unassigned	Unassigned
ASV_837	0	0	0	0	0	0	0	0	0	0	0	0	0	0	0	0	1	1	6	20	15	1	12	55	12	7	2	10	142		Bacteria	Proteobacteria	Betaproteobacteria	Burkholderiales	Oxalobacteraceae	Unassigned	Unassigned
ASV_922	0	3	0	0	1	1	127	0	0	1	1	6	0	0	2	0	0	0	0	0	0	0	0	0	0	0	0	0	142		Bacteria	Unassigned	Unassigned	Unassigned	Unassigned	Unassigned	Unassigned
ASV_930	0	2	0	0	0	0	0	0	0	3	1	0	0	0	1	0	0	3	0	0	11	20	0	0	0	0	30	71	142		Bacteria	Firmicutes	Bacilli	Bacillales	Planococcaceae	Paenisporosarcina	Unassigned
ASV_1956	0	0	0	0	0	0	2	1	47	12	16	32	7	8	0	8	6	0	3	0	0	0	0	0	0	0	0	0	142		Bacteria	Acidobacteria	Acidobacteria_Gp6	Unassigned	Unassigned	Gp6	Unassigned
ASV_3046	0	0	0	7	9	7	16	4	18	4	15	15	11	4	1	30	1	0	0	0	0	0	0	0	0	0	0	0	142		Bacteria	Acidobacteria	Acidobacteria_Gp6	Unassigned	Unassigned	Gp6	Unassigned
ASV_3924	0	0	0	1	3	3	81	1	5	0	9	12	6	7	0	12	2	0	0	0	0	0	0	0	0	0	0	0	142		Bacteria	Acidobacteria	Acidobacteria_Gp17	Unassigned	Unassigned	Gp17	Unassigned
ASV_748	0	0	0	2	4	0	2	0	2	9	26	57	16	20	2	0	0	1	0	0	0	0	0	0	0	0	0	0	141		Bacteria	Candidatus_Saccharibacteria	Unassigned	Unassigned	Unassigned	Saccharibacteria_genera_incertae_sedis	Unassigned
ASV_879	18	0	0	24	19	27	1	0	7	3	8	6	2	18	6	2	0	0	0	0	0	0	0	0	0	0	0	0	141		Bacteria	Proteobacteria	Alphaproteobacteria	Sphingomonadales	Sphingomonadaceae	Sphingomonas	Unassigned
ASV_891	0	0	14	0	0	0	0	0	0	5	0	0	1	2	0	2	4	1	7	0	3	2	1	75	2	9	2	11	141		Bacteria	Actinobacteria	Actinobacteria	Actinomycetales	Microbacteriaceae	Rhodoluna	Rhodoluna_lacicola
ASV_895	0	43	0	26	8	15	2	2	5	3	17	15	0	1	3	1	0	0	0	0	0	0	0	0	0	0	0	0	141		Bacteria	Unassigned	Unassigned	Unassigned	Unassigned	Unassigned	Unassigned
ASV_1835	0	0	0	0	11	18	46	0	21	2	8	20	5	4	0	6	0	0	0	0	0	0	0	0	0	0	0	0	141		Bacteria	Acidobacteria	Acidobacteria_Gp6	Unassigned	Unassigned	Gp6	Unassigned
ASV_4339	0	0	0	5	13	11	21	0	22	2	31	16	6	10	3	1	0	0	0	0	0	0	0	0	0	0	0	0	141		Bacteria	Acidobacteria	Acidobacteria_Gp7	Unassigned	Unassigned	Gp7	Unassigned
ASV_5468	0	13	0	38	20	9	4	3	4	2	20	7	3	8	0	10	0	0	0	0	0	0	0	0	0	0	0	0	141		Bacteria	Verrucomicrobia	Spartobacteria	Unassigned	Unassigned	Spartobacteria_genera_incertae_sedis	Unassigned
ASV_750	13	0	0	12	0	0	0	6	1	5	13	4	2	54	29	1	0	0	0	0	0	0	0	0	0	0	0	0	140		Bacteria	Bacteroidetes	Cytophagia	Cytophagales	Cytophagaceae	Hymenobacter	Hymenobacter_elongatus
ASV_845	0	0	1	0	1	35	3	0	4	12	13	5	3	22	2	0	0	15	0	0	0	24	0	0	0	0	0	0	140		Bacteria	Candidatus_Saccharibacteria	Unassigned	Unassigned	Unassigned	Saccharibacteria_genera_incertae_sedis	Unassigned
ASV_2159	0	0	0	4	14	4	76	0	13	0	12	4	0	7	5	1	0	0	0	0	0	0	0	0	0	0	0	0	140		Bacteria	Acidobacteria	Acidobacteria_Gp6	Unassigned	Unassigned	Gp6	Unassigned
ASV_790	0	6	0	19	24	12	5	4	14	2	17	15	1	6	5	9	0	0	0	0	0	0	0	0	0	0	0	0	139		Bacteria	Acidobacteria	Acidobacteria_Gp4	Unassigned	Unassigned	Aridibacter	Aridibacter_famidurans
ASV_869	0	0	0	5	103	0	18	0	8	0	2	0	0	2	1	0	0	0	0	0	0	0	0	0	0	0	0	0	139		Archaea	Thaumarchaeota	Unassigned	Nitrososphaerales	Nitrososphaeraceae	Nitrososphaera	Unassigned
ASV_1026	0	0	0	2	2	12	0	1	24	2	21	37	2	22	3	3	7	0	1	0	0	0	0	0	0	0	0	0	139		Bacteria	Actinobacteria	Actinobacteria	Unassigned	Unassigned	Unassigned	Unassigned
ASV_1090	0	2	0	14	9	14	10	1	19	6	22	16	9	10	0	7	0	0	0	0	0	0	0	0	0	0	0	0	139		Bacteria	Acidobacteria	Acidobacteria_Gp6	Unassigned	Unassigned	Gp6	Unassigned
ASV_3026	6	11	0	58	18	7	2	0	15	4	6	6	2	3	0	0	0	0	0	0	0	1	0	0	0	0	0	0	139		Bacteria	Candidatus_Saccharibacteria	Unassigned	Unassigned	Unassigned	Saccharibacteria_genera_incertae_sedis	Unassigned
ASV_5940	0	0	0	9	17	5	56	2	15	0	7	16	1	6	0	5	0	0	0	0	0	0	0	0	0	0	0	0	139		Bacteria	Acidobacteria	Acidobacteria_Gp6	Unassigned	Unassigned	Gp6	Unassigned
ASV_700	0	138	0	0	0	0	0	0	0	0	0	0	0	0	0	0	0	0	0	0	0	0	0	0	0	0	0	0	138		Bacteria	Proteobacteria	Gammaproteobacteria	Xanthomonadales	Sinobacteraceae	Nevskia	Nevskia_ramosa
ASV_757	0	0	0	0	0	3	0	0	0	0	0	0	0	0	0	0	0	0	0	0	104	0	0	0	1	0	2	28	138		Bacteria	Proteobacteria	Betaproteobacteria	Burkholderiales	Burkholderiaceae	Limnobacter	Limnobacter_thiooxidans
ASV_788	0	0	57	2	1	1	2	5	7	1	32	16	0	2	10	2	0	0	0	0	0	0	0	0	0	0	0	0	138		Bacteria	Parcubacteria	Unassigned	Unassigned	Unassigned	Parcubacteria_genera_incertae_sedis	Unassigned
ASV_1636	2	0	0	42	10	35	1	0	1	5	8	9	1	13	9	2	0	0	0	0	0	0	0	0	0	0	0	0	138		Bacteria	Deinococcus-Thermus	Deinococci	Deinococcales	Deinococcaceae	Deinococcus	Deinococcus_xinjiangensis
ASV_3906	4	0	2	8	96	6	0	0	3	2	3	1	11	1	0	1	0	0	0	0	0	0	0	0	0	0	0	0	138		Bacteria	Proteobacteria	Betaproteobacteria	Burkholderiales	Comamonadaceae	Unassigned	Unassigned
ASV_769	1	10	0	18	20	27	3	0	13	11	10	9	1	6	7	1	0	0	0	0	0	0	0	0	0	0	0	0	137		Bacteria	Planctomycetes	Planctomycetia	Planctomycetales	Planctomycetaceae	Unassigned	Unassigned
ASV_1179	0	0	0	37	13	5	12	8	14	1	27	14	1	2	1	1	0	0	0	0	0	0	0	0	0	0	1	0	137		Bacteria	Chloroflexi	Caldilineae	Caldilineales	Caldilineaceae	Litorilinea	Litorilinea_aerophila
ASV_1663	0	0	0	2	2	1	4	20	12	48	17	16	3	5	5	2	0	0	0	0	0	0	0	0	0	0	0	0	137		Bacteria	Candidatus_Saccharibacteria	Unassigned	Unassigned	Unassigned	Saccharibacteria_genera_incertae_sedis	Unassigned
ASV_3381	3	0	5	2	10	4	3	29	5	10	31	21	7	4	1	1	0	1	0	0	0	0	0	0	0	0	0	0	137		Bacteria	Unassigned	Unassigned	Unassigned	Unassigned	Unassigned	Unassigned
ASV_958	0	6	0	3	11	6	8	25	15	2	18	9	0	2	10	1	1	0	19	0	0	0	0	0	0	0	0	0	136		Bacteria	Unassigned	Unassigned	Unassigned	Unassigned	Unassigned	Unassigned
ASV_1957	0	0	43	0	0	0	0	0	8	5	0	4	32	2	0	25	1	0	0	1	1	1	4	5	0	1	1	2	136		Bacteria	Proteobacteria	Betaproteobacteria	Burkholderiales	Comamonadaceae	Unassigned	Unassigned
ASV_729	0	1	0	0	0	127	2	0	0	3	0	1	0	1	0	0	0	0	0	0	0	0	0	0	0	0	0	0	135		Bacteria	Actinobacteria	Actinobacteria	Actinomycetales	Corynebacteriaceae	Corynebacterium	Unassigned
ASV_873	0	0	0	0	5	0	0	0	3	0	2	0	1	2	54	45	22	1	0	0	0	0	0	0	0	0	0	0	135		Bacteria	Proteobacteria	Alphaproteobacteria	Rhizobiales	Unassigned	Unassigned	Unassigned
ASV_1059	11	1	2	6	17	48	1	1	7	9	9	2	3	14	3	1	0	0	0	0	0	0	0	0	0	0	0	0	135		Bacteria	Bacteroidetes	Sphingobacteriia	Sphingobacteriales	Sphingobacteriaceae	Pedobacter	Pedobacter_luteus
ASV_1094	0	0	0	5	3	10	5	13	9	5	35	31	3	13	3	0	0	0	0	0	0	0	0	0	0	0	0	0	135		Bacteria	Planctomycetes	Planctomycetia	Planctomycetales	Planctomycetaceae	Unassigned	Unassigned
ASV_1662	2	3	0	5	11	10	72	0	14	0	4	9	0	3	0	2	0	0	0	0	0	0	0	0	0	0	0	0	135		Bacteria	Acidobacteria	Acidobacteria_Gp6	Unassigned	Unassigned	Gp6	Unassigned
ASV_1691	1	0	0	0	3	1	7	28	9	2	22	21	12	13	0	5	9	0	0	0	1	1	0	0	0	0	0	0	135		Bacteria	Acidobacteria	Acidobacteria_Gp17	Unassigned	Unassigned	Gp17	Unassigned
ASV_801	0	0	0	0	0	0	0	0	0	0	0	0	0	0	0	0	4	0	3	5	24	0	23	46	7	3	12	7	134		Bacteria	Actinobacteria	Actinobacteria	Actinomycetales	Unassigned	Unassigned	Unassigned
ASV_840	1	7	0	4	8	12	4	17	17	0	14	13	0	2	7	1	1	0	26	0	0	0	0	0	0	0	0	0	134		Bacteria	Unassigned	Unassigned	Unassigned	Unassigned	Unassigned	Unassigned
ASV_948	0	0	0	12	3	8	5	0	12	11	39	21	7	12	1	3	0	0	0	0	0	0	0	0	0	0	0	0	134		Bacteria	Acidobacteria	Acidobacteria_Gp4	Unassigned	Unassigned	Aridibacter	Aridibacter_famidurans
ASV_1013	2	0	2	2	4	4	0	0	2	65	4	3	3	6	16	7	7	0	1	0	0	1	0	0	1	1	1	2	134		Bacteria	Proteobacteria	Alphaproteobacteria	Rhizobiales	Unassigned	Unassigned	Unassigned
ASV_1051	0	0	0	10	2	1	3	86	7	1	6	11	4	1	1	1	0	0	0	0	0	0	0	0	0	0	0	0	134		Bacteria	Unassigned	Unassigned	Unassigned	Unassigned	Unassigned	Unassigned
ASV_1546	1	10	0	6	25	17	16	1	20	0	3	11	0	7	5	12	0	0	0	0	0	0	0	0	0	0	0	0	134		Bacteria	Acidobacteria	Acidobacteria_Gp6	Unassigned	Unassigned	Gp6	Unassigned
ASV_1887	0	0	2	12	2	14	2	37	5	2	17	17	7	4	11	0	1	1	0	0	0	0	0	0	0	0	0	0	134		Bacteria	Candidatus_Saccharibacteria	Unassigned	Unassigned	Unassigned	Saccharibacteria_genera_incertae_sedis	Unassigned
ASV_1965	0	0	0	12	13	23	31	0	12	0	13	6	3	9	0	12	0	0	0	0	0	0	0	0	0	0	0	0	134		Bacteria	Acidobacteria	Acidobacteria_Gp6	Unassigned	Unassigned	Gp6	Unassigned
ASV_3863	4	0	23	3	2	3	1	2	11	43	5	3	9	3	1	12	4	0	3	0	0	2	0	0	0	0	0	0	134		Bacteria	Proteobacteria	Alphaproteobacteria	Rhodobacterales	Rhodobacteraceae	Rhodobacter	Unassigned
ASV_4567	0	0	6	0	0	0	0	0	0	0	0	0	0	0	0	0	1	0	1	2	1	3	1	101	7	2	1	8	134		Bacteria	Actinobacteria	Actinobacteria	Actinomycetales	Microbacteriaceae	Unassigned	Unassigned
ASV_5014	50	3	0	10	4	8	2	0	1	11	4	1	2	8	25	4	1	0	0	0	0	0	0	0	0	0	0	0	134		Bacteria	Proteobacteria	Alphaproteobacteria	Sphingomonadales	Sphingomonadaceae	Sphingomonas	Unassigned
ASV_5983	0	0	0	1	6	1	78	0	11	0	8	10	7	3	3	6	0	0	0	0	0	0	0	0	0	0	0	0	134		Bacteria	Latescibacteria	Unassigned	Unassigned	Unassigned	Latescibacteria_genera_incertae_sedis	Unassigned
ASV_712	0	0	0	0	0	0	0	0	0	0	0	0	0	0	0	0	3	22	7	8	4	2	11	5	13	33	18	7	133		Bacteria	Verrucomicrobia	Spartobacteria	Unassigned	Unassigned	Spartobacteria_genera_incertae_sedis	Unassigned
ASV_828	13	2	0	16	28	36	12	0	1	0	7	0	0	4	14	0	0	0	0	0	0	0	0	0	0	0	0	0	133		Bacteria	Bacteroidetes	Sphingobacteriia	Sphingobacteriales	Chitinophagaceae	Ferruginibacter	Ferruginibacter_yonginensis
ASV_2032	0	0	0	36	4	7	2	11	12	4	24	13	4	4	10	1	0	0	1	0	0	0	0	0	0	0	0	0	133		Bacteria	Chloroflexi	Thermomicrobia	Unassigned	Unassigned	Unassigned	Unassigned
ASV_5352	1	0	0	19	7	5	11	3	12	4	16	21	5	12	10	7	0	0	0	0	0	0	0	0	0	0	0	0	133		Bacteria	candidate_division_WPS-1	Unassigned	Unassigned	Unassigned	WPS-1_genera_incertae_sedis	Unassigned
ASV_787	0	2	0	5	17	30	26	1	16	0	8	13	3	7	2	1	0	1	0	0	0	0	0	0	0	0	0	0	132		Bacteria	Acidobacteria	Acidobacteria_Gp6	Unassigned	Unassigned	Gp6	Unassigned
ASV_1033	0	31	0	15	4	3	7	0	16	4	15	5	17	7	2	6	0	0	0	0	0	0	0	0	0	0	0	0	132		Bacteria	Actinobacteria	Actinobacteria	Unassigned	Unassigned	Unassigned	Unassigned
ASV_1184	1	0	0	12	8	18	1	0	7	10	25	26	5	10	3	6	0	0	0	0	0	0	0	0	0	0	0	0	132		Bacteria	Planctomycetes	Planctomycetia	Planctomycetales	Planctomycetaceae	Unassigned	Unassigned
ASV_1733	0	4	0	2	32	5	13	10	18	0	10	12	3	3	11	7	2	0	0	0	0	0	0	0	0	0	0	0	132		Bacteria	Acidobacteria	Acidobacteria_Gp6	Unassigned	Unassigned	Gp6	Unassigned
ASV_1876	0	0	0	16	9	13	33	1	20	2	15	7	4	5	3	4	0	0	0	0	0	0	0	0	0	0	0	0	132		Bacteria	Verrucomicrobia	Spartobacteria	Unassigned	Unassigned	Spartobacteria_genera_incertae_sedis	Unassigned
ASV_3755	0	0	0	9	5	15	3	0	7	0	2	18	5	8	6	53	0	1	0	0	0	0	0	0	0	0	0	0	132		Bacteria	Acidobacteria	Acidobacteria_Gp6	Unassigned	Unassigned	Gp6	Unassigned
ASV_4715	12	0	0	19	24	4	13	0	8	4	9	2	2	14	18	3	0	0	0	0	0	0	0	0	0	0	0	0	132		Bacteria	Proteobacteria	Alphaproteobacteria	Sphingomonadales	Sphingomonadaceae	Sphingomonas	Sphingomonas_daechungensis
ASV_808	0	59	0	9	3	30	4	1	4	1	2	7	3	2	1	3	1	0	1	0	0	0	0	0	0	0	0	0	131		Bacteria	Parcubacteria	Unassigned	Unassigned	Unassigned	Parcubacteria_genera_incertae_sedis	Unassigned
ASV_814	1	0	3	1	20	20	3	14	4	7	17	21	1	10	2	1	1	1	1	1	0	2	0	0	0	0	0	0	131		Bacteria	Candidatus_Saccharibacteria	Unassigned	Unassigned	Unassigned	Saccharibacteria_genera_incertae_sedis	Unassigned
ASV_819	75	0	0	0	0	12	3	0	0	1	3	0	0	19	17	0	1	0	0	0	0	0	0	0	0	0	0	0	131		Bacteria	Bacteroidetes	Flavobacteriia	Flavobacteriales	Flavobacteriaceae	Chryseobacterium	Unassigned
ASV_890	2	12	0	0	1	0	0	0	0	3	1	3	0	2	0	0	0	0	0	1	0	0	2	24	80	0	0	0	131		Bacteria	Actinobacteria	Actinobacteria	Actinomycetales	Streptomycetaceae	Streptomyces	Unassigned
ASV_904	0	0	0	1	0	0	0	0	0	0	0	0	0	0	0	1	21	25	18	1	9	9	1	1	3	6	12	23	131		Bacteria	Planctomycetes	Planctomycetia	Planctomycetales	Planctomycetaceae	Pirellula	Pirellula_staleyi
ASV_898	61	0	0	3	0	2	0	1	0	11	1	1	0	16	34	0	0	0	0	0	0	0	0	1	0	0	0	0	131		Bacteria	Actinobacteria	Actinobacteria	Actinomycetales	Micrococcaceae	Arthrobacter	Unassigned
ASV_1035	2	16	0	38	7	48	4	1	2	0	2	9	0	2	0	0	0	0	0	0	0	0	0	0	0	0	0	0	131		Bacteria	Candidatus_Saccharibacteria	Unassigned	Unassigned	Unassigned	Saccharibacteria_genera_incertae_sedis	Unassigned
ASV_1590	0	5	0	12	20	7	50	1	9	0	8	9	2	3	2	3	0	0	0	0	0	0	0	0	0	0	0	0	131		Bacteria	Acidobacteria	Acidobacteria_Gp6	Unassigned	Unassigned	Gp6	Unassigned
ASV_2509	1	0	0	12	7	13	15	7	17	2	11	12	3	18	2	10	0	0	0	0	0	0	0	0	0	0	1	0	131		Bacteria	Acidobacteria	Acidobacteria_Gp4	Unassigned	Unassigned	Aridibacter	Aridibacter_famidurans
ASV_2720	1	9	16	3	2	14	4	16	12	8	12	21	6	5	0	1	1	0	0	0	0	0	0	0	0	0	0	0	131		Bacteria	Parcubacteria	Unassigned	Unassigned	Unassigned	Parcubacteria_genera_incertae_sedis	Unassigned
ASV_778	0	0	38	0	0	0	0	0	2	5	0	0	6	1	0	35	5	1	4	2	1	2	2	12	1	2	3	8	130		Bacteria	Proteobacteria	Betaproteobacteria	Burkholderiales	Burkholderiaceae	Polynucleobacter	Polynucleobacter_difficilis
ASV_1008	0	0	0	0	2	1	88	0	4	0	7	9	3	11	1	4	0	0	0	0	0	0	0	0	0	0	0	0	130		Bacteria	Acidobacteria	Acidobacteria_Gp7	Unassigned	Unassigned	Gp7	Unassigned
ASV_1299	0	2	1	2	3	0	2	38	6	2	16	15	6	15	13	1	7	0	1	0	0	0	0	0	0	0	0	0	130		Bacteria	Unassigned	Unassigned	Unassigned	Unassigned	Unassigned	Unassigned
ASV_2334	2	0	0	1	0	27	0	0	1	62	1	2	1	4	25	0	0	0	0	2	0	0	0	0	0	0	1	1	130		Bacteria	Firmicutes	Bacilli	Bacillales	Planococcaceae	Unassigned	Unassigned
ASV_2534	0	0	0	1	2	1	3	109	0	0	4	2	0	2	6	0	0	0	0	0	0	0	0	0	0	0	0	0	130		Bacteria	Candidatus_Saccharibacteria	Unassigned	Unassigned	Unassigned	Saccharibacteria_genera_incertae_sedis	Unassigned
ASV_4713	1	0	0	7	3	5	35	2	9	1	45	9	3	4	1	3	2	0	0	0	0	0	0	0	0	0	0	0	130		Bacteria	Planctomycetes	Planctomycetia	Planctomycetales	Planctomycetaceae	Unassigned	Unassigned
ASV_947	0	0	0	0	0	0	0	0	1	2	0	4	5	5	4	100	4	0	3	0	0	0	0	0	0	0	0	1	129		Bacteria	Bacteroidetes	Cytophagia	Cytophagales	Cyclobacteriaceae	Algoriphagus	Algoriphagus_mannitolivorans
ASV_951	0	0	0	0	1	0	0	0	11	60	18	27	5	6	0	1	0	0	0	0	0	0	0	0	0	0	0	0	129		Bacteria	Candidatus_Saccharibacteria	Unassigned	Unassigned	Unassigned	Saccharibacteria_genera_incertae_sedis	Unassigned
ASV_1007	0	0	0	66	15	12	2	0	6	1	15	5	2	3	1	1	0	0	0	0	0	0	0	0	0	0	0	0	129		Bacteria	Verrucomicrobia	Verrucomicrobiae	Verrucomicrobiales	Verrucomicrobiaceae	Unassigned	Unassigned
ASV_1053	0	0	0	3	3	5	50	3	14	1	14	14	8	9	0	5	0	0	0	0	0	0	0	0	0	0	0	0	129		Bacteria	Acidobacteria	Acidobacteria_Gp17	Unassigned	Unassigned	Gp17	Unassigned
ASV_1265	0	0	92	0	0	0	0	1	0	15	0	0	9	2	0	4	1	1	0	0	0	1	0	3	0	0	0	0	129		Bacteria	Actinobacteria	Actinobacteria	Actinomycetales	Microbacteriaceae	Rhodoluna	Rhodoluna_lacicola
ASV_1652	1	0	0	2	0	5	4	9	1	6	11	7	3	6	2	0	0	0	0	0	0	0	0	0	0	0	72	0	129		Bacteria	Candidatus_Saccharibacteria	Unassigned	Unassigned	Unassigned	Saccharibacteria_genera_incertae_sedis	Unassigned
ASV_1935	50	57	0	0	0	13	0	0	1	0	2	1	5	0	0	0	0	0	0	0	0	0	0	0	0	0	0	0	129		Bacteria	Parcubacteria	Unassigned	Unassigned	Unassigned	Parcubacteria_genera_incertae_sedis	Unassigned
ASV_1964	0	0	0	16	3	4	60	0	9	0	14	10	2	3	1	6	0	1	0	0	0	0	0	0	0	0	0	0	129		Bacteria	Acidobacteria	Acidobacteria_Gp6	Unassigned	Unassigned	Gp6	Unassigned
ASV_2512	0	0	0	2	2	24	30	5	4	0	26	24	2	3	1	5	1	0	0	0	0	0	0	0	0	0	0	0	129		Bacteria	Planctomycetes	Planctomycetia	Planctomycetales	Planctomycetaceae	Unassigned	Unassigned
ASV_758	2	5	0	32	11	10	2	0	10	1	29	16	4	4	0	2	0	0	0	0	0	0	0	0	0	0	0	0	128		Bacteria	Unassigned	Unassigned	Unassigned	Unassigned	Unassigned	Unassigned
ASV_784	0	0	0	0	0	0	0	116	1	1	1	5	3	0	0	1	0	0	0	0	0	0	0	0	0	0	0	0	128		Bacteria	Unassigned	Unassigned	Unassigned	Unassigned	Unassigned	Unassigned
ASV_856	0	0	0	0	11	2	22	0	10	1	23	25	14	15	1	3	1	0	0	0	0	0	0	0	0	0	0	0	128		Bacteria	Acidobacteria	Acidobacteria_Gp7	Unassigned	Unassigned	Gp7	Unassigned
ASV_871	102	7	0	1	0	1	0	1	1	0	1	1	0	5	8	0	0	0	0	0	0	0	0	0	0	0	0	0	128		Bacteria	Proteobacteria	Alphaproteobacteria	Sphingomonadales	Sphingomonadaceae	Sphingomonas	Sphingomonas_faeni
ASV_1005	0	0	0	27	4	4	5	3	13	7	25	12	8	11	0	9	0	0	0	0	0	0	0	0	0	0	0	0	128		Bacteria	Acidobacteria	Acidobacteria_Gp4	Unassigned	Unassigned	Aridibacter	Aridibacter_famidurans
ASV_1127	1	4	0	10	19	19	13	6	24	2	6	9	1	7	2	4	1	0	0	0	0	0	0	0	0	0	0	0	128		Bacteria	Acidobacteria	Acidobacteria_Gp6	Unassigned	Unassigned	Gp6	Unassigned
ASV_1137	0	0	1	1	1	0	0	8	2	19	5	7	5	3	4	13	4	21	15	0	0	2	4	1	2	0	4	6	128		Bacteria	Planctomycetes	Planctomycetia	Planctomycetales	Planctomycetaceae	Unassigned	Unassigned
ASV_2264	4	10	12	7	7	6	2	0	11	4	9	25	4	12	0	0	0	0	0	0	0	15	0	0	0	0	0	0	128		Bacteria	Candidatus_Saccharibacteria	Unassigned	Unassigned	Unassigned	Saccharibacteria_genera_incertae_sedis	Unassigned
ASV_4184	0	0	0	13	4	4	32	1	5	3	13	7	4	3	9	6	7	16	0	0	0	1	0	0	0	0	0	0	128		Bacteria	Chloroflexi	Thermomicrobia	Unassigned	Unassigned	Unassigned	Unassigned
ASV_4485	30	0	0	1	0	0	1	31	0	8	2	0	0	29	26	0	0	0	0	0	0	0	0	0	0	0	0	0	128		Bacteria	Bacteroidetes	Flavobacteriia	Flavobacteriales	Flavobacteriaceae	Chryseobacterium	Chryseobacterium_soli
ASV_847	0	0	0	0	0	1	0	0	13	64	23	17	2	6	0	0	0	1	0	0	0	0	0	0	0	0	0	0	127		Bacteria	Candidatus_Saccharibacteria	Unassigned	Unassigned	Unassigned	Saccharibacteria_genera_incertae_sedis	Unassigned
ASV_848	32	1	0	14	31	15	0	0	2	1	8	0	0	4	19	0	0	0	0	0	0	0	0	0	0	0	0	0	127		Bacteria	Proteobacteria	Alphaproteobacteria	Sphingomonadales	Sphingomonadaceae	Sphingorhabdus	Unassigned
ASV_1101	0	12	0	13	10	11	2	21	4	1	16	3	0	5	29	0	0	0	0	0	0	0	0	0	0	0	0	0	127		Bacteria	Candidatus_Saccharibacteria	Unassigned	Unassigned	Unassigned	Saccharibacteria_genera_incertae_sedis	Unassigned
ASV_1243	2	0	3	10	1	22	3	5	8	24	15	17	11	6	0	0	0	0	0	0	0	0	0	0	0	0	0	0	127		Bacteria	Candidatus_Saccharibacteria	Unassigned	Unassigned	Unassigned	Saccharibacteria_genera_incertae_sedis	Unassigned
ASV_2773	0	0	0	3	2	14	3	11	2	11	13	12	11	9	11	18	0	2	0	0	0	0	1	0	0	0	4	0	127		Bacteria	Planctomycetes	Planctomycetia	Planctomycetales	Planctomycetaceae	Unassigned	Unassigned
ASV_2938	17	21	0	8	20	8	3	0	5	4	8	0	2	16	12	2	1	0	0	0	0	0	0	0	0	0	0	0	127		Bacteria	Proteobacteria	Alphaproteobacteria	Sphingomonadales	Sphingomonadaceae	Unassigned	Unassigned
ASV_776	0	0	0	0	0	0	0	0	0	0	0	0	0	0	126	0	0	0	0	0	0	0	0	0	0	0	0	0	126		Bacteria	Bacteroidetes	Cytophagia	Cytophagales	Cytophagaceae	Hymenobacter	Unassigned
ASV_783	37	14	0	5	1	4	1	0	0	11	15	2	0	27	9	0	0	0	0	0	0	0	0	0	0	0	0	0	126		Bacteria	Bacteroidetes	Cytophagia	Cytophagales	Cytophagaceae	Hymenobacter	Hymenobacter_elongatus
ASV_1382	0	0	0	13	5	5	2	30	5	15	15	22	5	2	2	3	0	2	0	0	0	0	0	0	0	0	0	0	126		Bacteria	Candidatus_Saccharibacteria	Unassigned	Unassigned	Unassigned	Saccharibacteria_genera_incertae_sedis	Unassigned
ASV_1391	5	70	0	0	0	39	5	0	1	0	3	1	1	0	0	1	0	0	0	0	0	0	0	0	0	0	0	0	126		Bacteria	Parcubacteria	Unassigned	Unassigned	Unassigned	Parcubacteria_genera_incertae_sedis	Unassigned
ASV_1510	0	68	0	1	2	29	0	0	8	0	2	3	4	3	0	6	0	0	0	0	0	0	0	0	0	0	0	0	126		Bacteria	Acidobacteria	Acidobacteria_Gp6	Unassigned	Unassigned	Gp6	Unassigned
ASV_1708	1	80	15	0	0	4	0	2	2	1	2	1	17	0	0	1	0	0	0	0	0	0	0	0	0	0	0	0	126		Bacteria	Parcubacteria	Unassigned	Unassigned	Unassigned	Parcubacteria_genera_incertae_sedis	Unassigned
ASV_2027	0	0	0	8	7	27	45	0	5	2	12	11	1	4	3	1	0	0	0	0	0	0	0	0	0	0	0	0	126		Bacteria	Unassigned	Unassigned	Unassigned	Unassigned	Unassigned	Unassigned
ASV_805	0	104	0	0	0	0	0	0	1	1	5	1	0	1	0	0	1	0	0	0	0	11	0	0	0	0	0	0	125		Bacteria	Candidatus_Saccharibacteria	Unassigned	Unassigned	Unassigned	Saccharibacteria_genera_incertae_sedis	Unassigned
ASV_803	17	2	0	5	0	9	0	15	3	43	6	5	5	4	3	5	0	0	0	0	0	0	0	1	0	2	0	0	125		Bacteria	Proteobacteria	Alphaproteobacteria	Rhodobacterales	Rhodobacteraceae	Paracoccus	Paracoccus_haeundaensis
ASV_821	0	0	1	0	0	0	0	0	0	0	0	0	0	0	1	1	0	0	0	0	69	0	4	10	35	0	4	0	125		Bacteria	Proteobacteria	Alphaproteobacteria	Caulobacterales	Caulobacteraceae	Brevundimonas	Brevundimonas_faecalis
ASV_877	0	0	0	33	6	13	8	0	11	7	13	13	3	7	1	9	0	1	0	0	0	0	0	0	0	0	0	0	125		Bacteria	Acidobacteria	Acidobacteria_Gp4	Unassigned	Unassigned	Aridibacter	Aridibacter_famidurans
ASV_995	8	10	0	0	1	4	1	0	0	95	0	0	1	1	2	0	1	1	0	0	0	0	0	0	0	0	0	0	125		Bacteria	Actinobacteria	Actinobacteria	Actinomycetales	Micrococcaceae	Arthrobacter	Arthrobacter_citreus
ASV_1102	11	0	0	1	2	0	0	4	0	5	1	0	0	10	37	2	11	1	0	0	0	0	2	20	1	0	17	0	125		Bacteria	Proteobacteria	Alphaproteobacteria	Caulobacterales	Caulobacteraceae	Asticcacaulis	Unassigned
ASV_1278	0	0	0	12	8	8	16	0	7	1	26	9	3	12	16	5	2	0	0	0	0	0	0	0	0	0	0	0	125		Bacteria	Unassigned	Unassigned	Unassigned	Unassigned	Unassigned	Unassigned
ASV_1283	0	0	0	8	6	1	5	24	17	9	19	16	3	4	4	8	1	0	0	0	0	0	0	0	0	0	0	0	125		Bacteria	Planctomycetes	Unassigned	Unassigned	Unassigned	Unassigned	Unassigned
ASV_1627	0	0	0	2	3	14	4	0	28	4	13	28	3	22	2	2	0	0	0	0	0	0	0	0	0	0	0	0	125		Bacteria	Acidobacteria	Acidobacteria_Gp6	Unassigned	Unassigned	Gp6	Unassigned
ASV_1764	0	0	0	6	1	26	10	15	6	0	28	17	2	6	5	1	0	2	0	0	0	0	0	0	0	0	0	0	125		Bacteria	Candidatus_Saccharibacteria	Unassigned	Unassigned	Unassigned	Saccharibacteria_genera_incertae_sedis	Unassigned
ASV_2061	0	0	0	16	12	3	13	1	21	2	16	15	2	1	18	3	0	2	0	0	0	0	0	0	0	0	0	0	125		Bacteria	Unassigned	Unassigned	Unassigned	Unassigned	Unassigned	Unassigned
ASV_2771	0	0	0	7	6	7	2	10	3	12	25	15	6	4	8	7	8	1	1	0	0	1	0	0	0	0	1	1	125		Bacteria	Planctomycetes	Planctomycetia	Planctomycetales	Planctomycetaceae	Pirellula	Pirellula_staleyi
ASV_3198	0	30	0	18	6	3	11	0	15	0	14	6	0	5	14	3	0	0	0	0	0	0	0	0	0	0	0	0	125		Bacteria	Unassigned	Unassigned	Unassigned	Unassigned	Unassigned	Unassigned
ASV_846	0	0	0	5	12	10	39	0	19	1	11	9	0	7	2	8	0	1	0	0	0	0	0	0	0	0	0	0	124		Bacteria	Acidobacteria	Acidobacteria_Gp4	Unassigned	Unassigned	Gp4	Unassigned
ASV_884	0	13	0	16	55	18	3	0	3	0	4	5	1	2	2	2	0	0	0	0	0	0	0	0	0	0	0	0	124		Bacteria	Proteobacteria	Betaproteobacteria	Methylophilales	Methylophilaceae	Methylotenera	Unassigned
ASV_1017	0	11	0	45	10	17	3	0	9	3	5	9	0	8	4	0	0	0	0	0	0	0	0	0	0	0	0	0	124		Bacteria	Candidatus_Saccharibacteria	Unassigned	Unassigned	Unassigned	Saccharibacteria_genera_incertae_sedis	Unassigned
ASV_1076	1	79	3	0	1	2	0	3	8	8	0	8	4	2	1	2	0	1	1	0	0	0	0	0	0	0	0	0	124		Bacteria	Parcubacteria	Unassigned	Unassigned	Unassigned	Parcubacteria_genera_incertae_sedis	Unassigned
ASV_1208	8	0	0	23	39	18	2	0	4	6	7	5	3	6	3	0	0	0	0	0	0	0	0	0	0	0	0	0	124		Bacteria	Proteobacteria	Alphaproteobacteria	Sphingomonadales	Sphingomonadaceae	Sphingomonas	Sphingomonas_daechungensis
ASV_1529	0	0	0	4	0	3	2	65	6	1	11	12	3	3	0	2	1	0	0	0	0	1	0	0	1	0	9	0	124		Bacteria	Planctomycetes	Planctomycetia	Planctomycetales	Planctomycetaceae	Unassigned	Unassigned
ASV_1716	0	0	0	0	0	0	0	0	0	0	0	0	0	0	0	0	4	1	0	0	0	2	1	97	3	7	3	6	124		Bacteria	Actinobacteria	Actinobacteria	Actinomycetales	Microbacteriaceae	Unassigned	Unassigned
ASV_1725	0	0	4	7	0	1	4	78	3	6	3	9	2	1	0	0	5	1	0	0	0	0	0	0	0	0	0	0	124		Bacteria	Candidatus_Saccharibacteria	Unassigned	Unassigned	Unassigned	Saccharibacteria_genera_incertae_sedis	Unassigned
ASV_2805	3	0	0	18	13	52	5	1	7	0	8	4	1	8	4	0	0	0	0	0	0	0	0	0	0	0	0	0	124		Bacteria	Candidatus_Saccharibacteria	Unassigned	Unassigned	Unassigned	Saccharibacteria_genera_incertae_sedis	Unassigned
ASV_817	0	0	67	0	0	0	0	0	1	32	0	2	14	0	0	6	1	0	0	0	0	0	0	0	0	0	0	0	123		Bacteria	Proteobacteria	Betaproteobacteria	Burkholderiales	Burkholderiaceae	Polynucleobacter	Polynucleobacter_necessarius_subsp._asymbioticus
ASV_822	0	7	0	16	11	4	6	3	5	1	22	11	1	12	20	2	2	0	0	0	0	0	0	0	0	0	0	0	123		Bacteria	Actinobacteria	Actinobacteria	Unassigned	Unassigned	Unassigned	Unassigned
ASV_855	0	0	0	2	0	4	0	98	5	0	4	4	2	1	0	1	2	0	0	0	0	0	0	0	0	0	0	0	123		Bacteria	Chloroflexi	Caldilineae	Caldilineales	Caldilineaceae	Caldilinea	Caldilinea_tarbellica
ASV_1050	0	0	0	11	2	16	21	1	3	3	29	22	3	4	2	6	0	0	0	0	0	0	0	0	0	0	0	0	123		Bacteria	Planctomycetes	Planctomycetia	Planctomycetales	Planctomycetaceae	Unassigned	Unassigned
ASV_1338	0	0	0	1	0	0	1	5	8	42	20	19	2	8	2	6	3	1	1	0	0	0	0	0	0	0	4	0	123		Bacteria	Planctomycetes	Planctomycetia	Planctomycetales	Planctomycetaceae	Pirellula	Pirellula_staleyi
ASV_1470	1	11	0	4	13	9	8	6	27	0	10	21	0	8	3	2	0	0	0	0	0	0	0	0	0	0	0	0	123		Bacteria	Acidobacteria	Acidobacteria_Gp6	Unassigned	Unassigned	Gp6	Unassigned
ASV_1739	0	5	0	4	12	7	19	3	13	0	24	12	1	12	4	5	2	0	0	0	0	0	0	0	0	0	0	0	123		Bacteria	Actinobacteria	Actinobacteria	Unassigned	Unassigned	Unassigned	Unassigned
ASV_2259	0	2	0	16	4	11	28	0	17	1	21	5	3	3	3	4	5	0	0	0	0	0	0	0	0	0	0	0	123		Bacteria	Chloroflexi	Thermomicrobia	Unassigned	Unassigned	Unassigned	Unassigned
ASV_976	68	0	0	2	1	2	0	1	0	14	0	0	0	15	18	1	0	0	0	0	0	0	0	0	0	0	0	0	122		Bacteria	Actinobacteria	Actinobacteria	Actinomycetales	Micrococcaceae	Arthrobacter	Unassigned
ASV_1144	0	11	0	20	9	7	15	2	10	1	12	12	12	8	0	3	0	0	0	0	0	0	0	0	0	0	0	0	122		Bacteria	Acidobacteria	Acidobacteria_Gp6	Unassigned	Unassigned	Gp6	Unassigned
ASV_1371	0	55	0	10	6	1	4	6	4	5	10	7	5	0	0	8	0	0	0	0	0	0	0	0	0	0	1	0	122		Bacteria	Acidobacteria	Acidobacteria_Gp4	Unassigned	Unassigned	Aridibacter	Aridibacter_famidurans
ASV_1759	6	2	0	32	44	16	2	1	3	4	4	5	0	3	0	0	0	0	0	0	0	0	0	0	0	0	0	0	122		Bacteria	Bacteroidetes	Sphingobacteriia	Sphingobacteriales	Chitinophagaceae	Unassigned	Unassigned
ASV_1968	1	20	0	9	22	37	0	0	12	1	1	2	2	1	9	4	0	0	0	1	0	0	0	0	0	0	0	0	122		Bacteria	Deinococcus-Thermus	Deinococci	Deinococcales	Trueperaceae	Truepera	Truepera_radiovictrix
ASV_2070	0	0	0	4	0	7	15	42	5	0	25	7	7	3	1	3	0	1	0	0	0	0	0	0	0	0	2	0	122		Bacteria	Planctomycetes	Planctomycetia	Planctomycetales	Planctomycetaceae	Blastopirellula	Unassigned
ASV_2968	0	0	0	7	8	29	21	1	10	3	14	12	4	3	2	3	3	0	1	0	0	0	0	0	0	0	0	1	122		Bacteria	Planctomycetes	Planctomycetia	Planctomycetales	Planctomycetaceae	Unassigned	Unassigned
ASV_3768	74	11	1	0	0	12	2	0	1	2	2	2	13	0	2	0	0	0	0	0	0	0	0	0	0	0	0	0	122		Bacteria	Parcubacteria	Unassigned	Unassigned	Unassigned	Parcubacteria_genera_incertae_sedis	Unassigned
ASV_5258	37	5	2	4	9	10	7	17	2	2	12	1	0	7	5	0	1	0	1	0	0	0	0	0	0	0	0	0	122		Bacteria	Verrucomicrobia	Verrucomicrobiae	Verrucomicrobiales	Verrucomicrobiaceae	Luteolibacter	Unassigned
ASV_5399	71	35	0	0	0	8	0	1	0	2	1	0	3	1	0	0	0	0	0	0	0	0	0	0	0	0	0	0	122		Bacteria	Parcubacteria	Unassigned	Unassigned	Unassigned	Parcubacteria_genera_incertae_sedis	Unassigned
ASV_865	0	0	20	0	0	0	0	0	0	25	0	4	24	3	0	40	4	1	0	0	0	0	0	0	0	0	0	0	121		Bacteria	Actinobacteria	Actinobacteria	Actinomycetales	Unassigned	Unassigned	Unassigned
ASV_874	0	0	0	0	0	0	0	0	1	0	0	0	0	1	7	0	3	0	1	1	19	19	0	0	0	0	18	51	121		Bacteria	Firmicutes	Bacilli	Bacillales	Planococcaceae	Paenisporosarcina	Paenisporosarcina_antarctica
ASV_888	89	17	2	0	0	1	0	0	0	8	0	0	1	1	0	1	0	0	0	0	0	0	0	1	0	0	0	0	121		Bacteria	Actinobacteria	Actinobacteria	Actinomycetales	Microbacteriaceae	Yonghaparkia	Yonghaparkia_alkaliphila
ASV_934	0	13	0	16	3	21	12	1	8	2	17	10	7	8	2	1	0	0	0	0	0	0	0	0	0	0	0	0	121		Bacteria	Actinobacteria	Actinobacteria	Unassigned	Unassigned	Unassigned	Unassigned
ASV_979	23	0	5	0	0	0	1	0	2	2	0	0	0	6	57	23	1	1	0	0	0	0	0	0	0	0	0	0	121		Bacteria	Proteobacteria	Alphaproteobacteria	Sphingomonadales	Sphingomonadaceae	Sphingorhabdus	Sphingorhabdus_wooponensis
ASV_994	0	0	0	1	0	1	1	70	0	2	7	18	7	6	0	2	5	1	0	0	0	0	0	0	0	0	0	0	121		Bacteria	Unassigned	Unassigned	Unassigned	Unassigned	Unassigned	Unassigned
ASV_1421	39	51	1	0	1	5	0	0	1	1	2	1	15	2	1	1	0	0	0	0	0	0	0	0	0	0	0	0	121		Bacteria	Parcubacteria	Unassigned	Unassigned	Unassigned	Parcubacteria_genera_incertae_sedis	Unassigned
ASV_1631	0	0	0	3	6	4	49	3	13	3	11	7	3	12	1	6	0	0	0	0	0	0	0	0	0	0	0	0	121		Bacteria	Acidobacteria	Acidobacteria_Gp6	Unassigned	Unassigned	Gp6	Unassigned
ASV_2147	0	0	0	5	11	20	5	1	37	1	8	22	3	5	1	2	0	0	0	0	0	0	0	0	0	0	0	0	121		Bacteria	Acidobacteria	Acidobacteria_Gp6	Unassigned	Unassigned	Gp6	Unassigned
ASV_2266	0	14	0	30	18	1	4	0	7	0	21	8	7	4	1	6	0	0	0	0	0	0	0	0	0	0	0	0	121		Bacteria	Verrucomicrobia	Verrucomicrobiae	Verrucomicrobiales	Verrucomicrobiaceae	Unassigned	Unassigned
ASV_747	0	0	0	0	0	0	0	0	0	0	0	0	0	2	4	4	4	1	2	2	2	2	3	55	2	17	4	16	120		Bacteria	Proteobacteria	Betaproteobacteria	Burkholderiales	Alcaligenaceae	Unassigned	Unassigned
ASV_927	0	38	0	44	1	6	3	0	1	11	6	4	0	5	0	1	0	0	0	0	0	0	0	0	0	0	0	0	120		Bacteria	Unassigned	Unassigned	Unassigned	Unassigned	Unassigned	Unassigned
ASV_946	0	0	20	0	0	0	0	0	0	0	0	0	0	0	0	3	4	0	1	0	1	2	1	66	9	5	2	6	120		Bacteria	Actinobacteria	Actinobacteria	Actinomycetales	Microbacteriaceae	Unassigned	Unassigned
ASV_1087	10	0	5	0	0	4	1	1	0	3	1	0	3	2	5	2	0	0	75	0	0	1	0	5	0	0	2	0	120		Bacteria	Actinobacteria	Actinobacteria	Actinomycetales	Nocardioidaceae	Aeromicrobium	Aeromicrobium_marinum
ASV_1098	1	0	0	1	0	0	1	97	0	5	6	5	3	1	0	0	0	0	0	0	0	0	0	0	0	0	0	0	120		Bacteria	Candidatus_Saccharibacteria	Unassigned	Unassigned	Unassigned	Saccharibacteria_genera_incertae_sedis	Unassigned
ASV_1105	0	0	0	0	0	0	0	0	0	0	0	0	0	0	0	0	20	13	27	4	9	12	6	2	2	3	7	15	120		Bacteria	Planctomycetes	Planctomycetia	Planctomycetales	Planctomycetaceae	Unassigned	Unassigned
ASV_1514	0	0	0	9	4	24	8	14	14	4	15	11	3	10	0	4	0	0	0	0	0	0	0	0	0	0	0	0	120		Bacteria	Acidobacteria	Acidobacteria_Gp4	Unassigned	Unassigned	Aridibacter	Aridibacter_famidurans
ASV_1747	0	0	0	23	3	0	13	27	9	0	6	11	5	10	0	13	0	0	0	0	0	0	0	0	0	0	0	0	120		Bacteria	Acidobacteria	Acidobacteria_Gp6	Unassigned	Unassigned	Gp6	Unassigned
ASV_2331	0	0	0	19	9	3	10	3	9	0	16	16	10	14	1	10	0	0	0	0	0	0	0	0	0	0	0	0	120		Bacteria	Acidobacteria	Acidobacteria_Gp6	Unassigned	Unassigned	Gp6	Unassigned
ASV_2701	1	8	23	1	4	1	0	10	27	15	13	14	2	1	0	0	0	0	0	0	0	0	0	0	0	0	0	0	120		Bacteria	Candidatus_Saccharibacteria	Unassigned	Unassigned	Unassigned	Saccharibacteria_genera_incertae_sedis	Unassigned
ASV_2770	0	0	0	20	12	6	16	1	14	3	16	9	3	7	4	8	0	1	0	0	0	0	0	0	0	0	0	0	120		Bacteria	Acidobacteria	Acidobacteria_Gp6	Unassigned	Unassigned	Gp6	Unassigned
ASV_754	0	0	0	0	0	0	0	0	0	0	0	1	0	0	0	0	7	27	23	5	3	15	6	0	1	0	10	21	119		Bacteria	Planctomycetes	Planctomycetia	Planctomycetales	Planctomycetaceae	Planctopirus	Planctopirus_limnophila
ASV_862	0	0	41	0	0	2	0	0	1	4	0	1	1	0	0	23	7	2	2	2	2	1	2	13	6	3	2	4	119		Bacteria	Proteobacteria	Betaproteobacteria	Burkholderiales	Burkholderiaceae	Polynucleobacter	Polynucleobacter_difficilis
ASV_903	0	0	1	0	0	1	0	0	0	0	0	0	0	0	0	0	0	1	0	0	54	1	0	20	39	0	2	0	119		Bacteria	Proteobacteria	Alphaproteobacteria	Caulobacterales	Caulobacteraceae	Brevundimonas	Brevundimonas_faecalis
ASV_959	38	1	0	7	11	40	1	0	2	0	6	1	0	6	6	0	0	0	0	0	0	0	0	0	0	0	0	0	119		Bacteria	Proteobacteria	Alphaproteobacteria	Sphingomonadales	Sphingomonadaceae	Sphingorhabdus	Sphingorhabdus_planktonica
ASV_1113	0	0	0	0	0	1	0	5	1	70	11	0	23	6	0	0	1	0	0	0	0	0	0	0	0	0	1	0	119		Bacteria	Verrucomicrobia	Verrucomicrobiae	Verrucomicrobiales	Verrucomicrobiaceae	Luteolibacter	Unassigned
ASV_3499	0	0	0	19	14	0	25	1	9	1	7	22	4	9	0	8	0	0	0	0	0	0	0	0	0	0	0	0	119		Bacteria	Acidobacteria	Acidobacteria_Gp6	Unassigned	Unassigned	Gp6	Unassigned
ASV_4929	0	0	0	19	6	0	3	10	23	4	13	25	3	12	1	0	0	0	0	0	0	0	0	0	0	0	0	0	119		Bacteria	Acidobacteria	Acidobacteria_Gp6	Unassigned	Unassigned	Gp6	Unassigned
ASV_5029	0	18	0	5	4	8	29	0	4	3	17	9	5	14	2	1	0	0	0	0	0	0	0	0	0	0	0	0	119		Bacteria	Actinobacteria	Actinobacteria	Coriobacteriales	Coriobacteriaceae	Unassigned	Unassigned
ASV_870	0	33	0	3	3	18	5	17	1	3	14	14	6	1	0	0	0	0	0	0	0	0	0	0	0	0	0	0	118		Bacteria	Candidatus_Saccharibacteria	Unassigned	Unassigned	Unassigned	Saccharibacteria_genera_incertae_sedis	Unassigned
ASV_908	1	0	0	58	2	30	0	0	0	8	8	3	1	5	2	0	0	0	0	0	0	0	0	0	0	0	0	0	118		Bacteria	Deinococcus-Thermus	Deinococci	Deinococcales	Deinococcaceae	Deinococcus	Deinococcus_aquatilis
ASV_928	74	4	0	2	0	1	1	0	0	3	3	1	0	20	8	0	0	0	0	1	0	0	0	0	0	0	0	0	118		Bacteria	Proteobacteria	Alphaproteobacteria	Caulobacterales	Caulobacteraceae	Unassigned	Unassigned
ASV_974	1	0	0	0	0	102	0	0	0	13	1	0	0	0	0	1	0	0	0	0	0	0	0	0	0	0	0	0	118		Bacteria	Firmicutes	Bacilli	Bacillales	Unassigned	Unassigned	Unassigned
ASV_1086	19	0	0	0	0	7	0	3	0	23	4	0	2	6	2	0	11	0	0	0	6	0	0	8	9	3	0	15	118		Bacteria	Proteobacteria	Alphaproteobacteria	Sphingomonadales	Sphingomonadaceae	Blastomonas	Blastomonas_aquatica
ASV_1091	0	0	0	1	20	2	9	0	24	2	19	17	7	9	0	8	0	0	0	0	0	0	0	0	0	0	0	0	118		Bacteria	Verrucomicrobia	Verrucomicrobiae	Verrucomicrobiales	Verrucomicrobiaceae	Luteolibacter	Unassigned
ASV_1653	3	1	0	5	14	4	14	1	2	4	22	4	24	2	1	9	3	0	1	0	0	0	0	1	0	0	1	2	118		Bacteria	Verrucomicrobia	Verrucomicrobiae	Verrucomicrobiales	Verrucomicrobiaceae	Luteolibacter	Luteolibacter_pohnpeiensis
ASV_1654	0	0	0	4	3	28	20	0	3	3	14	13	6	11	0	11	2	0	0	0	0	0	0	0	0	0	0	0	118		Bacteria	Unassigned	Unassigned	Unassigned	Unassigned	Unassigned	Unassigned
ASV_2364	9	0	0	23	2	55	2	0	7	1	9	2	1	5	2	0	0	0	0	0	0	0	0	0	0	0	0	0	118		Bacteria	Candidatus_Saccharibacteria	Unassigned	Unassigned	Unassigned	Saccharibacteria_genera_incertae_sedis	Unassigned
ASV_3057	1	0	0	11	32	1	37	0	19	0	3	4	0	4	5	1	0	0	0	0	0	0	0	0	0	0	0	0	118		Archaea	Thaumarchaeota	Unassigned	Nitrososphaerales	Nitrososphaeraceae	Nitrososphaera	Unassigned
ASV_984	0	5	0	20	10	15	1	2	18	1	19	10	3	7	0	2	0	0	0	0	0	0	0	0	0	0	4	0	117		Bacteria	Chloroflexi	Caldilineae	Caldilineales	Caldilineaceae	Litorilinea	Litorilinea_aerophila
ASV_1109	0	0	0	17	5	10	3	1	14	4	27	15	5	15	0	1	0	0	0	0	0	0	0	0	0	0	0	0	117		Bacteria	Actinobacteria	Actinobacteria	Unassigned	Unassigned	Unassigned	Unassigned
ASV_1159	2	0	0	13	26	4	5	0	7	2	11	16	1	14	5	10	0	1	0	0	0	0	0	0	0	0	0	0	117		Bacteria	Verrucomicrobia	Verrucomicrobiae	Verrucomicrobiales	Verrucomicrobiaceae	Luteolibacter	Luteolibacter_yonseiensis
ASV_1245	1	0	2	0	7	11	3	53	5	7	9	13	2	2	2	0	0	0	0	0	0	0	0	0	0	0	0	0	117		Bacteria	Candidatus_Saccharibacteria	Unassigned	Unassigned	Unassigned	Saccharibacteria_genera_incertae_sedis	Unassigned
ASV_1577	0	0	90	0	0	0	0	0	0	0	2	3	2	0	0	1	0	0	6	5	0	0	8	0	0	0	0	0	117		Bacteria	Unassigned	Unassigned	Unassigned	Unassigned	Unassigned	Unassigned
ASV_867	0	80	9	0	0	0	0	7	2	5	6	3	2	1	0	1	0	0	0	0	0	0	0	0	0	0	0	0	116		Bacteria	Parcubacteria	Unassigned	Unassigned	Unassigned	Parcubacteria_genera_incertae_sedis	Unassigned
ASV_907	11	1	0	6	5	4	1	0	0	4	11	0	0	24	41	0	0	3	0	0	1	0	0	3	1	0	0	0	116		Bacteria	Proteobacteria	Alphaproteobacteria	Caulobacterales	Caulobacteraceae	Brevundimonas	Unassigned
ASV_920	0	0	0	0	0	0	0	18	2	17	14	38	13	12	0	2	0	0	0	0	0	0	0	0	0	0	0	0	116		Bacteria	Verrucomicrobia	Verrucomicrobiae	Verrucomicrobiales	Verrucomicrobiaceae	Unassigned	Unassigned
ASV_985	0	73	0	0	2	9	0	0	2	8	0	4	1	1	2	0	4	0	2	1	1	0	0	6	0	0	0	0	116		Bacteria	Proteobacteria	Alphaproteobacteria	Rhizobiales	Phyllobacteriaceae	Mesorhizobium	Mesorhizobium_alhagi
ASV_1014	0	0	0	10	7	18	2	0	11	1	29	23	5	9	1	0	0	0	0	0	0	0	0	0	0	0	0	0	116		Bacteria	Verrucomicrobia	Spartobacteria	Unassigned	Unassigned	Spartobacteria_genera_incertae_sedis	Unassigned
ASV_1178	0	0	0	0	0	1	5	58	2	0	2	7	3	3	0	11	20	1	1	0	0	0	0	0	1	0	1	0	116		Bacteria	Acidobacteria	Acidobacteria_Gp17	Unassigned	Unassigned	Gp17	Unassigned
ASV_1182	0	5	0	20	22	3	7	0	33	1	14	7	0	2	0	2	0	0	0	0	0	0	0	0	0	0	0	0	116		Archaea	Thaumarchaeota	Unassigned	Nitrososphaerales	Nitrososphaeraceae	Nitrososphaera	Unassigned
ASV_1225	0	9	0	4	0	1	4	7	29	3	18	8	21	3	0	5	2	0	2	0	0	0	0	0	0	0	0	0	116		Bacteria	Acidobacteria	Acidobacteria_Gp7	Unassigned	Unassigned	Gp7	Unassigned
ASV_3095	0	0	0	19	5	7	19	2	3	3	22	22	1	5	2	3	0	0	0	0	1	0	0	0	0	0	0	2	116		Bacteria	Planctomycetes	Planctomycetia	Planctomycetales	Planctomycetaceae	Blastopirellula	Unassigned
ASV_1110	0	12	0	6	7	7	27	0	11	0	22	8	0	6	8	1	0	0	0	0	0	0	0	0	0	0	0	0	115		Bacteria	Unassigned	Unassigned	Unassigned	Unassigned	Unassigned	Unassigned
ASV_1328	0	0	0	9	2	26	8	20	4	1	13	15	2	11	1	3	0	0	0	0	0	0	0	0	0	0	0	0	115		Bacteria	Planctomycetes	Planctomycetia	Planctomycetales	Planctomycetaceae	Unassigned	Unassigned
ASV_1516	0	0	0	12	2	10	2	3	6	2	36	18	6	17	0	1	0	0	0	0	0	0	0	0	0	0	0	0	115		Bacteria	Actinobacteria	Actinobacteria	Coriobacteriales	Coriobacteriaceae	Unassigned	Unassigned
ASV_2206	0	0	0	9	6	9	35	1	13	1	17	8	4	8	1	3	0	0	0	0	0	0	0	0	0	0	0	0	115		Bacteria	Acidobacteria	Acidobacteria_Gp6	Unassigned	Unassigned	Gp6	Unassigned
ASV_3378	43	17	1	2	4	6	0	3	2	18	1	1	6	3	1	3	1	1	1	0	0	0	0	0	0	0	1	0	115		Bacteria	Actinobacteria	Actinobacteria	Actinomycetales	Microbacteriaceae	Unassigned	Unassigned
ASV_3950	2	0	0	8	5	14	17	9	4	1	17	10	7	12	3	2	4	0	0	0	0	0	0	0	0	0	0	0	115		Bacteria	Planctomycetes	Planctomycetia	Planctomycetales	Planctomycetaceae	Unassigned	Unassigned
ASV_793	0	0	1	0	0	1	0	0	0	0	1	1	3	2	0	19	2	0	0	2	23	3	10	9	10	2	7	18	114		Bacteria	Bacteroidetes	Sphingobacteriia	Sphingobacteriales	Chitinophagaceae	Terrimonas	Unassigned
ASV_812	0	0	0	0	0	0	0	0	0	0	0	0	0	0	0	0	114	0	0	0	0	0	0	0	0	0	0	0	114		Bacteria	Candidatus_Saccharibacteria	Unassigned	Unassigned	Unassigned	Saccharibacteria_genera_incertae_sedis	Unassigned
ASV_864	0	0	0	0	0	0	0	0	0	0	0	0	0	0	0	0	2	5	3	4	12	2	6	40	12	11	8	9	114		Bacteria	Actinobacteria	Actinobacteria	Actinomycetales	Unassigned	Unassigned	Unassigned
ASV_866	0	0	0	0	0	0	0	0	0	0	0	0	0	0	0	0	4	2	7	2	3	9	0	25	2	2	8	50	114		Bacteria	Proteobacteria	Alphaproteobacteria	Rhodospirillales	Acetobacteraceae	Roseomonas	Unassigned
ASV_909	0	0	1	1	0	0	0	100	1	7	1	2	1	0	0	0	0	0	0	0	0	0	0	0	0	0	0	0	114		Bacteria	Unassigned	Unassigned	Unassigned	Unassigned	Unassigned	Unassigned
ASV_1081	0	0	0	8	45	1	9	0	44	0	1	2	0	0	4	0	0	0	0	0	0	0	0	0	0	0	0	0	114		Archaea	Thaumarchaeota	Unassigned	Nitrososphaerales	Nitrososphaeraceae	Nitrososphaera	Unassigned
ASV_1142	0	0	4	0	0	1	0	39	3	9	14	21	3	2	2	0	1	0	1	9	0	0	5	0	0	0	0	0	114		Bacteria	Unassigned	Unassigned	Unassigned	Unassigned	Unassigned	Unassigned
ASV_1247	18	13	0	21	19	21	1	0	1	6	2	3	1	7	1	0	0	0	0	0	0	0	0	0	0	0	0	0	114		Bacteria	Actinobacteria	Actinobacteria	Actinomycetales	Intrasporangiaceae	Oryzihumus	Oryzihumus_terrae
ASV_1409	0	0	1	0	0	0	0	0	11	16	17	17	8	6	0	38	0	0	0	0	0	0	0	0	0	0	0	0	114		Bacteria	Verrucomicrobia	Verrucomicrobiae	Verrucomicrobiales	Verrucomicrobiaceae	Unassigned	Unassigned
ASV_1750	0	0	0	11	52	14	4	4	6	0	11	2	1	1	6	1	1	0	0	0	0	0	0	0	0	0	0	0	114		Bacteria	Verrucomicrobia	Spartobacteria	Unassigned	Unassigned	Spartobacteria_genera_incertae_sedis	Unassigned
ASV_1748	1	0	0	15	11	7	31	0	5	2	14	11	6	9	0	1	1	0	0	0	0	0	0	0	0	0	0	0	114		Bacteria	Acidobacteria	Acidobacteria_Gp4	Unassigned	Unassigned	Gp4	Unassigned
ASV_2225	76	13	0	0	0	4	0	0	0	14	1	1	0	0	5	0	0	0	0	0	0	0	0	0	0	0	0	0	114		Bacteria	Actinobacteria	Actinobacteria	Actinomycetales	Microbacteriaceae	Unassigned	Unassigned
ASV_2242	0	64	14	2	0	3	0	1	1	2	6	8	1	4	0	2	0	0	6	0	0	0	0	0	0	0	0	0	114		Bacteria	Parcubacteria	Unassigned	Unassigned	Unassigned	Parcubacteria_genera_incertae_sedis	Unassigned
ASV_2370	1	0	3	0	1	2	2	0	2	6	0	0	3	1	0	80	1	0	1	0	0	0	0	6	1	0	1	3	114		Bacteria	Proteobacteria	Betaproteobacteria	Burkholderiales	Comamonadaceae	Unassigned	Unassigned
ASV_2504	0	0	0	6	15	11	16	2	27	0	18	5	6	7	0	1	0	0	0	0	0	0	0	0	0	0	0	0	114		Bacteria	Acidobacteria	Acidobacteria_Gp6	Unassigned	Unassigned	Gp6	Unassigned
ASV_2887	0	0	0	8	5	3	11	10	6	4	17	32	4	7	6	0	0	0	0	0	0	0	0	0	0	1	0	0	114		Bacteria	Planctomycetes	Planctomycetia	Planctomycetales	Planctomycetaceae	Unassigned	Unassigned
ASV_2962	47	0	6	0	0	7	0	45	1	1	4	0	2	0	1	0	0	0	0	0	0	0	0	0	0	0	0	0	114		Bacteria	Bacteroidetes	Sphingobacteriia	Sphingobacteriales	Sphingobacteriaceae	Pedobacter	Unassigned
ASV_3211	14	0	0	23	14	23	1	2	0	5	2	2	1	9	6	10	2	0	0	0	0	0	0	0	0	0	0	0	114		Bacteria	Proteobacteria	Alphaproteobacteria	Sphingomonadales	Sphingomonadaceae	Novosphingobium	Unassigned
ASV_777	0	101	0	0	0	10	1	0	0	0	0	1	0	0	0	0	0	0	0	0	0	0	0	0	0	0	0	0	113		Bacteria	Parcubacteria	Unassigned	Unassigned	Unassigned	Parcubacteria_genera_incertae_sedis	Unassigned
ASV_804	0	0	0	0	0	0	0	0	0	0	0	0	0	0	0	0	1	0	0	98	0	0	0	0	0	0	14	0	113		Bacteria	Parcubacteria	Unassigned	Unassigned	Unassigned	Parcubacteria_genera_incertae_sedis	Unassigned
ASV_936	0	0	108	0	0	0	0	0	0	1	0	4	0	0	0	0	0	0	0	0	0	0	0	0	0	0	0	0	113		Bacteria	Parcubacteria	Unassigned	Unassigned	Unassigned	Parcubacteria_genera_incertae_sedis	Unassigned
ASV_937	0	1	0	0	0	109	1	0	0	1	0	0	0	0	0	1	0	0	0	0	0	0	0	0	0	0	0	0	113		Bacteria	Proteobacteria	Gammaproteobacteria	Pseudomonadales	Moraxellaceae	Acinetobacter	Acinetobacter_beijerinckii
ASV_954	0	15	0	0	0	0	0	0	11	1	1	10	5	0	1	58	7	2	2	0	0	0	0	0	0	0	0	0	113		Bacteria	Verrucomicrobia	Verrucomicrobiae	Verrucomicrobiales	Verrucomicrobiaceae	Prosthecobacter	Prosthecobacter_vanneervenii
ASV_964	0	0	0	10	29	5	12	0	10	1	20	7	1	9	5	3	0	1	0	0	0	0	0	0	0	0	0	0	113		Bacteria	Acidobacteria	Acidobacteria_Gp6	Unassigned	Unassigned	Gp6	Unassigned
ASV_1016	16	18	0	27	8	11	0	2	3	11	5	2	2	7	0	1	0	0	0	0	0	0	0	0	0	0	0	0	113		Bacteria	Actinobacteria	Actinobacteria	Actinomycetales	Intrasporangiaceae	Oryzihumus	Oryzihumus_terrae
ASV_1161	0	9	1	0	2	26	2	0	7	8	11	23	11	2	0	11	0	0	0	0	0	0	0	0	0	0	0	0	113		Bacteria	Parcubacteria	Unassigned	Unassigned	Unassigned	Parcubacteria_genera_incertae_sedis	Unassigned
ASV_1202	0	5	0	11	14	2	1	8	9	0	18	10	3	7	13	8	4	0	0	0	0	0	0	0	0	0	0	0	113		Bacteria	Unassigned	Unassigned	Unassigned	Unassigned	Unassigned	Unassigned
ASV_1380	0	16	0	14	3	10	9	0	8	0	17	18	3	13	0	2	0	0	0	0	0	0	0	0	0	0	0	0	113		Bacteria	Acidobacteria	Acidobacteria_Gp4	Unassigned	Unassigned	Gp4	Unassigned
ASV_1550	0	0	0	1	1	13	8	16	14	15	13	20	4	3	2	1	0	1	0	0	0	1	0	0	0	0	0	0	113		Bacteria	Proteobacteria	Unassigned	Unassigned	Unassigned	Unassigned	Unassigned
ASV_1565	0	0	0	0	1	0	0	7	3	1	2	2	3	5	0	6	2	2	16	0	10	35	2	0	2	1	1	12	113		Bacteria	Verrucomicrobia	Verrucomicrobiae	Verrucomicrobiales	Verrucomicrobiaceae	Unassigned	Unassigned
ASV_1676	20	0	6	0	3	12	1	24	1	6	3	1	2	32	0	1	0	0	0	0	0	1	0	0	0	0	0	0	113		Bacteria	Proteobacteria	Betaproteobacteria	Burkholderiales	Oxalobacteraceae	Massilia	Massilia_aurea
ASV_1746	0	38	0	1	2	9	32	0	4	0	5	14	4	3	0	1	0	0	0	0	0	0	0	0	0	0	0	0	113		Bacteria	Acidobacteria	Acidobacteria_Gp6	Unassigned	Unassigned	Gp6	Unassigned
ASV_1790	0	53	0	6	1	3	5	0	5	1	9	12	8	6	0	4	0	0	0	0	0	0	0	0	0	0	0	0	113		Bacteria	Planctomycetes	Planctomycetia	Planctomycetales	Planctomycetaceae	Unassigned	Unassigned
ASV_2152	4	0	0	13	22	11	9	0	8	0	17	13	4	8	2	2	0	0	0	0	0	0	0	0	0	0	0	0	113		Bacteria	Acidobacteria	Acidobacteria_Gp7	Unassigned	Unassigned	Gp7	Unassigned
ASV_2537	28	0	3	4	29	3	0	0	1	5	4	1	1	14	19	1	0	0	0	0	0	0	0	0	0	0	0	0	113		Bacteria	Proteobacteria	Alphaproteobacteria	Sphingomonadales	Sphingomonadaceae	Sphingorhabdus	Sphingorhabdus_wooponensis
ASV_2767	0	0	0	2	1	4	96	0	2	0	2	1	0	2	0	3	0	0	0	0	0	0	0	0	0	0	0	0	113		Bacteria	Acidobacteria	Acidobacteria_Gp6	Unassigned	Unassigned	Gp6	Unassigned
ASV_1064	71	4	0	5	0	1	0	0	0	0	1	0	0	4	26	0	0	0	0	0	0	0	0	0	0	0	0	0	112		Bacteria	Bacteroidetes	Cytophagia	Cytophagales	Cytophagaceae	Hymenobacter	Hymenobacter_glaciei
ASV_1072	0	0	0	3	1	2	4	11	12	0	20	12	4	18	12	8	5	0	0	0	0	0	0	0	0	0	0	0	112		Bacteria	Actinobacteria	Actinobacteria	Unassigned	Unassigned	Unassigned	Unassigned
ASV_1148	0	0	0	2	6	0	78	0	4	1	6	7	2	4	1	1	0	0	0	0	0	0	0	0	0	0	0	0	112		Bacteria	Acidobacteria	Acidobacteria_Gp6	Unassigned	Unassigned	Gp6	Unassigned
ASV_1162	0	10	0	19	8	7	21	4	12	0	13	9	1	5	1	2	0	0	0	0	0	0	0	0	0	0	0	0	112		Bacteria	Acidobacteria	Acidobacteria_Gp6	Unassigned	Unassigned	Gp6	Unassigned
ASV_1285	1	0	0	40	4	13	4	2	10	4	19	9	2	0	0	4	0	0	0	0	0	0	0	0	0	0	0	0	112		Bacteria	Acidobacteria	Acidobacteria_Gp4	Unassigned	Unassigned	Aridibacter	Aridibacter_famidurans
ASV_1584	0	1	0	7	10	9	3	0	5	3	10	23	18	18	1	4	0	0	0	0	0	0	0	0	0	0	0	0	112		Bacteria	Actinobacteria	Actinobacteria	Unassigned	Unassigned	Unassigned	Unassigned
ASV_1780	0	0	0	0	1	0	1	10	4	4	5	5	0	1	2	2	0	0	0	0	0	0	0	0	0	0	77	0	112		Bacteria	Planctomycetes	Planctomycetia	Planctomycetales	Planctomycetaceae	Unassigned	Unassigned
ASV_1841	14	26	0	9	15	23	0	2	2	4	3	0	5	4	0	4	1	0	0	0	0	0	0	0	0	0	0	0	112		Bacteria	Proteobacteria	Betaproteobacteria	Unassigned	Unassigned	Unassigned	Unassigned
ASV_3195	0	0	0	2	4	9	14	1	29	2	15	18	7	10	1	0	0	0	0	0	0	0	0	0	0	0	0	0	112		Bacteria	Acidobacteria	Acidobacteria_Gp6	Unassigned	Unassigned	Gp6	Unassigned
ASV_4200	1	4	0	7	16	7	18	14	7	0	12	13	1	5	3	1	0	0	0	0	0	3	0	0	0	0	0	0	112		Bacteria	Candidatus_Saccharibacteria	Unassigned	Unassigned	Unassigned	Saccharibacteria_genera_incertae_sedis	Unassigned
ASV_4317	0	0	0	10	10	9	15	14	14	2	10	11	2	3	0	5	7	0	0	0	0	0	0	0	0	0	0	0	112		Bacteria	Acidobacteria	Acidobacteria_Gp6	Unassigned	Unassigned	Gp6	Unassigned
ASV_5005	0	0	0	12	7	7	3	1	5	6	15	20	0	21	3	12	0	0	0	0	0	0	0	0	0	0	0	0	112		Bacteria	Acidobacteria	Acidobacteria_Gp6	Unassigned	Unassigned	Gp6	Unassigned
ASV_5703	0	0	0	12	18	7	26	5	7	1	13	8	0	10	2	3	0	0	0	0	0	0	0	0	0	0	0	0	112		Bacteria	Acidobacteria	Acidobacteria_Gp4	Unassigned	Unassigned	Gp4	Unassigned
ASV_5843	0	0	0	5	4	15	18	19	10	3	10	8	2	6	0	5	6	0	1	0	0	0	0	0	0	0	0	0	112		Bacteria	Acidobacteria	Acidobacteria_Gp6	Unassigned	Unassigned	Gp6	Unassigned
ASV_868	8	0	9	6	1	1	0	3	3	1	1	0	2	11	64	1	0	0	0	0	0	0	0	0	0	0	0	0	111		Bacteria	Bacteroidetes	Flavobacteriia	Flavobacteriales	Flavobacteriaceae	Flavobacterium	Unassigned
ASV_876	3	14	0	4	13	22	10	0	13	0	11	10	1	9	1	0	0	0	0	0	0	0	0	0	0	0	0	0	111		Bacteria	Unassigned	Unassigned	Unassigned	Unassigned	Unassigned	Unassigned
ASV_902	0	0	0	0	0	0	0	0	0	0	0	0	0	0	0	0	4	17	17	5	12	20	9	5	2	0	6	14	111		Bacteria	Planctomycetes	Planctomycetia	Planctomycetales	Planctomycetaceae	Planctopirus	Planctopirus_limnophila
ASV_901	21	2	0	5	3	4	0	0	2	0	7	0	0	10	57	0	0	0	0	0	0	0	0	0	0	0	0	0	111		Bacteria	Bacteroidetes	Cytophagia	Cytophagales	Cytophagaceae	Hymenobacter	Hymenobacter_arizonensis
ASV_1093	0	0	0	4	0	4	1	0	28	6	7	28	15	8	0	7	3	0	0	0	0	0	0	0	0	0	0	0	111		Bacteria	Proteobacteria	Deltaproteobacteria	Unassigned	Unassigned	Unassigned	Unassigned
ASV_1171	0	104	0	0	0	6	0	0	0	0	0	0	0	0	0	1	0	0	0	0	0	0	0	0	0	0	0	0	111		Bacteria	Unassigned	Unassigned	Unassigned	Unassigned	Unassigned	Unassigned
ASV_1280	0	0	0	10	0	0	0	0	13	11	13	29	12	3	0	19	1	0	0	0	0	0	0	0	0	0	0	0	111		Bacteria	Acidobacteria	Acidobacteria_Gp6	Unassigned	Unassigned	Gp6	Unassigned
ASV_1384	2	54	0	0	0	34	4	0	3	1	4	7	1	0	1	0	0	0	0	0	0	0	0	0	0	0	0	0	111		Bacteria	Parcubacteria	Unassigned	Unassigned	Unassigned	Parcubacteria_genera_incertae_sedis	Unassigned
ASV_2745	0	0	0	2	3	3	59	0	2	0	13	9	3	4	1	11	1	0	0	0	0	0	0	0	0	0	0	0	111		Bacteria	Unassigned	Unassigned	Unassigned	Unassigned	Unassigned	Unassigned
ASV_5494	0	60	1	0	0	41	3	2	0	0	0	1	2	0	0	1	0	0	0	0	0	0	0	0	0	0	0	0	111		Bacteria	Parcubacteria	Unassigned	Unassigned	Unassigned	Parcubacteria_genera_incertae_sedis	Unassigned
ASV_850	0	0	0	0	0	101	0	0	0	9	0	0	0	0	0	0	0	0	0	0	0	0	0	0	0	0	0	0	110		Bacteria	Firmicutes	Bacilli	Bacillales	Planococcaceae	Unassigned	Unassigned
ASV_1025	0	0	0	7	1	2	9	0	15	5	21	10	3	5	16	11	3	1	1	0	0	0	0	0	0	0	0	0	110		Bacteria	Unassigned	Unassigned	Unassigned	Unassigned	Unassigned	Unassigned
ASV_1068	21	0	1	1	3	1	4	0	1	3	2	1	0	12	14	5	1	1	4	0	0	1	0	33	0	0	0	1	110		Bacteria	Proteobacteria	Alphaproteobacteria	Caulobacterales	Caulobacteraceae	Brevundimonas	Brevundimonas_denitrificans
ASV_1080	0	0	2	4	0	8	2	23	6	28	17	13	5	1	0	1	0	0	0	0	0	0	0	0	0	0	0	0	110		Bacteria	Candidatus_Saccharibacteria	Unassigned	Unassigned	Unassigned	Saccharibacteria_genera_incertae_sedis	Unassigned
ASV_1140	0	0	0	0	0	0	0	0	0	0	0	0	0	0	0	0	0	0	106	0	0	0	2	0	1	0	1	0	110		Bacteria	Parcubacteria	Unassigned	Unassigned	Unassigned	Parcubacteria_genera_incertae_sedis	Unassigned
ASV_1143	14	0	0	7	27	11	4	0	1	4	12	0	1	21	5	2	1	0	0	0	0	0	0	0	0	0	0	0	110		Bacteria	Proteobacteria	Alphaproteobacteria	Sphingomonadales	Sphingomonadaceae	Sphingorhabdus	Unassigned
ASV_1183	0	0	0	7	2	6	3	0	16	15	20	20	4	14	0	3	0	0	0	0	0	0	0	0	0	0	0	0	110		Bacteria	Acidobacteria	Acidobacteria_Gp4	Unassigned	Unassigned	Aridibacter	Aridibacter_famidurans
ASV_1308	0	5	0	15	41	7	1	3	8	0	14	3	2	2	8	1	0	0	0	0	0	0	0	0	0	0	0	0	110		Bacteria	Acidobacteria	Acidobacteria_Gp4	Unassigned	Unassigned	Aridibacter	Aridibacter_famidurans
ASV_1736	0	13	0	6	2	21	7	0	11	1	11	10	11	13	0	4	0	0	0	0	0	0	0	0	0	0	0	0	110		Bacteria	Unassigned	Unassigned	Unassigned	Unassigned	Unassigned	Unassigned
ASV_2704	0	0	0	5	8	22	1	2	13	7	21	11	4	13	2	0	1	0	0	0	0	0	0	0	0	0	0	0	110		Bacteria	Acidobacteria	Acidobacteria_Gp4	Unassigned	Unassigned	Aridibacter	Aridibacter_famidurans
ASV_2826	2	0	0	31	4	3	4	25	4	3	9	20	1	4	0	0	0	0	0	0	0	0	0	0	0	0	0	0	110		Bacteria	Candidatus_Saccharibacteria	Unassigned	Unassigned	Unassigned	Saccharibacteria_genera_incertae_sedis	Unassigned
ASV_4558	4	8	0	5	3	4	2	1	5	7	3	1	3	2	0	8	2	0	0	4	5	0	3	27	1	2	0	10	110		Bacteria	Proteobacteria	Betaproteobacteria	Burkholderiales	Unassigned	Unassigned	Unassigned
ASV_4632	0	0	0	8	6	1	5	0	38	1	13	31	1	4	0	2	0	0	0	0	0	0	0	0	0	0	0	0	110		Bacteria	Acidobacteria	Acidobacteria_Gp6	Unassigned	Unassigned	Gp6	Unassigned
ASV_4905	0	0	0	3	6	7	23	0	16	1	17	20	2	9	4	2	0	0	0	0	0	0	0	0	0	0	0	0	110		Bacteria	Actinobacteria	Actinobacteria	Unassigned	Unassigned	Unassigned	Unassigned
ASV_4955	2	20	2	0	2	2	2	18	13	19	4	6	2	14	1	2	0	1	0	0	0	0	0	0	0	0	0	0	110		Bacteria	SR1	Unassigned	Unassigned	Unassigned	SR1_genera_incertae_sedis	Unassigned
ASV_853	0	0	0	0	0	0	0	0	0	0	0	0	0	0	0	0	0	0	1	3	6	2	4	23	13	30	18	9	109		Bacteria	Bacteroidetes	Sphingobacteriia	Sphingobacteriales	Unassigned	Unassigned	Unassigned
ASV_910	0	5	3	7	27	48	0	0	1	3	7	2	5	1	0	0	0	0	0	0	0	0	0	0	0	0	0	0	109		Bacteria	Proteobacteria	Betaproteobacteria	Methylophilales	Methylophilaceae	Unassigned	Unassigned
ASV_1205	0	0	0	7	24	9	27	0	12	0	6	9	0	6	7	2	0	0	0	0	0	0	0	0	0	0	0	0	109		Bacteria	Acidobacteria	Acidobacteria_Gp4	Unassigned	Unassigned	Gp4	Unassigned
ASV_1274	0	6	0	19	3	6	15	1	9	4	16	4	2	5	4	6	6	1	1	0	1	0	0	0	0	0	0	0	109		Bacteria	Unassigned	Unassigned	Unassigned	Unassigned	Unassigned	Unassigned
ASV_1463	0	8	0	3	2	5	7	4	11	0	20	6	4	10	7	3	19	0	0	0	0	0	0	0	0	0	0	0	109		Bacteria	Actinobacteria	Actinobacteria	Unassigned	Unassigned	Unassigned	Unassigned
ASV_1857	0	0	3	1	1	0	0	37	3	8	14	12	8	10	0	6	0	1	0	0	0	0	1	0	1	0	2	1	109		Bacteria	Verrucomicrobia	Verrucomicrobiae	Verrucomicrobiales	Verrucomicrobiaceae	Prosthecobacter	Prosthecobacter_fluviatilis
ASV_2075	0	10	0	14	5	4	1	7	7	9	18	13	3	5	5	7	1	0	0	0	0	0	0	0	0	0	0	0	109		Bacteria	Planctomycetes	Planctomycetia	Planctomycetales	Planctomycetaceae	Unassigned	Unassigned
ASV_2088	0	0	0	8	3	7	50	1	4	0	16	14	4	2	0	0	0	0	0	0	0	0	0	0	0	0	0	0	109		Bacteria	Unassigned	Unassigned	Unassigned	Unassigned	Unassigned	Unassigned
ASV_2135	0	0	0	3	0	0	0	25	10	6	19	17	4	3	1	2	3	2	5	0	0	5	2	0	0	0	1	1	109		Bacteria	Candidatus_Saccharibacteria	Unassigned	Unassigned	Unassigned	Saccharibacteria_genera_incertae_sedis	Unassigned
ASV_2588	1	20	0	14	0	12	0	17	8	4	13	13	6	1	0	0	0	0	0	0	0	0	0	0	0	0	0	0	109		Bacteria	Candidatus_Saccharibacteria	Unassigned	Unassigned	Unassigned	Saccharibacteria_genera_incertae_sedis	Unassigned
ASV_3173	0	0	0	4	9	20	5	0	36	1	12	12	3	5	1	1	0	0	0	0	0	0	0	0	0	0	0	0	109		Bacteria	Acidobacteria	Acidobacteria_Gp6	Unassigned	Unassigned	Gp6	Unassigned
ASV_3351	0	0	0	21	13	5	15	0	10	2	12	15	4	5	2	5	0	0	0	0	0	0	0	0	0	0	0	0	109		Bacteria	Acidobacteria	Acidobacteria_Gp4	Unassigned	Unassigned	Aridibacter	Aridibacter_famidurans
ASV_3936	10	0	0	24	28	5	2	0	7	6	13	1	0	2	2	8	1	0	0	0	0	0	0	0	0	0	0	0	109		Bacteria	Bacteroidetes	Sphingobacteriia	Sphingobacteriales	Chitinophagaceae	Ferruginibacter	Ferruginibacter_lapsinanis
ASV_863	0	0	0	0	0	0	0	0	0	0	0	0	0	0	28	36	30	4	7	0	0	0	0	0	2	1	0	0	108		Bacteria	Planctomycetes	Planctomycetia	Planctomycetales	Planctomycetaceae	Unassigned	Unassigned
ASV_1190	0	0	0	25	6	1	6	6	4	7	26	10	5	6	0	4	0	1	0	0	0	0	0	0	1	0	0	0	108		Bacteria	Verrucomicrobia	Spartobacteria	Unassigned	Unassigned	Spartobacteria_genera_incertae_sedis	Unassigned
ASV_1226	0	0	0	10	14	0	7	0	55	2	11	5	0	3	1	0	0	0	0	0	0	0	0	0	0	0	0	0	108		Archaea	Thaumarchaeota	Unassigned	Nitrososphaerales	Nitrososphaeraceae	Nitrososphaera	Unassigned
ASV_1255	0	0	3	2	0	1	3	14	4	26	9	31	8	5	0	1	0	1	0	0	0	0	0	0	0	0	0	0	108		Bacteria	Candidatus_Saccharibacteria	Unassigned	Unassigned	Unassigned	Saccharibacteria_genera_incertae_sedis	Unassigned
ASV_1261	0	0	0	21	11	14	11	0	15	0	10	10	7	6	3	0	0	0	0	0	0	0	0	0	0	0	0	0	108		Bacteria	Verrucomicrobia	Spartobacteria	Unassigned	Unassigned	Spartobacteria_genera_incertae_sedis	Unassigned
ASV_1304	0	0	0	24	4	2	6	0	6	2	29	11	5	4	0	7	7	0	1	0	0	0	0	0	0	0	0	0	108		Bacteria	Unassigned	Unassigned	Unassigned	Unassigned	Unassigned	Unassigned
ASV_1416	1	5	4	2	1	1	0	6	1	0	6	0	2	73	4	2	0	0	0	0	0	0	0	0	0	0	0	0	108		Bacteria	Bacteroidetes	Flavobacteriia	Flavobacteriales	Flavobacteriaceae	Flavobacterium	Flavobacterium_algicola
ASV_1415	20	3	0	25	6	2	4	3	0	16	11	1	2	10	2	3	0	0	0	0	0	0	0	0	0	0	0	0	108		Bacteria	Proteobacteria	Alphaproteobacteria	Sphingomonadales	Sphingomonadaceae	Sphingorhabdus	Sphingorhabdus_arenilitoris
ASV_2813	0	4	0	5	7	4	54	1	12	0	4	9	1	3	1	3	0	0	0	0	0	0	0	0	0	0	0	0	108		Bacteria	Acidobacteria	Acidobacteria_Gp6	Unassigned	Unassigned	Gp6	Unassigned
ASV_3206	1	0	0	6	61	1	18	0	15	0	4	0	0	2	0	0	0	0	0	0	0	0	0	0	0	0	0	0	108		Archaea	Thaumarchaeota	Unassigned	Nitrososphaerales	Nitrososphaeraceae	Nitrososphaera	Unassigned
ASV_4648	0	0	0	21	20	15	8	2	5	1	18	6	4	6	0	2	0	0	0	0	0	0	0	0	0	0	0	0	108		Bacteria	Verrucomicrobia	Spartobacteria	Unassigned	Unassigned	Spartobacteria_genera_incertae_sedis	Unassigned
ASV_5378	0	0	0	15	3	8	4	8	3	13	22	14	5	2	6	0	0	0	5	0	0	0	0	0	0	0	0	0	108		Bacteria	Planctomycetes	Planctomycetia	Planctomycetales	Planctomycetaceae	Unassigned	Unassigned
ASV_896	4	0	3	11	58	15	0	0	3	0	2	0	0	2	7	0	0	0	0	0	0	1	0	1	0	0	0	0	107		Bacteria	Proteobacteria	Betaproteobacteria	Burkholderiales	Comamonadaceae	Unassigned	Unassigned
ASV_917	5	0	0	16	53	3	7	0	5	1	2	2	0	3	8	2	0	0	0	0	0	0	0	0	0	0	0	0	107		Bacteria	Proteobacteria	Gammaproteobacteria	Xanthomonadales	Xanthomonadaceae	Lysobacter	Lysobacter_ginsengisoli
ASV_955	0	0	0	0	0	0	0	2	0	0	0	0	0	0	1	0	5	38	15	3	5	4	3	1	5	0	10	15	107		Bacteria	Planctomycetes	Planctomycetia	Planctomycetales	Planctomycetaceae	Unassigned	Unassigned
ASV_1119	5	0	5	4	0	0	2	0	0	28	9	1	5	11	1	6	1	0	0	0	0	0	0	21	3	4	0	1	107		Bacteria	Proteobacteria	Alphaproteobacteria	Sphingomonadales	Sphingomonadaceae	Sphingorhabdus	Unassigned
ASV_1222	0	1	0	0	0	19	1	0	0	2	0	1	0	2	66	0	0	1	0	3	1	2	1	0	0	0	0	7	107		Bacteria	Firmicutes	Bacilli	Bacillales	Planococcaceae	Planococcus	Planococcus_maitriensis
ASV_1240	0	0	41	0	0	0	0	0	3	1	0	2	9	3	3	43	1	0	0	0	0	0	0	1	0	0	0	0	107		Bacteria	Proteobacteria	Betaproteobacteria	Burkholderiales	Burkholderiaceae	Polynucleobacter	Polynucleobacter_cosmopolitanus
ASV_1480	1	24	0	2	4	36	7	5	2	4	7	4	5	1	4	1	0	0	0	0	0	0	0	0	0	0	0	0	107		Bacteria	Candidatus_Saccharibacteria	Unassigned	Unassigned	Unassigned	Saccharibacteria_genera_incertae_sedis	Unassigned
ASV_1509	1	0	0	0	1	2	3	2	10	49	10	23	5	0	0	0	0	0	0	0	0	1	0	0	0	0	0	0	107		Bacteria	Candidatus_Saccharibacteria	Unassigned	Unassigned	Unassigned	Saccharibacteria_genera_incertae_sedis	Unassigned
ASV_1578	0	0	14	0	0	1	0	0	5	8	0	4	2	0	0	47	0	0	0	1	1	0	2	20	0	1	0	1	107		Bacteria	Proteobacteria	Betaproteobacteria	Burkholderiales	Comamonadaceae	Hydrogenophaga	Unassigned
ASV_1838	0	0	0	5	1	5	38	0	5	0	23	17	7	3	0	3	0	0	0	0	0	0	0	0	0	0	0	0	107		Bacteria	Unassigned	Unassigned	Unassigned	Unassigned	Unassigned	Unassigned
ASV_2319	0	0	1	4	1	0	0	42	11	11	8	22	3	3	1	0	0	0	0	0	0	0	0	0	0	0	0	0	107		Bacteria	Unassigned	Unassigned	Unassigned	Unassigned	Unassigned	Unassigned
ASV_2514	0	0	0	28	24	7	8	1	3	0	15	13	0	4	1	2	0	0	0	0	0	1	0	0	0	0	0	0	107		Bacteria	Verrucomicrobia	Spartobacteria	Unassigned	Unassigned	Spartobacteria_genera_incertae_sedis	Unassigned
ASV_3775	20	6	0	10	6	7	0	0	0	1	6	1	0	8	42	0	0	0	0	0	0	0	0	0	0	0	0	0	107		Bacteria	Bacteroidetes	Cytophagia	Cytophagales	Cytophagaceae	Hymenobacter	Unassigned
ASV_4062	0	0	0	3	0	0	0	7	4	3	28	3	4	7	7	12	12	3	4	2	4	1	0	0	0	1	2	0	107		Bacteria	Planctomycetes	Planctomycetia	Planctomycetales	Planctomycetaceae	Unassigned	Unassigned
ASV_5920	0	0	0	9	11	3	13	0	8	0	21	7	6	5	14	9	1	0	0	0	0	0	0	0	0	0	0	0	107		Bacteria	candidate_division_WPS-1	Unassigned	Unassigned	Unassigned	WPS-1_genera_incertae_sedis	Unassigned
ASV_889	0	85	0	0	0	12	0	0	4	1	2	2	0	0	0	0	0	0	0	0	0	0	0	0	0	0	0	0	106		Bacteria	Parcubacteria	Unassigned	Unassigned	Unassigned	Parcubacteria_genera_incertae_sedis	Unassigned
ASV_915	1	0	1	9	0	4	3	11	9	17	22	13	3	10	0	2	0	0	0	0	1	0	0	0	0	0	0	0	106		Bacteria	Planctomycetes	Planctomycetia	Planctomycetales	Planctomycetaceae	Unassigned	Unassigned
ASV_1028	0	1	3	3	4	1	0	0	4	51	3	0	19	4	0	10	1	0	0	0	1	0	0	1	0	0	0	0	106		Bacteria	Proteobacteria	Betaproteobacteria	Burkholderiales	Comamonadaceae	Unassigned	Unassigned
ASV_1039	5	0	0	20	34	16	2	0	0	1	4	1	0	11	6	2	0	0	0	0	0	1	0	3	0	0	0	0	106		Bacteria	Proteobacteria	Gammaproteobacteria	Xanthomonadales	Xanthomonadaceae	Unassigned	Unassigned
ASV_1061	0	0	19	0	0	0	0	0	6	10	0	5	39	0	1	25	1	0	0	0	0	0	0	0	0	0	0	0	106		Bacteria	Proteobacteria	Betaproteobacteria	Methylophilales	Methylophilaceae	Unassigned	Unassigned
ASV_1084	0	0	0	2	1	0	1	10	5	1	3	5	0	0	0	1	5	47	6	0	0	0	0	0	0	2	17	0	106		Bacteria	Unassigned	Unassigned	Unassigned	Unassigned	Unassigned	Unassigned
ASV_1264	0	0	2	0	0	0	3	69	2	13	3	10	2	2	0	0	0	0	0	0	0	0	0	0	0	0	0	0	106		Bacteria	Candidatus_Saccharibacteria	Unassigned	Unassigned	Unassigned	Saccharibacteria_genera_incertae_sedis	Unassigned
ASV_1287	5	0	0	14	15	14	4	0	11	0	13	19	3	6	0	2	0	0	0	0	0	0	0	0	0	0	0	0	106		Bacteria	Verrucomicrobia	Spartobacteria	Unassigned	Unassigned	Spartobacteria_genera_incertae_sedis	Unassigned
ASV_1347	0	0	103	0	0	2	0	0	1	0	0	0	0	0	0	0	0	0	0	0	0	0	0	0	0	0	0	0	106		Bacteria	Candidatus_Saccharibacteria	Unassigned	Unassigned	Unassigned	Saccharibacteria_genera_incertae_sedis	Unassigned
ASV_1818	3	2	0	9	16	5	0	0	2	1	4	0	5	1	0	57	1	0	0	0	0	0	0	0	0	0	0	0	106		Bacteria	Proteobacteria	Betaproteobacteria	Burkholderiales	Comamonadaceae	Variovorax	Unassigned
ASV_2275	0	0	0	24	6	11	11	1	16	0	10	12	3	9	0	3	0	0	0	0	0	0	0	0	0	0	0	0	106		Bacteria	Acidobacteria	Acidobacteria_Gp6	Unassigned	Unassigned	Gp6	Unassigned
ASV_3044	8	0	0	31	33	12	1	0	3	3	8	1	3	1	0	1	0	0	0	0	0	0	0	0	1	0	0	0	106		Bacteria	Bacteroidetes	Sphingobacteriia	Sphingobacteriales	Chitinophagaceae	Unassigned	Unassigned
ASV_3500	0	9	0	13	9	7	20	2	8	0	15	15	2	2	1	1	0	1	0	0	0	0	0	0	0	0	1	0	106		Bacteria	Chloroflexi	Caldilineae	Caldilineales	Caldilineaceae	Litorilinea	Litorilinea_aerophila
ASV_931	0	0	0	0	0	2	0	0	0	0	0	0	2	0	30	0	15	1	0	0	4	3	18	11	0	16	3	0	105		Bacteria	Proteobacteria	Alphaproteobacteria	Caulobacterales	Caulobacteraceae	Brevundimonas	Unassigned
ASV_966	0	0	0	0	0	1	0	2	0	18	0	0	0	1	58	0	0	0	1	0	0	0	0	0	0	24	0	0	105		Bacteria	Firmicutes	Bacilli	Bacillales	Bacillales_Incertae_Sedis_XII	Exiguobacterium	Unassigned
ASV_1056	0	0	0	2	0	2	1	0	12	50	20	8	2	4	1	2	1	0	0	0	0	0	0	0	0	0	0	0	105		Bacteria	Candidatus_Saccharibacteria	Unassigned	Unassigned	Unassigned	Saccharibacteria_genera_incertae_sedis	Unassigned
ASV_1073	1	0	0	4	6	26	2	8	15	0	14	19	1	2	6	1	0	0	0	0	0	0	0	0	0	0	0	0	105		Bacteria	Verrucomicrobia	Unassigned	Unassigned	Unassigned	Unassigned	Unassigned
ASV_1077	0	0	1	0	0	0	1	57	4	13	5	14	8	1	0	1	0	0	0	0	0	0	0	0	0	0	0	0	105		Bacteria	Unassigned	Unassigned	Unassigned	Unassigned	Unassigned	Unassigned
ASV_1107	1	0	0	1	1	0	0	0	0	0	3	1	0	1	38	36	16	1	0	0	1	0	0	0	1	0	2	2	105		Bacteria	Planctomycetes	Planctomycetia	Planctomycetales	Planctomycetaceae	Pirellula	Pirellula_staleyi
ASV_1122	1	0	2	0	1	0	0	0	0	0	0	0	1	1	61	0	16	0	13	0	0	0	0	4	0	0	5	0	105		Bacteria	Proteobacteria	Alphaproteobacteria	Caulobacterales	Caulobacteraceae	Brevundimonas	Unassigned
ASV_1186	0	7	0	20	25	3	3	2	7	0	9	11	2	8	1	7	0	0	0	0	0	0	0	0	0	0	0	0	105		Bacteria	Verrucomicrobia	Verrucomicrobiae	Verrucomicrobiales	Verrucomicrobiaceae	Unassigned	Unassigned
ASV_1237	0	0	0	0	0	0	0	0	13	32	20	23	6	4	2	2	0	3	0	0	0	0	0	0	0	0	0	0	105		Bacteria	Candidatus_Saccharibacteria	Unassigned	Unassigned	Unassigned	Saccharibacteria_genera_incertae_sedis	Unassigned
ASV_2089	0	0	0	27	6	10	5	15	15	2	12	8	0	3	0	2	0	0	0	0	0	0	0	0	0	0	0	0	105		Bacteria	Acidobacteria	Acidobacteria_Gp4	Unassigned	Unassigned	Aridibacter	Aridibacter_famidurans
ASV_2153	0	2	0	7	1	0	9	0	10	0	4	4	0	1	63	2	1	1	0	0	0	0	0	0	0	0	0	0	105		Bacteria	Unassigned	Unassigned	Unassigned	Unassigned	Unassigned	Unassigned
ASV_2330	0	0	0	1	1	0	6	46	9	8	7	21	6	0	0	0	0	0	0	0	0	0	0	0	0	0	0	0	105		Bacteria	Candidatus_Saccharibacteria	Unassigned	Unassigned	Unassigned	Saccharibacteria_genera_incertae_sedis	Unassigned
ASV_3379	0	0	9	1	0	0	3	59	4	5	13	5	2	3	1	0	0	0	0	0	0	0	0	0	0	0	0	0	105		Bacteria	Candidatus_Saccharibacteria	Unassigned	Unassigned	Unassigned	Saccharibacteria_genera_incertae_sedis	Unassigned
ASV_906	0	0	0	0	0	0	0	0	0	0	0	0	0	0	0	0	4	0	3	0	0	4	0	90	0	0	0	3	104		Bacteria	Bacteroidetes	Cytophagia	Cytophagales	Unassigned	Unassigned	Unassigned
ASV_945	0	0	0	0	0	0	0	0	0	0	0	0	1	0	0	1	4	0	2	2	13	3	3	7	2	2	4	60	104		Bacteria	Proteobacteria	Alphaproteobacteria	Caulobacterales	Hyphomonadaceae	Hyphomonas	Hyphomonas_polymorpha
ASV_965	0	74	2	0	0	2	0	1	1	6	1	0	2	0	2	1	1	0	0	1	2	1	1	3	2	1	0	0	104		Bacteria	Proteobacteria	Alphaproteobacteria	Rhizobiales	Unassigned	Unassigned	Unassigned
ASV_999	0	48	0	0	2	17	3	2	6	2	2	4	6	2	0	8	2	0	0	0	0	0	0	0	0	0	0	0	104		Bacteria	Acidobacteria	Unassigned	Unassigned	Unassigned	Unassigned	Unassigned
ASV_1037	0	71	1	0	0	0	4	0	2	7	7	3	4	4	0	1	0	0	0	0	0	0	0	0	0	0	0	0	104		Bacteria	Parcubacteria	Unassigned	Unassigned	Unassigned	Parcubacteria_genera_incertae_sedis	Unassigned
ASV_1042	0	0	0	0	0	0	0	1	0	0	0	2	0	0	2	0	6	18	19	2	2	12	5	1	4	7	7	16	104		Bacteria	Planctomycetes	Planctomycetia	Planctomycetales	Planctomycetaceae	Pirellula	Pirellula_staleyi
ASV_1134	0	1	5	0	10	3	0	0	2	5	4	2	5	1	1	65	0	0	0	0	0	0	0	0	0	0	0	0	104		Bacteria	Proteobacteria	Betaproteobacteria	Methylophilales	Methylophilaceae	Methylotenera	Methylotenera_versatilis
ASV_1149	23	0	0	9	1	2	0	0	0	1	1	1	2	10	53	0	0	0	1	0	0	0	0	0	0	0	0	0	104		Bacteria	Actinobacteria	Actinobacteria	Actinomycetales	Micrococcaceae	Arthrobacter	Unassigned
ASV_1594	0	7	0	2	3	0	78	0	3	0	7	1	3	0	0	0	0	0	0	0	0	0	0	0	0	0	0	0	104		Bacteria	Acidobacteria	Acidobacteria_Gp6	Unassigned	Unassigned	Gp6	Unassigned
ASV_1892	0	0	0	0	0	0	0	0	0	0	0	6	27	2	15	54	0	0	0	0	0	0	0	0	0	0	0	0	104		Bacteria	Unassigned	Unassigned	Unassigned	Unassigned	Unassigned	Unassigned
ASV_1911	0	0	0	36	25	9	5	1	2	1	19	3	0	1	2	0	0	0	0	0	0	0	0	0	0	0	0	0	104		Bacteria	Verrucomicrobia	Spartobacteria	Unassigned	Unassigned	Spartobacteria_genera_incertae_sedis	Unassigned
ASV_2440	0	0	93	0	0	0	0	0	0	6	0	0	2	0	0	3	0	0	0	0	0	0	0	0	0	0	0	0	104		Bacteria	Actinobacteria	Actinobacteria	Actinomycetales	Microbacteriaceae	Rhodoluna	Rhodoluna_lacicola
ASV_2714	1	0	0	21	9	4	6	11	8	1	18	7	4	7	0	6	0	0	0	0	0	0	0	0	0	0	1	0	104		Bacteria	Planctomycetes	Planctomycetia	Planctomycetales	Planctomycetaceae	Singulisphaera	Singulisphaera_rosea
ASV_2751	0	2	0	5	3	8	69	0	4	0	2	6	0	5	0	0	0	0	0	0	0	0	0	0	0	0	0	0	104		Bacteria	Unassigned	Unassigned	Unassigned	Unassigned	Unassigned	Unassigned
ASV_3060	0	0	0	6	2	2	57	0	7	1	3	17	3	5	0	1	0	0	0	0	0	0	0	0	0	0	0	0	104		Bacteria	Acidobacteria	Acidobacteria_Gp6	Unassigned	Unassigned	Gp6	Unassigned
ASV_3719	6	0	0	10	3	23	6	2	1	4	9	22	5	5	8	0	0	0	0	0	0	0	0	0	0	0	0	0	104		Bacteria	Candidatus_Saccharibacteria	Unassigned	Unassigned	Unassigned	Saccharibacteria_genera_incertae_sedis	Unassigned
ASV_5052	0	0	0	13	12	2	9	10	10	3	16	15	1	7	4	2	0	0	0	0	0	0	0	0	0	0	0	0	104		Bacteria	candidate_division_WPS-1	Unassigned	Unassigned	Unassigned	WPS-1_genera_incertae_sedis	Unassigned
ASV_880	0	99	0	2	0	2	0	0	0	0	0	0	0	0	0	0	0	0	0	0	0	0	0	0	0	0	0	0	103		Bacteria	Parcubacteria	Unassigned	Unassigned	Unassigned	Parcubacteria_genera_incertae_sedis	Unassigned
ASV_971	0	71	0	0	0	25	1	0	2	0	2	0	1	1	0	0	0	0	0	0	0	0	0	0	0	0	0	0	103		Bacteria	Parcubacteria	Unassigned	Unassigned	Unassigned	Parcubacteria_genera_incertae_sedis	Unassigned
ASV_986	0	0	1	0	1	0	0	20	5	20	8	3	18	12	4	4	0	0	7	0	0	0	0	0	0	0	0	0	103		Bacteria	Verrucomicrobia	Verrucomicrobiae	Verrucomicrobiales	Verrucomicrobiaceae	Luteolibacter	Unassigned
ASV_1024	30	42	0	0	0	3	0	0	0	3	2	0	0	9	0	1	1	6	0	1	0	2	0	3	0	0	0	0	103		Bacteria	Proteobacteria	Alphaproteobacteria	Caulobacterales	Caulobacteraceae	Brevundimonas	Unassigned
ASV_1089	16	2	0	2	2	5	1	0	0	5	12	1	0	16	37	2	1	0	0	0	0	0	0	1	0	0	0	0	103		Bacteria	Proteobacteria	Alphaproteobacteria	Caulobacterales	Caulobacteraceae	Brevundimonas	Unassigned
ASV_1316	0	0	0	0	0	0	103	0	0	0	0	0	0	0	0	0	0	0	0	0	0	0	0	0	0	0	0	0	103		Archaea	Euryarchaeota	Thermoplasmata	Thermoplasmatales	Unassigned	Unassigned	Unassigned
ASV_1474	0	3	0	20	12	3	29	0	9	0	7	7	1	9	2	1	0	0	0	0	0	0	0	0	0	0	0	0	103		Bacteria	Acidobacteria	Acidobacteria_Gp4	Unassigned	Unassigned	Gp4	Unassigned
ASV_1891	1	10	0	3	20	24	4	5	5	0	16	7	0	3	4	0	0	1	0	0	0	0	0	0	0	0	0	0	103		Bacteria	Candidatus_Saccharibacteria	Unassigned	Unassigned	Unassigned	Saccharibacteria_genera_incertae_sedis	Unassigned
ASV_2236	0	66	0	0	0	20	0	0	5	0	2	3	0	4	0	3	0	0	0	0	0	0	0	0	0	0	0	0	103		Bacteria	Parcubacteria	Unassigned	Unassigned	Unassigned	Parcubacteria_genera_incertae_sedis	Unassigned
ASV_2323	4	0	0	27	2	37	1	14	4	2	4	4	2	1	1	0	0	0	0	0	0	0	0	0	0	0	0	0	103		Bacteria	Candidatus_Saccharibacteria	Unassigned	Unassigned	Unassigned	Saccharibacteria_genera_incertae_sedis	Unassigned
ASV_2586	2	4	0	1	3	1	1	39	2	10	12	1	12	7	2	0	0	0	5	0	0	0	0	1	0	0	0	0	103		Bacteria	Verrucomicrobia	Verrucomicrobiae	Verrucomicrobiales	Verrucomicrobiaceae	Luteolibacter	Unassigned
ASV_2618	0	0	0	6	5	3	13	32	4	1	14	16	1	2	6	0	0	0	0	0	0	0	0	0	0	0	0	0	103		Bacteria	Planctomycetes	Planctomycetia	Planctomycetales	Planctomycetaceae	Unassigned	Unassigned
ASV_943	0	0	0	0	0	0	0	0	0	0	0	0	1	0	0	0	9	4	7	7	7	1	2	20	3	6	9	26	102		Bacteria	Bacteroidetes	Sphingobacteriia	Sphingobacteriales	Saprospiraceae	Unassigned	Unassigned
ASV_981	1	1	0	0	0	0	0	1	0	2	0	0	0	1	0	0	0	0	6	0	0	0	0	13	0	0	77	0	102		Bacteria	Actinobacteria	Actinobacteria	Actinomycetales	Mycobacteriaceae	Mycobacterium	Unassigned
ASV_1022	32	8	0	1	0	0	0	0	0	0	2	1	0	7	51	0	0	0	0	0	0	0	0	0	0	0	0	0	102		Bacteria	Bacteroidetes	Cytophagia	Cytophagales	Cytophagaceae	Hymenobacter	Hymenobacter_ruber
ASV_1027	15	3	0	1	6	16	1	0	3	16	5	1	3	15	9	7	1	0	0	0	0	0	0	0	0	0	0	0	102		Bacteria	Proteobacteria	Alphaproteobacteria	Caulobacterales	Caulobacteraceae	Brevundimonas	Unassigned
ASV_1111	0	51	0	0	1	4	0	0	7	0	4	14	14	2	1	4	0	0	0	0	0	0	0	0	0	0	0	0	102		Bacteria	Unassigned	Unassigned	Unassigned	Unassigned	Unassigned	Unassigned
ASV_1174	0	0	0	1	0	0	0	0	3	31	26	24	2	2	8	4	0	1	0	0	0	0	0	0	0	0	0	0	102		Bacteria	Candidatus_Saccharibacteria	Unassigned	Unassigned	Unassigned	Saccharibacteria_genera_incertae_sedis	Unassigned
ASV_1291	2	44	0	0	1	37	1	0	0	2	3	6	3	0	1	2	0	0	0	0	0	0	0	0	0	0	0	0	102		Bacteria	Parcubacteria	Unassigned	Unassigned	Unassigned	Parcubacteria_genera_incertae_sedis	Unassigned
ASV_1342	78	1	0	2	1	1	0	2	0	3	2	1	1	7	3	0	0	0	0	0	0	0	0	0	0	0	0	0	102		Bacteria	Proteobacteria	Alphaproteobacteria	Sphingomonadales	Sphingomonadaceae	Unassigned	Unassigned
ASV_1515	0	2	0	3	37	21	15	0	11	0	8	2	1	1	0	1	0	0	0	0	0	0	0	0	0	0	0	0	102		Bacteria	Acidobacteria	Acidobacteria_Gp6	Unassigned	Unassigned	Gp6	Unassigned
ASV_1598	10	0	1	1	5	4	0	0	1	29	6	2	2	25	9	7	0	0	0	0	0	0	0	0	0	0	0	0	102		Bacteria	Proteobacteria	Alphaproteobacteria	Sphingomonadales	Sphingomonadaceae	Sphingorhabdus	Sphingorhabdus_planktonica
ASV_1657	0	0	1	1	2	0	2	19	7	20	17	15	4	8	3	2	1	0	0	0	0	0	0	0	0	0	0	0	102		Bacteria	Candidatus_Saccharibacteria	Unassigned	Unassigned	Unassigned	Saccharibacteria_genera_incertae_sedis	Unassigned
ASV_1870	0	0	0	16	12	15	9	2	11	0	17	15	0	1	2	2	0	0	0	0	0	0	0	0	0	0	0	0	102		Bacteria	Chloroflexi	Caldilineae	Caldilineales	Caldilineaceae	Litorilinea	Litorilinea_aerophila
ASV_2148	1	14	0	3	4	14	11	0	12	0	15	8	4	14	1	1	0	0	0	0	0	0	0	0	0	0	0	0	102		Bacteria	Acidobacteria	Acidobacteria_Gp4	Unassigned	Unassigned	Gp4	Unassigned
ASV_2277	0	0	0	0	4	0	2	3	4	8	11	12	11	28	0	10	0	2	6	0	0	0	0	0	0	0	0	1	102		Bacteria	Verrucomicrobia	Verrucomicrobiae	Verrucomicrobiales	Verrucomicrobiaceae	Prosthecobacter	Prosthecobacter_vanneervenii
ASV_2469	1	0	0	1	5	9	0	0	7	6	4	6	3	5	1	3	1	12	7	5	2	4	3	1	3	1	5	7	102		Bacteria	Planctomycetes	Planctomycetia	Planctomycetales	Planctomycetaceae	Unassigned	Unassigned
ASV_2795	0	41	6	0	0	0	1	12	1	0	2	11	0	0	1	1	3	0	23	0	0	0	0	0	0	0	0	0	102		Bacteria	Parcubacteria	Unassigned	Unassigned	Unassigned	Parcubacteria_genera_incertae_sedis	Unassigned
ASV_2909	6	26	0	8	3	3	3	0	2	10	1	2	1	8	4	7	5	0	2	0	1	3	0	3	0	0	3	1	102		Bacteria	Proteobacteria	Alphaproteobacteria	Caulobacterales	Caulobacteraceae	Phenylobacterium	Phenylobacterium_haematophilum
ASV_3128	0	73	0	4	3	2	2	0	6	1	5	4	0	2	0	0	0	0	0	0	0	0	0	0	0	0	0	0	102		Bacteria	Unassigned	Unassigned	Unassigned	Unassigned	Unassigned	Unassigned
ASV_3390	6	18	1	4	6	10	0	4	11	9	9	9	3	8	2	2	0	0	0	0	0	0	0	0	0	0	0	0	102		Bacteria	Candidatus_Saccharibacteria	Unassigned	Unassigned	Unassigned	Saccharibacteria_genera_incertae_sedis	Unassigned
ASV_3567	0	1	0	14	6	14	24	1	9	0	11	8	6	5	0	3	0	0	0	0	0	0	0	0	0	0	0	0	102		Bacteria	Acidobacteria	Acidobacteria_Gp6	Unassigned	Unassigned	Gp6	Unassigned
ASV_3939	0	0	0	14	2	27	7	2	9	15	9	3	0	4	7	1	1	1	0	0	0	0	0	0	0	0	0	0	102		Bacteria	Unassigned	Unassigned	Unassigned	Unassigned	Unassigned	Unassigned
ASV_5427	6	0	0	15	3	5	2	19	6	8	15	7	4	5	0	0	1	6	0	0	0	0	0	0	0	0	0	0	102		Bacteria	Candidatus_Saccharibacteria	Unassigned	Unassigned	Unassigned	Saccharibacteria_genera_incertae_sedis	Unassigned
ASV_5756	2	0	0	8	11	14	25	0	11	0	8	9	0	14	0	0	0	0	0	0	0	0	0	0	0	0	0	0	102		Bacteria	Acidobacteria	Acidobacteria_Gp6	Unassigned	Unassigned	Gp6	Unassigned
ASV_919	0	0	0	19	31	31	1	0	3	2	2	0	9	1	0	2	0	0	0	0	0	0	0	0	0	0	0	0	101		Bacteria	Proteobacteria	Betaproteobacteria	Burkholderiales	Comamonadaceae	Variovorax	Unassigned
ASV_989	6	1	0	13	58	4	0	0	3	1	4	0	1	2	7	1	0	0	0	0	0	0	0	0	0	0	0	0	101		Bacteria	Proteobacteria	Gammaproteobacteria	Xanthomonadales	Xanthomonadaceae	Unassigned	Unassigned
ASV_1030	0	31	0	12	1	0	2	6	1	7	22	14	1	1	0	2	0	0	0	0	0	0	1	0	0	0	0	0	101		Bacteria	Candidatus_Saccharibacteria	Unassigned	Unassigned	Unassigned	Saccharibacteria_genera_incertae_sedis	Unassigned
ASV_1128	0	3	84	0	0	0	0	0	0	4	0	0	5	1	0	1	0	0	0	0	0	3	0	0	0	0	0	0	101		Bacteria	Proteobacteria	Betaproteobacteria	Burkholderiales	Burkholderiaceae	Polynucleobacter	Polynucleobacter_necessarius_subsp._asymbioticus
ASV_1296	0	0	0	0	0	2	0	0	0	0	0	1	1	2	1	83	2	2	2	1	1	0	0	0	0	0	1	2	101		Bacteria	Bacteroidetes	Cytophagia	Cytophagales	Cyclobacteriaceae	Algoriphagus	Algoriphagus_mannitolivorans
ASV_1303	24	8	0	7	4	12	0	0	4	11	5	3	5	16	0	2	0	0	0	0	0	0	0	0	0	0	0	0	101		Bacteria	Actinobacteria	Actinobacteria	Actinomycetales	Nocardioidaceae	Nocardioides	Unassigned
ASV_1356	0	15	0	15	2	4	6	0	7	1	23	9	0	8	5	2	1	3	0	0	0	0	0	0	0	0	0	0	101		Bacteria	Unassigned	Unassigned	Unassigned	Unassigned	Unassigned	Unassigned
ASV_1540	0	0	0	17	11	17	4	1	11	0	14	7	7	10	1	1	0	0	0	0	0	0	0	0	0	0	0	0	101		Bacteria	Actinobacteria	Actinobacteria	Unassigned	Unassigned	Unassigned	Unassigned
ASV_1541	1	0	0	22	5	10	5	0	5	1	22	11	6	9	2	2	0	0	0	0	0	0	0	0	0	0	0	0	101		Bacteria	Actinobacteria	Actinobacteria	Coriobacteriales	Coriobacteriaceae	Unassigned	Unassigned
ASV_1588	0	0	0	6	10	14	8	2	12	3	13	11	7	10	2	3	0	0	0	0	0	0	0	0	0	0	0	0	101		Bacteria	Acidobacteria	Acidobacteria_Gp4	Unassigned	Unassigned	Gp4	Unassigned
ASV_1629	0	9	1	6	3	27	20	0	6	1	14	4	3	6	1	0	0	0	0	0	0	0	0	0	0	0	0	0	101		Bacteria	Acidobacteria	Acidobacteria_Gp4	Unassigned	Unassigned	Gp4	Unassigned
ASV_1699	1	11	0	4	1	52	7	1	4	4	3	7	1	3	0	2	0	0	0	0	0	0	0	0	0	0	0	0	101		Bacteria	Unassigned	Unassigned	Unassigned	Unassigned	Unassigned	Unassigned
ASV_1850	0	0	2	1	0	0	2	2	10	33	8	19	4	4	1	9	1	2	0	1	0	0	0	0	0	0	2	0	101		Bacteria	Candidatus_Saccharibacteria	Unassigned	Unassigned	Unassigned	Saccharibacteria_genera_incertae_sedis	Unassigned
ASV_2034	0	1	0	9	10	34	3	0	20	2	3	13	3	2	0	0	1	0	0	0	0	0	0	0	0	0	0	0	101		Bacteria	Unassigned	Unassigned	Unassigned	Unassigned	Unassigned	Unassigned
ASV_3111	5	0	0	7	6	9	6	56	0	2	3	4	0	0	3	0	0	0	0	0	0	0	0	0	0	0	0	0	101		Bacteria	Candidatus_Saccharibacteria	Unassigned	Unassigned	Unassigned	Saccharibacteria_genera_incertae_sedis	Unassigned
ASV_5337	0	1	55	2	4	0	1	1	14	4	3	15	0	1	0	0	0	0	0	0	0	0	0	0	0	0	0	0	101		Bacteria	Candidatus_Saccharibacteria	Unassigned	Unassigned	Unassigned	Saccharibacteria_genera_incertae_sedis	Unassigned
ASV_960	0	0	24	15	0	0	0	34	2	4	9	5	1	4	2	0	0	0	0	0	0	0	0	0	0	0	0	0	100		Bacteria	Parcubacteria	Unassigned	Unassigned	Unassigned	Parcubacteria_genera_incertae_sedis	Unassigned
ASV_983	0	0	0	0	0	0	0	0	0	0	0	0	0	0	0	0	0	0	0	0	0	0	0	0	0	0	100	0	100		Bacteria	Parcubacteria	Unassigned	Unassigned	Unassigned	Parcubacteria_genera_incertae_sedis	Unassigned
ASV_1001	6	3	0	1	16	5	0	0	2	0	2	0	0	3	62	0	0	0	0	0	0	0	0	0	0	0	0	0	100		Bacteria	Proteobacteria	Betaproteobacteria	Burkholderiales	Oxalobacteraceae	Massilia	Unassigned
ASV_1085	0	0	0	0	0	0	0	0	0	0	0	0	0	0	0	0	0	2	2	0	8	0	3	56	11	8	3	7	100		Bacteria	Actinobacteria	Actinobacteria	Actinomycetales	Unassigned	Unassigned	Unassigned
ASV_1104	0	0	0	0	0	0	0	0	0	0	0	3	3	0	1	71	18	4	0	0	0	0	0	0	0	0	0	0	100		Bacteria	Verrucomicrobia	Verrucomicrobiae	Verrucomicrobiales	Verrucomicrobiaceae	Unassigned	Unassigned
ASV_1112	0	0	0	1	80	5	0	0	2	0	1	2	2	0	0	2	0	0	0	0	3	0	1	1	0	0	0	0	100		Bacteria	Proteobacteria	Betaproteobacteria	Burkholderiales	Comamonadaceae	Unassigned	Unassigned
ASV_1147	2	61	0	3	0	30	0	0	1	0	0	1	1	0	0	1	0	0	0	0	0	0	0	0	0	0	0	0	100		Bacteria	Parcubacteria	Unassigned	Unassigned	Unassigned	Parcubacteria_genera_incertae_sedis	Unassigned
ASV_1180	1	0	0	8	21	2	11	0	37	0	4	4	0	3	5	2	2	0	0	0	0	0	0	0	0	0	0	0	100		Archaea	Thaumarchaeota	Unassigned	Nitrososphaerales	Nitrososphaeraceae	Nitrososphaera	Unassigned
ASV_1187	51	0	0	0	0	2	2	3	2	7	12	1	0	19	1	0	0	0	0	0	0	0	0	0	0	0	0	0	100		Bacteria	Proteobacteria	Alphaproteobacteria	Caulobacterales	Caulobacteraceae	Brevundimonas	Unassigned
ASV_1640	0	0	0	0	0	0	1	83	1	2	4	2	2	5	0	0	0	0	0	0	0	0	0	0	0	0	0	0	100		Bacteria	Unassigned	Unassigned	Unassigned	Unassigned	Unassigned	Unassigned
ASV_1763	0	0	0	0	0	96	0	0	0	4	0	0	0	0	0	0	0	0	0	0	0	0	0	0	0	0	0	0	100		Bacteria	Firmicutes	Bacilli	Unassigned	Unassigned	Unassigned	Unassigned
ASV_2106	0	4	0	8	10	0	2	0	4	5	24	16	2	9	8	7	0	0	1	0	0	0	0	0	0	0	0	0	100		Bacteria	Planctomycetes	Planctomycetia	Planctomycetales	Planctomycetaceae	Pirellula	Pirellula_staleyi
ASV_2349	1	0	0	3	6	1	9	61	3	4	2	3	0	5	1	1	0	0	0	0	0	0	0	0	0	0	0	0	100		Bacteria	Candidatus_Saccharibacteria	Unassigned	Unassigned	Unassigned	Saccharibacteria_genera_incertae_sedis	Unassigned
ASV_2946	32	0	0	12	1	6	0	0	0	17	6	2	6	15	3	0	0	0	0	0	0	0	0	0	0	0	0	0	100		Bacteria	Actinobacteria	Actinobacteria	Actinomycetales	Intrasporangiaceae	Knoellia	Unassigned
ASV_3023	1	0	2	1	2	2	0	68	1	3	1	9	1	1	0	0	7	0	0	0	0	1	0	0	0	0	0	0	100		Bacteria	Candidatus_Saccharibacteria	Unassigned	Unassigned	Unassigned	Saccharibacteria_genera_incertae_sedis	Unassigned
ASV_3437	0	0	73	0	0	0	0	4	13	4	0	4	2	0	0	0	0	0	0	0	0	0	0	0	0	0	0	0	100		Bacteria	SR1	Unassigned	Unassigned	Unassigned	SR1_genera_incertae_sedis	Unassigned
ASV_3738	0	0	0	7	1	7	20	2	15	3	13	18	5	8	0	1	0	0	0	0	0	0	0	0	0	0	0	0	100		Bacteria	Acidobacteria	Acidobacteria_Gp6	Unassigned	Unassigned	Gp6	Unassigned
ASV_3915	7	0	0	14	7	0	5	8	10	6	15	17	6	2	3	0	0	0	0	0	0	0	0	0	0	0	0	0	100		Bacteria	Candidatus_Saccharibacteria	Unassigned	Unassigned	Unassigned	Saccharibacteria_genera_incertae_sedis	Unassigned
ASV_4345	0	1	1	1	2	9	12	6	5	5	20	21	1	8	7	0	1	0	0	0	0	0	0	0	0	0	0	0	100		Bacteria	Parcubacteria	Unassigned	Unassigned	Unassigned	Parcubacteria_genera_incertae_sedis	Unassigned
ASV_861	0	0	0	0	0	0	0	0	0	0	0	0	0	0	0	0	2	2	2	0	7	3	0	67	3	5	2	6	99		Bacteria	Bacteroidetes	Sphingobacteriia	Sphingobacteriales	Chitinophagaceae	Unassigned	Unassigned
ASV_893	0	0	0	0	1	0	0	0	0	1	0	0	0	1	36	38	22	0	0	0	0	0	0	0	0	0	0	0	99		Bacteria	Proteobacteria	Alphaproteobacteria	Rhizobiales	Bradyrhizobiaceae	Unassigned	Unassigned
ASV_911	0	0	0	0	0	0	0	94	1	0	2	1	1	0	0	0	0	0	0	0	0	0	0	0	0	0	0	0	99		Bacteria	Unassigned	Unassigned	Unassigned	Unassigned	Unassigned	Unassigned
ASV_939	0	0	0	0	0	0	0	0	0	0	0	0	0	0	0	0	0	0	1	2	6	1	4	75	5	3	1	1	99		Bacteria	Bacteroidetes	Sphingobacteriia	Sphingobacteriales	Chitinophagaceae	Flavihumibacter	Flavihumibacter_petaseus
ASV_1097	0	13	0	1	6	41	1	0	0	9	13	6	2	3	2	2	0	0	0	0	0	0	0	0	0	0	0	0	99		Bacteria	Candidatus_Saccharibacteria	Unassigned	Unassigned	Unassigned	Saccharibacteria_genera_incertae_sedis	Unassigned
ASV_1115	0	0	0	0	0	0	0	0	0	0	1	0	0	0	0	1	3	28	17	4	3	3	7	3	1	3	13	12	99		Bacteria	Planctomycetes	Planctomycetia	Planctomycetales	Planctomycetaceae	Blastopirellula	Blastopirellula_cremea
ASV_1170	27	29	0	4	0	1	1	0	0	0	3	1	0	9	24	0	0	0	0	0	0	0	0	0	0	0	0	0	99		Bacteria	Bacteroidetes	Cytophagia	Cytophagales	Cytophagaceae	Hymenobacter	Hymenobacter_elongatus
ASV_1216	15	0	0	0	0	4	0	2	1	42	7	4	10	4	4	0	0	1	0	0	0	0	0	0	0	0	5	0	99		Bacteria	Parcubacteria	Unassigned	Unassigned	Unassigned	Parcubacteria_genera_incertae_sedis	Unassigned
ASV_1223	16	0	0	0	0	0	0	1	0	0	0	0	0	1	53	0	12	0	0	0	0	0	0	16	0	0	0	0	99		Bacteria	Proteobacteria	Alphaproteobacteria	Sphingomonadales	Sphingomonadaceae	Sphingomonas	Unassigned
ASV_1367	3	2	1	1	1	5	2	4	0	12	3	0	1	17	12	1	3	7	0	3	4	4	0	5	2	3	3	0	99		Bacteria	Proteobacteria	Alphaproteobacteria	Caulobacterales	Caulobacteraceae	Brevundimonas	Unassigned
ASV_1522	0	6	0	3	1	1	0	61	3	1	7	6	3	5	2	0	0	0	0	0	0	0	0	0	0	0	0	0	99		Bacteria	Candidatus_Saccharibacteria	Unassigned	Unassigned	Unassigned	Saccharibacteria_genera_incertae_sedis	Unassigned
ASV_2227	8	0	0	8	11	14	1	2	6	14	8	2	4	7	3	6	4	0	0	0	0	0	0	0	0	0	1	0	99		Bacteria	Actinobacteria	Actinobacteria	Acidimicrobiales	Acidimicrobiaceae	Ilumatobacter	Ilumatobacter_fluminis
ASV_2361	43	0	0	9	4	0	1	2	0	0	7	0	0	12	21	0	0	0	0	0	0	0	0	0	0	0	0	0	99		Bacteria	Bacteroidetes	Cytophagia	Cytophagales	Cytophagaceae	Hymenobacter	Unassigned
ASV_2930	0	0	0	8	7	4	4	50	1	0	10	9	1	2	2	1	0	0	0	0	0	0	0	0	0	0	0	0	99		Bacteria	Candidatus_Saccharibacteria	Unassigned	Unassigned	Unassigned	Saccharibacteria_genera_incertae_sedis	Unassigned
ASV_2927	3	0	0	10	6	5	5	3	5	4	20	17	6	7	5	3	0	0	0	0	0	0	0	0	0	0	0	0	99		Bacteria	Unassigned	Unassigned	Unassigned	Unassigned	Unassigned	Unassigned
ASV_2966	0	0	0	4	5	0	69	1	4	0	4	6	0	4	0	2	0	0	0	0	0	0	0	0	0	0	0	0	99		Bacteria	Acidobacteria	Acidobacteria_Gp6	Unassigned	Unassigned	Gp6	Unassigned
ASV_3055	1	0	0	11	5	13	4	1	12	0	11	20	8	11	1	1	0	0	0	0	0	0	0	0	0	0	0	0	99		Bacteria	Acidobacteria	Acidobacteria_Gp6	Unassigned	Unassigned	Gp6	Unassigned
ASV_4139	0	0	0	14	15	12	11	0	11	0	9	16	3	3	0	5	0	0	0	0	0	0	0	0	0	0	0	0	99		Bacteria	Acidobacteria	Acidobacteria_Gp6	Unassigned	Unassigned	Gp6	Unassigned
ASV_4889	0	0	0	5	17	2	28	0	8	1	8	10	2	6	2	9	0	0	1	0	0	0	0	0	0	0	0	0	99		Bacteria	Acidobacteria	Acidobacteria_Gp6	Unassigned	Unassigned	Gp6	Unassigned
ASV_885	0	18	0	5	4	21	6	4	7	7	5	9	4	3	0	5	0	0	0	0	0	0	0	0	0	0	0	0	98		Bacteria	Planctomycetes	Planctomycetia	Planctomycetales	Planctomycetaceae	Pirellula	Pirellula_staleyi
ASV_914	0	0	0	1	0	0	0	0	1	0	3	0	0	1	0	0	79	0	11	2	0	0	0	0	0	0	0	0	98		Bacteria	Acidobacteria	Acidobacteria_Gp4	Unassigned	Unassigned	Aridibacter	Unassigned
ASV_949	19	8	0	1	0	1	0	1	1	49	2	1	4	9	2	0	0	0	0	0	0	0	0	0	0	0	0	0	98		Bacteria	Actinobacteria	Actinobacteria	Actinomycetales	Micrococcaceae	Arthrobacter	Arthrobacter_flavus
ASV_996	0	0	0	0	0	0	0	0	0	0	0	0	0	0	0	0	2	0	4	0	9	1	11	55	6	1	0	9	98		Bacteria	Actinobacteria	Actinobacteria	Actinomycetales	Unassigned	Unassigned	Unassigned
ASV_1010	0	0	0	0	0	0	0	0	0	0	0	0	0	0	0	0	1	1	3	2	4	1	0	63	1	1	1	20	98		Bacteria	Proteobacteria	Alphaproteobacteria	Unassigned	Unassigned	Unassigned	Unassigned
ASV_1057	0	0	0	0	0	0	0	0	0	0	0	0	2	0	1	84	8	0	3	0	0	0	0	0	0	0	0	0	98		Bacteria	Armatimonadetes	Armatimonadia	Armatimonadales	Armatimonadaceae	Armatimonas/Armatimonadetes_gp1	Unassigned
ASV_1211	75	2	0	4	3	1	0	0	0	2	2	0	0	4	5	0	0	0	0	0	0	0	0	0	0	0	0	0	98		Bacteria	Bacteroidetes	Cytophagia	Cytophagales	Cytophagaceae	Hymenobacter	Hymenobacter_glaciei
ASV_1485	3	0	0	19	17	20	0	0	3	5	9	2	0	15	3	1	0	0	0	0	0	0	0	0	0	0	1	0	98		Bacteria	Proteobacteria	Gammaproteobacteria	Xanthomonadales	Xanthomonadaceae	Lysobacter	Unassigned
ASV_1648	1	0	0	0	0	12	0	0	0	0	0	1	0	1	0	14	13	4	2	0	1	0	1	22	10	6	6	4	98		Bacteria	Actinobacteria	Actinobacteria	Acidimicrobiales	Acidimicrobiaceae	Ilumatobacter	Ilumatobacter_fluminis
ASV_1722	0	0	0	1	0	0	3	40	3	2	8	10	5	2	2	6	8	0	1	4	1	1	0	0	0	0	1	0	98		Bacteria	Unassigned	Unassigned	Unassigned	Unassigned	Unassigned	Unassigned
ASV_1931	14	6	0	12	12	8	2	0	0	9	10	5	6	7	5	1	1	0	0	0	0	0	0	0	0	0	0	0	98		Bacteria	Proteobacteria	Betaproteobacteria	Burkholderiales	Unassigned	Unassigned	Unassigned
ASV_2031	0	3	0	5	9	4	27	0	18	0	12	8	2	3	7	0	0	0	0	0	0	0	0	0	0	0	0	0	98		Bacteria	Unassigned	Unassigned	Unassigned	Unassigned	Unassigned	Unassigned
ASV_2420	6	0	0	16	33	20	1	2	4	3	7	1	0	3	2	0	0	0	0	0	0	0	0	0	0	0	0	0	98		Bacteria	Bacteroidetes	Sphingobacteriia	Sphingobacteriales	Chitinophagaceae	Unassigned	Unassigned
ASV_3664	0	0	2	0	2	0	0	0	66	0	3	14	1	2	0	1	7	0	0	0	0	0	0	0	0	0	0	0	98		Archaea	Euryarchaeota	Methanomicrobia	Methanomicrobiales	Methanoregulaceae	Methanoregula	Methanoregula_formicica
ASV_3761	2	6	0	14	41	17	0	0	1	1	4	3	6	1	0	1	1	0	0	0	0	0	0	0	0	0	0	0	98		Bacteria	Proteobacteria	Betaproteobacteria	Burkholderiales	Burkholderiales_incertae_sedis	Unassigned	Unassigned
ASV_4063	0	0	0	4	4	7	4	5	8	4	18	11	4	13	3	6	6	0	1	0	0	0	0	0	0	0	0	0	98		Bacteria	Actinobacteria	Actinobacteria	Unassigned	Unassigned	Unassigned	Unassigned
ASV_4726	1	32	0	7	4	3	18	2	6	0	4	6	6	2	1	5	1	0	0	0	0	0	0	0	0	0	0	0	98		Bacteria	Acidobacteria	Acidobacteria_Gp17	Unassigned	Unassigned	Gp17	Unassigned
ASV_4963	0	0	0	0	0	0	0	2	32	35	20	6	1	0	2	0	0	0	0	0	0	0	0	0	0	0	0	0	98		Bacteria	Candidatus_Saccharibacteria	Unassigned	Unassigned	Unassigned	Saccharibacteria_genera_incertae_sedis	Unassigned
ASV_957	9	0	0	0	0	0	2	0	0	2	0	1	0	61	1	0	0	0	0	16	0	0	0	2	3	0	0	0	97		Bacteria	Proteobacteria	Alphaproteobacteria	Caulobacterales	Caulobacteraceae	Brevundimonas	Brevundimonas_bacteroides
ASV_1038	0	83	0	0	0	8	0	0	2	0	1	1	0	1	0	1	0	0	0	0	0	0	0	0	0	0	0	0	97		Bacteria	Parcubacteria	Unassigned	Unassigned	Unassigned	Parcubacteria_genera_incertae_sedis	Unassigned
ASV_1048	0	0	0	15	1	0	13	0	11	3	6	11	6	12	1	17	1	0	0	0	0	0	0	0	0	0	0	0	97		Bacteria	Acidobacteria	Acidobacteria_Gp6	Unassigned	Unassigned	Gp6	Unassigned
ASV_1065	0	0	0	0	0	0	0	0	0	0	0	0	0	0	0	0	0	5	16	43	1	4	27	0	1	0	0	0	97		Bacteria	Unassigned	Unassigned	Unassigned	Unassigned	Unassigned	Unassigned
ASV_1146	0	0	0	3	0	3	0	54	4	9	9	8	1	4	2	0	0	0	0	0	0	0	0	0	0	0	0	0	97		Bacteria	Candidatus_Saccharibacteria	Unassigned	Unassigned	Unassigned	Saccharibacteria_genera_incertae_sedis	Unassigned
ASV_1227	0	16	0	7	13	11	8	0	9	0	10	5	0	11	6	1	0	0	0	0	0	0	0	0	0	0	0	0	97		Bacteria	Actinobacteria	Unassigned	Unassigned	Unassigned	Unassigned	Unassigned
ASV_1446	1	0	0	2	1	1	2	54	1	3	18	7	2	5	0	0	0	0	0	0	0	0	0	0	0	0	0	0	97		Bacteria	Candidatus_Saccharibacteria	Unassigned	Unassigned	Unassigned	Saccharibacteria_genera_incertae_sedis	Unassigned
ASV_1864	36	0	0	5	0	1	0	1	0	4	0	1	1	7	40	0	1	0	0	0	0	0	0	0	0	0	0	0	97		Bacteria	Actinobacteria	Actinobacteria	Actinomycetales	Micrococcaceae	Arthrobacter	Arthrobacter_siccitolerans
ASV_1895	2	44	2	0	0	34	1	0	6	1	0	3	1	1	0	2	0	0	0	0	0	0	0	0	0	0	0	0	97		Bacteria	Parcubacteria	Unassigned	Unassigned	Unassigned	Parcubacteria_genera_incertae_sedis	Unassigned
ASV_1909	1	0	0	16	25	11	6	0	12	1	3	9	0	3	6	4	0	0	0	0	0	0	0	0	0	0	0	0	97		Bacteria	Acidobacteria	Acidobacteria_Gp6	Unassigned	Unassigned	Gp6	Unassigned
ASV_2205	0	0	0	1	11	13	13	0	9	1	13	15	8	5	0	8	0	0	0	0	0	0	0	0	0	0	0	0	97		Bacteria	Acidobacteria	Acidobacteria_Gp6	Unassigned	Unassigned	Gp6	Unassigned
ASV_2965	11	1	0	25	28	16	2	0	0	0	4	1	3	2	0	4	0	0	0	0	0	0	0	0	0	0	0	0	97		Bacteria	Proteobacteria	Gammaproteobacteria	Pseudomonadales	Pseudomonadaceae	Rhizobacter	Unassigned
ASV_3115	0	69	0	2	2	7	2	0	4	0	4	3	2	2	0	0	0	0	0	0	0	0	0	0	0	0	0	0	97		Bacteria	Unassigned	Unassigned	Unassigned	Unassigned	Unassigned	Unassigned
ASV_3171	0	0	0	6	5	7	65	0	2	0	3	5	1	1	0	2	0	0	0	0	0	0	0	0	0	0	0	0	97		Bacteria	Acidobacteria	Acidobacteria_Gp6	Unassigned	Unassigned	Gp6	Unassigned
ASV_3398	0	6	0	4	2	4	63	0	3	0	4	5	1	3	0	2	0	0	0	0	0	0	0	0	0	0	0	0	97		Bacteria	Acidobacteria	Acidobacteria_Gp6	Unassigned	Unassigned	Gp6	Unassigned
ASV_4024	0	81	0	0	0	14	0	0	1	0	0	1	0	0	0	0	0	0	0	0	0	0	0	0	0	0	0	0	97		Bacteria	Verrucomicrobia	Unassigned	Unassigned	Unassigned	Unassigned	Unassigned
ASV_4117	1	0	0	5	3	3	30	0	5	2	23	11	3	9	1	1	0	0	0	0	0	0	0	0	0	0	0	0	97		Bacteria	Acidobacteria	Acidobacteria_Gp4	Unassigned	Unassigned	Gp4	Unassigned
ASV_4500	50	29	0	0	0	8	1	0	1	0	0	1	4	0	0	3	0	0	0	0	0	0	0	0	0	0	0	0	97		Bacteria	Parcubacteria	Unassigned	Unassigned	Unassigned	Parcubacteria_genera_incertae_sedis	Unassigned
ASV_998	0	76	0	0	1	3	0	0	0	0	2	0	0	0	2	6	0	0	0	0	0	0	2	0	0	0	4	0	96		Bacteria	Acidobacteria	Acidobacteria_Gp4	Unassigned	Unassigned	Aridibacter	Aridibacter_famidurans
ASV_1106	0	0	0	0	0	0	0	0	0	0	0	0	0	0	75	0	4	0	0	0	1	2	3	7	1	1	2	0	96		Bacteria	Proteobacteria	Alphaproteobacteria	Caulobacterales	Caulobacteraceae	Brevundimonas	Unassigned
ASV_1224	4	0	1	3	1	1	1	2	8	19	7	7	9	4	0	12	16	0	1	0	0	0	0	0	0	0	0	0	96		Bacteria	Proteobacteria	Gammaproteobacteria	Xanthomonadales	Sinobacteraceae	Povalibacter	Povalibacter_uvarum
ASV_1232	60	0	0	6	2	4	0	0	0	0	5	0	0	7	12	0	0	0	0	0	0	0	0	0	0	0	0	0	96		Bacteria	Bacteroidetes	Cytophagia	Cytophagales	Cytophagaceae	Hymenobacter	Hymenobacter_antarcticus
ASV_1411	3	0	3	51	4	11	1	0	9	3	2	7	0	2	0	0	0	0	0	0	0	0	0	0	0	0	0	0	96		Bacteria	Candidatus_Saccharibacteria	Unassigned	Unassigned	Unassigned	Saccharibacteria_genera_incertae_sedis	Unassigned
ASV_1576	0	0	0	4	0	0	5	23	4	3	26	15	2	4	2	1	7	0	0	0	0	0	0	0	0	0	0	0	96		Bacteria	Planctomycetes	Planctomycetia	Planctomycetales	Planctomycetaceae	Unassigned	Unassigned
ASV_1583	1	3	0	5	4	12	5	7	15	3	14	17	1	6	0	3	0	0	0	0	0	0	0	0	0	0	0	0	96		Bacteria	Acidobacteria	Acidobacteria_Gp6	Unassigned	Unassigned	Gp6	Unassigned
ASV_1604	0	32	0	2	0	8	3	0	1	2	6	16	6	5	0	15	0	0	0	0	0	0	0	0	0	0	0	0	96		Bacteria	Parcubacteria	Unassigned	Unassigned	Unassigned	Parcubacteria_genera_incertae_sedis	Unassigned
ASV_2421	0	0	0	22	6	10	5	0	16	3	14	8	1	1	8	2	0	0	0	0	0	0	0	0	0	0	0	0	96		Bacteria	Unassigned	Unassigned	Unassigned	Unassigned	Unassigned	Unassigned
ASV_2525	0	33	0	14	12	2	2	0	4	2	8	12	3	1	0	3	0	0	0	0	0	0	0	0	0	0	0	0	96		Bacteria	Armatimonadetes	Unassigned	Unassigned	Unassigned	Armatimonadetes_gp4	Unassigned
ASV_4792	1	31	0	7	3	0	3	10	2	3	9	9	1	3	6	2	0	1	0	0	0	1	0	0	0	0	4	0	96		Bacteria	Planctomycetes	Planctomycetia	Planctomycetales	Planctomycetaceae	Unassigned	Unassigned
ASV_5740	2	0	0	16	2	18	3	24	4	4	4	9	1	8	1	0	0	0	0	0	0	0	0	0	0	0	0	0	96		Bacteria	Candidatus_Saccharibacteria	Unassigned	Unassigned	Unassigned	Saccharibacteria_genera_incertae_sedis	Unassigned
ASV_961	0	43	0	2	0	39	0	0	1	1	0	3	1	1	0	4	0	0	0	0	0	0	0	0	0	0	0	0	95		Bacteria	Parcubacteria	Unassigned	Unassigned	Unassigned	Parcubacteria_genera_incertae_sedis	Unassigned
ASV_1327	0	0	0	1	3	0	0	0	10	5	24	17	8	13	0	13	0	1	0	0	0	0	0	0	0	0	0	0	95		Bacteria	Verrucomicrobia	Unassigned	Unassigned	Unassigned	Unassigned	Unassigned
ASV_1360	0	6	0	5	9	20	0	15	4	1	7	4	0	2	22	0	0	0	0	0	0	0	0	0	0	0	0	0	95		Bacteria	Candidatus_Saccharibacteria	Unassigned	Unassigned	Unassigned	Saccharibacteria_genera_incertae_sedis	Unassigned
ASV_1458	0	0	1	2	1	2	1	0	1	2	0	2	1	0	26	2	2	12	0	5	1	0	3	0	1	0	30	0	95		Bacteria	Proteobacteria	Alphaproteobacteria	Sphingomonadales	Sphingomonadaceae	Sphingopyxis	Sphingopyxis_soli
ASV_1483	0	0	0	1	0	5	1	50	4	5	8	11	2	2	5	1	0	0	0	0	0	0	0	0	0	0	0	0	95		Bacteria	Candidatus_Saccharibacteria	Unassigned	Unassigned	Unassigned	Saccharibacteria_genera_incertae_sedis	Unassigned
ASV_1698	1	0	0	9	3	9	6	43	3	3	12	2	0	4	0	0	0	0	0	0	0	0	0	0	0	0	0	0	95		Bacteria	Unassigned	Unassigned	Unassigned	Unassigned	Unassigned	Unassigned
ASV_1827	4	22	0	12	4	2	0	18	3	2	10	13	1	4	0	0	0	0	0	0	0	0	0	0	0	0	0	0	95		Bacteria	Candidatus_Saccharibacteria	Unassigned	Unassigned	Unassigned	Saccharibacteria_genera_incertae_sedis	Unassigned
ASV_1973	1	0	0	19	37	5	3	0	11	0	2	5	0	7	3	0	1	0	0	0	0	1	0	0	0	0	0	0	95		Bacteria	Candidatus_Saccharibacteria	Unassigned	Unassigned	Unassigned	Saccharibacteria_genera_incertae_sedis	Unassigned
ASV_2241	55	27	1	0	0	0	0	0	0	0	3	0	2	0	6	0	0	0	0	0	0	0	1	0	0	0	0	0	95		Bacteria	Parcubacteria	Unassigned	Unassigned	Unassigned	Parcubacteria_genera_incertae_sedis	Unassigned
ASV_2376	7	44	28	1	0	0	0	0	3	2	3	6	0	1	0	0	0	0	0	0	0	0	0	0	0	0	0	0	95		Bacteria	Candidatus_Saccharibacteria	Unassigned	Unassigned	Unassigned	Saccharibacteria_genera_incertae_sedis	Unassigned
ASV_2434	0	46	0	0	0	30	2	0	0	1	1	6	6	0	1	2	0	0	0	0	0	0	0	0	0	0	0	0	95		Bacteria	Parcubacteria	Unassigned	Unassigned	Unassigned	Parcubacteria_genera_incertae_sedis	Unassigned
ASV_3027	0	0	0	8	9	9	15	1	20	0	9	12	3	7	0	2	0	0	0	0	0	0	0	0	0	0	0	0	95		Bacteria	Acidobacteria	Acidobacteria_Gp6	Unassigned	Unassigned	Gp6	Unassigned
ASV_3164	0	2	0	2	6	4	24	0	25	1	7	9	0	3	8	4	0	0	0	0	0	0	0	0	0	0	0	0	95		Bacteria	Acidobacteria	Acidobacteria_Gp6	Unassigned	Unassigned	Gp6	Unassigned
ASV_3534	0	2	0	9	25	5	5	0	6	3	18	5	3	5	4	4	0	0	1	0	0	0	0	0	0	0	0	0	95		Bacteria	Acidobacteria	Acidobacteria_Gp22	Unassigned	Unassigned	Gp22	Unassigned
ASV_4192	0	6	0	8	16	13	4	0	15	0	12	7	2	3	4	5	0	0	0	0	0	0	0	0	0	0	0	0	95		Bacteria	candidate_division_WPS-1	Unassigned	Unassigned	Unassigned	WPS-1_genera_incertae_sedis	Unassigned
ASV_4233	30	21	0	10	1	2	0	0	0	0	2	2	0	7	20	0	0	0	0	0	0	0	0	0	0	0	0	0	95		Bacteria	Bacteroidetes	Cytophagia	Cytophagales	Cytophagaceae	Hymenobacter	Unassigned
ASV_1058	19	0	0	2	3	12	1	0	0	3	3	0	0	13	35	0	0	1	0	0	0	0	0	1	0	0	0	1	94		Bacteria	Proteobacteria	Alphaproteobacteria	Caulobacterales	Caulobacteraceae	Brevundimonas	Unassigned
ASV_1071	0	50	22	3	0	4	0	4	2	2	1	3	2	0	0	0	1	0	0	0	0	0	0	0	0	0	0	0	94		Bacteria	Parcubacteria	Unassigned	Unassigned	Unassigned	Parcubacteria_genera_incertae_sedis	Unassigned
ASV_1074	0	0	0	0	0	0	1	0	10	45	10	16	4	8	0	0	0	0	0	0	0	0	0	0	0	0	0	0	94		Bacteria	Candidatus_Saccharibacteria	Unassigned	Unassigned	Unassigned	Saccharibacteria_genera_incertae_sedis	Unassigned
ASV_1126	0	0	7	4	8	0	1	0	32	3	6	17	2	6	1	2	5	0	0	0	0	0	0	0	0	0	0	0	94		Archaea	Euryarchaeota	Methanomicrobia	Methanosarcinales	Methanosarcinaceae	Methanosarcina	Methanosarcina_mazei
ASV_1270	1	49	0	17	3	16	1	0	1	0	2	2	0	1	0	1	0	0	0	0	0	0	0	0	0	0	0	0	94		Bacteria	Candidatus_Saccharibacteria	Unassigned	Unassigned	Unassigned	Saccharibacteria_genera_incertae_sedis	Unassigned
ASV_1292	19	0	4	1	4	1	2	1	1	9	14	0	0	18	18	2	0	0	0	0	0	0	0	0	0	0	0	0	94		Bacteria	Proteobacteria	Alphaproteobacteria	Caulobacterales	Caulobacteraceae	Brevundimonas	Brevundimonas_variabilis
ASV_1323	0	0	0	0	0	0	0	0	0	0	0	0	0	0	0	0	1	1	2	0	6	3	2	46	9	11	1	12	94		Bacteria	Actinobacteria	Actinobacteria	Actinomycetales	Microbacteriaceae	Pontimonas	Pontimonas_salivibrio
ASV_1357	0	12	0	11	23	3	3	0	4	0	17	9	0	7	2	3	0	0	0	0	0	0	0	0	0	0	0	0	94		Bacteria	Unassigned	Unassigned	Unassigned	Unassigned	Unassigned	Unassigned
ASV_1449	1	0	0	42	7	9	15	0	2	0	11	7	0	0	0	0	0	0	0	0	0	0	0	0	0	0	0	0	94		Bacteria	Candidatus_Saccharibacteria	Unassigned	Unassigned	Unassigned	Saccharibacteria_genera_incertae_sedis	Unassigned
ASV_1469	1	25	0	4	3	12	4	0	16	1	5	12	8	3	0	0	0	0	0	0	0	0	0	0	0	0	0	0	94		Bacteria	Acidobacteria	Acidobacteria_Gp6	Unassigned	Unassigned	Gp6	Unassigned
ASV_1504	0	0	0	19	5	12	6	6	13	3	10	6	1	4	3	5	1	0	0	0	0	0	0	0	0	0	0	0	94		Bacteria	Acidobacteria	Acidobacteria_Gp4	Unassigned	Unassigned	Aridibacter	Aridibacter_famidurans
ASV_1700	5	0	1	14	2	24	2	2	4	1	16	7	2	9	5	0	0	0	0	0	0	0	0	0	0	0	0	0	94		Bacteria	Candidatus_Saccharibacteria	Unassigned	Unassigned	Unassigned	Saccharibacteria_genera_incertae_sedis	Unassigned
ASV_1979	1	4	1	2	1	29	10	0	8	6	6	8	9	2	1	6	0	0	0	0	0	0	0	0	0	0	0	0	94		Bacteria	Parcubacteria	Unassigned	Unassigned	Unassigned	Parcubacteria_genera_incertae_sedis	Unassigned
ASV_1990	0	0	0	1	0	1	0	74	0	1	13	4	0	0	0	0	0	0	0	0	0	0	0	0	0	0	0	0	94		Bacteria	Candidatus_Saccharibacteria	Unassigned	Unassigned	Unassigned	Saccharibacteria_genera_incertae_sedis	Unassigned
ASV_1986	11	0	0	2	2	7	2	0	0	51	7	0	1	5	3	3	0	0	0	0	0	0	0	0	0	0	0	0	94		Bacteria	Proteobacteria	Alphaproteobacteria	Sphingomonadales	Sphingomonadaceae	Unassigned	Unassigned
ASV_2028	0	0	0	23	2	2	15	0	6	3	13	8	4	11	3	3	1	0	0	0	0	0	0	0	0	0	0	0	94		Bacteria	Unassigned	Unassigned	Unassigned	Unassigned	Unassigned	Unassigned
ASV_2265	1	0	0	7	4	21	11	0	9	0	17	10	2	11	1	0	0	0	0	0	0	0	0	0	0	0	0	0	94		Bacteria	Unassigned	Unassigned	Unassigned	Unassigned	Unassigned	Unassigned
ASV_2419	0	0	0	1	4	34	14	0	29	0	6	1	2	3	0	0	0	0	0	0	0	0	0	0	0	0	0	0	94		Bacteria	Acidobacteria	Unassigned	Unassigned	Unassigned	Unassigned	Unassigned
ASV_2521	17	4	0	13	8	23	0	0	1	7	7	2	0	8	2	2	0	0	0	0	0	0	0	0	0	0	0	0	94		Bacteria	Proteobacteria	Alphaproteobacteria	Sphingomonadales	Sphingomonadaceae	Unassigned	Unassigned
ASV_2552	0	79	0	0	0	12	1	0	0	0	0	1	0	0	1	0	0	0	0	0	0	0	0	0	0	0	0	0	94		Bacteria	Parcubacteria	Unassigned	Unassigned	Unassigned	Parcubacteria_genera_incertae_sedis	Unassigned
ASV_2903	0	0	0	0	2	0	1	0	35	3	9	25	7	11	0	1	0	0	0	0	0	0	0	0	0	0	0	0	94		Bacteria	Acidobacteria	Acidobacteria_Gp6	Unassigned	Unassigned	Gp6	Unassigned
ASV_3202	0	0	0	7	13	12	20	0	10	0	10	7	3	8	0	4	0	0	0	0	0	0	0	0	0	0	0	0	94		Bacteria	Acidobacteria	Acidobacteria_Gp6	Unassigned	Unassigned	Gp6	Unassigned
ASV_3323	0	0	0	4	11	1	8	0	27	2	14	13	1	4	2	7	0	0	0	0	0	0	0	0	0	0	0	0	94		Bacteria	Acidobacteria	Acidobacteria_Gp6	Unassigned	Unassigned	Gp6	Unassigned
ASV_3397	0	0	0	4	5	1	3	37	4	2	16	17	1	4	0	0	0	0	0	0	0	0	0	0	0	0	0	0	94		Bacteria	Candidatus_Saccharibacteria	Unassigned	Unassigned	Unassigned	Saccharibacteria_genera_incertae_sedis	Unassigned
ASV_5325	6	14	0	3	7	9	4	13	7	1	9	12	1	1	7	0	0	0	0	0	0	0	0	0	0	0	0	0	94		Bacteria	Candidatus_Saccharibacteria	Unassigned	Unassigned	Unassigned	Saccharibacteria_genera_incertae_sedis	Unassigned
ASV_933	0	74	0	0	0	16	0	0	1	0	0	0	1	0	0	1	0	0	0	0	0	0	0	0	0	0	0	0	93		Bacteria	Unassigned	Unassigned	Unassigned	Unassigned	Unassigned	Unassigned
ASV_988	0	55	3	1	0	15	0	5	1	0	1	4	4	1	0	3	0	0	0	0	0	0	0	0	0	0	0	0	93		Bacteria	Parcubacteria	Unassigned	Unassigned	Unassigned	Parcubacteria_genera_incertae_sedis	Unassigned
ASV_1046	9	0	0	0	6	1	3	2	2	2	10	2	1	22	26	0	0	0	2	0	0	0	0	3	0	0	2	0	93		Bacteria	Proteobacteria	Alphaproteobacteria	Caulobacterales	Caulobacteraceae	Brevundimonas	Brevundimonas_basaltis
ASV_1060	1	17	1	6	12	16	6	2	4	2	11	5	2	1	4	2	0	1	0	0	0	0	0	0	0	0	0	0	93		Bacteria	Candidatus_Saccharibacteria	Unassigned	Unassigned	Unassigned	Saccharibacteria_genera_incertae_sedis	Unassigned
ASV_1067	0	14	0	0	6	0	1	0	6	0	0	8	2	2	4	42	6	2	0	0	0	0	0	0	0	0	0	0	93		Bacteria	Verrucomicrobia	Verrucomicrobiae	Verrucomicrobiales	Verrucomicrobiaceae	Prosthecobacter	Prosthecobacter_vanneervenii
ASV_1124	1	5	0	8	20	1	3	15	4	0	10	6	0	8	4	2	3	0	0	0	0	0	0	0	0	0	0	3	93		Bacteria	Verrucomicrobia	Spartobacteria	Unassigned	Unassigned	Spartobacteria_genera_incertae_sedis	Unassigned
ASV_1166	58	9	0	0	3	4	0	6	2	1	4	1	0	4	1	0	0	0	0	0	0	0	0	0	0	0	0	0	93		Bacteria	Proteobacteria	Alphaproteobacteria	Sphingomonadales	Sphingomonadaceae	Sphingomonas	Sphingomonas_fennica
ASV_1312	0	0	0	5	1	7	0	25	6	5	7	23	7	7	0	0	0	0	0	0	0	0	0	0	0	0	0	0	93		Bacteria	Chloroflexi	Caldilineae	Caldilineales	Caldilineaceae	Caldilinea	Caldilinea_tarbellica
ASV_1558	10	0	0	18	36	3	2	0	1	2	3	0	0	9	6	1	0	0	0	0	0	0	0	0	0	0	0	2	93		Bacteria	Bacteroidetes	Sphingobacteriia	Sphingobacteriales	Chitinophagaceae	Ferruginibacter	Ferruginibacter_yonginensis
ASV_1554	12	0	1	23	9	12	3	0	3	10	7	2	1	7	3	0	0	0	0	0	0	0	0	0	0	0	0	0	93		Bacteria	Proteobacteria	Alphaproteobacteria	Sphingomonadales	Sphingomonadaceae	Sphingomonas	Unassigned
ASV_1571	1	7	7	1	2	0	1	3	3	31	4	0	1	6	0	0	2	0	2	0	11	1	0	0	0	9	0	1	93		Bacteria	Proteobacteria	Alphaproteobacteria	Rhodobacterales	Rhodobacteraceae	Unassigned	Unassigned
ASV_1625	0	0	0	11	21	5	5	0	32	1	9	4	0	3	0	2	0	0	0	0	0	0	0	0	0	0	0	0	93		Archaea	Thaumarchaeota	Unassigned	Nitrososphaerales	Nitrososphaeraceae	Nitrososphaera	Unassigned
ASV_1829	4	0	0	6	8	3	0	1	6	1	28	0	0	20	16	0	0	0	0	0	0	0	0	0	0	0	0	0	93		Bacteria	Bacteroidetes	Cytophagia	Cytophagales	Cytophagaceae	Hymenobacter	Hymenobacter_arizonensis
ASV_1929	13	0	0	20	5	25	0	0	2	7	0	1	2	14	3	0	0	0	0	0	0	0	0	1	0	0	0	0	93		Bacteria	Proteobacteria	Alphaproteobacteria	Sphingomonadales	Sphingomonadaceae	Parablastomonas	Parablastomonas_arctica
ASV_1940	0	0	0	0	0	0	0	1	1	10	5	11	4	5	1	3	0	3	0	0	0	0	0	0	0	0	49	0	93		Bacteria	Candidatus_Saccharibacteria	Unassigned	Unassigned	Unassigned	Saccharibacteria_genera_incertae_sedis	Unassigned
ASV_2040	1	38	15	0	0	10	2	0	4	0	5	7	4	5	0	2	0	0	0	0	0	0	0	0	0	0	0	0	93		Bacteria	Parcubacteria	Unassigned	Unassigned	Unassigned	Parcubacteria_genera_incertae_sedis	Unassigned
ASV_2177	0	84	0	0	0	6	2	0	0	0	0	1	0	0	0	0	0	0	0	0	0	0	0	0	0	0	0	0	93		Bacteria	Parcubacteria	Unassigned	Unassigned	Unassigned	Parcubacteria_genera_incertae_sedis	Unassigned
ASV_2326	0	0	3	2	0	0	0	0	20	26	8	25	2	5	2	0	0	0	0	0	0	0	0	0	0	0	0	0	93		Bacteria	Unassigned	Unassigned	Unassigned	Unassigned	Unassigned	Unassigned
ASV_2594	3	0	0	23	5	15	5	11	6	4	2	13	4	2	0	0	0	0	0	0	0	0	0	0	0	0	0	0	93		Bacteria	Candidatus_Saccharibacteria	Unassigned	Unassigned	Unassigned	Saccharibacteria_genera_incertae_sedis	Unassigned
ASV_3054	1	0	0	7	16	6	23	0	13	0	8	9	1	4	1	4	0	0	0	0	0	0	0	0	0	0	0	0	93		Bacteria	Acidobacteria	Acidobacteria_Gp6	Unassigned	Unassigned	Gp6	Unassigned
ASV_3380	22	13	0	1	0	1	1	46	0	8	0	0	0	0	0	0	0	0	0	0	0	0	0	0	1	0	0	0	93		Bacteria	Proteobacteria	Gammaproteobacteria	Pseudomonadales	Pseudomonadaceae	Pseudomonas	Unassigned
ASV_4217	0	0	0	6	6	12	46	1	7	0	6	6	2	1	0	0	0	0	0	0	0	0	0	0	0	0	0	0	93		Bacteria	Acidobacteria	Acidobacteria_Gp6	Unassigned	Unassigned	Gp6	Unassigned
ASV_4457	13	0	0	8	4	4	0	0	0	1	17	0	0	32	14	0	0	0	0	0	0	0	0	0	0	0	0	0	93		Bacteria	Bacteroidetes	Cytophagia	Cytophagales	Cytophagaceae	Hymenobacter	Unassigned
ASV_4575	0	0	0	5	2	0	0	3	4	21	18	19	3	10	2	5	1	0	0	0	0	0	0	0	0	0	0	0	93		Bacteria	Planctomycetes	Planctomycetia	Planctomycetales	Planctomycetaceae	Pirellula	Pirellula_staleyi
ASV_5761	2	1	0	18	36	8	4	0	7	1	8	0	0	5	1	2	0	0	0	0	0	0	0	0	0	0	0	0	93		Bacteria	Bacteroidetes	Sphingobacteriia	Sphingobacteriales	Chitinophagaceae	Ferruginibacter	Ferruginibacter_yonginensis
ASV_5886	0	0	0	5	4	0	7	27	2	3	21	11	1	4	0	2	0	0	2	0	0	0	0	0	0	0	4	0	93		Bacteria	Planctomycetes	Planctomycetia	Planctomycetales	Planctomycetaceae	Unassigned	Unassigned
ASV_969	0	0	0	0	0	1	0	10	1	0	1	4	0	1	2	1	69	0	2	0	0	0	0	0	0	0	0	0	92		Bacteria	Chloroflexi	Unassigned	Unassigned	Unassigned	Unassigned	Unassigned
ASV_1020	0	0	0	2	2	15	2	12	4	9	21	11	7	5	1	1	0	0	0	0	0	0	0	0	0	0	0	0	92		Bacteria	Candidatus_Saccharibacteria	Unassigned	Unassigned	Unassigned	Saccharibacteria_genera_incertae_sedis	Unassigned
ASV_1070	0	0	0	0	0	0	0	0	0	0	0	0	0	0	1	0	7	1	64	0	0	1	0	1	0	0	17	0	92		Bacteria	Proteobacteria	Alphaproteobacteria	Caulobacterales	Caulobacteraceae	Brevundimonas	Unassigned
ASV_1088	0	0	0	0	0	0	0	0	0	0	0	0	1	0	1	71	3	1	4	1	1	4	0	3	0	0	0	2	92		Bacteria	Bacteroidetes	Cytophagia	Cytophagales	Cyclobacteriaceae	Algoriphagus	Unassigned
ASV_1155	0	0	0	1	0	2	0	0	0	0	0	0	0	0	0	0	4	0	85	0	0	0	0	0	0	0	0	0	92		Bacteria	Chloroflexi	Unassigned	Unassigned	Unassigned	Unassigned	Unassigned
ASV_1157	0	3	0	3	6	16	16	1	12	0	10	13	0	7	4	1	0	0	0	0	0	0	0	0	0	0	0	0	92		Bacteria	Unassigned	Unassigned	Unassigned	Unassigned	Unassigned	Unassigned
ASV_1185	0	10	0	6	10	22	14	1	5	0	9	8	0	4	3	0	0	0	0	0	0	0	0	0	0	0	0	0	92		Bacteria	Actinobacteria	Actinobacteria	Unassigned	Unassigned	Unassigned	Unassigned
ASV_1191	0	63	0	3	1	6	1	2	1	3	6	4	0	0	0	2	0	0	0	0	0	0	0	0	0	0	0	0	92		Bacteria	Planctomycetes	Planctomycetia	Planctomycetales	Planctomycetaceae	Schlesneria	Schlesneria_paludicola
ASV_1235	0	0	0	1	0	0	0	0	0	0	0	0	0	1	23	43	8	7	1	0	0	1	0	1	1	1	2	2	92		Bacteria	Planctomycetes	Planctomycetia	Planctomycetales	Planctomycetaceae	Pirellula	Pirellula_staleyi
ASV_1361	0	0	0	18	6	10	12	0	10	0	15	8	4	7	2	0	0	0	0	0	0	0	0	0	0	0	0	0	92		Bacteria	Verrucomicrobia	Spartobacteria	Unassigned	Unassigned	Spartobacteria_genera_incertae_sedis	Unassigned
ASV_1412	0	23	0	2	6	14	7	2	11	2	5	9	7	3	0	1	0	0	0	0	0	0	0	0	0	0	0	0	92		Bacteria	Acidobacteria	Acidobacteria_Gp6	Unassigned	Unassigned	Gp6	Unassigned
ASV_1543	0	0	0	5	14	2	32	0	12	0	9	6	1	4	3	4	0	0	0	0	0	0	0	0	0	0	0	0	92		Bacteria	Acidobacteria	Acidobacteria_Gp4	Unassigned	Unassigned	Gp4	Unassigned
ASV_1549	0	0	0	10	0	5	4	32	3	8	6	13	1	6	3	0	0	1	0	0	0	0	0	0	0	0	0	0	92		Bacteria	Candidatus_Saccharibacteria	Unassigned	Unassigned	Unassigned	Saccharibacteria_genera_incertae_sedis	Unassigned
ASV_1634	0	0	1	10	3	8	2	45	0	9	6	4	0	4	0	0	0	0	0	0	0	0	0	0	0	0	0	0	92		Bacteria	Candidatus_Saccharibacteria	Unassigned	Unassigned	Unassigned	Saccharibacteria_genera_incertae_sedis	Unassigned
ASV_1677	1	0	0	0	2	6	0	59	1	1	4	14	3	0	0	1	0	0	0	0	0	0	0	0	0	0	0	0	92		Bacteria	Candidatus_Saccharibacteria	Unassigned	Unassigned	Unassigned	Saccharibacteria_genera_incertae_sedis	Unassigned
ASV_2318	0	2	0	3	13	5	36	0	8	0	6	2	2	7	3	3	1	0	1	0	0	0	0	0	0	0	0	0	92		Bacteria	Latescibacteria	Unassigned	Unassigned	Unassigned	Latescibacteria_genera_incertae_sedis	Unassigned
ASV_2341	0	34	0	5	4	0	1	0	3	7	14	7	2	10	2	3	0	0	0	0	0	0	0	0	0	0	0	0	92		Bacteria	Planctomycetes	Planctomycetia	Planctomycetales	Planctomycetaceae	Unassigned	Unassigned
ASV_2613	0	0	0	2	6	2	37	1	15	0	13	8	4	1	1	2	0	0	0	0	0	0	0	0	0	0	0	0	92		Bacteria	Acidobacteria	Acidobacteria_Gp7	Unassigned	Unassigned	Gp7	Unassigned
ASV_2671	2	0	0	2	4	4	2	1	21	5	10	22	5	5	4	4	0	1	0	0	0	0	0	0	0	0	0	0	92		Bacteria	Armatimonadetes	Unassigned	Unassigned	Unassigned	Armatimonadetes_gp2	Unassigned
ASV_2964	0	27	0	14	10	4	2	3	4	3	6	6	6	4	0	3	0	0	0	0	0	0	0	0	0	0	0	0	92		Bacteria	Verrucomicrobia	Unassigned	Unassigned	Unassigned	Unassigned	Unassigned
ASV_3087	2	21	0	7	5	4	3	35	0	1	8	5	0	1	0	0	0	0	0	0	0	0	0	0	0	0	0	0	92		Bacteria	Candidatus_Saccharibacteria	Unassigned	Unassigned	Unassigned	Saccharibacteria_genera_incertae_sedis	Unassigned
ASV_3176	4	2	0	2	1	27	0	4	8	12	8	3	0	11	10	0	0	0	0	0	0	0	0	0	0	0	0	0	92		Bacteria	Actinobacteria	Actinobacteria	Actinomycetales	Unassigned	Unassigned	Unassigned
ASV_3245	0	0	0	2	3	12	9	48	6	1	7	2	1	1	0	0	0	0	0	0	0	0	0	0	0	0	0	0	92		Bacteria	Chloroflexi	Thermomicrobia	Unassigned	Unassigned	Unassigned	Unassigned
ASV_3537	1	3	2	9	6	4	0	1	3	37	7	4	0	4	2	6	2	0	0	0	0	0	0	0	0	1	0	0	92		Bacteria	Proteobacteria	Alphaproteobacteria	Rhodobacterales	Rhodobacteraceae	Unassigned	Unassigned
ASV_3648	0	4	0	8	8	0	2	6	7	3	19	10	3	9	0	4	4	1	3	1	0	0	0	0	0	0	0	0	92		Bacteria	Verrucomicrobia	Spartobacteria	Unassigned	Unassigned	Spartobacteria_genera_incertae_sedis	Unassigned
ASV_4003	2	23	0	11	2	31	3	7	3	1	4	2	1	1	1	0	0	0	0	0	0	0	0	0	0	0	0	0	92		Bacteria	Candidatus_Saccharibacteria	Unassigned	Unassigned	Unassigned	Saccharibacteria_genera_incertae_sedis	Unassigned
ASV_4356	0	0	0	0	0	0	0	34	13	3	2	17	2	5	0	8	8	0	0	0	0	0	0	0	0	0	0	0	92		Bacteria	Acidobacteria	Acidobacteria_Gp6	Unassigned	Unassigned	Gp6	Unassigned
ASV_980	0	0	0	0	0	0	0	0	0	0	0	0	0	0	0	0	1	1	0	2	6	0	3	61	2	0	1	14	91		Bacteria	Proteobacteria	Alphaproteobacteria	Unassigned	Unassigned	Unassigned	Unassigned
ASV_1066	0	0	0	0	0	0	0	0	0	0	0	0	0	0	0	0	8	20	10	4	6	3	5	4	9	7	3	12	91		Bacteria	Chloroflexi	Caldilineae	Caldilineales	Caldilineaceae	Unassigned	Unassigned
ASV_1079	0	0	0	3	10	16	4	3	7	0	23	6	0	7	11	1	0	0	0	0	0	0	0	0	0	0	0	0	91		Bacteria	Verrucomicrobia	Unassigned	Unassigned	Unassigned	Unassigned	Unassigned
ASV_1228	2	8	1	8	10	9	6	11	8	1	12	11	1	3	0	0	0	0	0	0	0	0	0	0	0	0	0	0	91		Bacteria	Candidatus_Saccharibacteria	Unassigned	Unassigned	Unassigned	Saccharibacteria_genera_incertae_sedis	Unassigned
ASV_1258	4	1	1	1	0	0	1	0	0	0	0	0	0	1	5	0	40	0	1	1	5	7	2	3	0	1	4	13	91		Bacteria	Proteobacteria	Alphaproteobacteria	Caulobacterales	Caulobacteraceae	Phenylobacterium	Unassigned
ASV_1269	12	1	0	17	40	5	2	0	1	0	3	0	0	3	7	0	0	0	0	0	0	0	0	0	0	0	0	0	91		Bacteria	Bacteroidetes	Sphingobacteriia	Sphingobacteriales	Chitinophagaceae	Ferruginibacter	Ferruginibacter_yonginensis
ASV_1330	3	0	3	0	3	1	4	4	6	24	5	3	21	12	1	1	0	0	0	0	0	0	0	0	0	0	0	0	91		Bacteria	Verrucomicrobia	Verrucomicrobiae	Verrucomicrobiales	Verrucomicrobiaceae	Luteolibacter	Unassigned
ASV_1561	0	57	7	0	1	16	1	0	2	0	1	2	2	1	1	0	0	0	0	0	0	0	0	0	0	0	0	0	91		Bacteria	Parcubacteria	Unassigned	Unassigned	Unassigned	Parcubacteria_genera_incertae_sedis	Unassigned
ASV_1580	2	0	1	10	17	12	6	11	2	0	11	13	1	5	0	0	0	0	0	0	0	0	0	0	0	0	0	0	91		Bacteria	Candidatus_Saccharibacteria	Unassigned	Unassigned	Unassigned	Saccharibacteria_genera_incertae_sedis	Unassigned
ASV_1626	0	0	0	25	10	13	3	0	10	0	9	10	2	6	1	2	0	0	0	0	0	0	0	0	0	0	0	0	91		Bacteria	Acidobacteria	Acidobacteria_Gp4	Unassigned	Unassigned	Aridibacter	Aridibacter_famidurans
ASV_1655	0	0	0	1	3	8	1	1	16	2	16	17	13	9	0	0	1	0	3	0	0	0	0	0	0	0	0	0	91		Bacteria	Unassigned	Unassigned	Unassigned	Unassigned	Unassigned	Unassigned
ASV_1886	0	0	0	2	0	1	0	76	0	3	3	4	0	1	0	1	0	0	0	0	0	0	0	0	0	0	0	0	91		Bacteria	Candidatus_Saccharibacteria	Unassigned	Unassigned	Unassigned	Saccharibacteria_genera_incertae_sedis	Unassigned
ASV_1918	0	0	0	10	13	8	8	0	14	1	14	9	1	6	0	7	0	0	0	0	0	0	0	0	0	0	0	0	91		Bacteria	Acidobacteria	Acidobacteria_Gp4	Unassigned	Unassigned	Aridibacter	Aridibacter_famidurans
ASV_2154	0	28	0	1	7	3	35	0	6	0	2	4	0	2	0	3	0	0	0	0	0	0	0	0	0	0	0	0	91		Bacteria	Acidobacteria	Acidobacteria_Gp6	Unassigned	Unassigned	Gp6	Unassigned
ASV_2374	0	82	0	0	0	3	1	0	1	0	1	2	0	1	0	0	0	0	0	0	0	0	0	0	0	0	0	0	91		Bacteria	Parcubacteria	Unassigned	Unassigned	Unassigned	Parcubacteria_genera_incertae_sedis	Unassigned
ASV_2842	0	0	0	0	0	0	0	0	0	7	0	51	21	2	0	10	0	0	0	0	0	0	0	0	0	0	0	0	91		Bacteria	Proteobacteria	Betaproteobacteria	Burkholderiales	Burkholderiaceae	Unassigned	Unassigned
ASV_2844	0	0	0	14	7	2	32	2	4	0	12	9	2	3	2	2	0	0	0	0	0	0	0	0	0	0	0	0	91		Bacteria	Acidobacteria	Acidobacteria_Gp6	Unassigned	Unassigned	Gp6	Unassigned
ASV_3550	1	0	0	0	1	2	0	75	0	0	5	5	0	0	1	0	1	0	0	0	0	0	0	0	0	0	0	0	91		Bacteria	Candidatus_Saccharibacteria	Unassigned	Unassigned	Unassigned	Saccharibacteria_genera_incertae_sedis	Unassigned
ASV_4232	2	43	0	0	0	0	1	0	0	11	2	1	0	2	7	1	3	0	18	0	0	0	0	0	0	0	0	0	91		Bacteria	Firmicutes	Bacilli	Bacillales	Bacillaceae_1	Bacillus	Unassigned
ASV_4516	2	39	2	0	1	24	2	4	1	2	1	6	1	2	2	2	0	0	0	0	0	0	0	0	0	0	0	0	91		Bacteria	Parcubacteria	Unassigned	Unassigned	Unassigned	Parcubacteria_genera_incertae_sedis	Unassigned
ASV_5274	0	7	0	3	10	2	16	0	10	1	14	10	5	11	2	0	0	0	0	0	0	0	0	0	0	0	0	0	91		Bacteria	Acidobacteria	Acidobacteria_Gp4	Unassigned	Unassigned	Gp4	Unassigned
ASV_5286	4	0	0	4	5	8	1	0	23	5	4	18	10	9	0	0	0	0	0	0	0	0	0	0	0	0	0	0	91		Bacteria	Unassigned	Unassigned	Unassigned	Unassigned	Unassigned	Unassigned
ASV_5466	0	0	0	2	5	0	51	0	2	0	10	11	3	1	0	4	1	1	0	0	0	0	0	0	0	0	0	0	91		Bacteria	Unassigned	Unassigned	Unassigned	Unassigned	Unassigned	Unassigned
ASV_982	0	0	0	0	1	0	0	0	0	0	0	0	0	0	0	0	0	0	0	0	0	0	0	0	0	0	89	0	90		Bacteria	Candidatus_Saccharibacteria	Unassigned	Unassigned	Unassigned	Saccharibacteria_genera_incertae_sedis	Unassigned
ASV_1043	0	0	0	0	0	0	0	0	0	0	0	0	0	0	0	0	0	14	0	7	22	1	2	5	1	9	3	26	90		Bacteria	Planctomycetes	Planctomycetia	Planctomycetales	Planctomycetaceae	Blastopirellula	Blastopirellula_marina
ASV_1121	0	0	0	0	0	0	0	0	0	0	0	0	0	0	4	0	4	0	67	0	0	0	0	2	0	0	13	0	90		Bacteria	Proteobacteria	Alphaproteobacteria	Caulobacterales	Caulobacteraceae	Brevundimonas	Unassigned
ASV_1158	0	0	72	1	0	0	0	0	6	3	1	6	0	1	0	0	0	0	0	0	0	0	0	0	0	0	0	0	90		Bacteria	Candidatus_Saccharibacteria	Unassigned	Unassigned	Unassigned	Saccharibacteria_genera_incertae_sedis	Unassigned
ASV_1175	0	0	0	0	0	0	0	0	0	0	0	0	0	0	0	0	3	1	2	0	3	4	3	55	7	5	1	6	90		Bacteria	Actinobacteria	Actinobacteria	Actinomycetales	Microbacteriaceae	Pontimonas	Pontimonas_salivibrio
ASV_1321	1	0	0	0	1	0	0	1	0	1	0	0	0	0	1	1	1	1	1	0	3	2	0	75	0	0	0	1	90		Bacteria	Verrucomicrobia	Verrucomicrobiae	Verrucomicrobiales	Verrucomicrobiaceae	Luteolibacter	Unassigned
ASV_1406	0	8	0	1	25	22	2	0	11	1	5	6	1	4	0	4	0	0	0	0	0	0	0	0	0	0	0	0	90		Bacteria	Acidobacteria	Acidobacteria_Gp6	Unassigned	Unassigned	Gp6	Unassigned
ASV_1667	0	0	0	23	11	2	8	0	5	0	12	16	4	2	1	6	0	0	0	0	0	0	0	0	0	0	0	0	90		Bacteria	Acidobacteria	Acidobacteria_Gp4	Unassigned	Unassigned	Aridibacter	Aridibacter_famidurans
ASV_1727	2	2	0	5	9	4	1	3	5	18	8	5	5	12	1	4	2	1	2	0	0	0	1	0	0	0	0	0	90		Bacteria	Actinobacteria	Actinobacteria	Acidimicrobiales	Acidimicrobiaceae	Ilumatobacter	Ilumatobacter_fluminis
ASV_1753	1	0	0	20	4	5	3	3	7	3	17	11	6	4	2	4	0	0	0	0	0	0	0	0	0	0	0	0	90		Bacteria	Unassigned	Unassigned	Unassigned	Unassigned	Unassigned	Unassigned
ASV_1934	0	70	0	0	0	4	4	1	2	0	1	2	1	1	0	3	0	0	0	0	0	1	0	0	0	0	0	0	90		Bacteria	Parcubacteria	Unassigned	Unassigned	Unassigned	Parcubacteria_genera_incertae_sedis	Unassigned
ASV_1946	5	0	4	3	3	2	4	0	3	19	7	2	2	10	4	4	2	0	2	0	0	1	3	2	1	0	0	7	90		Bacteria	Proteobacteria	Alphaproteobacteria	Sphingomonadales	Erythrobacteraceae	Erythromicrobium	Erythromicrobium_ramosum
ASV_2069	1	1	0	0	1	0	0	0	0	0	0	0	0	0	1	0	0	0	0	0	5	9	0	0	0	0	6	66	90		Bacteria	Firmicutes	Bacilli	Bacillales	Planococcaceae	Unassigned	Unassigned
ASV_2910	0	1	0	6	6	13	9	0	16	3	13	14	0	2	3	3	1	0	0	0	0	0	0	0	0	0	0	0	90		Bacteria	Unassigned	Unassigned	Unassigned	Unassigned	Unassigned	Unassigned
ASV_3042	0	0	0	2	0	0	0	12	21	3	7	22	6	7	2	8	0	0	0	0	0	0	0	0	0	0	0	0	90		Bacteria	Acidobacteria	Acidobacteria_Gp6	Unassigned	Unassigned	Gp6	Unassigned
ASV_3197	0	0	0	4	2	3	5	9	7	4	15	19	7	4	0	7	0	0	0	1	0	0	0	0	0	0	2	1	90		Bacteria	Verrucomicrobia	Spartobacteria	Unassigned	Unassigned	Terrimicrobium	Terrimicrobium_sacchariphilum
ASV_3293	1	0	0	4	11	5	3	0	18	6	8	16	7	8	2	0	0	0	0	0	0	0	0	0	1	0	0	0	90		Bacteria	Acidobacteria	Acidobacteria_Gp7	Unassigned	Unassigned	Gp7	Unassigned
ASV_3375	0	0	0	10	8	16	16	2	6	1	9	10	5	5	0	2	0	0	0	0	0	0	0	0	0	0	0	0	90		Bacteria	Acidobacteria	Acidobacteria_Gp6	Unassigned	Unassigned	Gp6	Unassigned
ASV_3870	0	0	0	15	11	8	11	2	4	0	16	5	2	5	4	7	0	0	0	0	0	0	0	0	0	0	0	0	90		Bacteria	candidate_division_WPS-1	Unassigned	Unassigned	Unassigned	WPS-1_genera_incertae_sedis	Unassigned
ASV_4148	3	0	0	7	1	3	5	6	7	1	33	19	1	4	0	0	0	0	0	0	0	0	0	0	0	0	0	0	90		Bacteria	Candidatus_Saccharibacteria	Unassigned	Unassigned	Unassigned	Saccharibacteria_genera_incertae_sedis	Unassigned
ASV_4364	0	0	0	14	10	23	4	0	10	0	14	2	3	7	2	1	0	0	0	0	0	0	0	0	0	0	0	0	90		Bacteria	Actinobacteria	Actinobacteria	Unassigned	Unassigned	Unassigned	Unassigned
ASV_4671	1	14	0	3	9	11	11	0	15	0	7	10	2	5	1	0	1	0	0	0	0	0	0	0	0	0	0	0	90		Bacteria	Acidobacteria	Acidobacteria_Gp6	Unassigned	Unassigned	Gp6	Unassigned
ASV_1188	7	8	0	0	10	11	0	1	3	0	3	1	0	6	39	0	0	0	0	0	0	0	0	0	0	0	0	0	89		Bacteria	Proteobacteria	Betaproteobacteria	Burkholderiales	Oxalobacteraceae	Massilia	Unassigned
ASV_1197	2	4	4	1	2	7	4	1	4	3	3	3	16	0	0	18	1	0	0	0	0	0	0	0	0	1	15	0	89		Bacteria	Proteobacteria	Betaproteobacteria	Burkholderiales	Comamonadaceae	Unassigned	Unassigned
ASV_1262	3	0	6	29	3	1	0	0	6	14	1	5	10	3	0	7	0	0	0	0	0	0	0	0	0	0	0	1	89		Bacteria	Proteobacteria	Betaproteobacteria	Burkholderiales	Comamonadaceae	Unassigned	Unassigned
ASV_1284	0	0	0	0	0	0	1	3	11	7	34	15	7	11	0	0	0	0	0	0	0	0	0	0	0	0	0	0	89		Bacteria	Unassigned	Unassigned	Unassigned	Unassigned	Unassigned	Unassigned
ASV_1290	23	2	0	6	2	25	1	0	0	5	7	1	3	14	0	0	0	0	0	0	0	0	0	0	0	0	0	0	89		Bacteria	Proteobacteria	Alphaproteobacteria	Sphingomonadales	Sphingomonadaceae	Unassigned	Unassigned
ASV_1724	1	5	0	6	5	8	2	0	4	0	15	16	0	7	2	1	16	0	0	0	1	0	0	0	0	0	0	0	89		Bacteria	Actinobacteria	Actinobacteria	Unassigned	Unassigned	Unassigned	Unassigned
ASV_1814	16	2	0	14	10	12	1	0	4	13	2	2	4	3	1	0	0	0	0	0	0	0	0	0	5	0	0	0	89		Bacteria	Actinobacteria	Actinobacteria	Actinomycetales	Nocardioidaceae	Nocardioides	Nocardioides_caricicola
ASV_1883	0	82	0	0	1	2	0	0	1	0	0	2	0	1	0	0	0	0	0	0	0	0	0	0	0	0	0	0	89		Bacteria	Parcubacteria	Unassigned	Unassigned	Unassigned	Parcubacteria_genera_incertae_sedis	Unassigned
ASV_2110	0	0	0	0	2	11	1	0	0	2	37	32	1	3	0	0	0	0	0	0	0	0	0	0	0	0	0	0	89		Bacteria	Candidatus_Saccharibacteria	Unassigned	Unassigned	Unassigned	Saccharibacteria_genera_incertae_sedis	Unassigned
ASV_2117	6	20	0	5	2	7	3	19	2	1	7	16	0	0	1	0	0	0	0	0	0	0	0	0	0	0	0	0	89		Bacteria	Candidatus_Saccharibacteria	Unassigned	Unassigned	Unassigned	Saccharibacteria_genera_incertae_sedis	Unassigned
ASV_2157	0	0	2	4	0	5	0	9	15	13	9	22	4	3	0	1	0	2	0	0	0	0	0	0	0	0	0	0	89		Bacteria	Candidatus_Saccharibacteria	Unassigned	Unassigned	Unassigned	Saccharibacteria_genera_incertae_sedis	Unassigned
ASV_2313	0	0	0	1	5	3	0	1	44	8	3	12	1	7	0	1	3	0	0	0	0	0	0	0	0	0	0	0	89		Archaea	Euryarchaeota	Methanomicrobia	Methanomicrobiales	Unassigned	Unassigned	Unassigned
ASV_3096	0	0	0	14	7	21	7	1	6	3	15	8	0	6	0	1	0	0	0	0	0	0	0	0	0	0	0	0	89		Bacteria	Acidobacteria	Acidobacteria_Gp4	Unassigned	Unassigned	Aridibacter	Aridibacter_famidurans
ASV_3165	0	2	0	1	6	3	48	0	16	0	4	6	0	2	0	1	0	0	0	0	0	0	0	0	0	0	0	0	89		Bacteria	Acidobacteria	Acidobacteria_Gp6	Unassigned	Unassigned	Gp6	Unassigned
ASV_3717	37	5	1	0	0	5	1	1	3	6	4	3	19	0	2	2	0	0	0	0	0	0	0	0	0	0	0	0	89		Bacteria	Parcubacteria	Unassigned	Unassigned	Unassigned	Parcubacteria_genera_incertae_sedis	Unassigned
ASV_3810	0	0	0	0	1	0	75	0	4	0	4	3	1	1	0	0	0	0	0	0	0	0	0	0	0	0	0	0	89		Bacteria	Actinobacteria	Actinobacteria	Unassigned	Unassigned	Unassigned	Unassigned
ASV_4090	1	0	1	7	9	10	4	0	21	10	1	12	4	4	3	2	0	0	0	0	0	0	0	0	0	0	0	0	89		Bacteria	Candidatus_Saccharibacteria	Unassigned	Unassigned	Unassigned	Saccharibacteria_genera_incertae_sedis	Unassigned
ASV_4106	0	0	0	3	6	4	27	1	9	0	10	8	4	6	1	9	1	0	0	0	0	0	0	0	0	0	0	0	89		Bacteria	Acidobacteria	Acidobacteria_Gp6	Unassigned	Unassigned	Gp6	Unassigned
ASV_4337	0	0	0	2	7	14	0	1	11	1	21	9	4	13	4	2	0	0	0	0	0	0	0	0	0	0	0	0	89		Bacteria	Acidobacteria	Acidobacteria_Gp4	Unassigned	Unassigned	Aridibacter	Aridibacter_famidurans
ASV_5025	14	0	1	1	0	1	1	35	0	7	12	3	4	5	5	0	0	0	0	0	0	0	0	0	0	0	0	0	89		Bacteria	Parcubacteria	Unassigned	Unassigned	Unassigned	Parcubacteria_genera_incertae_sedis	Unassigned
ASV_5041	0	0	0	14	10	6	9	9	6	0	11	8	2	5	7	2	0	0	0	0	0	0	0	0	0	0	0	0	89		Bacteria	candidate_division_WPS-1	Unassigned	Unassigned	Unassigned	WPS-1_genera_incertae_sedis	Unassigned
ASV_5342	0	0	0	5	12	5	22	1	18	0	5	12	3	3	0	3	0	0	0	0	0	0	0	0	0	0	0	0	89		Bacteria	Acidobacteria	Acidobacteria_Gp6	Unassigned	Unassigned	Gp6	Unassigned
ASV_967	0	0	0	0	0	0	0	0	0	0	0	0	0	1	81	0	0	0	0	3	1	1	0	0	0	0	1	0	88		Bacteria	Deinococcus-Thermus	Deinococci	Deinococcales	Deinococcaceae	Deinococcus	Deinococcus_depolymerans
ASV_997	0	0	1	0	0	0	0	0	0	1	2	1	2	2	0	17	1	0	3	5	13	2	11	8	7	2	0	10	88		Bacteria	Bacteroidetes	Sphingobacteriia	Sphingobacteriales	Chitinophagaceae	Terrimonas	Unassigned
ASV_1135	18	1	0	0	0	6	1	0	0	0	4	0	0	12	45	0	0	0	0	0	0	0	0	0	0	0	0	1	88		Bacteria	Proteobacteria	Alphaproteobacteria	Caulobacterales	Caulobacteraceae	Brevundimonas	Unassigned
ASV_1293	34	0	0	2	0	0	0	0	0	0	1	0	0	4	47	0	0	0	0	0	0	0	0	0	0	0	0	0	88		Bacteria	Actinobacteria	Actinobacteria	Actinomycetales	Micrococcaceae	Arthrobacter	Unassigned
ASV_1306	1	0	0	13	2	54	0	0	3	1	5	5	1	3	0	0	0	0	0	0	0	0	0	0	0	0	0	0	88		Bacteria	Candidatus_Saccharibacteria	Unassigned	Unassigned	Unassigned	Saccharibacteria_genera_incertae_sedis	Unassigned
ASV_1417	0	59	0	7	4	11	0	0	0	0	3	4	0	0	0	0	0	0	0	0	0	0	0	0	0	0	0	0	88		Bacteria	Candidatus_Saccharibacteria	Unassigned	Unassigned	Unassigned	Saccharibacteria_genera_incertae_sedis	Unassigned
ASV_1422	2	35	0	13	4	17	2	5	4	0	0	3	1	0	1	1	0	0	0	0	0	0	0	0	0	0	0	0	88		Bacteria	Candidatus_Saccharibacteria	Unassigned	Unassigned	Unassigned	Saccharibacteria_genera_incertae_sedis	Unassigned
ASV_1433	0	0	0	0	0	0	3	3	0	0	1	1	0	0	3	0	0	0	65	0	0	0	0	0	0	0	12	0	88		Bacteria	Planctomycetes	Planctomycetia	Planctomycetales	Planctomycetaceae	Unassigned	Unassigned
ASV_1633	3	0	0	0	0	0	0	7	2	41	3	7	18	3	4	0	0	0	0	0	0	0	0	0	0	0	0	0	88		Bacteria	Parcubacteria	Unassigned	Unassigned	Unassigned	Parcubacteria_genera_incertae_sedis	Unassigned
ASV_1669	29	1	0	27	11	8	0	0	0	1	2	1	0	7	1	0	0	0	0	0	0	0	0	0	0	0	0	0	88		Bacteria	Proteobacteria	Alphaproteobacteria	Sphingomonadales	Sphingomonadaceae	Sphingomonas	Unassigned
ASV_2036	4	0	0	13	5	36	3	10	3	0	6	0	3	2	2	1	0	0	0	0	0	0	0	0	0	0	0	0	88		Bacteria	Candidatus_Saccharibacteria	Unassigned	Unassigned	Unassigned	Saccharibacteria_genera_incertae_sedis	Unassigned
ASV_2033	0	7	0	1	4	22	2	8	7	2	14	6	1	12	0	1	0	0	1	0	0	0	0	0	0	0	0	0	88		Bacteria	Actinobacteria	Actinobacteria	Unassigned	Unassigned	Unassigned	Unassigned
ASV_2059	50	24	4	0	0	4	1	0	0	0	1	2	0	0	1	1	0	0	0	0	0	0	0	0	0	0	0	0	88		Bacteria	Parcubacteria	Unassigned	Unassigned	Unassigned	Parcubacteria_genera_incertae_sedis	Unassigned
ASV_2099	0	0	5	3	2	0	1	28	2	12	10	11	3	1	1	0	1	2	5	1	0	0	0	0	0	0	0	0	88		Bacteria	Candidatus_Saccharibacteria	Unassigned	Unassigned	Unassigned	Saccharibacteria_genera_incertae_sedis	Unassigned
ASV_2425	0	1	0	7	4	0	18	0	8	1	11	10	8	15	1	4	0	0	0	0	0	0	0	0	0	0	0	0	88		Bacteria	Actinobacteria	Unassigned	Unassigned	Unassigned	Unassigned	Unassigned
ASV_2616	0	7	0	4	8	10	16	1	18	0	10	4	0	5	0	5	0	0	0	0	0	0	0	0	0	0	0	0	88		Bacteria	Acidobacteria	Acidobacteria_Gp6	Unassigned	Unassigned	Gp6	Unassigned
ASV_3036	1	15	0	5	12	5	17	4	3	0	16	3	0	2	3	2	0	0	0	0	0	0	0	0	0	0	0	0	88		Bacteria	Actinobacteria	Actinobacteria	Unassigned	Unassigned	Unassigned	Unassigned
ASV_3805	1	42	0	1	4	7	21	0	2	1	7	2	0	0	0	0	0	0	0	0	0	0	0	0	0	0	0	0	88		Bacteria	Unassigned	Unassigned	Unassigned	Unassigned	Unassigned	Unassigned
ASV_4877	0	0	0	0	1	0	0	72	1	0	1	3	1	0	0	0	8	0	1	0	0	0	0	0	0	0	0	0	88		Bacteria	Chloroflexi	Caldilineae	Caldilineales	Caldilineaceae	Caldilinea	Caldilinea_tarbellica
ASV_4985	0	0	0	12	7	10	0	3	10	2	12	14	5	6	1	5	0	0	1	0	0	0	0	0	0	0	0	0	88		Bacteria	Unassigned	Unassigned	Unassigned	Unassigned	Unassigned	Unassigned
ASV_5666	0	0	0	4	5	11	8	6	13	3	8	17	3	7	1	1	0	0	1	0	0	0	0	0	0	0	0	0	88		Bacteria	Acidobacteria	Acidobacteria_Gp6	Unassigned	Unassigned	Gp6	Unassigned
ASV_5782	3	13	1	12	4	3	2	5	6	8	12	5	2	2	9	1	0	0	0	0	0	0	0	0	0	0	0	0	88		Bacteria	Candidatus_Saccharibacteria	Unassigned	Unassigned	Unassigned	Saccharibacteria_genera_incertae_sedis	Unassigned
ASV_1095	0	0	44	0	0	0	2	3	5	1	10	10	1	2	8	0	1	0	0	0	0	0	0	0	0	0	0	0	87		Bacteria	Parcubacteria	Unassigned	Unassigned	Unassigned	Parcubacteria_genera_incertae_sedis	Unassigned
ASV_1177	0	0	0	0	0	0	0	0	0	1	0	0	0	1	65	0	0	1	0	13	0	0	0	0	0	4	1	1	87		Bacteria	Deinococcus-Thermus	Deinococci	Deinococcales	Deinococcaceae	Deinococcus	Deinococcus_depolymerans
ASV_1193	0	66	0	0	0	0	0	0	0	0	0	0	0	0	4	0	1	1	0	0	0	0	0	0	0	0	0	15	87		Bacteria	Firmicutes	Bacilli	Lactobacillales	Carnobacteriaceae	Carnobacterium	Unassigned
ASV_1204	0	0	0	0	0	0	0	0	0	0	0	2	0	0	18	66	0	0	1	0	0	0	0	0	0	0	0	0	87		Bacteria	Verrucomicrobia	Verrucomicrobiae	Verrucomicrobiales	Verrucomicrobiaceae	Prosthecobacter	Prosthecobacter_algae
ASV_1210	12	0	0	12	16	9	0	0	0	3	3	0	0	8	23	1	0	0	0	0	0	0	0	0	0	0	0	0	87		Bacteria	Proteobacteria	Alphaproteobacteria	Sphingomonadales	Sphingomonadaceae	Sphingorhabdus	Sphingorhabdus_planktonica
ASV_1251	9	1	0	5	47	21	1	0	1	0	2	0	0	0	0	0	0	0	0	0	0	0	0	0	0	0	0	0	87		Bacteria	Proteobacteria	Betaproteobacteria	Burkholderiales	Comamonadaceae	Polaromonas	Unassigned
ASV_1337	0	41	0	0	1	7	0	0	6	7	5	10	0	10	0	0	0	0	0	0	0	0	0	0	0	0	0	0	87		Bacteria	Candidatus_Saccharibacteria	Unassigned	Unassigned	Unassigned	Saccharibacteria_genera_incertae_sedis	Unassigned
ASV_1404	0	4	0	13	14	4	3	0	14	1	12	9	2	7	1	3	0	0	0	0	0	0	0	0	0	0	0	0	87		Bacteria	Verrucomicrobia	Verrucomicrobiae	Verrucomicrobiales	Verrucomicrobiaceae	Unassigned	Unassigned
ASV_1591	3	8	0	2	2	2	0	59	1	0	2	4	0	1	2	1	0	0	0	0	0	0	0	0	0	0	0	0	87		Bacteria	Candidatus_Saccharibacteria	Unassigned	Unassigned	Unassigned	Saccharibacteria_genera_incertae_sedis	Unassigned
ASV_1592	1	38	0	10	15	2	1	0	10	4	2	0	0	3	0	1	0	0	0	0	0	0	0	0	0	0	0	0	87		Bacteria	Proteobacteria	Betaproteobacteria	Burkholderiales	Oxalobacteraceae	Unassigned	Unassigned
ASV_1689	0	0	2	1	1	0	0	0	0	0	0	0	0	3	67	0	0	1	0	0	0	0	0	0	0	0	12	0	87		Bacteria	Proteobacteria	Alphaproteobacteria	Sphingomonadales	Sphingomonadaceae	Sphingopyxis	Sphingopyxis_soli
ASV_1703	1	0	0	3	1	6	1	48	0	4	6	15	0	1	0	1	0	0	0	0	0	0	0	0	0	0	0	0	87		Bacteria	Candidatus_Saccharibacteria	Unassigned	Unassigned	Unassigned	Saccharibacteria_genera_incertae_sedis	Unassigned
ASV_1714	0	0	3	2	3	1	0	21	1	12	13	12	1	4	6	2	1	3	2	0	0	0	0	0	0	0	0	0	87		Bacteria	Unassigned	Unassigned	Unassigned	Unassigned	Unassigned	Unassigned
ASV_1971	0	0	0	14	10	12	6	1	4	3	10	5	2	15	4	1	0	0	0	0	0	0	0	0	0	0	0	0	87		Bacteria	Verrucomicrobia	Spartobacteria	Unassigned	Unassigned	Spartobacteria_genera_incertae_sedis	Unassigned
ASV_2083	1	8	0	24	5	21	3	0	6	2	3	4	0	6	3	1	0	0	0	0	0	0	0	0	0	0	0	0	87		Bacteria	Unassigned	Unassigned	Unassigned	Unassigned	Unassigned	Unassigned
ASV_2322	0	0	0	31	15	0	0	0	2	1	26	10	1	1	0	0	0	0	0	0	0	0	0	0	0	0	0	0	87		Bacteria	Verrucomicrobia	Verrucomicrobiae	Verrucomicrobiales	Verrucomicrobiaceae	Unassigned	Unassigned
ASV_2587	0	0	0	1	0	4	0	0	0	0	1	0	0	0	0	0	1	0	0	0	0	80	0	0	0	0	0	0	87		Bacteria	Candidatus_Saccharibacteria	Unassigned	Unassigned	Unassigned	Saccharibacteria_genera_incertae_sedis	Unassigned
ASV_2707	0	0	0	4	11	28	10	0	11	3	6	2	1	9	0	2	0	0	0	0	0	0	0	0	0	0	0	0	87		Bacteria	Acidobacteria	Acidobacteria_Gp4	Unassigned	Unassigned	Aridibacter	Aridibacter_famidurans
ASV_2740	3	24	0	10	8	14	0	0	4	5	3	1	1	3	11	0	0	0	0	0	0	0	0	0	0	0	0	0	87		Bacteria	Actinobacteria	Actinobacteria	Actinomycetales	Unassigned	Unassigned	Unassigned
ASV_3279	2	39	0	6	0	3	2	12	0	3	15	4	0	0	1	0	0	0	0	0	0	0	0	0	0	0	0	0	87		Bacteria	Candidatus_Saccharibacteria	Unassigned	Unassigned	Unassigned	Saccharibacteria_genera_incertae_sedis	Unassigned
ASV_3930	61	2	0	0	1	2	1	0	1	5	3	2	1	4	4	0	0	0	0	0	0	0	0	0	0	0	0	0	87		Bacteria	Proteobacteria	Alphaproteobacteria	Sphingomonadales	Sphingomonadaceae	Sphingomonas	Sphingomonas_glacialis
ASV_4431	1	0	0	16	19	0	3	1	8	3	18	7	3	6	0	1	0	0	1	0	0	0	0	0	0	0	0	0	87		Bacteria	Verrucomicrobia	Spartobacteria	Unassigned	Unassigned	Spartobacteria_genera_incertae_sedis	Unassigned
ASV_4448	1	0	2	2	41	13	1	0	1	6	3	2	11	2	0	2	0	0	0	0	0	0	0	0	0	0	0	0	87		Bacteria	Proteobacteria	Betaproteobacteria	Burkholderiales	Comamonadaceae	Unassigned	Unassigned
ASV_4881	0	0	0	5	4	3	2	23	3	3	8	8	3	11	0	4	1	0	1	0	0	0	0	0	0	0	8	0	87		Bacteria	Planctomycetes	Planctomycetia	Planctomycetales	Planctomycetaceae	Unassigned	Unassigned
ASV_5400	2	0	0	0	2	5	3	44	2	6	5	15	0	2	0	1	0	0	0	0	0	0	0	0	0	0	0	0	87		Bacteria	Candidatus_Saccharibacteria	Unassigned	Unassigned	Unassigned	Saccharibacteria_genera_incertae_sedis	Unassigned
ASV_5953	0	0	0	0	0	0	0	0	1	4	5	50	18	3	1	4	1	0	0	0	0	0	0	0	0	0	0	0	87		Bacteria	Proteobacteria	Betaproteobacteria	Burkholderiales	Burkholderiaceae	Unassigned	Unassigned
ASV_5956	0	3	0	18	14	15	6	3	6	0	11	4	3	1	2	0	0	1	0	0	0	0	0	0	0	0	0	0	87		Bacteria	candidate_division_WPS-1	Unassigned	Unassigned	Unassigned	WPS-1_genera_incertae_sedis	Unassigned
ASV_1011	14	5	0	13	0	20	7	0	3	0	16	3	1	3	0	0	0	1	0	0	0	0	0	0	0	0	0	0	86		Bacteria	Parcubacteria	Unassigned	Unassigned	Unassigned	Parcubacteria_genera_incertae_sedis	Unassigned
ASV_1249	10	0	0	5	0	1	0	1	0	10	9	1	0	25	23	1	0	0	0	0	0	0	0	0	0	0	0	0	86		Bacteria	Bacteroidetes	Cytophagia	Cytophagales	Cytophagaceae	Hymenobacter	Unassigned
ASV_1282	0	0	0	1	64	3	10	0	7	0	0	0	0	1	0	0	0	0	0	0	0	0	0	0	0	0	0	0	86		Archaea	Thaumarchaeota	Unassigned	Nitrososphaerales	Nitrososphaeraceae	Nitrososphaera	Unassigned
ASV_1289	0	55	0	0	0	26	0	0	1	0	0	2	0	1	0	1	0	0	0	0	0	0	0	0	0	0	0	0	86		Bacteria	Parcubacteria	Unassigned	Unassigned	Unassigned	Parcubacteria_genera_incertae_sedis	Unassigned
ASV_1368	0	0	0	0	0	0	0	0	0	0	0	1	5	1	0	62	15	2	0	0	0	0	0	0	0	0	0	0	86		Bacteria	Verrucomicrobia	Verrucomicrobiae	Verrucomicrobiales	Verrucomicrobiaceae	Unassigned	Unassigned
ASV_1620	1	0	0	0	0	2	0	0	0	14	0	0	0	1	0	2	1	0	2	59	1	1	0	1	0	0	1	0	86		Bacteria	Firmicutes	Bacilli	Bacillales	Bacillales_Incertae_Sedis_XII	Exiguobacterium	Exiguobacterium_mexicanum
ASV_1635	7	3	0	23	11	20	1	0	3	1	4	2	2	3	3	2	1	0	0	0	0	0	0	0	0	0	0	0	86		Bacteria	Proteobacteria	Alphaproteobacteria	Sphingomonadales	Sphingomonadaceae	Sphingomonas	Unassigned
ASV_1695	1	6	0	5	8	5	2	7	9	0	13	10	2	9	4	3	1	0	0	0	0	0	1	0	0	0	0	0	86		Bacteria	Actinobacteria	Actinobacteria	Unassigned	Unassigned	Unassigned	Unassigned
ASV_1840	16	0	0	13	3	8	0	10	0	2	6	4	0	16	8	0	0	0	0	0	0	0	0	0	0	0	0	0	86		Bacteria	Bacteroidetes	Cytophagia	Cytophagales	Cytophagaceae	Hymenobacter	Hymenobacter_tibetensis
ASV_1960	0	0	0	4	10	11	30	0	8	0	11	7	1	3	0	1	0	0	0	0	0	0	0	0	0	0	0	0	86		Bacteria	Chloroflexi	Caldilineae	Caldilineales	Caldilineaceae	Unassigned	Unassigned
ASV_2056	1	0	0	4	2	9	1	35	0	1	8	19	2	3	0	1	0	0	0	0	0	0	0	0	0	0	0	0	86		Bacteria	Candidatus_Saccharibacteria	Unassigned	Unassigned	Unassigned	Saccharibacteria_genera_incertae_sedis	Unassigned
ASV_2091	1	0	0	3	4	48	2	1	13	0	5	3	0	6	0	0	0	0	0	0	0	0	0	0	0	0	0	0	86		Bacteria	Acidobacteria	Acidobacteria_Gp6	Unassigned	Unassigned	Gp6	Unassigned
ASV_2166	0	54	1	0	0	20	1	0	1	1	2	0	0	2	2	2	0	0	0	0	0	0	0	0	0	0	0	0	86		Bacteria	Parcubacteria	Unassigned	Unassigned	Unassigned	Parcubacteria_genera_incertae_sedis	Unassigned
ASV_2399	1	0	0	13	45	3	5	0	2	1	8	2	1	2	0	2	1	0	0	0	0	0	0	0	0	0	0	0	86		Bacteria	Bacteroidetes	Sphingobacteriia	Sphingobacteriales	Chitinophagaceae	Unassigned	Unassigned
ASV_2699	0	0	0	2	7	3	0	0	54	0	5	6	0	6	0	0	3	0	0	0	0	0	0	0	0	0	0	0	86		Archaea	Unassigned	Unassigned	Unassigned	Unassigned	Unassigned	Unassigned
ASV_3868	2	0	0	10	5	53	4	0	3	0	2	5	0	1	1	0	0	0	0	0	0	0	0	0	0	0	0	0	86		Bacteria	Candidatus_Saccharibacteria	Unassigned	Unassigned	Unassigned	Saccharibacteria_genera_incertae_sedis	Unassigned
ASV_4102	0	0	0	10	16	3	8	0	11	2	12	13	5	6	0	0	0	0	0	0	0	0	0	0	0	0	0	0	86		Bacteria	Acidobacteria	Acidobacteria_Gp6	Unassigned	Unassigned	Gp6	Unassigned
ASV_1078	0	0	0	0	0	0	0	0	0	0	0	0	0	0	0	1	2	1	5	1	8	0	33	6	12	6	8	2	85		Bacteria	Bacteroidetes	Unassigned	Unassigned	Unassigned	Unassigned	Unassigned
ASV_1189	0	25	0	0	0	41	1	1	1	1	4	2	3	1	0	5	0	0	0	0	0	0	0	0	0	0	0	0	85		Bacteria	Parcubacteria	Unassigned	Unassigned	Unassigned	Parcubacteria_genera_incertae_sedis	Unassigned
ASV_1256	0	0	0	0	0	0	0	0	0	0	0	0	0	0	0	0	8	13	20	1	7	14	4	2	4	4	3	5	85		Bacteria	Planctomycetes	Planctomycetia	Planctomycetales	Planctomycetaceae	Unassigned	Unassigned
ASV_1295	0	4	1	22	3	8	5	10	4	1	13	8	1	1	0	0	0	1	3	0	0	0	0	0	0	0	0	0	85		Bacteria	Candidatus_Saccharibacteria	Unassigned	Unassigned	Unassigned	Saccharibacteria_genera_incertae_sedis	Unassigned
ASV_1305	27	0	0	3	11	2	0	1	2	12	6	4	5	11	1	0	0	0	0	0	0	0	0	0	0	0	0	0	85		Bacteria	Proteobacteria	Alphaproteobacteria	Sphingomonadales	Sphingomonadaceae	Parablastomonas	Parablastomonas_arctica
ASV_1319	0	0	0	1	0	0	0	0	1	2	0	4	0	2	3	2	1	3	3	0	0	0	60	0	3	0	0	0	85		Bacteria	Candidatus_Saccharibacteria	Unassigned	Unassigned	Unassigned	Saccharibacteria_genera_incertae_sedis	Unassigned
ASV_1402	0	0	0	3	5	13	15	1	12	0	7	13	0	9	5	2	0	0	0	0	0	0	0	0	0	0	0	0	85		Bacteria	Unassigned	Unassigned	Unassigned	Unassigned	Unassigned	Unassigned
ASV_1424	59	9	0	0	0	1	1	0	1	0	0	3	0	3	8	0	0	0	0	0	0	0	0	0	0	0	0	0	85		Bacteria	Proteobacteria	Alphaproteobacteria	Sphingomonadales	Sphingomonadaceae	Sphingomonas	Unassigned
ASV_1435	4	0	1	3	0	59	0	0	1	10	1	0	3	1	0	0	0	0	1	0	0	0	0	0	0	0	1	0	85		Bacteria	Actinobacteria	Actinobacteria	Actinomycetales	Microbacteriaceae	Microbacterium	Microbacterium_aerolatum
ASV_1582	0	5	0	5	19	7	10	1	17	0	4	7	0	3	2	4	1	0	0	0	0	0	0	0	0	0	0	0	85		Bacteria	Acidobacteria	Acidobacteria_Gp6	Unassigned	Unassigned	Gp6	Unassigned
ASV_1765	1	37	0	4	3	3	7	0	1	1	7	9	9	1	0	2	0	0	0	0	0	0	0	0	0	0	0	0	85		Bacteria	Armatimonadetes	Armatimonadia	Armatimonadales	Armatimonadaceae	Armatimonas/Armatimonadetes_gp1	Unassigned
ASV_1789	0	0	0	10	16	7	2	6	6	2	8	9	1	12	3	3	0	0	0	0	0	0	0	0	0	0	0	0	85		Bacteria	Verrucomicrobia	Spartobacteria	Unassigned	Unassigned	Unassigned	Unassigned
ASV_2068	20	8	0	4	0	6	0	0	0	5	2	0	3	8	0	2	0	0	0	1	0	2	1	16	3	4	0	0	85		Bacteria	Actinobacteria	Actinobacteria	Actinomycetales	Nocardioidaceae	Nocardioides	Unassigned
ASV_2278	0	26	0	23	3	6	5	0	2	2	4	6	1	2	2	3	0	0	0	0	0	0	0	0	0	0	0	0	85		Bacteria	Acidobacteria	Acidobacteria_Gp4	Unassigned	Unassigned	Aridibacter	Aridibacter_famidurans
ASV_2286	2	32	0	8	3	5	3	2	2	3	16	6	1	0	1	1	0	0	0	0	0	0	0	0	0	0	0	0	85		Bacteria	Candidatus_Saccharibacteria	Unassigned	Unassigned	Unassigned	Saccharibacteria_genera_incertae_sedis	Unassigned
ASV_2284	27	12	0	12	5	0	0	0	1	4	4	0	1	15	4	0	0	0	0	0	0	0	0	0	0	0	0	0	85		Bacteria	Proteobacteria	Betaproteobacteria	Burkholderiales	Oxalobacteraceae	Unassigned	Unassigned
ASV_2810	0	0	0	19	7	0	0	3	11	2	18	15	2	6	1	1	0	0	0	0	0	0	0	0	0	0	0	0	85		Bacteria	Acidobacteria	Acidobacteria_Gp4	Unassigned	Unassigned	Aridibacter	Aridibacter_famidurans
ASV_2913	0	0	43	0	0	0	0	14	11	6	2	5	3	0	0	1	0	0	0	0	0	0	0	0	0	0	0	0	85		Bacteria	SR1	Unassigned	Unassigned	Unassigned	SR1_genera_incertae_sedis	Unassigned
ASV_2937	0	0	0	3	4	17	3	2	9	14	14	16	2	0	1	0	0	0	0	0	0	0	0	0	0	0	0	0	85		Bacteria	Candidatus_Saccharibacteria	Unassigned	Unassigned	Unassigned	Saccharibacteria_genera_incertae_sedis	Unassigned
ASV_3089	0	9	0	9	12	5	11	3	6	0	10	7	2	5	2	2	2	0	0	0	0	0	0	0	0	0	0	0	85		Bacteria	Acidobacteria	Acidobacteria_Gp6	Unassigned	Unassigned	Gp6	Unassigned
ASV_3416	4	0	0	0	0	0	0	1	0	0	0	0	0	1	79	0	0	0	0	0	0	0	0	0	0	0	0	0	85		Bacteria	Proteobacteria	Alphaproteobacteria	Caulobacterales	Caulobacteraceae	Asticcacaulis	Unassigned
ASV_3661	0	0	1	16	6	3	5	8	11	8	4	11	5	7	0	0	0	0	0	0	0	0	0	0	0	0	0	0	85		Bacteria	Candidatus_Saccharibacteria	Unassigned	Unassigned	Unassigned	Saccharibacteria_genera_incertae_sedis	Unassigned
ASV_4658	1	5	0	2	5	9	25	0	8	1	5	15	2	4	0	2	1	0	0	0	0	0	0	0	0	0	0	0	85		Bacteria	Acidobacteria	Acidobacteria_Gp6	Unassigned	Unassigned	Gp6	Unassigned
ASV_4772	2	68	0	1	0	8	0	0	1	0	1	0	2	0	1	1	0	0	0	0	0	0	0	0	0	0	0	0	85		Bacteria	Parcubacteria	Unassigned	Unassigned	Unassigned	Parcubacteria_genera_incertae_sedis	Unassigned
ASV_5091	0	5	0	11	12	13	3	0	13	1	10	4	2	8	0	3	0	0	0	0	0	0	0	0	0	0	0	0	85		Bacteria	Verrucomicrobia	Verrucomicrobiae	Verrucomicrobiales	Verrucomicrobiaceae	Unassigned	Unassigned
ASV_1168	30	0	0	2	1	10	0	2	0	14	3	2	0	19	1	0	0	0	0	0	0	0	0	0	0	0	0	0	84		Bacteria	Proteobacteria	Alphaproteobacteria	Sphingomonadales	Sphingomonadaceae	Sphingomonas	Unassigned
ASV_1250	44	0	0	0	2	34	0	0	0	3	0	0	1	0	0	0	0	0	0	0	0	0	0	0	0	0	0	0	84		Bacteria	Proteobacteria	Gammaproteobacteria	Pseudomonadales	Moraxellaceae	Acinetobacter	Unassigned
ASV_1317	0	0	0	0	0	0	0	0	6	18	13	23	10	1	0	4	2	7	0	0	0	0	0	0	0	0	0	0	84		Bacteria	Candidatus_Saccharibacteria	Unassigned	Unassigned	Unassigned	Saccharibacteria_genera_incertae_sedis	Unassigned
ASV_1364	0	0	0	0	0	0	73	0	3	0	0	5	0	1	2	0	0	0	0	0	0	0	0	0	0	0	0	0	84		Bacteria	Firmicutes	Unassigned	Unassigned	Unassigned	Unassigned	Unassigned
ASV_1378	0	10	0	5	9	20	3	1	1	20	3	6	1	4	1	0	0	0	0	0	0	0	0	0	0	0	0	0	84		Bacteria	Candidatus_Saccharibacteria	Unassigned	Unassigned	Unassigned	Saccharibacteria_genera_incertae_sedis	Unassigned
ASV_1407	0	0	0	16	10	6	6	2	9	0	14	7	0	11	0	2	0	0	0	0	0	0	0	1	0	0	0	0	84		Bacteria	Chloroflexi	Caldilineae	Caldilineales	Caldilineaceae	Unassigned	Unassigned
ASV_1484	0	0	0	1	0	0	2	45	3	3	9	12	0	3	6	0	0	0	0	0	0	0	0	0	0	0	0	0	84		Bacteria	Candidatus_Saccharibacteria	Unassigned	Unassigned	Unassigned	Saccharibacteria_genera_incertae_sedis	Unassigned
ASV_1487	0	0	2	0	0	0	0	0	0	2	0	1	17	0	0	62	0	0	0	0	0	0	0	0	0	0	0	0	84		Bacteria	Proteobacteria	Betaproteobacteria	Burkholderiales	Comamonadaceae	Unassigned	Unassigned
ASV_1511	0	41	0	1	1	25	0	0	1	2	4	1	5	1	0	2	0	0	0	0	0	0	0	0	0	0	0	0	84		Bacteria	Planctomycetes	Planctomycetia	Planctomycetales	Planctomycetaceae	Schlesneria	Schlesneria_paludicola
ASV_1701	1	0	0	21	23	34	0	0	1	0	2	0	1	1	0	0	0	0	0	0	0	0	0	0	0	0	0	0	84		Bacteria	Bacteroidetes	Sphingobacteriia	Sphingobacteriales	Chitinophagaceae	Ferruginibacter	Ferruginibacter_yonginensis
ASV_1737	0	0	18	0	0	4	0	0	5	11	2	8	26	3	0	7	0	0	0	0	0	0	0	0	0	0	0	0	84		Bacteria	Bacteroidetes	Flavobacteriia	Flavobacteriales	Flavobacteriaceae	Flavobacterium	Unassigned
ASV_1738	0	0	0	5	1	5	0	49	5	0	8	6	2	0	1	1	0	0	0	0	0	0	0	0	0	0	1	0	84		Bacteria	Chloroflexi	Caldilineae	Caldilineales	Caldilineaceae	Litorilinea	Litorilinea_aerophila
ASV_1826	0	0	0	4	22	4	16	0	11	1	7	7	2	2	5	3	0	0	0	0	0	0	0	0	0	0	0	0	84		Bacteria	Acidobacteria	Acidobacteria_Gp6	Unassigned	Unassigned	Gp6	Unassigned
ASV_1884	0	0	0	1	3	61	3	0	4	0	1	9	0	0	2	0	0	0	0	0	0	0	0	0	0	0	0	0	84		Bacteria	Unassigned	Unassigned	Unassigned	Unassigned	Unassigned	Unassigned
ASV_1962	1	0	0	14	1	15	1	0	13	7	5	7	2	12	5	1	0	0	0	0	0	0	0	0	0	0	0	0	84		Bacteria	Candidatus_Saccharibacteria	Unassigned	Unassigned	Unassigned	Saccharibacteria_genera_incertae_sedis	Unassigned
ASV_2156	0	2	0	9	38	0	4	0	16	0	3	0	0	3	9	0	0	0	0	0	0	0	0	0	0	0	0	0	84		Archaea	Thaumarchaeota	Unassigned	Nitrososphaerales	Nitrososphaeraceae	Nitrososphaera	Unassigned
ASV_2160	24	0	0	18	12	10	1	1	3	0	4	0	0	2	9	0	0	0	0	0	0	0	0	0	0	0	0	0	84		Bacteria	Proteobacteria	Alphaproteobacteria	Sphingomonadales	Sphingomonadaceae	Parablastomonas	Parablastomonas_arctica
ASV_2224	0	0	2	1	0	2	0	1	0	28	9	35	3	2	0	0	0	0	1	0	0	0	0	0	0	0	0	0	84		Bacteria	Candidatus_Saccharibacteria	Unassigned	Unassigned	Unassigned	Saccharibacteria_genera_incertae_sedis	Unassigned
ASV_2261	0	3	0	3	8	5	2	7	3	3	13	13	1	5	0	17	0	0	0	0	0	0	1	0	0	0	0	0	84		Bacteria	Acidobacteria	Acidobacteria_Gp6	Unassigned	Unassigned	Gp6	Unassigned
ASV_2342	0	0	0	3	10	8	36	0	5	1	5	9	0	4	2	1	0	0	0	0	0	0	0	0	0	0	0	0	84		Bacteria	Acidobacteria	Acidobacteria_Gp6	Unassigned	Unassigned	Gp6	Unassigned
ASV_3182	6	19	0	3	3	32	0	0	5	0	2	2	0	5	6	1	0	0	0	0	0	0	0	0	0	0	0	0	84		Bacteria	Actinobacteria	Actinobacteria	Actinomycetales	Propionibacteriaceae	Friedmanniella	Friedmanniella_lucida
ASV_3316	0	0	0	4	8	2	11	0	22	3	6	16	0	5	1	6	0	0	0	0	0	0	0	0	0	0	0	0	84		Bacteria	Acidobacteria	Acidobacteria_Gp6	Unassigned	Unassigned	Gp6	Unassigned
ASV_3725	0	0	0	2	0	6	1	27	1	9	12	20	1	2	1	1	0	1	0	0	0	0	0	0	0	0	0	0	84		Bacteria	Candidatus_Saccharibacteria	Unassigned	Unassigned	Unassigned	Saccharibacteria_genera_incertae_sedis	Unassigned
ASV_3831	2	12	0	0	2	1	0	0	0	4	4	0	1	6	2	4	12	0	0	0	4	18	0	8	0	0	4	0	84		Bacteria	Proteobacteria	Alphaproteobacteria	Caulobacterales	Caulobacteraceae	Brevundimonas	Unassigned
ASV_4122	8	0	0	12	34	14	0	0	2	1	6	1	1	4	1	0	0	0	0	0	0	0	0	0	0	0	0	0	84		Bacteria	Bacteroidetes	Sphingobacteriia	Sphingobacteriales	Chitinophagaceae	Unassigned	Unassigned
ASV_4660	1	0	0	7	7	15	11	0	13	1	10	11	3	4	0	1	0	0	0	0	0	0	0	0	0	0	0	0	84		Bacteria	Acidobacteria	Acidobacteria_Gp6	Unassigned	Unassigned	Gp6	Unassigned
ASV_4685	25	19	0	2	1	2	1	1	0	21	2	1	7	1	1	0	0	0	0	0	0	0	0	0	0	0	0	0	84		Bacteria	Actinobacteria	Actinobacteria	Actinomycetales	Microbacteriaceae	Clavibacter	Unassigned
ASV_4978	0	1	0	6	4	9	15	0	8	1	12	8	6	3	0	10	0	1	0	0	0	0	0	0	0	0	0	0	84		Bacteria	Acidobacteria	Acidobacteria_Gp6	Unassigned	Unassigned	Gp6	Unassigned
ASV_5071	9	0	0	3	31	7	5	0	9	0	8	0	1	4	4	3	0	0	0	0	0	0	0	0	0	0	0	0	84		Bacteria	Bacteroidetes	Sphingobacteriia	Sphingobacteriales	Chitinophagaceae	Terrimonas	Terrimonas_aquatica
ASV_1029	0	3	68	0	0	0	0	0	0	2	0	1	1	0	0	2	1	0	0	0	0	5	0	0	0	0	0	0	83		Bacteria	Proteobacteria	Betaproteobacteria	Burkholderiales	Burkholderiaceae	Polynucleobacter	Polynucleobacter_necessarius_subsp._asymbioticus
ASV_1062	0	0	0	0	0	0	0	79	1	0	1	2	0	0	0	0	0	0	0	0	0	0	0	0	0	0	0	0	83		Bacteria	Unassigned	Unassigned	Unassigned	Unassigned	Unassigned	Unassigned
ASV_1252	0	0	0	0	0	0	0	0	0	0	0	0	0	0	0	41	30	5	7	0	0	0	0	0	0	0	0	0	83		Bacteria	Actinobacteria	Actinobacteria	Acidimicrobiales	Acidimicrobiaceae	Ilumatobacter	Ilumatobacter_fluminis
ASV_1335	0	0	0	1	13	3	14	0	14	0	7	9	1	9	11	1	0	0	0	0	0	0	0	0	0	0	0	0	83		Bacteria	Acidobacteria	Acidobacteria_Gp7	Unassigned	Unassigned	Gp7	Unassigned
ASV_1362	0	42	1	0	0	29	0	0	5	0	0	5	0	0	0	1	0	0	0	0	0	0	0	0	0	0	0	0	83		Bacteria	Parcubacteria	Unassigned	Unassigned	Unassigned	Parcubacteria_genera_incertae_sedis	Unassigned
ASV_1359	8	0	4	9	37	3	0	2	2	0	1	2	1	0	6	7	0	0	0	0	0	0	0	1	0	0	0	0	83		Bacteria	Proteobacteria	Betaproteobacteria	Burkholderiales	Comamonadaceae	Variovorax	Unassigned
ASV_1429	0	0	0	0	0	0	0	0	0	0	0	0	0	0	0	0	1	2	0	0	2	4	1	54	5	10	1	3	83		Bacteria	Actinobacteria	Actinobacteria	Actinomycetales	Microbacteriaceae	Pontimonas	Pontimonas_salivibrio
ASV_1460	0	0	23	0	0	0	0	0	0	5	1	3	1	0	0	17	5	0	4	1	4	1	0	7	2	3	2	4	83		Bacteria	Proteobacteria	Alphaproteobacteria	Rhodobacterales	Rhodobacteraceae	Tabrizicola	Tabrizicola_aquatica
ASV_1472	0	5	0	0	1	73	1	0	1	0	0	0	0	0	0	2	0	0	0	0	0	0	0	0	0	0	0	0	83		Bacteria	Proteobacteria	Gammaproteobacteria	Pseudomonadales	Moraxellaceae	Acinetobacter	Acinetobacter_beijerinckii
ASV_1542	0	36	1	0	0	31	0	0	2	1	5	4	0	1	0	2	0	0	0	0	0	0	0	0	0	0	0	0	83		Bacteria	Parcubacteria	Unassigned	Unassigned	Unassigned	Parcubacteria_genera_incertae_sedis	Unassigned
ASV_1568	9	15	1	2	0	24	1	2	0	11	4	2	3	2	4	1	1	1	0	0	0	0	0	0	0	0	0	0	83		Bacteria	Actinobacteria	Actinobacteria	Actinomycetales	Microbacteriaceae	Microbacterium	Microbacterium_terricola
ASV_1692	2	21	0	14	7	3	3	1	12	2	6	7	2	2	1	0	0	0	0	0	0	0	0	0	0	0	0	0	83		Bacteria	Verrucomicrobia	Spartobacteria	Unassigned	Unassigned	Spartobacteria_genera_incertae_sedis	Unassigned
ASV_1872	0	0	0	14	12	5	7	0	14	0	10	9	2	4	3	3	0	0	0	0	0	0	0	0	0	0	0	0	83		Bacteria	Acidobacteria	Acidobacteria_Gp4	Unassigned	Unassigned	Aridibacter	Aridibacter_famidurans
ASV_1908	0	5	0	1	2	7	2	5	13	2	12	10	1	11	0	5	7	0	0	0	0	0	0	0	0	0	0	0	83		Bacteria	Actinobacteria	Actinobacteria	Unassigned	Unassigned	Unassigned	Unassigned
ASV_1927	1	2	0	3	5	15	18	0	7	0	10	10	0	7	2	3	0	0	0	0	0	0	0	0	0	0	0	0	83		Bacteria	Actinobacteria	Actinobacteria	Unassigned	Unassigned	Unassigned	Unassigned
ASV_2022	0	0	0	3	0	0	0	1	30	10	12	13	2	8	0	1	0	0	0	0	0	0	0	0	0	0	3	0	83		Bacteria	Acidobacteria	Acidobacteria_Gp4	Unassigned	Unassigned	Aridibacter	Aridibacter_famidurans
ASV_2025	1	0	0	3	1	0	1	0	29	9	4	20	12	2	0	1	0	0	0	0	0	0	0	0	0	0	0	0	83		Bacteria	Proteobacteria	Deltaproteobacteria	Unassigned	Unassigned	Unassigned	Unassigned
ASV_2120	0	54	0	0	2	0	0	0	5	2	1	6	5	0	0	7	0	0	0	0	0	0	0	0	0	0	1	0	83		Bacteria	Verrucomicrobia	Verrucomicrobiae	Verrucomicrobiales	Verrucomicrobiaceae	Prosthecobacter	Unassigned
ASV_2195	0	0	0	0	1	3	2	6	11	2	16	25	3	8	3	2	1	0	0	0	0	0	0	0	0	0	0	0	83		Bacteria	Chloroflexi	Caldilineae	Caldilineales	Caldilineaceae	Litorilinea	Litorilinea_aerophila
ASV_2452	0	53	0	0	0	2	0	0	1	0	1	21	1	1	0	3	0	0	0	0	0	0	0	0	0	0	0	0	83		Bacteria	Unassigned	Unassigned	Unassigned	Unassigned	Unassigned	Unassigned
ASV_2926	0	0	1	0	0	0	3	17	6	6	8	13	3	7	0	9	0	2	3	0	0	0	0	0	0	0	4	1	83		Bacteria	Planctomycetes	Planctomycetia	Planctomycetales	Planctomycetaceae	Pirellula	Pirellula_staleyi
ASV_3163	0	0	0	12	6	5	9	2	8	1	11	12	3	3	1	10	0	0	0	0	0	0	0	0	0	0	0	0	83		Bacteria	Acidobacteria	Acidobacteria_Gp6	Unassigned	Unassigned	Gp6	Unassigned
ASV_3941	1	0	0	13	3	6	4	18	6	7	13	9	1	1	0	1	0	0	0	0	0	0	0	0	0	0	0	0	83		Bacteria	Candidatus_Saccharibacteria	Unassigned	Unassigned	Unassigned	Saccharibacteria_genera_incertae_sedis	Unassigned
ASV_4230	27	37	3	0	0	8	1	0	0	3	1	0	2	0	1	0	0	0	0	0	0	0	0	0	0	0	0	0	83		Bacteria	Parcubacteria	Unassigned	Unassigned	Unassigned	Parcubacteria_genera_incertae_sedis	Unassigned
ASV_4599	0	6	0	8	12	1	20	0	14	1	2	5	0	6	4	4	0	0	0	0	0	0	0	0	0	0	0	0	83		Bacteria	Acidobacteria	Acidobacteria_Gp6	Unassigned	Unassigned	Gp6	Unassigned
ASV_5249	0	0	0	0	1	0	0	27	9	0	10	13	5	4	0	5	6	0	1	1	0	0	1	0	0	0	0	0	83		Bacteria	Chloroflexi	Caldilineae	Caldilineales	Caldilineaceae	Caldilinea	Caldilinea_tarbellica
ASV_5719	0	0	0	9	6	7	9	2	8	2	9	10	7	7	1	5	1	0	0	0	0	0	0	0	0	0	0	0	83		Bacteria	Acidobacteria	Acidobacteria_Gp6	Unassigned	Unassigned	Gp6	Unassigned
ASV_1221	0	33	0	0	0	20	0	0	1	0	0	1	0	0	0	0	0	0	0	0	0	1	20	0	0	0	2	4	82		Bacteria	Actinobacteria	Actinobacteria	Actinomycetales	Propionibacteriaceae	Propionibacterium	Propionibacterium_acnes
ASV_1309	0	0	44	0	0	0	0	0	1	4	0	3	4	1	1	24	0	0	0	0	0	0	0	0	0	0	0	0	82		Bacteria	Proteobacteria	Betaproteobacteria	Burkholderiales	Burkholderiaceae	Polynucleobacter	Polynucleobacter_cosmopolitanus
ASV_1331	0	3	0	6	11	6	3	1	13	1	7	12	1	6	7	5	0	0	0	0	0	0	0	0	0	0	0	0	82		Bacteria	Actinobacteria	Actinobacteria	Unassigned	Unassigned	Unassigned	Unassigned
ASV_1339	22	0	0	0	0	50	0	0	0	1	2	0	1	1	4	0	0	0	0	0	0	0	0	0	0	0	1	0	82		Bacteria	Actinobacteria	Actinobacteria	Actinomycetales	Dietziaceae	Dietzia	Dietzia_lutea
ASV_1443	0	58	0	1	4	1	5	0	3	6	2	1	0	0	1	0	0	0	0	0	0	0	0	0	0	0	0	0	82		Bacteria	Unassigned	Unassigned	Unassigned	Unassigned	Unassigned	Unassigned
ASV_1599	2	0	0	2	1	0	1	31	0	6	12	14	6	5	2	0	0	0	0	0	0	0	0	0	0	0	0	0	82		Bacteria	Candidatus_Saccharibacteria	Unassigned	Unassigned	Unassigned	Saccharibacteria_genera_incertae_sedis	Unassigned
ASV_1744	0	1	0	0	26	8	10	0	16	1	7	4	2	3	0	4	0	0	0	0	0	0	0	0	0	0	0	0	82		Bacteria	Acidobacteria	Acidobacteria_Gp6	Unassigned	Unassigned	Gp6	Unassigned
ASV_1828	0	0	0	13	11	8	1	2	8	4	14	7	4	2	5	3	0	0	0	0	0	0	0	0	0	0	0	0	82		Bacteria	Acidobacteria	Acidobacteria_Gp4	Unassigned	Unassigned	Aridibacter	Aridibacter_famidurans
ASV_2138	13	1	0	2	0	3	0	0	0	9	0	0	0	15	5	16	0	0	0	2	5	0	1	4	0	3	1	2	82		Bacteria	Actinobacteria	Actinobacteria	Actinomycetales	Micrococcaceae	Kocuria	Unassigned
ASV_2366	32	0	0	13	0	2	0	1	0	2	6	0	0	21	5	0	0	0	0	0	0	0	0	0	0	0	0	0	82		Bacteria	Bacteroidetes	Cytophagia	Cytophagales	Cytophagaceae	Hymenobacter	Unassigned
ASV_2463	0	59	0	0	0	0	1	0	1	0	0	1	0	0	0	20	0	0	0	0	0	0	0	0	0	0	0	0	82		Bacteria	Parcubacteria	Unassigned	Unassigned	Unassigned	Parcubacteria_genera_incertae_sedis	Unassigned
ASV_2491	0	0	0	11	14	0	6	4	12	0	13	7	0	4	5	6	0	0	0	0	0	0	0	0	0	0	0	0	82		Bacteria	Acidobacteria	Acidobacteria_Gp6	Unassigned	Unassigned	Gp6	Unassigned
ASV_2626	9	0	0	5	1	7	3	4	0	15	11	0	24	0	0	1	0	0	2	0	0	0	0	0	0	0	0	0	82		Bacteria	Verrucomicrobia	Verrucomicrobiae	Verrucomicrobiales	Verrucomicrobiaceae	Luteolibacter	Unassigned
ASV_2642	2	13	0	4	3	12	0	30	2	0	6	7	0	1	2	0	0	0	0	0	0	0	0	0	0	0	0	0	82		Bacteria	Candidatus_Saccharibacteria	Unassigned	Unassigned	Unassigned	Saccharibacteria_genera_incertae_sedis	Unassigned
ASV_2677	10	1	1	6	2	2	3	0	2	11	3	1	1	1	1	6	1	3	5	0	1	12	0	1	0	7	0	1	82		Bacteria	Proteobacteria	Alphaproteobacteria	Caulobacterales	Caulobacteraceae	Caulobacter	Caulobacter_fusiformis
ASV_2749	0	24	1	3	2	5	0	3	1	1	12	6	10	13	1	0	0	0	0	0	0	0	0	0	0	0	0	0	82		Bacteria	Chloroflexi	Anaerolineae	Anaerolineales	Anaerolineaceae	Anaerolinea	Anaerolinea_thermolimosa
ASV_2838	3	10	11	5	2	13	1	16	1	5	4	0	6	1	1	3	0	0	0	0	0	0	0	0	0	0	0	0	82		Bacteria	Bacteroidetes	Flavobacteriia	Flavobacteriales	Flavobacteriaceae	Flavobacterium	Flavobacterium_segetis
ASV_2850	2	45	0	1	2	0	4	7	0	5	3	7	0	3	3	0	0	0	0	0	0	0	0	0	0	0	0	0	82		Bacteria	Candidatus_Saccharibacteria	Unassigned	Unassigned	Unassigned	Saccharibacteria_genera_incertae_sedis	Unassigned
ASV_2888	0	2	1	4	4	2	5	1	9	0	3	6	0	1	0	0	1	0	0	0	0	0	0	0	0	0	43	0	82		Bacteria	Candidatus_Saccharibacteria	Unassigned	Unassigned	Unassigned	Saccharibacteria_genera_incertae_sedis	Unassigned
ASV_3326	0	2	0	1	13	8	17	0	22	1	4	7	0	5	1	1	0	0	0	0	0	0	0	0	0	0	0	0	82		Bacteria	Acidobacteria	Acidobacteria_Gp6	Unassigned	Unassigned	Gp6	Unassigned
ASV_3486	2	0	0	13	7	8	9	0	13	1	11	3	2	2	8	3	0	0	0	0	0	0	0	0	0	0	0	0	82		Bacteria	Unassigned	Unassigned	Unassigned	Unassigned	Unassigned	Unassigned
ASV_4371	0	0	0	5	2	23	5	0	2	5	17	11	0	5	3	4	0	0	0	0	0	0	0	0	0	0	0	0	82		Bacteria	Planctomycetes	Planctomycetia	Planctomycetales	Planctomycetaceae	Unassigned	Unassigned
ASV_4437	5	0	0	16	30	6	1	0	2	1	9	0	1	7	2	1	1	0	0	0	0	0	0	0	0	0	0	0	82		Bacteria	Bacteroidetes	Sphingobacteriia	Sphingobacteriales	Chitinophagaceae	Unassigned	Unassigned
ASV_4758	36	26	0	0	0	4	0	1	2	0	2	0	10	0	0	1	0	0	0	0	0	0	0	0	0	0	0	0	82		Bacteria	Parcubacteria	Unassigned	Unassigned	Unassigned	Parcubacteria_genera_incertae_sedis	Unassigned
ASV_5373	2	0	2	1	1	0	0	0	1	32	1	0	1	35	4	2	0	0	0	0	0	0	0	0	0	0	0	0	82		Bacteria	Proteobacteria	Alphaproteobacteria	Sphingomonadales	Sphingomonadaceae	Sphingorhabdus	Sphingorhabdus_planktonica
ASV_5966	0	0	0	5	1	5	29	0	6	4	6	11	4	6	0	5	0	0	0	0	0	0	0	0	0	0	0	0	82		Bacteria	Acidobacteria	Acidobacteria_Gp6	Unassigned	Unassigned	Gp6	Unassigned
ASV_1136	0	0	0	0	0	0	2	18	3	5	7	7	0	2	1	11	1	13	0	0	0	0	7	4	0	0	0	0	81		Bacteria	Unassigned	Unassigned	Unassigned	Unassigned	Unassigned	Unassigned
ASV_1154	0	0	0	0	0	0	0	1	0	3	1	0	0	0	73	1	0	0	0	0	0	0	0	0	0	2	0	0	81		Bacteria	Firmicutes	Bacilli	Bacillales	Bacillales_Incertae_Sedis_XII	Exiguobacterium	Unassigned
ASV_1195	0	0	0	0	0	0	0	0	0	0	0	0	0	0	0	1	8	21	24	7	3	4	6	2	0	0	3	2	81		Bacteria	Planctomycetes	Planctomycetia	Planctomycetales	Planctomycetaceae	Unassigned	Unassigned
ASV_1352	0	0	1	0	0	0	0	0	0	0	0	0	1	0	29	1	20	0	15	0	0	0	1	5	0	0	8	0	81		Bacteria	Proteobacteria	Alphaproteobacteria	Caulobacterales	Caulobacteraceae	Unassigned	Unassigned
ASV_1401	8	2	0	17	26	3	0	0	5	0	2	0	0	6	12	0	0	0	0	0	0	0	0	0	0	0	0	0	81		Bacteria	Proteobacteria	Alphaproteobacteria	Sphingomonadales	Sphingomonadaceae	Sphingomonas	Unassigned
ASV_1461	3	0	0	0	0	1	1	0	0	1	0	0	9	4	2	0	1	1	0	7	1	3	0	2	0	36	9	0	81		Bacteria	Proteobacteria	Alphaproteobacteria	Caulobacterales	Caulobacteraceae	Brevundimonas	Brevundimonas_aurantiaca
ASV_1586	0	4	0	4	5	10	21	0	15	0	6	7	2	3	4	0	0	0	0	0	0	0	0	0	0	0	0	0	81		Bacteria	Unassigned	Unassigned	Unassigned	Unassigned	Unassigned	Unassigned
ASV_1603	0	5	0	23	24	1	0	0	4	0	11	7	0	1	3	2	0	0	0	0	0	0	0	0	0	0	0	0	81		Bacteria	Acidobacteria	Acidobacteria_Gp4	Unassigned	Unassigned	Aridibacter	Aridibacter_famidurans
ASV_1665	0	0	0	10	2	4	6	9	6	5	11	15	6	4	0	3	0	0	0	0	0	0	0	0	0	0	0	0	81		Bacteria	Planctomycetes	Planctomycetia	Planctomycetales	Planctomycetaceae	Unassigned	Unassigned
ASV_1682	0	78	0	0	0	0	0	0	0	0	1	0	0	0	0	2	0	0	0	0	0	0	0	0	0	0	0	0	81		Bacteria	Planctomycetes	Planctomycetia	Planctomycetales	Planctomycetaceae	Unassigned	Unassigned
ASV_1786	0	0	1	1	0	1	0	9	8	21	11	16	7	5	1	0	0	0	0	0	0	0	0	0	0	0	0	0	81		Bacteria	Proteobacteria	Unassigned	Unassigned	Unassigned	Unassigned	Unassigned
ASV_1844	0	0	0	27	34	5	4	0	0	0	4	5	1	0	1	0	0	0	0	0	0	0	0	0	0	0	0	0	81		Bacteria	Acidobacteria	Acidobacteria_Gp4	Unassigned	Unassigned	Aridibacter	Aridibacter_famidurans
ASV_1949	1	0	0	4	0	0	0	1	1	2	0	1	2	1	0	0	0	0	0	0	0	0	0	0	0	0	68	0	81		Bacteria	Candidatus_Saccharibacteria	Unassigned	Unassigned	Unassigned	Saccharibacteria_genera_incertae_sedis	Unassigned
ASV_2207	0	0	0	0	2	9	8	0	25	3	8	12	6	4	0	4	0	0	0	0	0	0	0	0	0	0	0	0	81		Bacteria	Acidobacteria	Acidobacteria_Gp6	Unassigned	Unassigned	Gp6	Unassigned
ASV_2226	0	0	0	10	4	1	0	47	4	1	4	5	2	3	0	0	0	0	0	0	0	0	0	0	0	0	0	0	81		Bacteria	Verrucomicrobia	Verrucomicrobiae	Verrucomicrobiales	Verrucomicrobiaceae	Verrucomicrobium	Verrucomicrobium_spinosum
ASV_2602	0	0	0	1	4	8	48	0	5	1	3	6	2	2	0	1	0	0	0	0	0	0	0	0	0	0	0	0	81		Bacteria	Unassigned	Unassigned	Unassigned	Unassigned	Unassigned	Unassigned
ASV_3207	0	7	0	0	9	2	43	0	9	1	5	4	0	0	0	1	0	0	0	0	0	0	0	0	0	0	0	0	81		Bacteria	Acidobacteria	Acidobacteria_Gp6	Unassigned	Unassigned	Gp6	Unassigned
ASV_3364	0	0	0	3	1	1	1	41	4	5	13	6	1	4	0	0	0	0	0	0	0	1	0	0	0	0	0	0	81		Bacteria	Candidatus_Saccharibacteria	Unassigned	Unassigned	Unassigned	Saccharibacteria_genera_incertae_sedis	Unassigned
ASV_3418	0	30	0	14	7	4	4	0	1	1	7	5	3	3	0	2	0	0	0	0	0	0	0	0	0	0	0	0	81		Bacteria	candidate_division_WPS-1	Unassigned	Unassigned	Unassigned	WPS-1_genera_incertae_sedis	Unassigned
ASV_3540	25	38	1	2	1	0	0	0	0	7	1	0	2	2	2	0	0	0	0	0	0	0	0	0	0	0	0	0	81		Bacteria	Actinobacteria	Actinobacteria	Actinomycetales	Microbacteriaceae	Subtercola	Subtercola_frigoramans
ASV_4859	0	0	0	10	5	4	3	3	12	4	8	15	3	5	1	7	0	0	0	0	0	0	0	0	0	0	1	0	81		Bacteria	Acidobacteria	Acidobacteria_Gp6	Unassigned	Unassigned	Gp6	Unassigned
ASV_5583	4	0	0	16	9	24	1	14	3	1	2	3	0	2	2	0	0	0	0	0	0	0	0	0	0	0	0	0	81		Bacteria	Candidatus_Saccharibacteria	Unassigned	Unassigned	Unassigned	Saccharibacteria_genera_incertae_sedis	Unassigned
ASV_5643	0	0	0	0	3	0	0	0	4	0	0	0	0	0	5	0	68	0	0	0	0	0	0	1	0	0	0	0	81		Bacteria	Planctomycetes	Planctomycetia	Planctomycetales	Planctomycetaceae	Gemmata	Gemmata_obscuriglobus
ASV_5784	1	24	0	4	6	23	5	0	4	1	5	4	1	0	3	0	0	0	0	0	0	0	0	0	0	0	0	0	81		Bacteria	Chloroflexi	Thermomicrobia	Unassigned	Unassigned	Unassigned	Unassigned
ASV_1125	1	0	0	0	0	0	0	0	0	26	0	0	4	5	1	29	10	0	4	0	0	0	0	0	0	0	0	0	80		Bacteria	Actinobacteria	Actinobacteria	Actinomycetales	Unassigned	Unassigned	Unassigned
ASV_1173	0	0	0	0	0	0	0	0	0	0	0	0	0	0	0	0	7	3	2	1	7	5	1	43	2	4	1	4	80		Bacteria	Actinobacteria	Actinobacteria	Actinomycetales	Microbacteriaceae	Pontimonas	Pontimonas_salivibrio
ASV_1192	0	0	0	0	0	0	0	0	0	0	0	0	0	0	0	0	0	2	30	0	6	0	7	11	8	1	5	10	80		Bacteria	Unassigned	Unassigned	Unassigned	Unassigned	Unassigned	Unassigned
ASV_1196	0	71	1	0	0	1	0	0	0	2	2	0	0	0	0	0	0	0	1	0	0	0	1	0	1	0	0	0	80		Bacteria	Proteobacteria	Alphaproteobacteria	Rhizobiales	Brucellaceae	Ochrobactrum	Unassigned
ASV_1198	1	0	3	0	0	0	0	0	0	0	0	0	0	0	0	0	18	0	3	0	0	0	0	0	0	0	55	0	80		Bacteria	Actinobacteria	Actinobacteria	Unassigned	Unassigned	Unassigned	Unassigned
ASV_1220	0	0	0	0	0	0	0	0	0	0	0	0	0	0	0	0	1	0	3	2	8	4	1	13	1	0	5	42	80		Bacteria	Proteobacteria	Alphaproteobacteria	Caulobacterales	Hyphomonadaceae	Hyphomonas	Hyphomonas_polymorpha
ASV_1239	0	11	0	1	0	0	1	6	0	3	2	2	1	0	2	0	3	0	33	0	0	0	0	0	0	3	12	0	80		Bacteria	Planctomycetes	Planctomycetia	Planctomycetales	Planctomycetaceae	Thermogutta	Thermogutta_hypogea
ASV_1253	0	0	0	0	0	0	0	0	0	0	0	0	0	0	0	0	1	1	0	1	6	3	0	16	4	3	3	42	80		Bacteria	Proteobacteria	Alphaproteobacteria	Caulobacterales	Hyphomonadaceae	Unassigned	Unassigned
ASV_1363	2	0	0	12	19	4	3	5	1	0	18	11	1	2	2	0	0	0	0	0	0	0	0	0	0	0	0	0	80		Bacteria	Candidatus_Saccharibacteria	Unassigned	Unassigned	Unassigned	Saccharibacteria_genera_incertae_sedis	Unassigned
ASV_1427	13	0	0	0	0	0	0	1	0	1	3	0	0	14	48	0	0	0	0	0	0	0	0	0	0	0	0	0	80		Bacteria	Bacteroidetes	Cytophagia	Cytophagales	Cytophagaceae	Hymenobacter	Hymenobacter_elongatus
ASV_1526	0	0	0	5	1	0	2	0	1	0	5	4	1	0	0	1	15	6	0	4	0	0	15	0	0	0	20	0	80		Bacteria	Acidobacteria	Acidobacteria_Gp4	Unassigned	Unassigned	Aridibacter	Aridibacter_famidurans
ASV_1600	24	0	0	1	0	1	0	1	0	2	0	0	2	2	46	1	0	0	0	0	0	0	0	0	0	0	0	0	80		Bacteria	Actinobacteria	Actinobacteria	Actinomycetales	Micrococcaceae	Arthrobacter	Unassigned
ASV_1795	13	1	0	0	3	6	1	1	1	44	1	0	2	4	3	0	0	0	0	0	0	0	0	0	0	0	0	0	80		Bacteria	Actinobacteria	Actinobacteria	Actinomycetales	Micrococcaceae	Arthrobacter	Unassigned
ASV_1796	13	1	0	0	0	1	0	0	0	58	1	0	0	1	5	0	0	0	0	0	0	0	0	0	0	0	0	0	80		Bacteria	Actinobacteria	Actinobacteria	Actinomycetales	Micrococcaceae	Arthrobacter	Unassigned
ASV_1978	0	0	0	3	16	6	20	0	9	0	8	10	0	2	4	2	0	0	0	0	0	0	0	0	0	0	0	0	80		Bacteria	Acidobacteria	Acidobacteria_Gp6	Unassigned	Unassigned	Gp6	Unassigned
ASV_2133	0	0	0	0	0	0	80	0	0	0	0	0	0	0	0	0	0	0	0	0	0	0	0	0	0	0	0	0	80		Archaea	Euryarchaeota	Thermoplasmata	Unassigned	Unassigned	Unassigned	Unassigned
ASV_2144	1	1	0	11	20	12	7	0	7	0	8	3	0	3	4	2	1	0	0	0	0	0	0	0	0	0	0	0	80		Bacteria	Verrucomicrobia	Spartobacteria	Unassigned	Unassigned	Spartobacteria_genera_incertae_sedis	Unassigned
ASV_2168	10	7	0	5	5	6	0	0	0	1	17	0	1	18	10	0	0	0	0	0	0	0	0	0	0	0	0	0	80		Bacteria	Bacteroidetes	Cytophagia	Cytophagales	Cytophagaceae	Hymenobacter	Unassigned
ASV_2209	2	0	0	20	13	2	3	2	8	2	8	11	6	3	0	0	0	0	0	0	0	0	0	0	0	0	0	0	80		Bacteria	Verrucomicrobia	Spartobacteria	Unassigned	Unassigned	Spartobacteria_genera_incertae_sedis	Unassigned
ASV_2248	0	0	0	16	3	0	3	1	6	9	12	9	1	1	9	5	2	1	1	0	0	0	0	0	0	0	1	0	80		Bacteria	Unassigned	Unassigned	Unassigned	Unassigned	Unassigned	Unassigned
ASV_2558	0	0	0	0	0	0	80	0	0	0	0	0	0	0	0	0	0	0	0	0	0	0	0	0	0	0	0	0	80		Archaea	Euryarchaeota	Thermoplasmata	Unassigned	Unassigned	Unassigned	Unassigned
ASV_2647	1	28	0	12	5	15	1	0	2	0	0	12	1	0	3	0	0	0	0	0	0	0	0	0	0	0	0	0	80		Bacteria	Candidatus_Saccharibacteria	Unassigned	Unassigned	Unassigned	Saccharibacteria_genera_incertae_sedis	Unassigned
ASV_3050	0	38	0	3	4	6	1	0	3	2	10	3	1	6	0	2	0	1	0	0	0	0	0	0	0	0	0	0	80		Bacteria	Planctomycetes	Planctomycetia	Planctomycetales	Planctomycetaceae	Rubinisphaera	Rubinisphaera_brasiliensis
ASV_3334	0	0	0	0	4	18	7	3	8	7	13	12	4	0	2	0	0	0	0	2	0	0	0	0	0	0	0	0	80		Bacteria	Candidatus_Saccharibacteria	Unassigned	Unassigned	Unassigned	Saccharibacteria_genera_incertae_sedis	Unassigned
ASV_3782	2	32	0	2	2	6	3	1	3	1	2	1	1	2	1	0	0	2	0	0	0	19	0	0	0	0	0	0	80		Bacteria	Candidatus_Saccharibacteria	Unassigned	Unassigned	Unassigned	Saccharibacteria_genera_incertae_sedis	Unassigned
ASV_4092	0	0	0	11	16	3	7	0	18	0	12	4	2	2	3	2	0	0	0	0	0	0	0	0	0	0	0	0	80		Bacteria	Verrucomicrobia	Verrucomicrobiae	Verrucomicrobiales	Verrucomicrobiaceae	Unassigned	Unassigned
ASV_4381	0	0	0	4	11	1	5	4	23	2	8	7	2	7	3	3	0	0	0	0	0	0	0	0	0	0	0	0	80		Bacteria	Acidobacteria	Acidobacteria_Gp6	Unassigned	Unassigned	Gp6	Unassigned
ASV_4451	3	3	0	2	5	2	3	19	7	0	16	11	1	3	5	0	0	0	0	0	0	0	0	0	0	0	0	0	80		Bacteria	Candidatus_Saccharibacteria	Unassigned	Unassigned	Unassigned	Saccharibacteria_genera_incertae_sedis	Unassigned
ASV_4488	18	0	0	7	0	0	0	0	0	1	5	0	0	18	31	0	0	0	0	0	0	0	0	0	0	0	0	0	80		Bacteria	Bacteroidetes	Cytophagia	Cytophagales	Cytophagaceae	Hymenobacter	Hymenobacter_yonginensis
ASV_5011	11	0	0	1	13	4	1	0	4	16	5	2	1	10	9	1	1	0	0	0	0	0	1	0	0	0	0	0	80		Bacteria	Proteobacteria	Alphaproteobacteria	Sphingomonadales	Erythrobacteraceae	Erythromicrobium	Erythromicrobium_ramosum
ASV_5042	8	0	0	20	27	19	0	0	1	1	3	0	0	1	0	0	0	0	0	0	0	0	0	0	0	0	0	0	80		Bacteria	Bacteroidetes	Sphingobacteriia	Sphingobacteriales	Chitinophagaceae	Unassigned	Unassigned
ASV_5211	0	0	0	1	0	0	0	0	0	0	0	0	0	0	0	0	2	29	4	4	6	3	3	0	7	9	5	7	80		Bacteria	Verrucomicrobia	Spartobacteria	Unassigned	Unassigned	Spartobacteria_genera_incertae_sedis	Unassigned
ASV_5225	0	0	0	3	2	7	2	15	2	1	2	2	2	2	5	0	1	0	1	0	4	0	0	0	0	1	28	0	80		Bacteria	Planctomycetes	Planctomycetia	Planctomycetales	Planctomycetaceae	Unassigned	Unassigned
ASV_5725	0	0	0	19	12	2	2	3	7	2	13	13	1	4	0	2	0	0	0	0	0	0	0	0	0	0	0	0	80		Bacteria	candidate_division_WPS-1	Unassigned	Unassigned	Unassigned	WPS-1_genera_incertae_sedis	Unassigned
ASV_5935	12	6	0	2	9	12	3	1	5	8	6	1	2	8	1	4	0	0	0	0	0	0	0	0	0	0	0	0	80		Bacteria	Proteobacteria	Alphaproteobacteria	Rhizobiales	Unassigned	Unassigned	Unassigned
ASV_1123	0	0	0	0	0	0	0	0	0	0	0	0	0	0	0	0	4	0	1	0	0	71	1	0	0	0	2	0	79		Bacteria	Verrucomicrobia	Verrucomicrobiae	Verrucomicrobiales	Verrucomicrobiaceae	Unassigned	Unassigned
ASV_1233	0	50	0	0	1	20	1	0	1	0	1	1	2	0	0	2	0	0	0	0	0	0	0	0	0	0	0	0	79		Bacteria	Parcubacteria	Unassigned	Unassigned	Unassigned	Parcubacteria_genera_incertae_sedis	Unassigned
ASV_1351	1	0	0	1	0	0	1	0	1	0	0	0	0	2	2	0	28	0	4	0	3	12	2	9	0	1	0	12	79		Bacteria	Proteobacteria	Alphaproteobacteria	Caulobacterales	Caulobacteraceae	Phenylobacterium	Phenylobacterium_falsum
ASV_1389	0	56	0	0	1	8	2	1	3	1	0	6	0	1	0	0	0	0	0	0	0	0	0	0	0	0	0	0	79		Bacteria	Parcubacteria	Unassigned	Unassigned	Unassigned	Parcubacteria_genera_incertae_sedis	Unassigned
ASV_1385	30	0	5	0	2	2	1	0	0	8	7	0	0	14	10	0	0	0	0	0	0	0	0	0	0	0	0	0	79		Bacteria	Proteobacteria	Alphaproteobacteria	Caulobacterales	Caulobacteraceae	Brevundimonas	Brevundimonas_variabilis
ASV_1405	0	0	0	2	28	2	6	0	28	0	4	1	0	5	3	0	0	0	0	0	0	0	0	0	0	0	0	0	79		Archaea	Thaumarchaeota	Unassigned	Nitrososphaerales	Nitrososphaeraceae	Nitrososphaera	Unassigned
ASV_1524	0	0	0	0	0	0	2	70	0	0	1	4	0	1	1	0	0	0	0	0	0	0	0	0	0	0	0	0	79		Bacteria	Candidatus_Saccharibacteria	Unassigned	Unassigned	Unassigned	Saccharibacteria_genera_incertae_sedis	Unassigned
ASV_1544	2	3	0	6	18	8	5	0	20	2	8	3	0	3	0	1	0	0	0	0	0	0	0	0	0	0	0	0	79		Archaea	Thaumarchaeota	Unassigned	Nitrososphaerales	Nitrososphaeraceae	Nitrososphaera	Unassigned
ASV_1552	0	0	0	1	1	0	1	51	2	1	9	8	1	0	0	4	0	0	0	0	0	0	0	0	0	0	0	0	79		Bacteria	Planctomycetes	Planctomycetia	Planctomycetales	Planctomycetaceae	Unassigned	Unassigned
ASV_1757	1	0	0	0	1	60	0	1	0	7	1	2	2	2	2	0	0	0	0	0	0	0	0	0	0	0	0	0	79		Bacteria	Actinobacteria	Actinobacteria	Actinomycetales	Micrococcaceae	Arthrobacter	Unassigned
ASV_1772	0	0	74	0	0	0	0	1	1	1	0	1	1	0	0	0	0	0	0	0	0	0	0	0	0	0	0	0	79		Bacteria	Candidatus_Saccharibacteria	Unassigned	Unassigned	Unassigned	Saccharibacteria_genera_incertae_sedis	Unassigned
ASV_1961	0	0	0	15	5	3	2	2	9	2	11	13	5	6	1	5	0	0	0	0	0	0	0	0	0	0	0	0	79		Bacteria	Acidobacteria	Acidobacteria_Gp4	Unassigned	Unassigned	Aridibacter	Aridibacter_famidurans
ASV_2019	0	0	0	1	1	1	0	7	2	14	8	1	14	7	2	1	0	0	17	0	2	0	0	0	0	0	1	0	79		Bacteria	Verrucomicrobia	Verrucomicrobiae	Verrucomicrobiales	Verrucomicrobiaceae	Luteolibacter	Unassigned
ASV_2030	1	0	0	8	20	5	2	1	6	5	22	6	1	2	0	0	0	0	0	0	0	0	0	0	0	0	0	0	79		Bacteria	Verrucomicrobia	Unassigned	Unassigned	Unassigned	Unassigned	Unassigned
ASV_2247	0	0	0	1	2	0	0	7	1	4	4	4	0	1	3	0	2	15	8	1	0	6	1	3	2	0	5	9	79		Bacteria	Planctomycetes	Planctomycetia	Planctomycetales	Planctomycetaceae	Rhodopirellula	Rhodopirellula_rosea
ASV_2385	0	0	19	1	0	7	0	15	6	9	4	3	1	2	0	0	0	1	2	0	1	1	0	0	1	2	3	1	79		Bacteria	Verrucomicrobia	Spartobacteria	Unassigned	Unassigned	Spartobacteria_genera_incertae_sedis	Unassigned
ASV_2402	2	3	0	7	7	11	23	1	10	0	3	9	1	1	0	1	0	0	0	0	0	0	0	0	0	0	0	0	79		Bacteria	Acidobacteria	Acidobacteria_Gp6	Unassigned	Unassigned	Gp6	Unassigned
ASV_2406	0	4	0	6	14	5	13	0	10	0	7	10	0	9	1	0	0	0	0	0	0	0	0	0	0	0	0	0	79		Bacteria	Acidobacteria	Acidobacteria_Gp4	Unassigned	Unassigned	Gp4	Unassigned
ASV_2796	1	0	0	11	4	1	2	1	8	4	8	4	4	8	1	21	0	1	0	0	0	0	0	0	0	0	0	0	79		Bacteria	Verrucomicrobia	Spartobacteria	Unassigned	Unassigned	Spartobacteria_genera_incertae_sedis	Unassigned
ASV_3646	1	0	0	1	1	1	1	2	37	0	11	13	2	5	1	3	0	0	0	0	0	0	0	0	0	0	0	0	79		Bacteria	Acidobacteria	Acidobacteria_Gp6	Unassigned	Unassigned	Gp6	Unassigned
ASV_3737	1	0	0	0	1	0	0	31	1	5	8	24	5	3	0	0	0	0	0	0	0	0	0	0	0	0	0	0	79		Bacteria	Candidatus_Saccharibacteria	Unassigned	Unassigned	Unassigned	Saccharibacteria_genera_incertae_sedis	Unassigned
ASV_5306	1	0	0	0	3	3	4	0	23	2	11	18	4	7	1	2	0	0	0	0	0	0	0	0	0	0	0	0	79		Bacteria	Acidobacteria	Acidobacteria_Gp7	Unassigned	Unassigned	Gp7	Unassigned
ASV_5695	20	0	8	2	17	2	0	0	7	2	1	3	13	2	0	2	0	0	0	0	0	0	0	0	0	0	0	0	79		Bacteria	Proteobacteria	Betaproteobacteria	Burkholderiales	Comamonadaceae	Caenimonas	Caenimonas_terrae
ASV_5875	9	0	2	6	8	9	3	6	2	0	7	2	0	3	7	0	2	0	0	0	0	13	0	0	0	0	0	0	79		Bacteria	Candidatus_Saccharibacteria	Unassigned	Unassigned	Unassigned	Saccharibacteria_genera_incertae_sedis	Unassigned
ASV_1099	4	1	0	2	59	7	1	0	0	1	1	0	0	1	1	0	0	0	0	0	0	0	0	0	0	0	0	0	78		Bacteria	Proteobacteria	Betaproteobacteria	Burkholderiales	Comamonadaceae	Variovorax	Variovorax_guangxiensis
ASV_1114	0	0	78	0	0	0	0	0	0	0	0	0	0	0	0	0	0	0	0	0	0	0	0	0	0	0	0	0	78		Bacteria	Bacteroidetes	Flavobacteriia	Flavobacteriales	Flavobacteriaceae	Flavobacterium	Unassigned
ASV_1213	2	43	0	0	0	23	2	0	0	0	1	1	0	3	1	2	0	0	0	0	0	0	0	0	0	0	0	0	78		Bacteria	Parcubacteria	Unassigned	Unassigned	Unassigned	Parcubacteria_genera_incertae_sedis	Unassigned
ASV_1234	1	0	0	0	0	0	0	0	0	0	0	0	0	0	77	0	0	0	0	0	0	0	0	0	0	0	0	0	78		Bacteria	Bacteroidetes	Cytophagia	Cytophagales	Cytophagaceae	Hymenobacter	Unassigned
ASV_1336	0	0	4	1	0	1	1	9	4	2	30	22	2	2	0	0	0	0	0	0	0	0	0	0	0	0	0	0	78		Bacteria	Parcubacteria	Unassigned	Unassigned	Unassigned	Parcubacteria_genera_incertae_sedis	Unassigned
ASV_1479	0	0	0	8	13	3	6	9	8	0	14	9	1	2	2	3	0	0	0	0	0	0	0	0	0	0	0	0	78		Bacteria	Acidobacteria	Acidobacteria_Gp4	Unassigned	Unassigned	Gp4	Unassigned
ASV_1494	0	0	0	0	0	0	0	0	1	1	1	0	0	0	0	0	2	6	11	10	9	10	3	3	3	2	10	6	78		Bacteria	Planctomycetes	Planctomycetia	Planctomycetales	Planctomycetaceae	Unassigned	Unassigned
ASV_1618	0	0	0	0	0	0	0	0	0	0	0	0	0	0	1	0	0	0	0	0	0	0	0	1	0	0	76	0	78		Bacteria	Candidatus_Saccharibacteria	Unassigned	Unassigned	Unassigned	Saccharibacteria_genera_incertae_sedis	Unassigned
ASV_1740	0	0	0	1	1	3	7	20	9	17	7	8	3	2	0	0	0	0	0	0	0	0	0	0	0	0	0	0	78		Bacteria	Candidatus_Saccharibacteria	Unassigned	Unassigned	Unassigned	Saccharibacteria_genera_incertae_sedis	Unassigned
ASV_1743	0	10	0	3	7	2	12	0	6	0	6	8	0	1	18	2	3	0	0	0	0	0	0	0	0	0	0	0	78		Bacteria	Unassigned	Unassigned	Unassigned	Unassigned	Unassigned	Unassigned
ASV_1767	4	53	0	8	1	6	1	0	0	0	0	4	0	1	0	0	0	0	0	0	0	0	0	0	0	0	0	0	78		Bacteria	Candidatus_Saccharibacteria	Unassigned	Unassigned	Unassigned	Saccharibacteria_genera_incertae_sedis	Unassigned
ASV_1792	0	0	4	0	1	0	2	11	6	15	11	17	3	8	0	0	0	0	0	0	0	0	0	0	0	0	0	0	78		Bacteria	Unassigned	Unassigned	Unassigned	Unassigned	Unassigned	Unassigned
ASV_1893	17	0	0	5	5	34	0	0	1	0	1	1	2	9	3	0	0	0	0	0	0	0	0	0	0	0	0	0	78		Bacteria	Proteobacteria	Alphaproteobacteria	Sphingomonadales	Sphingomonadaceae	Unassigned	Unassigned
ASV_1991	1	64	0	0	0	2	0	2	0	1	1	2	1	0	0	0	0	0	0	0	0	0	0	0	0	0	4	0	78		Bacteria	Unassigned	Unassigned	Unassigned	Unassigned	Unassigned	Unassigned
ASV_2526	5	37	5	0	1	0	0	3	1	2	4	2	12	1	1	0	0	0	4	0	0	0	0	0	0	0	0	0	78		Bacteria	Parcubacteria	Unassigned	Unassigned	Unassigned	Parcubacteria_genera_incertae_sedis	Unassigned
ASV_2585	2	55	0	0	0	3	3	3	2	5	0	2	0	0	1	0	1	0	0	0	0	0	1	0	0	0	0	0	78		Bacteria	Proteobacteria	Alphaproteobacteria	Rhizobiales	Rhizobiaceae	Rhizobium	Rhizobium_nepASVm
ASV_2682	0	0	0	7	11	5	4	6	12	0	7	10	0	1	2	10	1	0	1	0	0	0	0	0	0	0	1	0	78		Bacteria	Acidobacteria	Acidobacteria_Gp6	Unassigned	Unassigned	Gp6	Unassigned
ASV_2952	0	0	0	5	1	8	0	0	5	4	22	13	2	8	9	0	0	1	0	0	0	0	0	0	0	0	0	0	78		Bacteria	Candidatus_Saccharibacteria	Unassigned	Unassigned	Unassigned	Saccharibacteria_genera_incertae_sedis	Unassigned
ASV_3100	39	9	20	3	0	0	0	1	0	0	0	2	1	0	3	0	0	0	0	0	0	0	0	0	0	0	0	0	78		Bacteria	Proteobacteria	Alphaproteobacteria	Sphingomonadales	Sphingomonadaceae	Sphingomonas	Sphingomonas_abaci
ASV_3137	0	0	0	2	0	0	0	27	4	16	6	10	5	5	1	1	0	1	0	0	0	0	0	0	0	0	0	0	78		Bacteria	Planctomycetes	Planctomycetia	Planctomycetales	Planctomycetaceae	Unassigned	Unassigned
ASV_3312	0	0	0	1	2	8	1	0	9	1	11	12	8	4	0	14	5	0	2	0	0	0	0	0	0	0	0	0	78		Bacteria	Verrucomicrobia	Subdivision3	Unassigned	Unassigned	Subdivision3_genera_incertae_sedis	Unassigned
ASV_4417	2	3	2	1	2	1	8	42	2	3	5	5	0	2	0	0	0	0	0	0	0	0	0	0	0	0	0	0	78		Bacteria	Candidatus_Saccharibacteria	Unassigned	Unassigned	Unassigned	Saccharibacteria_genera_incertae_sedis	Unassigned
ASV_4542	0	0	0	0	0	0	0	0	0	0	0	0	0	0	0	0	3	10	16	0	2	5	1	3	11	12	5	10	78		Bacteria	Verrucomicrobia	Spartobacteria	Unassigned	Unassigned	Spartobacteria_genera_incertae_sedis	Unassigned
ASV_4702	0	0	1	0	0	1	10	4	3	6	15	14	1	7	5	0	1	0	0	9	0	0	1	0	0	0	0	0	78		Bacteria	Parcubacteria	Unassigned	Unassigned	Unassigned	Parcubacteria_genera_incertae_sedis	Unassigned
ASV_4970	1	0	0	7	2	25	4	3	7	4	13	7	2	2	1	0	0	0	0	0	0	0	0	0	0	0	0	0	78		Bacteria	Planctomycetes	Planctomycetia	Planctomycetales	Planctomycetaceae	Blastopirellula	Blastopirellula_cremea
ASV_5433	7	0	0	11	30	2	0	0	4	5	9	1	1	5	0	2	1	0	0	0	0	0	0	0	0	0	0	0	78		Bacteria	Bacteroidetes	Sphingobacteriia	Sphingobacteriales	Chitinophagaceae	Ferruginibacter	Ferruginibacter_lapsinanis
ASV_5765	0	0	0	17	16	5	6	0	8	0	14	5	3	0	3	1	0	0	0	0	0	0	0	0	0	0	0	0	78		Bacteria	candidate_division_WPS-1	Unassigned	Unassigned	Unassigned	WPS-1_genera_incertae_sedis	Unassigned
ASV_1049	0	0	0	0	0	0	1	0	74	0	1	1	0	0	0	0	0	0	0	0	0	0	0	0	0	0	0	0	77		Bacteria	Unassigned	Unassigned	Unassigned	Unassigned	Unassigned	Unassigned
ASV_1069	0	0	0	0	0	0	0	0	0	0	0	0	0	0	0	0	0	0	0	3	11	0	34	13	15	0	0	1	77		Bacteria	Bacteroidetes	Unassigned	Unassigned	Unassigned	Unassigned	Unassigned
ASV_1218	0	0	0	0	0	2	0	0	0	0	0	0	0	0	0	37	31	5	2	0	0	0	0	0	0	0	0	0	77		Bacteria	Proteobacteria	Betaproteobacteria	Burkholderiales	Alcaligenaceae	Unassigned	Unassigned
ASV_1248	0	32	29	1	0	3	0	5	1	2	0	1	2	1	0	0	0	0	0	0	0	0	0	0	0	0	0	0	77		Bacteria	Parcubacteria	Unassigned	Unassigned	Unassigned	Parcubacteria_genera_incertae_sedis	Unassigned
ASV_1257	0	0	0	0	0	0	0	0	0	0	0	0	0	0	0	0	1	0	1	1	5	0	1	50	0	5	5	8	77		Bacteria	Actinobacteria	Actinobacteria	Actinomycetales	Mycobacteriaceae	Mycobacterium	Unassigned
ASV_1333	0	5	0	4	1	9	6	0	8	2	13	16	7	4	1	1	0	0	0	0	0	0	0	0	0	0	0	0	77		Bacteria	Unassigned	Unassigned	Unassigned	Unassigned	Unassigned	Unassigned
ASV_1396	0	0	0	1	1	0	0	0	2	0	1	0	1	1	0	0	0	0	1	1	2	4	0	60	0	0	2	0	77		Bacteria	Verrucomicrobia	Verrucomicrobiae	Verrucomicrobiales	Verrucomicrobiaceae	Luteolibacter	Unassigned
ASV_1432	0	0	1	0	0	11	0	0	0	3	1	0	0	0	43	0	0	0	0	0	0	0	0	0	6	0	0	12	77		Bacteria	Firmicutes	Bacilli	Bacillales	Planococcaceae	Planococcus	Planococcus_maitriensis
ASV_1646	0	77	0	0	0	0	0	0	0	0	0	0	0	0	0	0	0	0	0	0	0	0	0	0	0	0	0	0	77		Bacteria	Parcubacteria	Unassigned	Unassigned	Unassigned	Parcubacteria_genera_incertae_sedis	Unassigned
ASV_1718	0	58	0	0	0	4	0	0	0	3	1	0	0	2	2	0	1	1	2	0	0	0	2	0	0	0	0	1	77		Bacteria	Proteobacteria	Gammaproteobacteria	Enterobacteriales	Enterobacteriaceae	Unassigned	Unassigned
ASV_1823	0	0	1	0	14	0	3	7	12	3	13	16	1	6	0	1	0	0	0	0	0	0	0	0	0	0	0	0	77		Bacteria	Verrucomicrobia	Verrucomicrobiae	Verrucomicrobiales	Verrucomicrobiaceae	Unassigned	Unassigned
ASV_1825	0	0	0	0	6	3	25	0	9	0	9	12	2	8	2	1	0	0	0	0	0	0	0	0	0	0	0	0	77		Bacteria	Unassigned	Unassigned	Unassigned	Unassigned	Unassigned	Unassigned
ASV_1837	41	0	0	0	0	2	0	2	1	6	11	2	3	8	1	0	0	0	0	0	0	0	0	0	0	0	0	0	77		Bacteria	Proteobacteria	Alphaproteobacteria	Sphingomonadales	Sphingomonadaceae	Sphingomonas	Unassigned
ASV_1856	0	0	0	0	0	0	0	0	0	0	0	0	0	0	0	0	0	0	7	0	0	0	0	0	0	0	70	0	77		Bacteria	Candidatus_Saccharibacteria	Unassigned	Unassigned	Unassigned	Saccharibacteria_genera_incertae_sedis	Unassigned
ASV_1897	0	71	0	0	0	5	0	0	1	0	0	0	0	0	0	0	0	0	0	0	0	0	0	0	0	0	0	0	77		Bacteria	Unassigned	Unassigned	Unassigned	Unassigned	Unassigned	Unassigned
ASV_1913	0	1	0	12	20	12	4	0	5	0	12	9	2	0	0	0	0	0	0	0	0	0	0	0	0	0	0	0	77		Bacteria	Acidobacteria	Acidobacteria_Gp4	Unassigned	Unassigned	Aridibacter	Aridibacter_famidurans
ASV_1984	11	3	7	0	0	0	0	0	0	42	1	3	4	5	0	1	0	0	0	0	0	0	0	0	0	0	0	0	77		Bacteria	Proteobacteria	Gammaproteobacteria	Enterobacteriales	Enterobacteriaceae	Yersinia	Yersinia_pekkanenii
ASV_2165	0	0	54	0	0	0	0	0	0	1	0	0	10	0	0	12	0	0	0	0	0	0	0	0	0	0	0	0	77		Bacteria	Proteobacteria	Betaproteobacteria	Burkholderiales	Burkholderiaceae	Polynucleobacter	Unassigned
ASV_2379	0	0	0	1	4	2	1	21	3	3	6	12	4	3	2	3	0	2	1	2	0	0	0	0	0	2	4	1	77		Bacteria	Verrucomicrobia	Spartobacteria	Unassigned	Unassigned	Spartobacteria_genera_incertae_sedis	Unassigned
ASV_2511	4	2	0	17	46	0	1	0	2	0	1	0	0	2	2	0	0	0	0	0	0	0	0	0	0	0	0	0	77		Bacteria	Bacteroidetes	Sphingobacteriia	Sphingobacteriales	Chitinophagaceae	Ferruginibacter	Ferruginibacter_yonginensis
ASV_2631	7	8	0	11	2	2	1	2	1	16	9	3	5	10	0	0	0	0	0	0	0	0	0	0	0	0	0	0	77		Bacteria	Actinobacteria	Actinobacteria	Actinomycetales	Unassigned	Unassigned	Unassigned
ASV_2721	1	0	0	5	15	19	2	0	6	13	5	8	1	1	1	0	0	0	0	0	0	0	0	0	0	0	0	0	77		Bacteria	Candidatus_Saccharibacteria	Unassigned	Unassigned	Unassigned	Saccharibacteria_genera_incertae_sedis	Unassigned
ASV_2728	0	6	0	2	7	12	24	1	8	0	4	5	2	4	0	2	0	0	0	0	0	0	0	0	0	0	0	0	77		Bacteria	Acidobacteria	Acidobacteria_Gp6	Unassigned	Unassigned	Gp6	Unassigned
ASV_2825	1	7	3	8	9	6	0	2	14	2	9	7	1	6	1	0	1	0	0	0	0	0	0	0	0	0	0	0	77		Archaea	Euryarchaeota	Methanobacteria	Methanobacteriales	Methanobacteriaceae	Methanobacterium	Methanobacterium_lacus
ASV_2855	0	31	0	1	1	17	1	3	6	0	1	4	4	0	0	6	2	0	0	0	0	0	0	0	0	0	0	0	77		Bacteria	Acidobacteria	Acidobacteria_Gp6	Unassigned	Unassigned	Gp6	Unassigned
ASV_3905	0	0	0	10	4	5	40	1	8	0	6	1	1	1	0	0	0	0	0	0	0	0	0	0	0	0	0	0	77		Bacteria	Acidobacteria	Acidobacteria_Gp6	Unassigned	Unassigned	Gp6	Unassigned
ASV_3908	0	0	0	0	1	1	69	0	3	0	2	0	0	0	1	0	0	0	0	0	0	0	0	0	0	0	0	0	77		Bacteria	Acidobacteria	Acidobacteria_Gp6	Unassigned	Unassigned	Gp6	Unassigned
ASV_4100	0	0	12	2	4	0	1	7	20	8	3	13	3	3	1	0	0	0	0	0	0	0	0	0	0	0	0	0	77		Bacteria	Candidatus_Saccharibacteria	Unassigned	Unassigned	Unassigned	Saccharibacteria_genera_incertae_sedis	Unassigned
ASV_4145	0	0	0	3	4	1	44	0	6	0	11	4	0	3	0	1	0	0	0	0	0	0	0	0	0	0	0	0	77		Bacteria	Acidobacteria	Acidobacteria_Gp6	Unassigned	Unassigned	Gp6	Unassigned
ASV_4948	0	0	0	13	0	1	2	0	12	5	15	17	3	2	1	6	0	0	0	0	0	0	0	0	0	0	0	0	77		Bacteria	Acidobacteria	Acidobacteria_Gp4	Unassigned	Unassigned	Aridibacter	Aridibacter_famidurans
ASV_5066	0	0	0	6	8	13	6	2	11	0	9	11	2	9	0	0	0	0	0	0	0	0	0	0	0	0	0	0	77		Bacteria	Acidobacteria	Acidobacteria_Gp4	Unassigned	Unassigned	Aridibacter	Aridibacter_famidurans
ASV_5255	1	0	0	8	8	6	3	4	12	1	2	11	5	10	1	3	1	0	1	0	0	0	0	0	0	0	0	0	77		Bacteria	Verrucomicrobia	Subdivision3	Unassigned	Unassigned	Subdivision3_genera_incertae_sedis	Unassigned
ASV_5367	0	0	0	7	9	5	5	4	6	0	12	8	0	16	2	3	0	0	0	0	0	0	0	0	0	0	0	0	77		Bacteria	Actinobacteria	Actinobacteria	Unassigned	Unassigned	Unassigned	Unassigned
ASV_1150	0	52	0	0	0	21	1	0	0	0	1	0	1	0	0	0	0	0	0	0	0	0	0	0	0	0	0	0	76		Bacteria	Parcubacteria	Unassigned	Unassigned	Unassigned	Parcubacteria_genera_incertae_sedis	Unassigned
ASV_1298	16	5	0	19	4	8	2	0	0	8	2	2	4	4	0	0	2	0	0	0	0	0	0	0	0	0	0	0	76		Bacteria	Proteobacteria	Alphaproteobacteria	Sphingomonadales	Sphingomonadaceae	Parablastomonas	Parablastomonas_arctica
ASV_1310	0	0	1	1	2	7	50	0	3	5	1	2	3	0	0	1	0	0	0	0	0	0	0	0	0	0	0	0	76		Unassigned	Unassigned	Unassigned	Unassigned	Unassigned	Unassigned	Unassigned
ASV_1320	0	0	0	0	0	0	0	0	0	16	0	0	4	0	0	4	9	1	1	2	8	0	2	11	4	1	4	9	76		Bacteria	Actinobacteria	Actinobacteria	Actinomycetales	Microbacteriaceae	Yonghaparkia	Yonghaparkia_alkaliphila
ASV_1374	0	0	2	0	0	1	0	0	0	4	0	0	3	1	4	35	10	0	1	1	2	1	0	8	1	1	0	1	76		Bacteria	Proteobacteria	Betaproteobacteria	Burkholderiales	Alcaligenaceae	Unassigned	Unassigned
ASV_1381	0	0	0	3	16	8	2	0	15	2	9	7	0	10	3	1	0	0	0	0	0	0	0	0	0	0	0	0	76		Bacteria	Acidobacteria	Acidobacteria_Gp6	Unassigned	Unassigned	Gp6	Unassigned
ASV_1390	8	2	0	4	2	10	1	0	3	1	18	0	1	17	9	0	0	0	0	0	0	0	0	0	0	0	0	0	76		Bacteria	Bacteroidetes	Cytophagia	Cytophagales	Cytophagaceae	Hymenobacter	Unassigned
ASV_1447	0	1	0	3	2	0	0	0	0	50	2	6	0	2	9	1	0	0	0	0	0	0	0	0	0	0	0	0	76		Bacteria	Deinococcus-Thermus	Deinococci	Deinococcales	Deinococcaceae	Deinococcus	Unassigned
ASV_1537	8	10	0	8	5	3	0	0	4	5	5	1	1	15	11	0	0	0	0	0	0	0	0	0	0	0	0	0	76		Bacteria	Proteobacteria	Betaproteobacteria	Burkholderiales	Oxalobacteraceae	Unassigned	Unassigned
ASV_1595	5	0	0	33	4	19	2	1	1	4	3	2	0	2	0	0	0	0	0	0	0	0	0	0	0	0	0	0	76		Bacteria	Candidatus_Saccharibacteria	Unassigned	Unassigned	Unassigned	Saccharibacteria_genera_incertae_sedis	Unassigned
ASV_1612	51	2	0	1	0	3	0	2	0	3	0	0	0	2	12	0	0	0	0	0	0	0	0	0	0	0	0	0	76		Bacteria	Actinobacteria	Actinobacteria	Actinomycetales	Micrococcaceae	Arthrobacter	Arthrobacter_agilis
ASV_1621	0	0	0	1	0	0	1	3	12	5	15	19	11	3	0	4	1	0	1	0	0	0	0	0	0	0	0	0	76		Bacteria	Verrucomicrobia	Verrucomicrobiae	Verrucomicrobiales	Verrucomicrobiaceae	Unassigned	Unassigned
ASV_1622	4	0	0	0	0	0	0	0	0	0	1	0	0	0	62	0	5	0	0	0	0	0	0	4	0	0	0	0	76		Bacteria	Proteobacteria	Alphaproteobacteria	Sphingomonadales	Sphingomonadaceae	Sphingomonas	Sphingomonas_koreensis
ASV_1623	0	0	24	0	0	0	0	0	0	32	0	0	14	1	0	4	1	0	0	0	0	0	0	0	0	0	0	0	76		Bacteria	Actinobacteria	Actinobacteria	Actinomycetales	Microbacteriaceae	Unassigned	Unassigned
ASV_1972	0	22	0	8	1	0	1	23	3	0	8	6	0	1	0	3	0	0	0	0	0	0	0	0	0	0	0	0	76		Bacteria	Planctomycetes	Planctomycetia	Planctomycetales	Planctomycetaceae	Unassigned	Unassigned
ASV_1975	0	0	0	0	0	0	1	0	9	1	1	20	11	4	2	24	1	1	1	0	0	0	0	0	0	0	0	0	76		Bacteria	Verrucomicrobia	Verrucomicrobiae	Verrucomicrobiales	Verrucomicrobiaceae	Prosthecobacter	Prosthecobacter_algae
ASV_2023	0	0	0	1	11	7	8	1	15	0	5	12	0	4	5	6	0	0	0	0	0	1	0	0	0	0	0	0	76		Bacteria	Acidobacteria	Acidobacteria_Gp6	Unassigned	Unassigned	Gp6	Unassigned
ASV_2126	5	0	0	23	3	10	1	27	2	0	0	0	1	2	2	0	0	0	0	0	0	0	0	0	0	0	0	0	76		Bacteria	Candidatus_Saccharibacteria	Unassigned	Unassigned	Unassigned	Saccharibacteria_genera_incertae_sedis	Unassigned
ASV_2298	0	40	0	0	0	28	0	0	1	0	0	5	0	0	1	1	0	0	0	0	0	0	0	0	0	0	0	0	76		Bacteria	Parcubacteria	Unassigned	Unassigned	Unassigned	Parcubacteria_genera_incertae_sedis	Unassigned
ASV_2355	0	55	0	0	0	12	2	0	0	0	2	1	1	1	0	2	0	0	0	0	0	0	0	0	0	0	0	0	76		Bacteria	Parcubacteria	Unassigned	Unassigned	Unassigned	Parcubacteria_genera_incertae_sedis	Unassigned
ASV_2691	1	8	2	1	10	3	1	3	4	19	4	0	5	3	1	7	0	0	0	0	0	4	0	0	0	0	0	0	76		Bacteria	Proteobacteria	Alphaproteobacteria	Rhodobacterales	Rhodobacteraceae	Unassigned	Unassigned
ASV_3395	0	1	0	7	4	1	21	2	5	0	12	9	3	4	0	7	0	0	0	0	0	0	0	0	0	0	0	0	76		Bacteria	Acidobacteria	Acidobacteria_Gp6	Unassigned	Unassigned	Gp6	Unassigned
ASV_3531	4	0	9	0	4	19	0	1	0	3	8	1	5	11	11	0	0	0	0	0	0	0	0	0	0	0	0	0	76		Bacteria	Bacteroidetes	Flavobacteriia	Flavobacteriales	Flavobacteriaceae	Flavobacterium	Unassigned
ASV_3759	0	0	1	5	53	4	1	0	2	0	1	1	5	1	0	2	0	0	0	0	0	0	0	0	0	0	0	0	76		Bacteria	Proteobacteria	Betaproteobacteria	Burkholderiales	Comamonadaceae	Unassigned	Unassigned
ASV_3837	0	47	3	0	0	4	1	3	4	0	5	6	2	0	0	0	1	0	0	0	0	0	0	0	0	0	0	0	76		Bacteria	Parcubacteria	Unassigned	Unassigned	Unassigned	Parcubacteria_genera_incertae_sedis	Unassigned
ASV_4045	0	0	9	0	0	0	0	0	0	0	0	0	0	0	0	0	0	0	0	0	2	3	0	49	4	2	3	4	76		Bacteria	Actinobacteria	Actinobacteria	Actinomycetales	Microbacteriaceae	Pontimonas	Pontimonas_salivibrio
ASV_4395	0	0	1	0	0	8	0	6	16	4	4	21	5	3	1	3	3	0	1	0	0	0	0	0	0	0	0	0	76		Bacteria	Chloroflexi	Caldilineae	Caldilineales	Caldilineaceae	Caldilinea	Caldilinea_tarbellica
ASV_4620	4	0	0	8	10	15	2	0	9	3	2	18	1	3	1	0	0	0	0	0	0	0	0	0	0	0	0	0	76		Bacteria	Unassigned	Unassigned	Unassigned	Unassigned	Unassigned	Unassigned
ASV_4888	0	0	43	0	1	0	0	3	0	2	0	0	4	5	0	8	0	0	8	0	0	1	0	0	0	0	0	1	76		Bacteria	Bacteroidetes	Flavobacteriia	Flavobacteriales	Flavobacteriaceae	Flavobacterium	Flavobacterium_cheniae
ASV_5339	2	0	0	18	3	2	2	11	7	4	11	10	2	3	1	0	0	0	0	0	0	0	0	0	0	0	0	0	76		Bacteria	Candidatus_Saccharibacteria	Unassigned	Unassigned	Unassigned	Saccharibacteria_genera_incertae_sedis	Unassigned
ASV_6008	0	56	0	0	0	2	2	2	1	0	5	3	1	0	1	3	0	0	0	0	0	0	0	0	0	0	0	0	76		Bacteria	Parcubacteria	Unassigned	Unassigned	Unassigned	Parcubacteria_genera_incertae_sedis	Unassigned
ASV_1199	0	0	0	0	0	0	0	0	0	0	0	0	0	0	0	0	0	0	0	0	0	0	0	0	0	0	75	0	75		Bacteria	Parcubacteria	Unassigned	Unassigned	Unassigned	Parcubacteria_genera_incertae_sedis	Unassigned
ASV_1209	1	25	0	3	1	5	3	12	0	6	8	4	2	3	0	2	0	0	0	0	0	0	0	0	0	0	0	0	75		Bacteria	Candidatus_Saccharibacteria	Unassigned	Unassigned	Unassigned	Saccharibacteria_genera_incertae_sedis	Unassigned
ASV_1259	0	0	0	0	0	0	0	0	0	0	0	0	0	0	41	28	5	0	1	0	0	0	0	0	0	0	0	0	75		Bacteria	Proteobacteria	Alphaproteobacteria	Rhizobiales	Bradyrhizobiaceae	Rhodoblastus	Unassigned
ASV_1273	0	0	0	0	0	0	0	0	0	0	0	0	0	0	24	15	21	4	5	0	0	0	0	0	0	0	5	1	75		Bacteria	Planctomycetes	Planctomycetia	Planctomycetales	Planctomycetaceae	Unassigned	Unassigned
ASV_1268	45	5	0	0	1	0	0	2	0	3	0	0	0	2	16	0	0	0	0	1	0	0	0	0	0	0	0	0	75		Bacteria	Actinobacteria	Actinobacteria	Actinomycetales	Micrococcaceae	Arthrobacter	Arthrobacter_agilis
ASV_1275	0	0	0	0	0	0	0	0	0	0	0	0	0	0	0	0	1	0	0	0	0	73	0	0	0	0	1	0	75		Bacteria	Verrucomicrobia	Verrucomicrobiae	Verrucomicrobiales	Verrucomicrobiaceae	Unassigned	Unassigned
ASV_1307	4	1	0	6	45	7	0	0	5	1	1	1	0	0	4	0	0	0	0	0	0	0	0	0	0	0	0	0	75		Bacteria	Proteobacteria	Gammaproteobacteria	Xanthomonadales	Xanthomonadaceae	Arenimonas	Unassigned
ASV_1375	7	0	0	2	2	16	0	1	0	4	10	1	1	20	8	0	1	0	0	0	0	1	0	0	0	0	1	0	75		Bacteria	Proteobacteria	Alphaproteobacteria	Caulobacterales	Caulobacteraceae	Brevundimonas	Unassigned
ASV_1497	0	0	21	0	0	0	0	2	0	6	0	3	32	0	0	5	0	0	1	1	1	0	1	0	1	0	0	1	75		Bacteria	Bacteroidetes	Flavobacteriia	Flavobacteriales	Flavobacteriaceae	Flavobacterium	Unassigned
ASV_1539	0	0	0	28	12	0	3	0	5	0	7	3	0	2	12	3	0	0	0	0	0	0	0	0	0	0	0	0	75		Bacteria	Acidobacteria	Acidobacteria_Gp4	Unassigned	Unassigned	Aridibacter	Aridibacter_famidurans
ASV_1563	0	71	0	0	0	1	1	0	0	0	1	0	0	0	0	1	0	0	0	0	0	0	0	0	0	0	0	0	75		Bacteria	Parcubacteria	Unassigned	Unassigned	Unassigned	Parcubacteria_genera_incertae_sedis	Unassigned
ASV_1609	0	74	0	0	0	0	0	0	0	0	0	1	0	0	0	0	0	0	0	0	0	0	0	0	0	0	0	0	75		Bacteria	Parcubacteria	Unassigned	Unassigned	Unassigned	Parcubacteria_genera_incertae_sedis	Unassigned
ASV_1769	1	55	1	0	2	10	2	0	0	0	0	1	1	0	0	2	0	0	0	0	0	0	0	0	0	0	0	0	75		Bacteria	Parcubacteria	Unassigned	Unassigned	Unassigned	Parcubacteria_genera_incertae_sedis	Unassigned
ASV_1775	0	2	0	3	3	2	1	1	0	18	3	0	3	11	1	5	2	2	3	2	2	3	1	2	0	0	1	4	75		Bacteria	Proteobacteria	Alphaproteobacteria	Sphingomonadales	Erythrobacteraceae	Unassigned	Unassigned
ASV_1781	0	0	0	5	2	0	2	17	6	4	3	13	1	5	7	1	0	0	0	0	0	0	0	0	0	0	9	0	75		Bacteria	Planctomycetes	Planctomycetia	Planctomycetales	Planctomycetaceae	Unassigned	Unassigned
ASV_1834	0	0	20	0	1	0	0	0	2	18	1	3	2	11	9	7	1	0	0	0	0	0	0	0	0	0	0	0	75		Bacteria	Actinobacteria	Actinobacteria	Actinomycetales	Microbacteriaceae	Unassigned	Unassigned
ASV_1862	0	0	5	0	0	0	2	6	3	11	20	13	3	7	3	0	2	0	0	0	0	0	0	0	0	0	0	0	75		Bacteria	Unassigned	Unassigned	Unassigned	Unassigned	Unassigned	Unassigned
ASV_1881	0	0	0	0	2	60	3	0	3	1	3	2	0	1	0	0	0	0	0	0	0	0	0	0	0	0	0	0	75		Bacteria	Unassigned	Unassigned	Unassigned	Unassigned	Unassigned	Unassigned
ASV_1993	25	19	0	4	4	14	0	0	0	0	5	1	1	1	1	0	0	0	0	0	0	0	0	0	0	0	0	0	75		Bacteria	Bacteroidetes	Cytophagia	Cytophagales	Cytophagaceae	Arcicella	Arcicella_rosea
ASV_2026	3	0	1	7	8	18	4	4	3	0	11	7	0	3	6	0	0	0	0	0	0	0	0	0	0	0	0	0	75		Bacteria	Candidatus_Saccharibacteria	Unassigned	Unassigned	Unassigned	Saccharibacteria_genera_incertae_sedis	Unassigned
ASV_2155	0	0	1	13	3	0	0	0	6	25	19	6	1	1	0	0	0	0	0	0	0	0	0	0	0	0	0	0	75		Bacteria	Candidatus_Saccharibacteria	Unassigned	Unassigned	Unassigned	Saccharibacteria_genera_incertae_sedis	Unassigned
ASV_2179	11	36	0	2	1	5	0	0	0	11	0	0	5	1	0	1	0	0	0	0	0	0	0	1	0	0	0	1	75		Bacteria	Actinobacteria	Actinobacteria	Actinomycetales	Microbacteriaceae	Unassigned	Unassigned
ASV_2237	0	0	0	1	1	1	56	0	1	0	1	5	1	5	3	0	0	0	0	0	0	0	0	0	0	0	0	0	75		Bacteria	Acidobacteria	Acidobacteria_Gp7	Unassigned	Unassigned	Gp7	Unassigned
ASV_2365	0	0	0	2	0	0	0	66	0	1	4	2	0	0	0	0	0	0	0	0	0	0	0	0	0	0	0	0	75		Bacteria	Candidatus_Saccharibacteria	Unassigned	Unassigned	Unassigned	Saccharibacteria_genera_incertae_sedis	Unassigned
ASV_2378	0	0	2	0	0	0	57	5	1	3	0	4	1	0	1	1	0	0	0	0	0	0	0	0	0	0	0	0	75		Bacteria	SR1	Unassigned	Unassigned	Unassigned	SR1_genera_incertae_sedis	Unassigned
ASV_2853	0	0	0	6	9	4	34	2	3	0	7	3	0	3	1	3	0	0	0	0	0	0	0	0	0	0	0	0	75		Bacteria	Acidobacteria	Acidobacteria_Gp6	Unassigned	Unassigned	Gp6	Unassigned
ASV_3204	0	0	0	12	2	15	2	7	4	5	10	7	1	3	4	3	0	0	0	0	0	0	0	0	0	0	0	0	75		Bacteria	Planctomycetes	Planctomycetia	Planctomycetales	Planctomycetaceae	Blastopirellula	Unassigned
ASV_3315	0	0	0	5	12	0	0	0	10	0	9	22	2	7	4	4	0	0	0	0	0	0	0	0	0	0	0	0	75		Bacteria	Acidobacteria	Acidobacteria_Gp6	Unassigned	Unassigned	Gp6	Unassigned
ASV_3361	0	0	0	3	0	1	2	37	4	0	7	13	2	2	0	1	2	0	0	0	0	0	0	0	0	0	0	1	75		Bacteria	Chloroflexi	Caldilineae	Caldilineales	Caldilineaceae	Caldilinea	Unassigned
ASV_3368	0	3	36	1	0	0	0	0	0	16	2	1	8	2	0	6	0	0	0	0	0	0	0	0	0	0	0	0	75		Bacteria	Proteobacteria	Betaproteobacteria	Burkholderiales	Comamonadaceae	Unassigned	Unassigned
ASV_3413	12	1	1	0	1	12	1	15	0	4	1	0	1	15	11	0	0	0	0	0	0	0	0	0	0	0	0	0	75		Bacteria	Proteobacteria	Betaproteobacteria	Burkholderiales	Oxalobacteraceae	Massilia	Unassigned
ASV_3972	0	0	0	0	1	10	55	0	0	0	3	3	0	0	0	3	0	0	0	0	0	0	0	0	0	0	0	0	75		Bacteria	Planctomycetes	Planctomycetia	Planctomycetales	Planctomycetaceae	Unassigned	Unassigned
ASV_4496	40	0	0	13	2	2	0	0	0	0	8	1	0	8	1	0	0	0	0	0	0	0	0	0	0	0	0	0	75		Bacteria	Bacteroidetes	Cytophagia	Cytophagales	Cytophagaceae	Hymenobacter	Unassigned
ASV_4751	0	30	0	3	3	8	4	0	3	1	10	8	4	1	0	0	0	0	0	0	0	0	0	0	0	0	0	0	75		Bacteria	Acidobacteria	Acidobacteria_Gp7	Unassigned	Unassigned	Gp7	Unassigned
ASV_5053	0	0	0	0	2	0	10	17	2	7	7	25	2	3	0	0	0	0	0	0	0	0	0	0	0	0	0	0	75		Bacteria	Candidatus_Saccharibacteria	Unassigned	Unassigned	Unassigned	Saccharibacteria_genera_incertae_sedis	Unassigned
ASV_5892	0	7	0	1	4	6	36	0	8	0	4	2	3	1	1	2	0	0	0	0	0	0	0	0	0	0	0	0	75		Bacteria	Unassigned	Unassigned	Unassigned	Unassigned	Unassigned	Unassigned
ASV_1231	25	0	0	5	10	1	1	0	0	0	5	1	0	5	20	1	0	0	0	0	0	0	0	0	0	0	0	0	74		Bacteria	Proteobacteria	Alphaproteobacteria	Sphingomonadales	Sphingomonadaceae	Sphingorhabdus	Sphingorhabdus_planktonica
ASV_1294	0	74	0	0	0	0	0	0	0	0	0	0	0	0	0	0	0	0	0	0	0	0	0	0	0	0	0	0	74		Bacteria	Parcubacteria	Unassigned	Unassigned	Unassigned	Parcubacteria_genera_incertae_sedis	Unassigned
ASV_1340	0	3	6	1	0	2	1	0	0	4	1	0	8	46	0	0	0	0	2	0	0	0	0	0	0	0	0	0	74		Bacteria	Bacteroidetes	Flavobacteriia	Flavobacteriales	Flavobacteriaceae	Flavobacterium	Unassigned
ASV_1350	11	8	0	8	13	2	0	1	2	5	12	2	6	1	0	1	0	0	1	0	0	0	0	0	0	1	0	0	74		Bacteria	Bacteroidetes	Sphingobacteriia	Sphingobacteriales	Chitinophagaceae	Ferruginibacter	Ferruginibacter_lapsinanis
ASV_1379	0	35	0	3	0	2	2	0	5	0	2	5	13	1	0	5	0	0	1	0	0	0	0	0	0	0	0	0	74		Bacteria	Verrucomicrobia	Verrucomicrobiae	Verrucomicrobiales	Verrucomicrobiaceae	Brevifollis	Brevifollis_gellanilyticus
ASV_1418	4	0	1	1	0	0	1	58	0	1	2	3	0	3	0	0	0	0	0	0	0	0	0	0	0	0	0	0	74		Bacteria	Candidatus_Saccharibacteria	Unassigned	Unassigned	Unassigned	Saccharibacteria_genera_incertae_sedis	Unassigned
ASV_1419	0	0	0	14	4	25	6	2	1	0	5	9	3	3	0	2	0	0	0	0	0	0	0	0	0	0	0	0	74		Bacteria	Acidobacteria	Acidobacteria_Gp4	Unassigned	Unassigned	Blastocatella	Blastocatella_fastidiosa
ASV_1496	0	0	0	0	0	0	0	0	0	0	0	0	0	0	0	0	0	2	3	0	4	15	2	24	2	0	0	22	74		Bacteria	Proteobacteria	Alphaproteobacteria	Unassigned	Unassigned	Unassigned	Unassigned
ASV_1520	1	2	34	0	0	0	0	0	0	3	1	3	11	3	2	14	0	0	0	0	0	0	0	0	0	0	0	0	74		Bacteria	Bacteroidetes	Flavobacteriia	Flavobacteriales	Flavobacteriaceae	Flavobacterium	Unassigned
ASV_1560	10	0	0	14	28	8	1	0	1	2	2	3	0	5	0	0	0	0	0	0	0	0	0	0	0	0	0	0	74		Bacteria	Bacteroidetes	Sphingobacteriia	Sphingobacteriales	Chitinophagaceae	Unassigned	Unassigned
ASV_1585	0	56	0	1	0	5	2	0	1	0	1	5	0	0	1	2	0	0	0	0	0	0	0	0	0	0	0	0	74		Bacteria	Parcubacteria	Unassigned	Unassigned	Unassigned	Parcubacteria_genera_incertae_sedis	Unassigned
ASV_1593	0	58	0	1	0	8	1	0	1	0	3	0	1	1	0	0	0	0	0	0	0	0	0	0	0	0	0	0	74		Bacteria	Parcubacteria	Unassigned	Unassigned	Unassigned	Parcubacteria_genera_incertae_sedis	Unassigned
ASV_1606	16	11	0	5	10	4	0	0	1	0	1	0	0	6	20	0	0	0	0	0	0	0	0	0	0	0	0	0	74		Bacteria	Proteobacteria	Betaproteobacteria	Burkholderiales	Oxalobacteraceae	Massilia	Massilia_aerilata
ASV_1742	0	0	1	1	0	0	0	9	12	17	6	18	8	1	0	1	0	0	0	0	0	0	0	0	0	0	0	0	74		Bacteria	Unassigned	Unassigned	Unassigned	Unassigned	Unassigned	Unassigned
ASV_1912	0	0	1	0	1	0	0	3	8	28	3	5	5	19	0	1	0	0	0	0	0	0	0	0	0	0	0	0	74		Bacteria	Actinobacteria	Actinobacteria	Actinomycetales	Unassigned	Unassigned	Unassigned
ASV_1932	1	20	0	0	0	30	2	1	0	0	8	4	1	4	2	1	0	0	0	0	0	0	0	0	0	0	0	0	74		Bacteria	Candidatus_Saccharibacteria	Unassigned	Unassigned	Unassigned	Saccharibacteria_genera_incertae_sedis	Unassigned
ASV_1945	0	0	0	0	0	0	0	0	0	0	0	0	0	0	0	0	2	1	5	6	6	7	3	15	4	6	6	13	74		Bacteria	Proteobacteria	Alphaproteobacteria	Rhodospirillales	Acetobacteraceae	Roseomonas	Roseomonas_frigidaquae
ASV_2176	0	0	1	1	0	0	0	41	0	0	7	14	3	1	3	0	3	0	0	0	0	0	0	0	0	0	0	0	74		Bacteria	Chloroflexi	Caldilineae	Caldilineales	Caldilineaceae	Caldilinea	Unassigned
ASV_2280	0	11	0	4	7	3	20	0	3	0	10	6	1	5	4	0	0	0	0	0	0	0	0	0	0	0	0	0	74		Bacteria	Actinobacteria	Actinobacteria	Unassigned	Unassigned	Unassigned	Unassigned
ASV_2312	0	0	1	0	0	0	0	18	2	13	12	4	1	2	2	0	12	0	7	0	0	0	0	0	0	0	0	0	74		Bacteria	Unassigned	Unassigned	Unassigned	Unassigned	Unassigned	Unassigned
ASV_2446	6	0	0	5	2	2	1	0	0	0	6	1	0	14	37	0	0	0	0	0	0	0	0	0	0	0	0	0	74		Bacteria	Bacteroidetes	Cytophagia	Cytophagales	Cytophagaceae	Hymenobacter	Hymenobacter_qilianensis
ASV_2486	0	0	0	5	7	2	7	1	5	2	12	5	1	9	13	3	2	0	0	0	0	0	0	0	0	0	0	0	74		Bacteria	Actinobacteria	Actinobacteria	Unassigned	Unassigned	Unassigned	Unassigned
ASV_2501	0	0	0	8	1	5	12	0	7	0	9	15	5	11	0	1	0	0	0	0	0	0	0	0	0	0	0	0	74		Bacteria	Acidobacteria	Acidobacteria_Gp4	Unassigned	Unassigned	Gp4	Unassigned
ASV_2605	0	0	0	26	3	3	3	0	5	0	15	12	2	3	2	0	0	0	0	0	0	0	0	0	0	0	0	0	74		Bacteria	Actinobacteria	Unassigned	Unassigned	Unassigned	Unassigned	Unassigned
ASV_2687	0	0	0	0	0	1	0	0	0	1	0	0	9	0	1	58	4	0	0	0	0	0	0	0	0	0	0	0	74		Bacteria	Actinobacteria	Actinobacteria	Actinomycetales	Unassigned	Unassigned	Unassigned
ASV_2763	1	45	3	0	0	0	0	2	1	1	3	3	3	2	1	1	1	0	7	0	0	0	0	0	0	0	0	0	74		Bacteria	Parcubacteria	Unassigned	Unassigned	Unassigned	Parcubacteria_genera_incertae_sedis	Unassigned
ASV_3082	0	0	2	1	3	9	1	14	3	7	12	17	2	3	0	0	0	0	0	0	0	0	0	0	0	0	0	0	74		Bacteria	Candidatus_Saccharibacteria	Unassigned	Unassigned	Unassigned	Saccharibacteria_genera_incertae_sedis	Unassigned
ASV_3179	1	0	0	10	5	5	16	0	12	1	6	5	2	9	1	1	0	0	0	0	0	0	0	0	0	0	0	0	74		Bacteria	Acidobacteria	Acidobacteria_Gp6	Unassigned	Unassigned	Gp6	Unassigned
ASV_3536	1	0	10	1	2	0	0	0	0	32	2	1	1	2	0	16	1	0	0	0	3	1	1	0	0	0	0	0	74		Bacteria	Proteobacteria	Alphaproteobacteria	Rhodobacterales	Rhodobacteraceae	Falsirhodobacter	Falsirhodobacter_deserti
ASV_3817	0	14	0	8	2	0	9	0	3	0	9	5	2	15	3	3	0	1	0	0	0	0	0	0	0	0	0	0	74		Bacteria	Actinobacteria	Actinobacteria	Unassigned	Unassigned	Unassigned	Unassigned
ASV_4181	0	0	1	7	0	1	4	38	3	4	7	4	4	1	0	0	0	0	0	0	0	0	0	0	0	0	0	0	74		Bacteria	Candidatus_Saccharibacteria	Unassigned	Unassigned	Unassigned	Saccharibacteria_genera_incertae_sedis	Unassigned
ASV_4409	30	0	0	13	9	7	0	1	0	5	2	0	1	1	5	0	0	0	0	0	0	0	0	0	0	0	0	0	74		Bacteria	Proteobacteria	Alphaproteobacteria	Sphingomonadales	Sphingomonadaceae	Sphingomonas	Unassigned
ASV_4676	0	16	0	1	2	4	4	0	18	1	2	11	3	2	6	4	0	0	0	0	0	0	0	0	0	0	0	0	74		Bacteria	Acidobacteria	Acidobacteria_Gp6	Unassigned	Unassigned	Gp6	Unassigned
ASV_5020	12	0	0	8	19	9	2	0	3	5	2	0	1	7	0	1	1	0	2	0	0	0	0	0	0	1	1	0	74		Bacteria	Proteobacteria	Gammaproteobacteria	Xanthomonadales	Xanthomonadaceae	Thermomonas	Thermomonas_carbonis
ASV_5396	41	6	0	3	1	1	1	2	1	4	2	2	1	4	4	1	0	0	0	0	0	0	0	0	0	0	0	0	74		Bacteria	Proteobacteria	Alphaproteobacteria	Sphingomonadales	Sphingomonadaceae	Sphingobium	Unassigned
ASV_5888	3	0	0	24	3	23	1	2	2	0	3	7	0	0	6	0	0	0	0	0	0	0	0	0	0	0	0	0	74		Bacteria	Candidatus_Saccharibacteria	Unassigned	Unassigned	Unassigned	Saccharibacteria_genera_incertae_sedis	Unassigned
ASV_5914	0	35	0	4	4	4	8	1	4	0	4	3	3	3	0	1	0	0	0	0	0	0	0	0	0	0	0	0	74		Bacteria	Acidobacteria	Acidobacteria_Gp6	Unassigned	Unassigned	Gp6	Unassigned
ASV_5938	0	38	3	0	0	13	1	8	0	1	2	4	2	0	1	0	0	0	1	0	0	0	0	0	0	0	0	0	74		Bacteria	Parcubacteria	Unassigned	Unassigned	Unassigned	Parcubacteria_genera_incertae_sedis	Unassigned
ASV_6034	0	30	0	6	2	0	2	0	7	0	8	7	2	7	1	2	0	0	0	0	0	0	0	0	0	0	0	0	74		Bacteria	candidate_division_WPS-1	Unassigned	Unassigned	Unassigned	WPS-1_genera_incertae_sedis	Unassigned
[truncated: 3,051 more rows]
